# Supplementary material for: Metabolomics and Transcriptomics Integration of Early Response of Populus tomentosa to Reduced Nitrogen Availability
Source: Front Plant Sci. 2021 Dec 8;12:769748. doi: 10.3389/fpls.2021.769748 (PMC8692568; doi:10.3389/fpls.2021.769748)
Supplement: Supplementary file 12 [file Table_7.XLSX]

## Sheet: Sheet1
Supplementary Table S7. All unigene annotation of Populus trementosa under nitrogen deficiency.
Gene ID	Gene Length	DN_raw fragments	DN_FPKM	KK_raw fragments	KK_FPKM	Nr-ID	Nr-Score	Nr-Evalue	Nr-annotation	Nt-ID	Nt-Score	Nt-Evalue	Nt-annotation	Swissprot-ID	Swissprot-Score	Swissprot-Evalue	Swissprot-annotation
CL1.Contig1_All	599	44	4.0945	57	5.4803	--	--	--	--	--	--	--	--	--	--	--	--
CL1.Contig2_All	225	0	0	0	0	--	--	--	--	--	--	--	--	--	--	--	--
CL10.Contig1_All	215	5	1.2963	4	1.0715	--	--	--	--	gi|166157594|gb|AC216942.1|	317	2e-84	Populus trichocarpa clone POP024-B10, complete sequence	--	--	--	--
CL10.Contig2_All	215	5	1.2963	3	0.8036	--	--	--	--	gi|166157594|gb|AC216942.1|	323	4e-86	Populus trichocarpa clone POP024-B10, complete sequence	--	--	--	--
CL100.Contig10_All	731	150	11.4379	110	8.6663	gi|224114718|ref|XP_002332307.1|	134.8	1e-30	predicted protein [Populus trichocarpa] >gi|222832306|gb|EEE70783.1| predicted protein [Populus trichocarpa]	gi|157265595|gb|AC210135.1|	470	1e-129	Populus trichocarpa clone POP101-G08, complete sequence	sp|Q42484|RPS2_ARATH	48.1	5e-06	Disease resistance protein RPS2 OS=Arabidopsis thaliana GN=RPS2 PE=1 SV=1
CL100.Contig11_All	212	7	1.8405	8	2.1733	gi|224114718|ref|XP_002332307.1|	97.1	9e-20	predicted protein [Populus trichocarpa] >gi|222832306|gb|EEE70783.1| predicted protein [Populus trichocarpa]	gi|156523318|gb|AC209047.1|	123	7e-26	Populus trichocarpa clone POP078-A23, complete sequence	--	--	--	--
CL100.Contig1_All	637	317	27.739	203	18.3534	gi|224114718|ref|XP_002332307.1|	143.3	2e-33	predicted protein [Populus trichocarpa] >gi|222832306|gb|EEE70783.1| predicted protein [Populus trichocarpa]	gi|224117085|ref|XM_002331747.1|	430	1e-118	Populus trichocarpa cc-nbs-lrr resistance protein, mRNA	--	--	--	--
CL100.Contig2_All	659	438	37.0476	262	22.8968	gi|224114718|ref|XP_002332307.1|	153.7	2e-36	predicted protein [Populus trichocarpa] >gi|222832306|gb|EEE70783.1| predicted protein [Populus trichocarpa]	gi|224117085|ref|XM_002331747.1|	430	1e-118	Populus trichocarpa cc-nbs-lrr resistance protein, mRNA	--	--	--	--
CL100.Contig3_All	563	44	4.3563	28	2.8642	gi|224114718|ref|XP_002332307.1|	100.1	2e-20	predicted protein [Populus trichocarpa] >gi|222832306|gb|EEE70783.1| predicted protein [Populus trichocarpa]	gi|146149430|gb|AC203075.1|	301	4e-79	Populus trichocarpa clone Pop1-112P9, complete sequence	--	--	--	--
CL100.Contig4_All	761	107	7.8374	171	12.9411	gi|224114718|ref|XP_002332307.1|	158.3	1e-37	predicted protein [Populus trichocarpa] >gi|222832306|gb|EEE70783.1| predicted protein [Populus trichocarpa]	gi|157265595|gb|AC210135.1|	462	1e-127	Populus trichocarpa clone POP101-G08, complete sequence	sp|Q42484|RPS2_ARATH	50.8	8e-07	Disease resistance protein RPS2 OS=Arabidopsis thaliana GN=RPS2 PE=1 SV=1
CL100.Contig5_All	360	33	5.1096	17	2.7196	gi|224061401|ref|XP_002300461.1|	169.9	1e-41	predicted protein [Populus trichocarpa] >gi|222847719|gb|EEE85266.1| predicted protein [Populus trichocarpa]	gi|157265595|gb|AC210135.1|	260	9e-67	Populus trichocarpa clone POP101-G08, complete sequence	--	--	--	--
CL100.Contig6_All	390	39	5.5741	26	3.8394	gi|224061401|ref|XP_002300461.1|	200.7	6e-51	predicted protein [Populus trichocarpa] >gi|222847719|gb|EEE85266.1| predicted protein [Populus trichocarpa]	gi|157265595|gb|AC210135.1|	432	1e-118	Populus trichocarpa clone POP101-G08, complete sequence	--	--	--	--
CL100.Contig7_All	536	6	0.624	9	0.967	gi|224056651|ref|XP_002298955.1|	286.6	1e-76	predicted protein [Populus trichocarpa] >gi|222846213|gb|EEE83760.1| predicted protein [Populus trichocarpa]	gi|156139194|gb|AC208739.1|	440	1e-121	Populus trichocarpa clone JGIACSB1077-H05, complete sequence	--	--	--	--
CL100.Contig8_All	326	1	0.171	0	0	gi|224056651|ref|XP_002298955.1|	190.7	6e-48	predicted protein [Populus trichocarpa] >gi|222846213|gb|EEE83760.1| predicted protein [Populus trichocarpa]	gi|156139194|gb|AC208739.1|	440	1e-121	Populus trichocarpa clone JGIACSB1077-H05, complete sequence	sp|Q9T048|DRL27_ARATH	45.1	1e-05	Disease resistance protein At4g27190 OS=Arabidopsis thaliana GN=At4g27190 PE=2 SV=1
CL100.Contig9_All	566	30	2.9544	20	2.035	gi|224056643|ref|XP_002298951.1|	278.9	3e-74	predicted protein [Populus trichocarpa] >gi|222846209|gb|EEE83756.1| predicted protein [Populus trichocarpa]	gi|156139194|gb|AC208739.1|	638	1e-180	Populus trichocarpa clone JGIACSB1077-H05, complete sequence	--	--	--	--
CL1000.Contig1_All	1423	638	24.9912	573	23.1904	gi|224084864|ref|XP_002307428.1|	86.3	1e-15	predicted protein [Populus trichocarpa] >gi|222856877|gb|EEE94424.1| predicted protein [Populus trichocarpa]	gi|156104927|gb|AC208373.1|	527	1e-146	Populus trichocarpa clone JGIACSB249-H05, complete sequence	sp|Q7XTT4|NUCL2_ORYSJ	62	8e-10	Nucleolin 2 OS=Oryza sativa subsp. japonica GN=Os04g0620700 PE=2 SV=2
CL1000.Contig2_All	1911	820	23.918	681	20.5232	gi|224063106|ref|XP_002300995.1|	830.9	0	predicted protein [Populus trichocarpa] >gi|222842721|gb|EEE80268.1| predicted protein [Populus trichocarpa]	gi|156104927|gb|AC208373.1|	335	1e-88	Populus trichocarpa clone JGIACSB249-H05, complete sequence	sp|Q9FVQ1|NUCL1_ARATH	59.7	6e-09	Nucleolin 1 OS=Arabidopsis thaliana GN=NUCL1 PE=1 SV=1
CL10000.Contig1_All	265	22	4.6275	27	5.8678	gi|224097220|ref|XP_002310882.1|	174.5	4e-43	AP2 domain-containing transcription factor [Populus trichocarpa] >gi|222853785|gb|EEE91332.1| AP2 domain-containing transcription factor [Populus trichocarpa]	gi|224097219|ref|XM_002310846.1|	454	1e-125	Populus trichocarpa AP2 domain-containing transcription factor (RAP13), mRNA	--	--	--	--
CL10000.Contig2_All	353	28	4.4214	18	2.9367	gi|224097220|ref|XP_002310882.1|	172.6	1e-42	AP2 domain-containing transcription factor [Populus trichocarpa] >gi|222853785|gb|EEE91332.1| AP2 domain-containing transcription factor [Populus trichocarpa]	gi|157410316|gb|AC210555.1|	589	1e-166	Populus trichocarpa clone POP104-J03, complete sequence	sp|Q38914|ANT_ARATH	67.8	1e-12	AP2-like ethylene-responsive transcription factor ANT OS=Arabidopsis thaliana GN=ANT PE=1 SV=2
CL10001.Contig1_All	1718	1067	34.6189	1014	33.9918	gi|224104177|ref|XP_002313348.1|	946.8	0	predicted protein [Populus trichocarpa] >gi|222849756|gb|EEE87303.1| predicted protein [Populus trichocarpa]	gi|100912961|gb|AC184080.2|	1233	0	Populus trichocarpa clone Pop1-54I3, complete sequence	sp|Q1PEP5|NUCL2_ARATH	58.9	9e-09	Nucleolin 2 OS=Arabidopsis thaliana GN=NUCL2 PE=2 SV=1
CL10001.Contig2_All	230	12	2.9082	16	4.0064	gi|224059544|ref|XP_002299899.1|	147.9	4e-35	predicted protein [Populus trichocarpa] >gi|222847157|gb|EEE84704.1| predicted protein [Populus trichocarpa]	gi|100912961|gb|AC184080.2|	323	4e-86	Populus trichocarpa clone Pop1-54I3, complete sequence	--	--	--	--
CL10002.Contig1_All	1605	3631	126.102	2871	103.019	gi|224075942|ref|XP_002304839.1|	854	0	predicted protein [Populus trichocarpa] >gi|222842271|gb|EEE79818.1| predicted protein [Populus trichocarpa]	gi|166091647|gb|AC216916.1|	785	0	Populus trichocarpa clone POP055-M20, complete sequence	--	--	--	--
CL10003.Contig1_All	1007	67	3.7087	159	9.0934	gi|224146222|ref|XP_002325927.1|	439.9	3e-122	predicted protein [Populus trichocarpa] >gi|222862802|gb|EEF00309.1| predicted protein [Populus trichocarpa]	gi|224146221|ref|XM_002325891.1|	1530	0	Populus trichocarpa predicted protein, mRNA	sp|Q9FPQ6|GP1_CHLRE	54.3	1e-07	Vegetative cell wall protein gp1 OS=Chlamydomonas reinhardtii GN=GP1 PE=2 SV=1
CL10003.Contig2_All	975	82	4.6879	250	14.7671	gi|224146222|ref|XP_002325927.1|	441	1e-122	predicted protein [Populus trichocarpa] >gi|222862802|gb|EEF00309.1| predicted protein [Populus trichocarpa]	gi|224146221|ref|XM_002325891.1|	1576	0	Populus trichocarpa predicted protein, mRNA	sp|Q9FPQ6|GP1_CHLRE	54.3	1e-07	Vegetative cell wall protein gp1 OS=Chlamydomonas reinhardtii GN=GP1 PE=2 SV=1
CL10004.Contig1_All	891	45	2.8152	30	1.9391	gi|224140835|ref|XP_002323784.1|	485.3	5e-136	predicted protein [Populus trichocarpa] >gi|222866786|gb|EEF03917.1| predicted protein [Populus trichocarpa]	gi|158303387|gb|AC212804.1|	1374	0	Populus trichocarpa clone POP033-C13, complete sequence	sp|Q9SRR1|FBL12_ARATH	308	2e-84	F-box/LRR-repeat protein 12 OS=Arabidopsis thaliana GN=FBL12 PE=2 SV=1
CL10004.Contig2_All	1195	124	5.784	90	4.3374	gi|224140835|ref|XP_002323784.1|	527.3	1e-148	predicted protein [Populus trichocarpa] >gi|222866786|gb|EEF03917.1| predicted protein [Populus trichocarpa]	gi|158303387|gb|AC212804.1|	2105	0	Populus trichocarpa clone POP033-C13, complete sequence	sp|Q9SRR1|FBL12_ARATH	334	7e-92	F-box/LRR-repeat protein 12 OS=Arabidopsis thaliana GN=FBL12 PE=2 SV=1
CL10005.Contig1_All	1098	778	39.4956	816	42.8003	gi|224141787|ref|XP_002324245.1|	494.6	1e-138	predicted protein [Populus trichocarpa] >gi|222865679|gb|EEF02810.1| predicted protein [Populus trichocarpa]	gi|160954829|emb|CU230383.1|	1168	0	Populus EST from mild drought-stressed leaves	sp|Q7DLR9|PSB4_ARATH	398	3e-111	Proteasome subunit beta type-4 OS=Arabidopsis thaliana GN=PBG1 PE=1 SV=2
CL10005.Contig2_All	1052	773	40.9577	671	36.7338	gi|224089062|ref|XP_002308619.1|	497.3	1e-139	predicted protein [Populus trichocarpa] >gi|222854595|gb|EEE92142.1| predicted protein [Populus trichocarpa]	gi|160954829|emb|CU230383.1|	791	0	Populus EST from mild drought-stressed leaves	sp|Q7DLR9|PSB4_ARATH	392	2e-109	Proteasome subunit beta type-4 OS=Arabidopsis thaliana GN=PBG1 PE=1 SV=2
CL10006.Contig1_All	3627	1636	25.1424	1294	20.5469	gi|224134621|ref|XP_002327449.1|	2187.9	0	aminophospholipid ATPase [Populus trichocarpa] >gi|222836003|gb|EEE74424.1| aminophospholipid ATPase [Populus trichocarpa]	gi|224134620|ref|XM_002327413.1|	6619	0	Populus trichocarpa aminophospholipid ATPase, mRNA	sp|Q9SLK6|ALA6_ARATH	1686	0	Phospholipid-transporting ATPase 6 OS=Arabidopsis thaliana GN=ALA6 PE=1 SV=2
CL10007.Contig1_All	618	13	1.1725	12	1.1183	--	--	--	--	gi|224140550|ref|XM_002323610.1|	69.9	3e-09	Populus trichocarpa predicted protein, mRNA	--	--	--	--
CL10007.Contig2_All	589	19	1.7981	10	0.9778	gi|224140549|ref|XP_002323645.1|	69.3	4e-11	predicted protein [Populus trichocarpa] >gi|222868275|gb|EEF05406.1| predicted protein [Populus trichocarpa]	gi|224140548|ref|XM_002323609.1|	170	1e-39	Populus trichocarpa predicted protein, mRNA	sp|Q9M2Y7|PP274_ARATH	57.4	6e-09	Pentatricopeptide repeat-containing protein At3g49710 OS=Arabidopsis thaliana GN=PCMP-H79 PE=2 SV=1
CL10008.Contig1_All	951	133	7.7955	162	9.8106	gi|224143580|ref|XP_002325004.1|	413.7	2e-114	predicted protein [Populus trichocarpa] >gi|222866438|gb|EEF03569.1| predicted protein [Populus trichocarpa]	gi|359484568|ref|XM_002284169.2|	601	1e-169	PREDICTED: Vitis vinifera rac-like GTP-binding protein ARAC7, transcript variant 1 (LOC100266265), mRNA	sp|O82480|RAC7_ARATH	377	4e-105	Rac-like GTP-binding protein ARAC7 OS=Arabidopsis thaliana GN=ARAC7 PE=1 SV=1
CL10009.Contig1_All	357	17	2.6543	29	4.6783	--	--	--	--	--	--	--	--	--	--	--	--
CL10009.Contig2_All	543	34	3.4902	49	5.197	--	--	--	--	--	--	--	--	--	--	--	--
CL1001.Contig1_All	202	55	15.1769	39	11.1192	gi|224067076|ref|XP_002302343.1|	108.2	4e-23	predicted protein [Populus trichocarpa] >gi|222844069|gb|EEE81616.1| predicted protein [Populus trichocarpa]	gi|159647943|gb|AC214096.1|	202	9e-50	Populus trichocarpa clone POP019-C06, complete sequence	--	--	--	--
CL1001.Contig2_All	1063	40	2.0975	69	3.7383	gi|224067076|ref|XP_002302343.1|	321.6	1e-86	predicted protein [Populus trichocarpa] >gi|222844069|gb|EEE81616.1| predicted protein [Populus trichocarpa]	gi|159647943|gb|AC214096.1|	1659	0	Populus trichocarpa clone POP019-C06, complete sequence	--	--	--	--
CL1001.Contig3_All	1326	131	5.5068	139	6.0371	gi|224067076|ref|XP_002302343.1|	567	2e-160	predicted protein [Populus trichocarpa] >gi|222844069|gb|EEE81616.1| predicted protein [Populus trichocarpa]	gi|159647943|gb|AC214096.1|	1645	0	Populus trichocarpa clone POP019-C06, complete sequence	sp|Q9SN46|LRX5_ARATH	57.4	2e-08	Leucine-rich repeat extensin-like protein 5 OS=Arabidopsis thaliana GN=LRX5 PE=2 SV=2
CL1001.Contig4_All	948	101	5.9386	86	5.2246	gi|224067076|ref|XP_002302343.1|	321.6	1e-86	predicted protein [Populus trichocarpa] >gi|222844069|gb|EEE81616.1| predicted protein [Populus trichocarpa]	gi|159647943|gb|AC214096.1|	1756	0	Populus trichocarpa clone POP019-C06, complete sequence	sp|Q9SN46|LRX5_ARATH	48.5	6e-06	Leucine-rich repeat extensin-like protein 5 OS=Arabidopsis thaliana GN=LRX5 PE=2 SV=2
CL10010.Contig1_All	460	65	7.8764	62	7.7623	gi|157093563|gb|ABV22436.1|	194.1	6e-49	cysteine proteinase [Oxyrrhis marina]	gi|260516671|gb|GQ871461.1|	61.9	5e-07	Brachiaria hybrid cultivar CIAT:36062 cysteine protease 3 (BCP3) gene, partial cds	sp|P43156|CYSP_HEMSP	167	2e-42	Thiol protease SEN102 OS=Hemerocallis sp. GN=SEN102 PE=2 SV=1
CL10010.Contig2_All	466	37	4.4258	26	3.2133	gi|157093563|gb|ABV22436.1|	187.6	5e-47	cysteine proteinase [Oxyrrhis marina]	gi|260516671|gb|GQ871461.1|	61.9	5e-07	Brachiaria hybrid cultivar CIAT:36062 cysteine protease 3 (BCP3) gene, partial cds	sp|P43156|CYSP_HEMSP	163	4e-41	Thiol protease SEN102 OS=Hemerocallis sp. GN=SEN102 PE=2 SV=1
CL10011.Contig1_All	1000	155	8.6398	153	8.8115	gi|118488749|gb|ABK96185.1|	495	8e-139	unknown [Populus trichocarpa]	gi|224136056|ref|XM_002327334.1|	218	9e-54	Populus trichocarpa phenylcoumaran benzylic ether reductase -like protein (PCBERp3), mRNA	sp|Q15GI4|EGS1_OCIBA	390	5e-109	Eugenol synthase 1 OS=Ocimum basilicum GN=EGS1 PE=1 SV=1
CL10012.Contig1_All	349	70	11.1801	40	6.6008	--	--	--	--	gi|157311799|gb|AC210341.1|	547	1e-153	Populus trichocarpa clone POP085-M05, complete sequence	--	--	--	--
CL10012.Contig2_All	316	31	5.4682	18	3.2805	--	--	--	--	gi|157311799|gb|AC210341.1|	109	2e-21	Populus trichocarpa clone POP085-M05, complete sequence	--	--	--	--
CL10013.Contig1_All	1617	611	21.0622	604	21.5123	gi|224125536|ref|XP_002329829.1|	857.4	0	predicted protein [Populus trichocarpa] >gi|222870891|gb|EEF08022.1| predicted protein [Populus trichocarpa]	gi|470115202|ref|XM_004293744.1|	204	2e-49	PREDICTED: Fragaria vesca subsp. vesca glyoxysomal processing protease, glyoxysomal-like (LOC101299065), mRNA	sp|Q8VZD4|DEG15_ARATH	486	2e-137	Glyoxysomal processing protease, glyoxysomal OS=Arabidopsis thaliana GN=DEG15 PE=1 SV=2
CL10013.Contig2_All	1555	335	12.0084	294	10.8887	gi|224077082|ref|XP_002305124.1|	862.4	0	predicted protein [Populus trichocarpa] >gi|222848088|gb|EEE85635.1| predicted protein [Populus trichocarpa]	gi|470115202|ref|XM_004293744.1|	198	1e-47	PREDICTED: Fragaria vesca subsp. vesca glyoxysomal processing protease, glyoxysomal-like (LOC101299065), mRNA	sp|Q8VZD4|DEG15_ARATH	424	7e-119	Glyoxysomal processing protease, glyoxysomal OS=Arabidopsis thaliana GN=DEG15 PE=1 SV=2
CL10014.Contig1_All	270	14	2.8903	13	2.7729	gi|224140667|ref|XP_002323702.1|	182.6	1e-45	predicted protein [Populus trichocarpa] >gi|222868332|gb|EEF05463.1| predicted protein [Populus trichocarpa]	gi|470133262|ref|XM_004302441.1|	264	4e-68	PREDICTED: Fragaria vesca subsp. vesca probable leucine-rich repeat receptor-like protein kinase At5g49770-like (LOC101315445), mRNA	sp|Q9LT96|Y5977_ARATH	144	1e-35	Probable leucine-rich repeat receptor-like protein kinase At5g49770 OS=Arabidopsis thaliana GN=At5g49770 PE=2 SV=1
CL10015.Contig1_All	360	39	6.0386	25	3.9994	gi|302143676|emb|CBI22537.3|	117.5	6e-26	unnamed protein product [Vitis vinifera]	gi|225462742|ref|XM_002268070.1|	61.9	4e-07	PREDICTED: Vitis vinifera uncharacterized LOC100248390 (LOC100248390), mRNA	--	--	--	--
CL10015.Contig2_All	725	89	6.8426	77	6.1166	gi|302143676|emb|CBI22537.3|	273.1	3e-72	unnamed protein product [Vitis vinifera]	gi|225462742|ref|XM_002268070.1|	125	7e-26	PREDICTED: Vitis vinifera uncharacterized LOC100248390 (LOC100248390), mRNA	--	--	--	--
CL10015.Contig3_All	291	19	3.6394	49	9.6976	gi|302143676|emb|CBI22537.3|	108.6	3e-23	unnamed protein product [Vitis vinifera]	--	--	--	--	--	--	--	--
CL10016.Contig1_All	1391	305	12.2221	286	11.8413	gi|224099669|ref|XP_002311572.1|	734.2	0	predicted protein [Populus trichocarpa] >gi|222851392|gb|EEE88939.1| predicted protein [Populus trichocarpa]	gi|470123524|ref|XM_004297727.1|	628	1e-177	PREDICTED: Fragaria vesca subsp. vesca aldo-keto reductase family 4 member C9-like (LOC101302157), mRNA	sp|Q84TF0|AKRCA_ARATH	250	1e-66	Aldo-keto reductase family 4 member C10 OS=Arabidopsis thaliana GN=AKR4C10 PE=1 SV=1
CL10017.Contig1_All	1066	2754	144.005	2591	139.981	gi|224101737|ref|XP_002312401.1|	500.7	1e-140	predicted protein [Populus trichocarpa] >gi|222852221|gb|EEE89768.1| predicted protein [Populus trichocarpa]	gi|160951427|emb|CU223730.1|	1507	0	Populus EST from leave	sp|P31165|RK15_PEA	356	1e-98	50S ribosomal protein L15, chloroplastic (Fragment) OS=Pisum sativum GN=RPL15 PE=2 SV=1
CL10017.Contig2_All	218	10	2.5569	10	2.6418	gi|388494588|gb|AFK35360.1|	52.8	2e-18	unknown [Lotus japonicus]	gi|160949969|emb|CU223006.1|	182	1e-43	Populus EST from leave	sp|P25873|RK15_ARATH	54.7	2e-18	50S ribosomal protein L15, chloroplastic OS=Arabidopsis thaliana GN=RPL15 PE=1 SV=2
CL10017.Contig3_All	233	4	0.9569	6	1.483	gi|224101737|ref|XP_002312401.1|	52	3e-06	predicted protein [Populus trichocarpa] >gi|222852221|gb|EEE89768.1| predicted protein [Populus trichocarpa]	gi|160949969|emb|CU223006.1|	196	7e-48	Populus EST from leave	sp|P31165|RK15_PEA	51.6	1e-15	50S ribosomal protein L15, chloroplastic (Fragment) OS=Pisum sativum GN=RPL15 PE=2 SV=1
CL10018.Contig1_All	856	188	12.2421	265	17.8292	gi|224129716|ref|XP_002328785.1|	479.9	2e-134	predicted protein [Populus trichocarpa] >gi|222839083|gb|EEE77434.1| predicted protein [Populus trichocarpa]	gi|160954060|emb|CU230055.1|	1130	0	Populus EST from mild drought-stressed leaves	--	--	--	--
CL10018.Contig2_All	483	14	1.6157	9	1.0731	gi|224129716|ref|XP_002328785.1|	279.3	1e-74	predicted protein [Populus trichocarpa] >gi|222839083|gb|EEE77434.1| predicted protein [Populus trichocarpa]	gi|160954060|emb|CU230055.1|	601	1e-169	Populus EST from mild drought-stressed leaves	--	--	--	--
CL10019.Contig1_All	1178	256	12.1134	209	10.2179	gi|224133062|ref|XP_002327952.1|	659.1	0	nbs-lrr resistance protein [Populus trichocarpa] >gi|222837361|gb|EEE75740.1| nbs-lrr resistance protein [Populus trichocarpa]	gi|224133061|ref|XM_002327916.1|	1780	0	Populus trichocarpa nbs-lrr resistance protein, mRNA	sp|O81825|DRL28_ARATH	192	4e-49	Probable disease resistance protein At4g27220 OS=Arabidopsis thaliana GN=At4g27220 PE=2 SV=1
CL10019.Contig2_All	212	17	4.4698	6	1.63	gi|224144470|ref|XP_002325299.1|	94	7e-19	BED finger-nbs resistance protein [Populus trichocarpa] >gi|222862174|gb|EEE99680.1| BED finger-nbs resistance protein [Populus trichocarpa]	gi|224133061|ref|XM_002327916.1|	155	2e-35	Populus trichocarpa nbs-lrr resistance protein, mRNA	sp|Q9SSR8|DRL6_ARATH	57	2e-09	Probable disease resistance protein At1g52660 OS=Arabidopsis thaliana GN=At1g52660 PE=2 SV=1
CL1002.Contig1_All	746	138	10.3113	130	10.0361	gi|224145886|ref|XP_002325799.1|	417.9	8e-116	predicted protein [Populus trichocarpa] >gi|222862674|gb|EEF00181.1| predicted protein [Populus trichocarpa]	gi|190897553|gb|EU823693.1|	668	0	Populus tremula isolate swl429-64E 4-triphosphate 56-kinase gene, partial cds	sp|Q9SBA5|ITPK1_ARATH	226	1e-59	Inositol-tetrakisphosphate 1-kinase 1 OS=Arabidopsis thaliana GN=ITPK1 PE=2 SV=1
CL1002.Contig2_All	668	49	4.0888	30	2.5864	gi|224145886|ref|XP_002325799.1|	52	2e-96	predicted protein [Populus trichocarpa] >gi|222862674|gb|EEF00181.1| predicted protein [Populus trichocarpa]	gi|190897553|gb|EU823693.1|	644	0	Populus tremula isolate swl429-64E 4-triphosphate 56-kinase gene, partial cds	sp|Q9SBA5|ITPK1_ARATH	181	4e-46	Inositol-tetrakisphosphate 1-kinase 1 OS=Arabidopsis thaliana GN=ITPK1 PE=2 SV=1
CL10020.Contig1_All	851	266	17.423	221	14.9562	gi|224139480|ref|XP_002323132.1|	469.5	2e-131	predicted protein [Populus trichocarpa] >gi|222867762|gb|EEF04893.1| predicted protein [Populus trichocarpa]	gi|359496947|ref|XM_003635332.1|	172	4e-40	PREDICTED: Vitis vinifera cytosolic Fe-S cluster assembly factor NARFL-like (LOC100267779), mRNA	--	--	--	--
CL10020.Contig2_All	1186	313	14.7106	247	11.9942	gi|224086530|ref|XP_002307904.1|	685.3	0	predicted protein [Populus trichocarpa] >gi|222853880|gb|EEE91427.1| predicted protein [Populus trichocarpa]	gi|359496947|ref|XM_003635332.1|	272	8e-70	PREDICTED: Vitis vinifera cytosolic Fe-S cluster assembly factor NARFL-like (LOC100267779), mRNA	--	--	--	--
CL10021.Contig1_All	2459	3114	70.5881	2784	65.2033	gi|224073272|ref|XP_002304054.1|	1174.5	0	predicted protein [Populus trichocarpa] >gi|222841486|gb|EEE79033.1| predicted protein [Populus trichocarpa]	gi|470131220|ref|XM_004301447.1|	1287	0	PREDICTED: Fragaria vesca subsp. vesca transmembrane 9 superfamily member 3-like (LOC101309262), mRNA	--	--	--	--
CL10021.Contig2_All	780	242	17.2939	200	14.7671	gi|224118356|ref|XP_002331462.1|	236.1	4e-61	predicted protein [Populus trichocarpa] >gi|222873540|gb|EEF10671.1| predicted protein [Populus trichocarpa]	gi|359486183|ref|XM_002269462.2|	345	4e-92	PREDICTED: Vitis vinifera transmembrane 9 superfamily member 3-like (LOC100254188), mRNA	--	--	--	--
CL10022.Contig1_All	290	6	1.1533	11	2.1845	--	--	--	--	gi|166157596|gb|AC216944.1|	167	8e-39	Populus trichocarpa clone POP072-L18, complete sequence	--	--	--	--
CL10022.Contig2_All	618	73	6.5842	62	5.7778	gi|224081439|ref|XP_002306411.1|	123.6	2e-27	predicted protein [Populus trichocarpa] >gi|222855860|gb|EEE93407.1| predicted protein [Populus trichocarpa]	gi|470115823|ref|XM_004294043.1|	131	9e-28	PREDICTED: Fragaria vesca subsp. vesca cyclin-T1-5-like (LOC101291503), mRNA	sp|Q2QQS5|CCT14_ORYSJ	107	5e-24	Cyclin-T1-4 OS=Oryza sativa subsp. japonica GN=CYCT1-1 PE=2 SV=1
CL10023.Contig1_All	1289	264	11.4162	441	19.7036	gi|224140611|ref|XP_002323675.1|	626.7	2e-178	predicted protein [Populus trichocarpa] >gi|222868305|gb|EEF05436.1| predicted protein [Populus trichocarpa]	gi|160952399|emb|CU224050.1|	250	3e-63	Populus EST from leave	sp|Q9LY00|WRK70_ARATH	146	3e-35	Probable WRKY transcription factor 70 OS=Arabidopsis thaliana GN=WRKY70 PE=2 SV=1
CL10023.Contig2_All	1196	308	14.3546	432	20.8023	gi|224091122|ref|XP_002309186.1|	639	0	predicted protein [Populus trichocarpa] >gi|222855162|gb|EEE92709.1| predicted protein [Populus trichocarpa]	gi|160952399|emb|CU224050.1|	1130	0	Populus EST from leave	sp|Q9LY00|WRK70_ARATH	140	2e-33	Probable WRKY transcription factor 70 OS=Arabidopsis thaliana GN=WRKY70 PE=2 SV=1
CL10024.Contig1_All	312	29	5.181	44	8.1219	--	--	--	--	gi|224104858|ref|XM_002313559.1|	61.9	4e-07	Populus trichocarpa predicted protein, mRNA	--	--	--	--
CL10024.Contig2_All	250	4	0.8918	26	5.9895	--	--	--	--	--	--	--	--	--	--	--	--
CL10025.Contig1_All	1849	624	18.8113	611	19.0311	gi|255564699|ref|XP_002523344.1|	875.5	0	protein with unknown function [Ricinus communis] >gi|223537432|gb|EEF39060.1| protein with unknown function [Ricinus communis]	gi|356560178|ref|XM_003548324.1|	404	1e-109	PREDICTED: Glycine max uncharacterized protein LOC100815111 (LOC100815111), mRNA	sp|Q9C671|P4K2B_ARATH	203	3e-52	Probable phosphatidylinositol 4-kinase type 2-beta At1g26270 OS=Arabidopsis thaliana GN=At1g26270 PE=1 SV=1
CL10026.Contig1_All	1071	203	10.5652	149	8.0123	gi|224054504|ref|XP_002298293.1|	511.9	7e-144	predicted protein [Populus trichocarpa] >gi|222845551|gb|EEE83098.1| predicted protein [Populus trichocarpa]	gi|449533069|ref|XM_004173452.1|	192	5e-46	PREDICTED: Cucumis sativus zinc finger CCCH domain-containing protein 53-like (LOC101204060), mRNA	sp|Q94CJ8|C3H55_ARATH	348	3e-96	Zinc finger CCCH domain-containing protein 55 OS=Arabidopsis thaliana GN=At5g12440 PE=2 SV=3
CL10027.Contig1_All	570	57	5.5741	64	6.4664	gi|224132944|ref|XP_002321448.1|	296.2	2e-79	predicted protein [Populus trichocarpa] >gi|222868444|gb|EEF05575.1| predicted protein [Populus trichocarpa]	gi|449524855|ref|XM_004169389.1|	125	5e-26	PREDICTED: Cucumis sativus uncharacterized LOC101216332 (LOC101216332), mRNA	--	--	--	--
CL10027.Contig2_All	550	49	4.966	40	4.1885	gi|224120646|ref|XP_002318382.1|	349	2e-95	predicted protein [Populus trichocarpa] >gi|222859055|gb|EEE96602.1| predicted protein [Populus trichocarpa]	gi|449524855|ref|XM_004169389.1|	85.7	4e-14	PREDICTED: Cucumis sativus uncharacterized LOC101216332 (LOC101216332), mRNA	--	--	--	--
CL10028.Contig1_All	1170	96	4.5736	161	7.925	gi|224141637|ref|XP_002324173.1|	296.6	5e-79	ZIP transporter [Populus trichocarpa] >gi|222865607|gb|EEF02738.1| ZIP transporter [Populus trichocarpa]	gi|157265597|gb|AC210137.1|	1687	0	Populus trichocarpa clone POP109-O13, complete sequence	sp|O04089|ZIP4_ARATH	260	1e-69	Zinc transporter 4, chloroplastic OS=Arabidopsis thaliana GN=ZIP4 PE=2 SV=1
CL10028.Contig2_All	2199	636	16.1214	603	15.7925	gi|224141637|ref|XP_002324173.1|	756.5	0	ZIP transporter [Populus trichocarpa] >gi|222865607|gb|EEF02738.1| ZIP transporter [Populus trichocarpa]	gi|224141636|ref|XM_002324137.1|	2401	0	Populus trichocarpa ZIP transporter, mRNA	sp|Q8LE59|IRT3_ARATH	541	8e-154	Fe(2+) transport protein 3, chloroplastic OS=Arabidopsis thaliana GN=IRT3 PE=2 SV=3
CL10029.Contig1_All	245	4	0.9101	0	0	--	--	--	--	gi|4008158|dbj|AB015601.1|	77.8	5e-12	Salix gilgiana SGJ3 mRNA for DnaJ homolog, complete cds	--	--	--	--
CL10029.Contig2_All	260	21	4.5021	27	5.9807	--	--	--	--	gi|4008158|dbj|AB015601.1|	109	1e-21	Salix gilgiana SGJ3 mRNA for DnaJ homolog, complete cds	--	--	--	--
CL10030.Contig1_All	223	12	2.9995	12	3.0991	--	--	--	--	gi|157824249|gb|AC211804.1|	71.9	3e-10	Populus trichocarpa clone POP017-B20, complete sequence	--	--	--	--
CL10031.Contig1_All	263	17	3.603	17	3.7227	--	--	--	--	--	--	--	--	--	--	--	--
CL10031.Contig2_All	705	185	14.627	173	14.1324	gi|224099833|ref|XP_002311637.1|	167.2	2e-40	predicted protein [Populus trichocarpa] >gi|222851457|gb|EEE89004.1| predicted protein [Populus trichocarpa]	gi|160955483|emb|CU225468.1|	307	8e-81	Populus EST from leave	--	--	--	--
CL10032.Contig1_All	588	52	4.9294	36	3.526	gi|224116306|ref|XP_002317265.1|	375.9	2e-103	predicted protein [Populus trichocarpa] >gi|222860330|gb|EEE97877.1| predicted protein [Populus trichocarpa]	gi|359496574|ref|XM_002271445.2|	149	4e-33	PREDICTED: Vitis vinifera uncharacterized LOC100263747 (LOC100263747), mRNA	--	--	--	--
CL10032.Contig2_All	238	21	4.9183	17	4.1137	gi|224116306|ref|XP_002317265.1|	139.8	1e-32	predicted protein [Populus trichocarpa] >gi|222860330|gb|EEE97877.1| predicted protein [Populus trichocarpa]	gi|356527954|ref|XM_003532523.1|	113	8e-23	PREDICTED: Glycine max uncharacterized protein LOC100815489 (LOC100815489), mRNA	--	--	--	--
CL10033.Contig1_All	342	20	3.2597	21	3.5363	gi|224094043|ref|XP_002310065.1|	97.1	9e-20	predicted protein [Populus trichocarpa] >gi|222852968|gb|EEE90515.1| predicted protein [Populus trichocarpa]	gi|159647955|gb|AC214101.1|	167	9e-39	Populus trichocarpa clone POP114-A12, complete sequence	--	--	--	--
CL10033.Contig2_All	226	14	3.453	13	3.3128	gi|224129544|ref|XP_002320612.1|	34.3	1e-09	predicted protein [Populus trichocarpa] >gi|222861385|gb|EEE98927.1| predicted protein [Populus trichocarpa]	gi|161789305|gb|AC215623.1|	145	2e-32	Populus trichocarpa clone POP004-A06, complete sequence	--	--	--	--
CL10034.Contig1_All	873	414	26.4337	352	23.2214	gi|224081785|ref|XP_002306491.1|	585.1	5e-166	cytochrome P450 [Populus trichocarpa] >gi|222855940|gb|EEE93487.1| cytochrome P450 [Populus trichocarpa]	gi|224081784|ref|XM_002306455.1|	1558	0	Populus trichocarpa cytochrome P450 (CYP81S9), mRNA	sp|P93147|C81E1_GLYEC	311	3e-85	Isoflavone 2'-hydroxylase OS=Glycyrrhiza echinata GN=CYP81E1 PE=1 SV=2
CL10034.Contig2_All	208	8	2.1439	15	4.1532	gi|224115092|ref|XP_002332235.1|	138.3	3e-32	cytochrome P450 [Populus trichocarpa] >gi|222831848|gb|EEE70325.1| cytochrome P450 [Populus trichocarpa]	gi|224115091|ref|XM_002332199.1|	396	1e-108	Populus trichocarpa cytochrome P450 (CYP81S12v1), mRNA	sp|Q9FG65|C81D1_ARATH	70.1	3e-13	Cytochrome P450 81D1 OS=Arabidopsis thaliana GN=CYP81D1 PE=2 SV=1
CL10035.Contig1_All	3017	1112	20.5448	1022	19.509	gi|224116018|ref|XP_002317186.1|	1467.2	0	predicted protein [Populus trichocarpa] >gi|222860251|gb|EEE97798.1| predicted protein [Populus trichocarpa]	gi|168480176|gb|AC217641.1|	4266	0	Populus trichocarpa clone POP028-E03, complete sequence	sp|Q84JR9|TTL4_ARATH	67	6e-11	TPR repeat-containing thioredoxin TTL4 OS=Arabidopsis thaliana GN=TTL4 PE=2 SV=1
CL10035.Contig2_All	400	181	25.2226	124	17.8534	gi|429326630|gb|AFZ78655.1|	267.3	5e-71	receptor kinase [Populus tomentosa]	gi|429326629|gb|JX986718.1|	761	0	Populus tomentosa receptor kinase gene, complete cds	--	--	--	--
CL10035.Contig3_All	856	212	13.8049	182	12.2449	gi|429326630|gb|AFZ78655.1|	474.6	9e-133	receptor kinase [Populus tomentosa]	gi|429326629|gb|JX986718.1|	1598	0	Populus tomentosa receptor kinase gene, complete cds	sp|Q84JR9|TTL4_ARATH	65.1	5e-11	TPR repeat-containing thioredoxin TTL4 OS=Arabidopsis thaliana GN=TTL4 PE=2 SV=1
CL10036.Contig1_All	1015	167	9.1711	162	9.192	gi|224107034|ref|XP_002314352.1|	390.6	2e-107	predicted protein [Populus trichocarpa] >gi|222863392|gb|EEF00523.1| predicted protein [Populus trichocarpa]	gi|164498901|gb|AC216412.1|	1719	0	Populus trichocarpa clone POP035-I15, complete sequence	sp|A7PZL3|PGLR_VITVI	171	5e-43	Probable polygalacturonase OS=Vitis vinifera GN=GSVIVT00026920001 PE=1 SV=1
CL10036.Contig2_All	988	118	6.6573	121	7.0532	gi|224130360|ref|XP_002328589.1|	412.1	7e-114	predicted protein [Populus trichocarpa] >gi|222838571|gb|EEE76936.1| predicted protein [Populus trichocarpa]	gi|164498901|gb|AC216412.1|	1108	0	Populus trichocarpa clone POP035-I15, complete sequence	sp|A7PZL3|PGLR_VITVI	170	1e-42	Probable polygalacturonase OS=Vitis vinifera GN=GSVIVT00026920001 PE=1 SV=1
CL10037.Contig1_All	923	301	18.1776	230	14.3511	gi|224141035|ref|XP_002323880.1|	506.1	3e-142	predicted protein [Populus trichocarpa] >gi|222866882|gb|EEF04013.1| predicted protein [Populus trichocarpa]	gi|123673911|emb|AM434350.1|	73.8	3e-10	Vitis vinifera, whole genome shotgun sequence, contig VV78X178339.3, clone ENTAV 115	--	--	--	--
CL10037.Contig2_All	711	106	8.3101	100	8.1001	gi|224077722|ref|XP_002305379.1|	369.4	3e-101	predicted protein [Populus trichocarpa] >gi|222848343|gb|EEE85890.1| predicted protein [Populus trichocarpa]	gi|17736901|dbj|AP004534.1|	65.9	5e-08	Lotus japonicus genomic DNA, chromosome 4, clone: LjT14P20, TM0087, complete sequence	--	--	--	--
CL10038.Contig1_All	577	45	4.3472	50	4.9906	gi|429326486|gb|AFZ78583.1|	399.4	1e-110	cellulose synthase-like protein [Populus tomentosa]	gi|429326485|gb|JX986646.1|	579	1e-162	Populus tomentosa clone C3 cellulose synthase-like protein gene, complete cds	sp|Q9ZQB9|CSLCC_ARATH	358	9e-100	Probable xyloglucan glycosyltransferase 12 OS=Arabidopsis thaliana GN=CSLC12 PE=1 SV=1
CL10038.Contig2_All	561	53	5.266	53	5.4409	gi|429326488|gb|AFZ78584.1|	385.2	3e-106	cellulose synthase-like protein [Populus tomentosa]	gi|429326487|gb|JX986647.1|	587	1e-165	Populus tomentosa clone C4 cellulose synthase-like protein gene, complete cds	sp|Q9ZQB9|CSLCC_ARATH	341	2e-94	Probable xyloglucan glycosyltransferase 12 OS=Arabidopsis thaliana GN=CSLC12 PE=1 SV=1
CL10039.Contig1_All	530	133	13.9877	107	11.627	gi|224139872|ref|XP_002323318.1|	207.2	1e-52	predicted protein [Populus trichocarpa] >gi|222867948|gb|EEF05079.1| predicted protein [Populus trichocarpa]	gi|224139871|ref|XM_002323282.1|	565	1e-158	Populus trichocarpa predicted protein, mRNA	--	--	--	--
CL10039.Contig2_All	479	130	15.1279	113	13.5863	gi|224087016|ref|XP_002308029.1|	203	1e-51	predicted protein [Populus trichocarpa] >gi|222854005|gb|EEE91552.1| predicted protein [Populus trichocarpa]	gi|224087015|ref|XM_002307993.1|	511	1e-142	Populus trichocarpa predicted protein, mRNA	--	--	--	--
CL1004.Contig1_All	706	72	5.6846	56	4.5682	gi|462419650|gb|EMJ23913.1|	65.1	1e-09	hypothetical protein PRUPE_ppa009901mg [Prunus persica]	gi|224099666|ref|XM_002311535.1|	119	4e-24	Populus trichocarpa predicted protein, mRNA	--	--	--	--
CL1004.Contig2_All	1543	4031	145.619	3879	144.781	gi|224099667|ref|XP_002311571.1|	592.8	5e-168	predicted protein [Populus trichocarpa] >gi|222851391|gb|EEE88938.1| predicted protein [Populus trichocarpa]	gi|470123220|ref|XM_004297579.1|	488	1e-135	PREDICTED: Fragaria vesca subsp. vesca inositol oxygenase 1-like (LOC101306622), mRNA	sp|Q8L799|MIOX1_ARATH	520	1e-147	Inositol oxygenase 1 OS=Arabidopsis thaliana GN=MIOX1 PE=2 SV=1
CL1004.Contig3_All	1403	46	1.8276	69	2.8324	gi|224122510|ref|XP_002330499.1|	624.4	1e-177	predicted protein [Populus trichocarpa] >gi|222872433|gb|EEF09564.1| predicted protein [Populus trichocarpa]	gi|359484518|ref|XM_002283083.2|	327	2e-86	PREDICTED: Vitis vinifera probable inositol oxygenase-like (LOC100254212), mRNA	sp|O82200|MIOX2_ARATH	479	2e-135	Inositol oxygenase 2 OS=Arabidopsis thaliana GN=MIOX2 PE=2 SV=2
CL1004.Contig4_All	1277	81	3.5356	179	8.0727	gi|224122510|ref|XP_002330499.1|	644.8	0	predicted protein [Populus trichocarpa] >gi|222872433|gb|EEF09564.1| predicted protein [Populus trichocarpa]	gi|359484518|ref|XM_002283083.2|	377	1e-101	PREDICTED: Vitis vinifera probable inositol oxygenase-like (LOC100254212), mRNA	sp|O82200|MIOX2_ARATH	499	1e-141	Inositol oxygenase 2 OS=Arabidopsis thaliana GN=MIOX2 PE=2 SV=2
CL1004.Contig5_All	239	10	2.3322	2	0.4819	--	--	--	--	gi|332002898|gb|CP002688.1|	60	1e-06	Arabidopsis thaliana chromosome 5, complete sequence	--	--	--	--
CL10040.Contig1_All	808	16	1.1038	11	0.784	gi|224123242|ref|XP_002319030.1|	217.6	1e-55	predicted protein [Populus trichocarpa] >gi|222857406|gb|EEE94953.1| predicted protein [Populus trichocarpa]	gi|359487716|ref|XM_003633588.1|	212	4e-52	PREDICTED: Vitis vinifera uncharacterized LOC100249532, transcript variant 2 (LOC100249532), mRNA	--	--	--	--
CL10040.Contig2_All	1104	346	17.4694	398	20.7622	gi|224123242|ref|XP_002319030.1|	483.4	2e-135	predicted protein [Populus trichocarpa] >gi|222857406|gb|EEE94953.1| predicted protein [Populus trichocarpa]	gi|359487716|ref|XM_003633588.1|	309	3e-81	PREDICTED: Vitis vinifera uncharacterized LOC100249532, transcript variant 2 (LOC100249532), mRNA	--	--	--	--
CL10041.Contig1_All	630	252	22.2962	222	20.2942	gi|297736252|emb|CBI24890.3|	227.3	1e-58	unnamed protein product [Vitis vinifera]	gi|160950236|emb|CU223087.1|	718	0	Populus EST from leave	sp|Q96499|RL44_GOSHI	220	6e-58	60S ribosomal protein L44 OS=Gossypium hirsutum GN=RPL44 PE=3 SV=3
CL10043.Contig1_All	732	363	27.6419	474	37.2929	gi|255587979|ref|XP_002534461.1|	206.1	4e-52	conserved hypothetical protein [Ricinus communis] >gi|223525247|gb|EEF27921.1| conserved hypothetical protein [Ricinus communis]	gi|160949980|emb|CU223017.1|	1174	0	Populus EST from leave	--	--	--	--
CL10043.Contig2_All	652	71	6.0699	40	3.5332	gi|224088390|ref|XP_002308437.1|	161	1e-38	predicted protein [Populus trichocarpa] >gi|222854413|gb|EEE91960.1| predicted protein [Populus trichocarpa]	gi|160949980|emb|CU223017.1|	809	0	Populus EST from leave	--	--	--	--
CL10044.Contig1_All	383	17	2.4741	24	3.6089	--	--	--	--	gi|256782832|gb|AC237586.1|	599	1e-169	Populus trichocarpa clone POP031-J10, complete sequence	--	--	--	--
CL10044.Contig2_All	399	30	4.191	25	3.6085	--	--	--	--	gi|256782832|gb|AC237586.1|	720	0	Populus trichocarpa clone POP031-J10, complete sequence	--	--	--	--
CL10045.Contig1_All	886	57	3.586	89	5.7852	gi|224136065|ref|XP_002322231.1|	431	1e-119	predicted protein [Populus trichocarpa] >gi|222869227|gb|EEF06358.1| predicted protein [Populus trichocarpa]	gi|158749690|gb|AC213420.1|	710	0	Populus trichocarpa clone POP033-D24, complete sequence	sp|P17815|MASY_RICCO	391	3e-109	Malate synthase, glyoxysomal OS=Ricinus communis PE=2 SV=1
CL10045.Contig2_All	1981	3118	87.733	2489	72.3602	gi|224136065|ref|XP_002322231.1|	1099	0	predicted protein [Populus trichocarpa] >gi|222869227|gb|EEF06358.1| predicted protein [Populus trichocarpa]	gi|21075|emb|X52806.1|	1100	0	Ricinus communis mRNA for malate synthase (EC 4.1.3.2)	sp|P17815|MASY_RICCO	1018	0	Malate synthase, glyoxysomal OS=Ricinus communis PE=2 SV=1
CL10046.Contig1_All	1874	351	10.4402	338	10.3874	gi|224097014|ref|XP_002310811.1|	45.4	0	predicted protein [Populus trichocarpa] >gi|222853714|gb|EEE91261.1| predicted protein [Populus trichocarpa]	gi|225430735|ref|XM_002266498.1|	753	0	PREDICTED: Vitis vinifera ATPase family AAA domain-containing protein 3-A-like (LOC100263248), mRNA	sp|Q9SAJ3|FTSHC_ARATH	59.3	4e-09	ATP-dependent zinc metalloprotease FTSH 12, chloroplastic OS=Arabidopsis thaliana GN=FTSH12 PE=2 SV=2
CL10046.Contig2_All	1379	73	2.9507	50	2.0882	gi|224133826|ref|XP_002327690.1|	171	2e-97	predicted protein [Populus trichocarpa] >gi|222836775|gb|EEE75168.1| predicted protein [Populus trichocarpa]	gi|356495405|ref|XM_003516521.1|	228	1e-56	PREDICTED: Glycine max ATPase family AAA domain-containing protein 3-like (LOC100776095), mRNA	--	--	--	--
CL10046.Contig3_All	669	120	9.9983	119	10.2442	gi|224097014|ref|XP_002310811.1|	34.7	1e-90	predicted protein [Populus trichocarpa] >gi|222853714|gb|EEE91261.1| predicted protein [Populus trichocarpa]	gi|225430735|ref|XM_002266498.1|	180	1e-42	PREDICTED: Vitis vinifera ATPase family AAA domain-containing protein 3-A-like (LOC100263248), mRNA	--	--	--	--
CL10047.Contig1_All	435	45	5.7663	35	4.6338	gi|225439920|ref|XP_002275244.1|	239.6	1e-62	PREDICTED: L-type lectin-domain containing receptor kinase VIII.1 [Vitis vinifera]	gi|357491802|ref|XM_003616141.1|	117	1e-23	Medicago truncatula Lectin receptor kinase-like protein (MTR_5g077100) mRNA, complete cds	sp|Q9LFH9|LRK81_ARATH	212	6e-56	L-type lectin-domain containing receptor kinase VIII.1 OS=Arabidopsis thaliana GN=LECRK81 PE=1 SV=1
CL10048.Contig1_All	607	786	72.1781	697	66.1307	gi|224114513|ref|XP_002316782.1|	171	1e-41	predicted protein [Populus trichocarpa] >gi|222859847|gb|EEE97394.1| predicted protein [Populus trichocarpa]	gi|160951393|emb|CU223696.1|	747	0	Populus EST from leave	sp|Q8GYN5|RIN4_ARATH	50.8	6e-07	RPM1-interacting protein 4 OS=Arabidopsis thaliana GN=RIN4 PE=1 SV=1
CL10048.Contig2_All	589	1379	130.503	1520	148.624	gi|224056477|ref|XP_002298875.1|	164.9	7e-40	predicted protein [Populus trichocarpa] >gi|222846133|gb|EEE83680.1| predicted protein [Populus trichocarpa]	gi|160951393|emb|CU223696.1|	408	1e-111	Populus EST from leave	sp|Q8GYN5|RIN4_ARATH	51.6	3e-07	RPM1-interacting protein 4 OS=Arabidopsis thaliana GN=RIN4 PE=1 SV=1
CL10049.Contig1_All	560	146	14.5324	155	15.9405	gi|224140413|ref|XP_002323577.1|	283.5	1e-75	predicted protein [Populus trichocarpa] >gi|222868207|gb|EEF05338.1| predicted protein [Populus trichocarpa]	gi|164498904|gb|AC216415.1|	882	0	Populus trichocarpa clone POP047-J03, complete sequence	sp|Q9M024|TAAC_ARATH	145	2e-35	Thylakoid ADP,ATP carrier protein, chloroplastic OS=Arabidopsis thaliana GN=TAAC PE=1 SV=1
CL1005.Contig1_All	582	419	40.1294	374	37.009	gi|224100613|ref|XP_002311946.1|	270.8	9e-72	predicted protein [Populus trichocarpa] >gi|222851766|gb|EEE89313.1| predicted protein [Populus trichocarpa]	gi|359486982|ref|XM_002265727.2|	61.9	7e-07	PREDICTED: Vitis vinifera uncharacterized LOC100252823 (LOC100252823), mRNA	--	--	--	--
CL1005.Contig2_All	595	310	29.0413	258	24.9725	gi|224113453|ref|XP_002316500.1|	266.2	2e-70	predicted protein [Populus trichocarpa] >gi|222865540|gb|EEF02671.1| predicted protein [Populus trichocarpa]	gi|359486982|ref|XM_002265727.2|	65.9	4e-08	PREDICTED: Vitis vinifera uncharacterized LOC100252823 (LOC100252823), mRNA	--	--	--	--
CL10050.Contig1_All	3255	549	9.4014	478	8.4574	gi|224124392|ref|XP_002319320.1|	2025.4	0	predicted protein [Populus trichocarpa] >gi|222857696|gb|EEE95243.1| predicted protein [Populus trichocarpa]	gi|470107865|ref|XM_004290211.1|	1025	0	PREDICTED: Fragaria vesca subsp. vesca probable sucrose-phosphate synthase 4-like (LOC101310276), mRNA	sp|F4JLK2|SPSA4_ARATH	1533	0	Probable sucrose-phosphate synthase 4 OS=Arabidopsis thaliana GN=SPS4 PE=1 SV=1
CL10050.Contig2_All	2129	182	4.765	73	1.9747	gi|224124392|ref|XP_002319320.1|	1130.2	0	predicted protein [Populus trichocarpa] >gi|222857696|gb|EEE95243.1| predicted protein [Populus trichocarpa]	gi|470107865|ref|XM_004290211.1|	797	0	PREDICTED: Fragaria vesca subsp. vesca probable sucrose-phosphate synthase 4-like (LOC101310276), mRNA	sp|F4JLK2|SPSA4_ARATH	907	0	Probable sucrose-phosphate synthase 4 OS=Arabidopsis thaliana GN=SPS4 PE=1 SV=1
CL10051.Contig1_All	924	118	7.1184	121	7.5418	gi|224129506|ref|XP_002320603.1|	577	1e-163	predicted protein [Populus trichocarpa] >gi|222861376|gb|EEE98918.1| predicted protein [Populus trichocarpa]	gi|158420586|gb|AC212921.1|	718	0	Populus trichocarpa clone POP003-O05, complete sequence	sp|Q56W64|ASPG3_ARATH	432	1e-121	Probable isoaspartyl peptidase/L-asparaginase 3 OS=Arabidopsis thaliana GN=At5g61540 PE=2 SV=1
CL10051.Contig2_All	290	17	3.2676	7	1.3901	gi|224129506|ref|XP_002320603.1|	184.5	4e-46	predicted protein [Populus trichocarpa] >gi|222861376|gb|EEE98918.1| predicted protein [Populus trichocarpa]	gi|158420586|gb|AC212921.1|	404	1e-110	Populus trichocarpa clone POP003-O05, complete sequence	sp|Q56W64|ASPG3_ARATH	142	4e-35	Probable isoaspartyl peptidase/L-asparaginase 3 OS=Arabidopsis thaliana GN=At5g61540 PE=2 SV=1
CL10052.Contig1_All	371	30	4.5073	22	3.4151	gi|301117468|ref|XP_002906462.1|	193.7	7e-49	Rab1 family GTPase (PiYpt1) [Phytophthora infestans T30-4] >gi|2500076|sp|Q01890.1|YPT1_PHYIN RecName: Full=Ras-like GTP-binding protein YPT1 >gi|940432|gb|AAB40355.1| ras related protein PiYpt1 [Phytophthora infestans] >gi|262107811|gb|EEY65863.1| Rab1 family GTPase (PiYpt1) [Phytophthora infestans T30-4]	gi|470128838|ref|XM_004300293.1|	111	5e-22	PREDICTED: Fragaria vesca subsp. vesca GTP-binding protein YPTM2-like (LOC101314664), mRNA	sp|Q01890|YPT1_PHYIN	193	2e-50	Ras-like GTP-binding protein YPT1 OS=Phytophthora infestans GN=YPT1 PE=3 SV=1
CL10052.Contig2_All	204	0	0	7	1.9762	gi|32401324|gb|AAP80834.1|	136.7	1e-31	GTP-binding protein [Griffithsia japonica]	gi|301117467|ref|XM_002906416.1|	101	3e-19	Phytophthora infestans T30-4 Rab1 family GTPase (PiYpt1) (PITG_03392) mRNA, complete cds	sp|Q01890|YPT1_PHYIN	136	2e-33	Ras-like GTP-binding protein YPT1 OS=Phytophthora infestans GN=YPT1 PE=3 SV=1
CL10052.Contig3_All	248	14	3.1466	10	2.3222	gi|428184966|gb|EKX53820.1|	155.6	2e-37	hypothetical protein GUITHDRAFT_150303 [Guillardia theta CCMP2712]	gi|224001285|ref|XM_002290279.1|	113	8e-23	Thalassiosira pseudonana CCMP1335 ypt1-like rab-type small G protein, mRNA	sp|Q01890|YPT1_PHYIN	153	3e-38	Ras-like GTP-binding protein YPT1 OS=Phytophthora infestans GN=YPT1 PE=3 SV=1
CL10053.Contig1_All	319	25	4.3684	14	2.5275	gi|224069844|ref|XP_002326428.1|	114.4	5e-25	ZIP transporter [Populus trichocarpa] >gi|222833621|gb|EEE72098.1| ZIP transporter [Populus trichocarpa]	gi|224139413|ref|XM_002323064.1|	240	7e-61	Populus trichocarpa ZIP transporter, mRNA	sp|Q9C9Z1|ZTP50_ARATH	79.3	5e-16	Putative zinc transporter At3g08650 OS=Arabidopsis thaliana GN=At3g08650 PE=2 SV=2
CL10053.Contig2_All	2559	340	7.4059	303	6.8192	gi|224069844|ref|XP_002326428.1|	1166.8	0	ZIP transporter [Populus trichocarpa] >gi|222833621|gb|EEE72098.1| ZIP transporter [Populus trichocarpa]	gi|224069843|ref|XM_002326392.1|	3374	0	Populus trichocarpa ZIP transporter, mRNA	sp|Q940Q3|ZTP29_ARATH	72.4	1e-12	Zinc transporter ZTP29 OS=Arabidopsis thaliana GN=ZTP29 PE=2 SV=1
CL10054.Contig1_All	741	69	5.1904	84	6.5286	gi|224108221|ref|XP_002314765.1|	473.4	1e-132	histidine kinase cytokinin receptor [Populus trichocarpa] >gi|190148365|gb|ACE63265.1| cytokinin receptor 1B [Populus trichocarpa] >gi|222863805|gb|EEF00936.1| histidine kinase cytokinin receptor [Populus trichocarpa]	gi|190148364|gb|EU583461.1|	1342	0	Populus trichocarpa cytokinin receptor 1B (CRE1B) mRNA, complete cds	sp|Q9C5U0|AHK4_ARATH	290	8e-79	Histidine kinase 4 OS=Arabidopsis thaliana GN=AHK4 PE=1 SV=1
CL10054.Contig2_All	206	9	2.4353	10	2.7957	gi|224101927|ref|XP_002312478.1|	124.4	5e-28	histidine kinase cytokinin receptor [Populus trichocarpa] >gi|222852298|gb|EEE89845.1| histidine kinase cytokinin receptor [Populus trichocarpa]	gi|224101926|ref|XM_002312442.1|	367	3e-99	Populus trichocarpa histidine kinase cytokinin receptor, mRNA	sp|Q9C5U0|AHK4_ARATH	74.7	1e-14	Histidine kinase 4 OS=Arabidopsis thaliana GN=AHK4 PE=1 SV=1
CL10055.Contig1_All	698	778	62.1292	878	72.4433	gi|118487864|gb|ABK95755.1|	294.7	9e-79	unknown [Populus trichocarpa]	gi|160951460|emb|CU223763.1|	1223	0	Populus EST from leave	sp|O22795|RK28_ARATH	198	3e-51	50S ribosomal protein L28, chloroplastic OS=Arabidopsis thaliana GN=RPL28 PE=2 SV=2
CL10055.Contig2_All	578	44	4.2432	114	11.3589	gi|118489930|gb|ABK96762.1|	290	1e-77	unknown [Populus trichocarpa x Populus deltoides]	gi|160951460|emb|CU223763.1|	1027	0	Populus EST from leave	sp|O22795|RK28_ARATH	198	2e-51	50S ribosomal protein L28, chloroplastic OS=Arabidopsis thaliana GN=RPL28 PE=2 SV=2
CL10056.Contig1_All	813	166	11.3812	219	15.5136	gi|224067856|ref|XP_002302567.1|	327.4	1e-88	predicted protein [Populus trichocarpa] >gi|222844293|gb|EEE81840.1| predicted protein [Populus trichocarpa]	gi|160953875|emb|CU224730.1|	258	8e-66	Populus EST from leave	--	--	--	--
CL10056.Contig2_All	676	217	17.8931	198	16.8685	gi|224130196|ref|XP_002320776.1|	326.6	2e-88	predicted protein [Populus trichocarpa] >gi|222861549|gb|EEE99091.1| predicted protein [Populus trichocarpa]	gi|160953875|emb|CU224730.1|	147	2e-32	Populus EST from leave	--	--	--	--
CL10057.Contig1_All	1197	209	9.7325	216	10.3925	gi|224139422|ref|XP_002323104.1|	429.1	7e-119	predicted protein [Populus trichocarpa] >gi|222867734|gb|EEF04865.1| predicted protein [Populus trichocarpa]	gi|224139421|ref|XM_002323068.1|	1233	0	Populus trichocarpa predicted protein, mRNA	sp|P85192|UP1_HELAN	70.5	2e-12	Unknown protein 1 OS=Helianthus annuus PE=1 SV=1
CL10057.Contig2_All	479	0	0	6	0.7214	gi|224139422|ref|XP_002323104.1|	229.9	1e-59	predicted protein [Populus trichocarpa] >gi|222867734|gb|EEF04865.1| predicted protein [Populus trichocarpa]	gi|224139421|ref|XM_002323068.1|	644	0	Populus trichocarpa predicted protein, mRNA	--	--	--	--
CL10058.Contig1_All	1005	520	28.8409	395	22.6355	gi|224112467|ref|XP_002316201.1|	399.1	6e-110	predicted protein [Populus trichocarpa] >gi|222865241|gb|EEF02372.1| predicted protein [Populus trichocarpa]	gi|449499115|ref|XM_004160678.1|	498	1e-138	PREDICTED: Cucumis sativus clathrin heavy chain 1-like (LOC101222626), mRNA	sp|Q0WLB5|CLAH2_ARATH	353	9e-98	Clathrin heavy chain 2 OS=Arabidopsis thaliana GN=CHC2 PE=1 SV=1
CL10058.Contig2_All	1019	327	17.8873	239	13.5077	gi|224112467|ref|XP_002316201.1|	396	5e-109	predicted protein [Populus trichocarpa] >gi|222865241|gb|EEF02372.1| predicted protein [Populus trichocarpa]	gi|449499115|ref|XM_004160678.1|	490	1e-135	PREDICTED: Cucumis sativus clathrin heavy chain 1-like (LOC101222626), mRNA	sp|Q0WLB5|CLAH2_ARATH	350	8e-97	Clathrin heavy chain 2 OS=Arabidopsis thaliana GN=CHC2 PE=1 SV=1
CL10058.Contig3_All	337	10	1.654	10	1.7089	--	--	--	--	gi|224098696|ref|XM_002311202.1|	139	2e-30	Populus trichocarpa predicted protein, mRNA	--	--	--	--
CL10059.Contig1_All	1034	308	16.6036	399	22.2235	gi|224138892|ref|XP_002326716.1|	335.5	9e-91	predicted protein [Populus trichocarpa] >gi|222834038|gb|EEE72515.1| predicted protein [Populus trichocarpa]	gi|470128647|ref|XM_004300200.1|	93.7	3e-16	PREDICTED: Fragaria vesca subsp. vesca uncharacterized LOC101311379 (LOC101311379), mRNA	--	--	--	--
CL10059.Contig2_All	1027	269	14.6	259	14.5241	gi|224126295|ref|XP_002329519.1|	319.3	6e-86	predicted protein [Populus trichocarpa] >gi|222870228|gb|EEF07359.1| predicted protein [Populus trichocarpa]	gi|470128647|ref|XM_004300200.1|	93.7	3e-16	PREDICTED: Fragaria vesca subsp. vesca uncharacterized LOC101311379 (LOC101311379), mRNA	--	--	--	--
CL1006.Contig1_All	1365	366	14.9458	312	13.1638	gi|224077280|ref|XP_002305198.1|	691	0	DELLA domain GRAS family transcription factor [Populus trichocarpa] >gi|222848162|gb|EEE85709.1| DELLA domain GRAS family transcription factor [Populus trichocarpa]	gi|224077279|ref|XM_002305162.1|	2016	0	Populus trichocarpa DELLA domain GRAS family transcription factor (GRAS85), mRNA	sp|Q84TQ7|GAI_GOSHI	370	8e-103	DELLA protein GAI OS=Gossypium hirsutum GN=GAI PE=2 SV=1
CL1006.Contig2_All	731	243	18.5294	218	17.1751	gi|224069420|ref|XP_002302975.1|	465.3	4e-130	DELLA domain GRAS family transcription factor rga-like protein [Populus trichocarpa] >gi|222844701|gb|EEE82248.1| DELLA domain GRAS family transcription factor rga-like protein [Populus trichocarpa]	gi|224069419|ref|XM_002302939.1|	1358	0	Populus trichocarpa DELLA domain GRAS family transcription factor rga-like protein (GRAS87), mRNA	sp|Q84TQ7|GAI_GOSHI	265	3e-71	DELLA protein GAI OS=Gossypium hirsutum GN=GAI PE=2 SV=1
CL1006.Contig3_All	1331	238	9.9671	174	7.5289	gi|224077280|ref|XP_002305198.1|	678.3	0	DELLA domain GRAS family transcription factor [Populus trichocarpa] >gi|222848162|gb|EEE85709.1| DELLA domain GRAS family transcription factor [Populus trichocarpa]	gi|224077279|ref|XM_002305162.1|	1907	0	Populus trichocarpa DELLA domain GRAS family transcription factor (GRAS85), mRNA	sp|Q84TQ7|GAI_GOSHI	372	3e-103	DELLA protein GAI OS=Gossypium hirsutum GN=GAI PE=2 SV=1
CL10060.Contig1_All	757	27	1.9881	19	1.4455	gi|224072387|ref|XP_002303711.1|	210.7	2e-53	predicted protein [Populus trichocarpa] >gi|222841143|gb|EEE78690.1| predicted protein [Populus trichocarpa]	gi|160951521|emb|CU223824.1|	478	1e-132	Populus EST from leave	--	--	--	--
CL10060.Contig2_All	685	12	0.9765	11	0.9248	gi|224072387|ref|XP_002303711.1|	178.7	7e-44	predicted protein [Populus trichocarpa] >gi|222841143|gb|EEE78690.1| predicted protein [Populus trichocarpa]	gi|160951521|emb|CU223824.1|	478	1e-132	Populus EST from leave	--	--	--	--
CL10061.Contig1_All	517	30	3.2345	24	2.6735	gi|224061535|ref|XP_002300528.1|	300.4	8e-81	predicted protein [Populus trichocarpa] >gi|222847786|gb|EEE85333.1| predicted protein [Populus trichocarpa]	gi|47900629|gb|AC149298.1|	365	3e-98	Populus trichocarpa clone Pop1-021H24, complete sequence	--	--	--	--
CL10061.Contig2_All	567	26	2.556	49	4.9771	gi|224061535|ref|XP_002300528.1|	55.8	6e-74	predicted protein [Populus trichocarpa] >gi|222847786|gb|EEE85333.1| predicted protein [Populus trichocarpa]	gi|47900629|gb|AC149298.1|	436	1e-119	Populus trichocarpa clone Pop1-021H24, complete sequence	--	--	--	--
CL10062.Contig1_All	1530	471	17.1594	424	15.96	gi|224059526|ref|XP_002299890.1|	754.6	0	predicted protein [Populus trichocarpa] >gi|222847148|gb|EEE84695.1| predicted protein [Populus trichocarpa]	gi|225435059|ref|XM_002281367.1|	331	1e-87	PREDICTED: Vitis vinifera uncharacterized LOC100260456 (LOC100260456), mRNA	--	--	--	--
CL10062.Contig2_All	1010	152	8.3887	161	9.1804	gi|224106527|ref|XP_002314197.1|	649.4	0	predicted protein [Populus trichocarpa] >gi|222850605|gb|EEE88152.1| predicted protein [Populus trichocarpa]	gi|225435059|ref|XM_002281367.1|	319	3e-84	PREDICTED: Vitis vinifera uncharacterized LOC100260456 (LOC100260456), mRNA	--	--	--	--
CL10063.Contig1_All	808	738	50.9116	755	53.8139	gi|224125150|ref|XP_002319512.1|	343.2	2e-93	predicted protein [Populus trichocarpa] >gi|222857888|gb|EEE95435.1| predicted protein [Populus trichocarpa]	gi|158341698|gb|AC212844.1|	805	0	Populus trichocarpa clone POP021-P07, complete sequence	--	--	--	--
CL10063.Contig2_All	1509	1691	62.4634	1466	55.9505	gi|224123624|ref|XP_002330167.1|	836.6	0	predicted protein [Populus trichocarpa] >gi|222871623|gb|EEF08754.1| predicted protein [Populus trichocarpa]	gi|359487650|ref|XM_002279506.2|	371	1e-99	PREDICTED: Vitis vinifera uncharacterized LOC100251003 (LOC100251003), mRNA	--	--	--	--
CL10064.Contig1_All	272	124	25.4112	134	28.3723	--	--	--	--	gi|160950198|emb|CU223049.1|	525	1e-147	Populus EST from leave	--	--	--	--
CL10064.Contig2_All	796	1503	105.249	1308	94.6355	gi|224134394|ref|XP_002321809.1|	332	6e-90	predicted protein [Populus trichocarpa] >gi|222868805|gb|EEF05936.1| predicted protein [Populus trichocarpa]	gi|160954786|emb|CU225200.1|	961	0	Populus EST from leave	sp|Q9SA16|P2A09_ARATH	138	4e-33	Protein PHLOEM PROTEIN 2-LIKE A9 OS=Arabidopsis thaliana GN=PP2A9 PE=2 SV=1
CL10065.Contig1_All	1098	15	0.7615	12	0.6294	gi|224109842|ref|XP_002315330.1|	577	1e-163	predicted protein [Populus trichocarpa] >gi|222864370|gb|EEF01501.1| predicted protein [Populus trichocarpa]	gi|160958942|emb|CU232443.1|	658	0	Populus EST from mild drought-stressed leaves	sp|Q03250|RBG7_ARATH	127	1e-29	Glycine-rich RNA-binding protein 7 OS=Arabidopsis thaliana GN=RBG7 PE=1 SV=1
CL10065.Contig2_All	1155	138	6.6599	136	6.7813	gi|224109842|ref|XP_002315330.1|	595.1	7e-169	predicted protein [Populus trichocarpa] >gi|222864370|gb|EEF01501.1| predicted protein [Populus trichocarpa]	gi|160958942|emb|CU232443.1|	728	0	Populus EST from mild drought-stressed leaves	sp|Q03250|RBG7_ARATH	127	9e-30	Glycine-rich RNA-binding protein 7 OS=Arabidopsis thaliana GN=RBG7 PE=1 SV=1
CL10065.Contig3_All	1016	632	34.6733	583	33.0472	gi|224109842|ref|XP_002315330.1|	548.9	5e-155	predicted protein [Populus trichocarpa] >gi|222864370|gb|EEF01501.1| predicted protein [Populus trichocarpa]	gi|160958942|emb|CU232443.1|	270	3e-69	Populus EST from mild drought-stressed leaves	sp|P49310|GRP1_SINAL	122	3e-28	Glycine-rich RNA-binding protein GRP1A OS=Sinapis alba PE=2 SV=1
CL10065.Contig4_All	1047	225	11.9786	211	11.6063	gi|224109842|ref|XP_002315330.1|	593.6	1e-168	predicted protein [Populus trichocarpa] >gi|222864370|gb|EEF01501.1| predicted protein [Populus trichocarpa]	gi|160958942|emb|CU232443.1|	644	0	Populus EST from mild drought-stressed leaves	sp|Q03250|RBG7_ARATH	127	8e-30	Glycine-rich RNA-binding protein 7 OS=Arabidopsis thaliana GN=RBG7 PE=1 SV=1
CL10066.Contig1_All	2178	587	15.0228	557	14.7284	gi|224069565|ref|XP_002303000.1|	1151.7	0	predicted protein [Populus trichocarpa] >gi|222844726|gb|EEE82273.1| predicted protein [Populus trichocarpa]	gi|157426994|gb|AC210651.1|	1756	0	Populus trichocarpa clone POP051-P08, complete sequence	sp|Q9C9N6|PMI2_ARATH	411	7e-115	Protein PLASTID MOVEMENT IMPAIRED 2 OS=Arabidopsis thaliana GN=PMI2 PE=1 SV=1
CL10066.Contig2_All	341	13	2.125	21	3.5467	gi|224069565|ref|XP_002303000.1|	86.3	1e-16	predicted protein [Populus trichocarpa] >gi|222844726|gb|EEE82273.1| predicted protein [Populus trichocarpa]	gi|157426994|gb|AC210651.1|	226	1e-56	Populus trichocarpa clone POP051-P08, complete sequence	--	--	--	--
CL10067.Contig1_All	635	31	2.7212	28	2.5395	gi|224065581|ref|XP_002301868.1|	244.2	1e-63	predicted protein [Populus trichocarpa] >gi|222843594|gb|EEE81141.1| predicted protein [Populus trichocarpa]	gi|352091099|gb|JF733783.1|	369	2e-99	Dimocarpus longan flavodoxin family protein (FLD-1) mRNA, complete cds	sp|Q8RXN5|TYW1_ARATH	214	4e-56	tRNA wybutosine-synthesizing protein 1 homolog OS=Arabidopsis thaliana GN=TYW1 PE=2 SV=1
CL10067.Contig2_All	1765	484	15.2852	402	13.1172	gi|224065581|ref|XP_002301868.1|	971.1	0	predicted protein [Populus trichocarpa] >gi|222843594|gb|EEE81141.1| predicted protein [Populus trichocarpa]	gi|352091099|gb|JF733783.1|	981	0	Dimocarpus longan flavodoxin family protein (FLD-1) mRNA, complete cds	sp|Q8H8N3|TYW1_ORYSJ	786	0	tRNA wybutosine-synthesizing protein 1 homolog OS=Oryza sativa subsp. japonica GN=TYW1 PE=2 SV=1
CL10068.Contig1_All	1408	2513	99.4859	1905	77.9205	gi|224075517|ref|XP_002304662.1|	528.5	1e-148	NAC domain protein, IPR003441 [Populus trichocarpa] >gi|222842094|gb|EEE79641.1| NAC domain protein, IPR003441 [Populus trichocarpa]	gi|224075516|ref|XM_002304626.1|	2321	0	Populus trichocarpa NAC domain protein, IPR003441 (NAC052), mRNA	sp|Q8H4S4|NAC10_ORYSJ	199	2e-51	NAC transcription factor ONAC010 OS=Oryza sativa subsp. japonica GN=ONAC010 PE=2 SV=1
CL10068.Contig2_All	1664	2522	84.4818	2548	88.1871	gi|224053533|ref|XP_002297860.1|	523.1	5e-147	NAC domain protein, IPR003441 [Populus trichocarpa] >gi|222845118|gb|EEE82665.1| NAC domain protein, IPR003441 [Populus trichocarpa]	gi|224053532|ref|XM_002297824.1|	1659	0	Populus trichocarpa NAC domain protein, IPR003441 (NAC053), mRNA	sp|Q8H4S4|NAC10_ORYSJ	196	3e-50	NAC transcription factor ONAC010 OS=Oryza sativa subsp. japonica GN=ONAC010 PE=2 SV=1
CL10069.Contig1_All	2281	253	6.1825	245	6.1859	gi|224131430|ref|XP_002328537.1|	1139	0	predicted protein [Populus trichocarpa] >gi|222838252|gb|EEE76617.1| predicted protein [Populus trichocarpa]	gi|160957109|emb|CU231318.1|	735	0	Populus EST from mild drought-stressed leaves	sp|Q9M7J4|MFP1_TOBAC	100	3e-21	MAR-binding filament-like protein 1-1 OS=Nicotiana tabacum GN=MFP1-1 PE=2 SV=1
CL10069.Contig2_All	2266	18	0.4428	15	0.3812	gi|224131430|ref|XP_002328537.1|	1139	0	predicted protein [Populus trichocarpa] >gi|222838252|gb|EEE76617.1| predicted protein [Populus trichocarpa]	gi|160957109|emb|CU231318.1|	735	0	Populus EST from mild drought-stressed leaves	sp|Q9M7J4|MFP1_TOBAC	100	3e-21	MAR-binding filament-like protein 1-1 OS=Nicotiana tabacum GN=MFP1-1 PE=2 SV=1
CL10069.Contig3_All	2504	2381	53.0025	2119	48.7367	gi|224131430|ref|XP_002328537.1|	909.4	0	predicted protein [Populus trichocarpa] >gi|222838252|gb|EEE76617.1| predicted protein [Populus trichocarpa]	gi|160952763|emb|CU229753.1|	359	9e-96	Populus EST from mild drought-stressed leaves	sp|Q9LFE4|Y5673_ARATH	95.1	2e-19	WEB family protein At5g16730, chloroplastic OS=Arabidopsis thaliana GN=At5g16730 PE=1 SV=1
CL1007.Contig1_All	1935	3925	113.066	3392	100.956	gi|224130716|ref|XP_002320910.1|	805.8	0	predicted protein [Populus trichocarpa] >gi|222861683|gb|EEE99225.1| predicted protein [Populus trichocarpa]	gi|160950250|emb|CU223101.1|	1429	0	Populus EST from leave	sp|O81916|YC22_ARATH	592	3e-169	Uncharacterized calcium-binding protein At1g02270 OS=Arabidopsis thaliana GN=At1g02270 PE=2 SV=2
CL1007.Contig2_All	820	473	32.1528	382	26.8293	gi|224130716|ref|XP_002320910.1|	396	3e-109	predicted protein [Populus trichocarpa] >gi|222861683|gb|EEE99225.1| predicted protein [Populus trichocarpa]	gi|225453681|ref|XM_002268894.1|	192	4e-46	PREDICTED: Vitis vinifera uncharacterized LOC100247268 (LOC100247268), mRNA	sp|O81916|YC22_ARATH	234	4e-62	Uncharacterized calcium-binding protein At1g02270 OS=Arabidopsis thaliana GN=At1g02270 PE=2 SV=2
CL1007.Contig3_All	634	232	20.3972	251	22.8005	gi|224068224|ref|XP_002302684.1|	233.8	1e-60	predicted protein [Populus trichocarpa] >gi|222844410|gb|EEE81957.1| predicted protein [Populus trichocarpa]	gi|123698946|emb|AM483437.1|	77.8	1e-11	Vitis vinifera, whole genome shotgun sequence, contig VV78X127436.12, clone ENTAV 115	sp|O81916|YC22_ARATH	122	2e-28	Uncharacterized calcium-binding protein At1g02270 OS=Arabidopsis thaliana GN=At1g02270 PE=2 SV=2
CL10070.Contig1_All	1144	206	10.0372	157	7.9037	gi|224108129|ref|XP_002314731.1|	415.6	7e-115	predicted protein [Populus trichocarpa] >gi|222863771|gb|EEF00902.1| predicted protein [Populus trichocarpa]	gi|225424743|ref|XM_002266186.1|	260	3e-66	PREDICTED: Vitis vinifera serine/threonine-protein kinase PBS1-like (LOC100251958), mRNA	sp|Q8GX23|PERK5_ARATH	108	4e-24	Proline-rich receptor-like protein kinase PERK5 OS=Arabidopsis thaliana GN=PERK5 PE=2 SV=1
CL10070.Contig2_All	491	19	2.157	14	1.6421	gi|224111312|ref|XP_002315811.1|	265.4	2e-70	predicted protein [Populus trichocarpa] >gi|222864851|gb|EEF01982.1| predicted protein [Populus trichocarpa]	gi|225424743|ref|XM_002266186.1|	283	8e-74	PREDICTED: Vitis vinifera serine/threonine-protein kinase PBS1-like (LOC100251958), mRNA	sp|Q8GX23|PERK5_ARATH	114	3e-26	Proline-rich receptor-like protein kinase PERK5 OS=Arabidopsis thaliana GN=PERK5 PE=2 SV=1
CL10071.Contig1_All	248	60	13.4856	57	13.2368	--	--	--	--	gi|224085496|ref|XM_002307559.1|	196	7e-48	Populus trichocarpa f-box family protein, mRNA	--	--	--	--
CL10071.Contig2_All	317	37	6.506	24	4.3602	--	--	--	--	gi|224085496|ref|XM_002307559.1|	472	1e-130	Populus trichocarpa f-box family protein, mRNA	--	--	--	--
CL10072.Contig1_All	987	352	19.8791	462	26.9578	gi|224104009|ref|XP_002313280.1|	469.2	4e-131	predicted protein [Populus trichocarpa] >gi|118482298|gb|ABK93076.1| unknown [Populus trichocarpa] >gi|222849688|gb|EEE87235.1| predicted protein [Populus trichocarpa]	gi|335330047|gb|GU287235.1|	505	1e-140	Populus balsamifera isolate STO11 haplotype B 60S ribosomal protein L6 (RPL6C) gene, partial sequence	sp|P34091|RL6_MESCR	396	9e-111	60S ribosomal protein L6 OS=Mesembryanthemum crystallinum GN=RPL6 PE=2 SV=1
CL10072.Contig2_All	1106	544	27.4167	460	23.9531	gi|224104009|ref|XP_002313280.1|	469.2	5e-131	predicted protein [Populus trichocarpa] >gi|118482298|gb|ABK93076.1| unknown [Populus trichocarpa] >gi|222849688|gb|EEE87235.1| predicted protein [Populus trichocarpa]	gi|335330047|gb|GU287235.1|	505	1e-140	Populus balsamifera isolate STO11 haplotype B 60S ribosomal protein L6 (RPL6C) gene, partial sequence	sp|P34091|RL6_MESCR	396	1e-110	60S ribosomal protein L6 OS=Mesembryanthemum crystallinum GN=RPL6 PE=2 SV=1
CL10072.Contig3_All	537	1472	152.794	1470	157.653	gi|224059670|ref|XP_002299962.1|	253.4	1e-66	predicted protein [Populus trichocarpa] >gi|222847220|gb|EEE84767.1| predicted protein [Populus trichocarpa]	gi|349715860|emb|FQ387152.1|	172	2e-40	Vitis vinifera clone SS0AEB27YI08	sp|P34091|RL6_MESCR	234	2e-62	60S ribosomal protein L6 OS=Mesembryanthemum crystallinum GN=RPL6 PE=2 SV=1
CL10073.Contig1_All	616	231	20.9027	212	19.8205	gi|224111018|ref|XP_002315717.1|	257.3	1e-67	ethylene receptor 2 [Populus trichocarpa] >gi|222864757|gb|EEF01888.1| ethylene receptor 2 [Populus trichocarpa]	gi|224111017|ref|XM_002315681.1|	708	0	Populus trichocarpa ethylene receptor 2 (ETR2), mRNA	sp|Q0WPQ2|ETR2_ARATH	179	1e-45	Ethylene receptor 2 OS=Arabidopsis thaliana GN=ETR2 PE=1 SV=2
CL10073.Contig2_All	778	334	23.9298	277	20.505	gi|224099905|ref|XP_002311669.1|	256.9	2e-67	ethylene receptor 5 [Populus trichocarpa] >gi|222851489|gb|EEE89036.1| ethylene receptor 5 [Populus trichocarpa]	gi|224099904|ref|XM_002311633.1|	793	0	Populus trichocarpa ethylene receptor 5 (ETR5), mRNA	sp|Q0WPQ2|ETR2_ARATH	187	4e-48	Ethylene receptor 2 OS=Arabidopsis thaliana GN=ETR2 PE=1 SV=2
CL10074.Contig1_All	420	35	4.645	22	3.0167	--	--	--	--	--	--	--	--	--	--	--	--
CL10074.Contig2_All	200	6	1.6722	14	4.0314	--	--	--	--	--	--	--	--	--	--	--	--
CL10075.Contig1_All	1571	1190	42.2223	1223	44.8342	gi|255576657|ref|XP_002529218.1|	799.3	0	methionine aminopeptidase, putative [Ricinus communis] >gi|223531336|gb|EEF33174.1| methionine aminopeptidase, putative [Ricinus communis]	gi|225453697|ref|XM_002270425.1|	1120	0	PREDICTED: Vitis vinifera methionine aminopeptidase 2B-like (LOC100242047), mRNA	sp|Q56Y85|AMP2B_ARATH	762	0	Methionine aminopeptidase 2B OS=Arabidopsis thaliana GN=MAP2B PE=2 SV=2
CL10076.Contig1_All	307	324	58.8272	377	70.7232	gi|224054578|ref|XP_002298330.1|	83.2	1e-15	tubulin beta chain [Populus trichocarpa] >gi|222845588|gb|EEE83135.1| tubulin beta chain [Populus trichocarpa]	gi|224054577|ref|XM_002298294.1|	529	1e-148	Populus trichocarpa tubulin beta chain (TUB1), mRNA	sp|Q9ASR0|TBB3_ARATH	72.8	4e-14	Tubulin beta-3 chain OS=Arabidopsis thaliana GN=TUBB3 PE=2 SV=2
CL10077.Contig1_All	1073	3210	166.754	5554	298.102	gi|1015937|emb|CAA62943.1|	345.1	1e-93	extensin class 1 protein [Vigna unguiculata]	gi|19229|emb|X55685.1|	297	1e-77	Tomato extensin mRNA (clone uG-18)	sp|P06599|EXTN_DAUCA	273	1e-73	Extensin OS=Daucus carota PE=2 SV=1
CL10078.Contig1_All	1445	76	2.9317	72	2.8696	gi|224107297|ref|XP_002314437.1|	615.9	5e-175	predicted protein [Populus trichocarpa] >gi|222863477|gb|EEF00608.1| predicted protein [Populus trichocarpa]	gi|359477456|ref|XM_002278583.2|	218	1e-53	PREDICTED: Vitis vinifera uncharacterized LOC100252741 (LOC100252741), mRNA	sp|Q93W28|Y4554_ARATH	400	8e-112	Uncharacterized protein At4g15545 OS=Arabidopsis thaliana GN=At4g15545 PE=1 SV=1
CL10078.Contig2_All	1449	108	4.1546	134	5.3259	gi|224107297|ref|XP_002314437.1|	615.9	5e-175	predicted protein [Populus trichocarpa] >gi|222863477|gb|EEF00608.1| predicted protein [Populus trichocarpa]	gi|359477456|ref|XM_002278583.2|	218	1e-53	PREDICTED: Vitis vinifera uncharacterized LOC100252741 (LOC100252741), mRNA	sp|Q93W28|Y4554_ARATH	400	8e-112	Uncharacterized protein At4g15545 OS=Arabidopsis thaliana GN=At4g15545 PE=1 SV=1
CL10078.Contig3_All	1637	791	26.9339	1034	36.3773	gi|224107297|ref|XP_002314437.1|	614	2e-174	predicted protein [Populus trichocarpa] >gi|222863477|gb|EEF00608.1| predicted protein [Populus trichocarpa]	gi|157265592|gb|AC210132.1|	361	2e-96	Populus trichocarpa clone POP011-D09, complete sequence	sp|Q93W28|Y4554_ARATH	400	1e-111	Uncharacterized protein At4g15545 OS=Arabidopsis thaliana GN=At4g15545 PE=1 SV=1
CL10079.Contig1_All	2010	2761	76.5671	2539	72.7488	gi|224121826|ref|XP_002318682.1|	216.5	1e-54	predicted protein [Populus trichocarpa] >gi|222859355|gb|EEE96902.1| predicted protein [Populus trichocarpa]	gi|225456950|ref|XM_002281635.1|	1782	0	PREDICTED: Vitis vinifera cell division cycle protein 48 homolog-like (LOC100258668), mRNA	sp|Q9SCN8|CD48D_ARATH	1093	0	Cell division control protein 48 homolog D OS=Arabidopsis thaliana GN=CDC48D PE=1 SV=1
CL10079.Contig2_All	1107	1015	51.1081	868	45.1576	gi|224133614|ref|XP_002321618.1|	141	3e-32	predicted protein [Populus trichocarpa] >gi|222868614|gb|EEF05745.1| predicted protein [Populus trichocarpa]	gi|160953330|emb|CU229922.1|	894	0	Populus EST from mild drought-stressed leaves	sp|Q96372|CDC48_CAPAN	460	6e-130	Cell division cycle protein 48 homolog OS=Capsicum annuum GN=CAFP PE=2 SV=1
CL1008.Contig1_All	925	56	3.3746	51	3.1753	gi|224060552|ref|XP_002300234.1|	270	3e-71	stress enhanced protein 1 [Populus trichocarpa] >gi|222847492|gb|EEE85039.1| stress enhanced protein 1 [Populus trichocarpa]	gi|224060551|ref|XM_002300198.1|	1402	0	Populus trichocarpa stress enhanced protein 1 (Lil4_1), mRNA	--	--	--	--
CL1008.Contig2_All	746	160	11.9551	335	25.8622	gi|224105605|ref|XP_002313869.1|	263.1	3e-69	stress-enhanced protein 1 [Populus trichocarpa] >gi|222850277|gb|EEE87824.1| stress-enhanced protein 1 [Populus trichocarpa]	gi|224105604|ref|XM_002313833.1|	995	0	Populus trichocarpa stress-enhanced protein 1 (Lil4_2), mRNA	--	--	--	--
CL1008.Contig3_All	221	3	0.7567	9	2.3454	--	--	--	--	gi|224105604|ref|XM_002313833.1|	307	2e-81	Populus trichocarpa stress-enhanced protein 1 (Lil4_2), mRNA	--	--	--	--
CL10080.Contig1_All	1435	401	15.5763	373	14.9698	gi|224055015|ref|XP_002298402.1|	443.7	3e-123	predicted protein [Populus trichocarpa] >gi|222845660|gb|EEE83207.1| predicted protein [Populus trichocarpa]	gi|359478378|ref|XM_002285393.2|	256	6e-65	PREDICTED: Vitis vinifera uncharacterized LOC100246804 (LOC100246804), mRNA	--	--	--	--
CL10081.Contig1_All	611	24	2.1895	36	3.3933	gi|224099237|ref|XP_002311412.1|	230.7	1e-59	predicted protein [Populus trichocarpa] >gi|222851232|gb|EEE88779.1| predicted protein [Populus trichocarpa]	gi|359473635|ref|XM_002266853.2|	99.6	3e-18	PREDICTED: Vitis vinifera uncharacterized LOC100247891 (LOC100247891), mRNA	--	--	--	--
CL10081.Contig2_All	663	88	7.3984	52	4.517	gi|224099237|ref|XP_002311412.1|	248.8	5e-65	predicted protein [Populus trichocarpa] >gi|222851232|gb|EEE88779.1| predicted protein [Populus trichocarpa]	gi|359473635|ref|XM_002266853.2|	99.6	4e-18	PREDICTED: Vitis vinifera uncharacterized LOC100247891 (LOC100247891), mRNA	--	--	--	--
CL10082.Contig1_All	1000	104	5.797	70	4.0314	gi|224122486|ref|XP_002330493.1|	604.4	9e-172	predicted protein [Populus trichocarpa] >gi|222872427|gb|EEF09558.1| predicted protein [Populus trichocarpa]	gi|114158746|gb|AC187853.2|	131	2e-27	Populus trichocarpa clone Pop1-117C24, complete sequence	sp|Q9FPQ6|GP1_CHLRE	98.2	7e-21	Vegetative cell wall protein gp1 OS=Chlamydomonas reinhardtii GN=GP1 PE=2 SV=1
CL10082.Contig2_All	245	16	3.6402	3	0.7052	gi|224112140|ref|XP_002332827.1|	143.7	8e-34	predicted protein [Populus trichocarpa] >gi|222833258|gb|EEE71735.1| predicted protein [Populus trichocarpa]	gi|114158746|gb|AC187853.2|	297	3e-78	Populus trichocarpa clone Pop1-117C24, complete sequence	--	--	--	--
CL10083.Contig1_All	373	33	4.9315	39	6.0216	gi|224107933|ref|XP_002314659.1|	148.7	2e-35	predicted protein [Populus trichocarpa] >gi|222863699|gb|EEF00830.1| predicted protein [Populus trichocarpa]	gi|356535340|ref|XM_003536157.1|	83.8	1e-13	PREDICTED: Glycine max U-box domain-containing protein 44-like (LOC100783638), mRNA	--	--	--	--
CL10083.Contig2_All	290	22	4.2286	5	0.993	gi|224107933|ref|XP_002314659.1|	148.7	2e-35	predicted protein [Populus trichocarpa] >gi|222863699|gb|EEF00830.1| predicted protein [Populus trichocarpa]	gi|356535340|ref|XM_003536157.1|	83.8	9e-14	PREDICTED: Glycine max U-box domain-containing protein 44-like (LOC100783638), mRNA	--	--	--	--
CL10084.Contig1_All	1089	283	14.4854	327	17.2933	gi|118485411|gb|ABK94562.1|	562	6e-159	unknown [Populus trichocarpa]	gi|168176841|gb|AC217585.1|	176	3e-41	Populus trichocarpa clone POP021-H02, complete sequence	--	--	--	--
CL10084.Contig2_All	580	41	3.9403	47	4.6669	gi|224144834|ref|XP_002325431.1|	383.6	1e-105	predicted protein [Populus trichocarpa] >gi|222862306|gb|EEE99812.1| predicted protein [Populus trichocarpa]	gi|168176841|gb|AC217585.1|	345	3e-92	Populus trichocarpa clone POP021-H02, complete sequence	--	--	--	--
CL10085.Contig1_All	232	8	1.9221	3	0.7447	gi|224104191|ref|XP_002313352.1|	141.4	4e-33	predicted protein [Populus trichocarpa] >gi|222849760|gb|EEE87307.1| predicted protein [Populus trichocarpa]	gi|359479369|ref|XM_002274451.2|	145	2e-32	PREDICTED: Vitis vinifera zinc finger CCCH domain-containing protein 53-like (LOC100260228), mRNA	sp|Q9SV09|C3H46_ARATH	108	7e-25	Zinc finger CCCH domain-containing protein 46 OS=Arabidopsis thaliana GN=At3g51950 PE=1 SV=1
CL10085.Contig2_All	625	76	6.7781	36	3.3173	gi|224104191|ref|XP_002313352.1|	421.4	5e-117	predicted protein [Populus trichocarpa] >gi|222849760|gb|EEE87307.1| predicted protein [Populus trichocarpa]	gi|359479369|ref|XM_002274451.2|	159	4e-36	PREDICTED: Vitis vinifera zinc finger CCCH domain-containing protein 53-like (LOC100260228), mRNA	sp|Q0D3J9|C3H53_ORYSJ	201	2e-52	Zinc finger CCCH domain-containing protein 53 OS=Oryza sativa subsp. japonica GN=Os07g0682400 PE=2 SV=1
CL10086.Contig1_All	279	17	3.3964	17	3.5092	--	--	--	--	--	--	--	--	--	--	--	--
CL10087.Contig1_All	912	70	4.2783	37	2.3365	gi|224085980|ref|XP_002307763.1|	567	1e-160	predicted protein [Populus trichocarpa] >gi|222857212|gb|EEE94759.1| predicted protein [Populus trichocarpa]	gi|292782843|dbj|AK338209.1|	198	7e-48	Lotus japonicus cDNA, clone: LjFL2-014-CB06, HTC	--	--	--	--
CL10087.Contig2_All	861	75	4.8555	68	4.5485	gi|224085980|ref|XP_002307763.1|	478	8e-134	predicted protein [Populus trichocarpa] >gi|222857212|gb|EEE94759.1| predicted protein [Populus trichocarpa]	gi|292782843|dbj|AK338209.1|	228	8e-57	Lotus japonicus cDNA, clone: LjFL2-014-CB06, HTC	--	--	--	--
CL10088.Contig1_All	236	25	5.9047	27	6.5889	gi|224121542|ref|XP_002330726.1|	116.7	1e-25	predicted protein [Populus trichocarpa] >gi|222872502|gb|EEF09633.1| predicted protein [Populus trichocarpa]	gi|470115889|ref|XM_004294076.1|	60	1e-06	PREDICTED: Fragaria vesca subsp. vesca probable LRR receptor-like serine/threonine-protein kinase At1g56140-like, transcript variant 2 (LOC101300987), mRNA	--	--	--	--
CL10088.Contig2_All	348	78	12.4936	46	7.6127	gi|224114834|ref|XP_002316869.1|	127.9	4e-29	predicted protein [Populus trichocarpa] >gi|222859934|gb|EEE97481.1| predicted protein [Populus trichocarpa]	gi|224114833|ref|XM_002316833.1|	525	1e-147	Populus trichocarpa predicted protein, mRNA	--	--	--	--
CL10089.Contig1_All	439	24	3.0473	16	2.099	gi|224116712|ref|XP_002331859.1|	216.9	7e-56	predicted protein [Populus trichocarpa] >gi|222875377|gb|EEF12508.1| predicted protein [Populus trichocarpa]	gi|351726811|ref|NM_001250722.1|	163	2e-37	Glycine max uncharacterized LOC100527291 (LOC100527291), mRNA	--	--	--	--
CL10089.Contig2_All	587	48	4.558	37	3.6301	gi|224114383|ref|XP_002316743.1|	305.8	2e-82	predicted protein [Populus trichocarpa] >gi|222859808|gb|EEE97355.1| predicted protein [Populus trichocarpa]	gi|351726811|ref|NM_001250722.1|	131	9e-28	Glycine max uncharacterized LOC100527291 (LOC100527291), mRNA	--	--	--	--
CL1009.Contig1_All	1279	890	38.7874	731	32.9159	gi|359500476|gb|AEV53413.1|	94	6e-18	SANT DNA-binding domain-containing protein [Populus tomentosa]	gi|359500475|gb|JN315782.1|	698	0	Populus tomentosa SANT DNA-binding domain-containing protein (GT2) gene, complete cds	sp|Q39117|TGT2_ARATH	180	2e-45	Trihelix transcription factor GT-2 OS=Arabidopsis thaliana GN=GT-2 PE=2 SV=1
CL1009.Contig2_All	2385	381	8.9045	361	8.7172	gi|224085115|ref|XP_002307497.1|	933.7	0	predicted protein [Populus trichocarpa] >gi|222856946|gb|EEE94493.1| predicted protein [Populus trichocarpa]	gi|359500475|gb|JN315782.1|	1592	0	Populus tomentosa SANT DNA-binding domain-containing protein (GT2) gene, complete cds	sp|Q39117|TGT2_ARATH	483	2e-136	Trihelix transcription factor GT-2 OS=Arabidopsis thaliana GN=GT-2 PE=2 SV=1
CL1009.Contig3_All	2421	1818	41.8572	1835	43.6516	gi|224085115|ref|XP_002307497.1|	1081.6	0	predicted protein [Populus trichocarpa] >gi|222856946|gb|EEE94493.1| predicted protein [Populus trichocarpa]	gi|359500475|gb|JN315782.1|	1933	0	Populus tomentosa SANT DNA-binding domain-containing protein (GT2) gene, complete cds	sp|Q39117|TGT2_ARATH	499	2e-141	Trihelix transcription factor GT-2 OS=Arabidopsis thaliana GN=GT-2 PE=2 SV=1
CL1009.Contig4_All	2629	2326	49.3163	2303	50.4502	gi|359500476|gb|AEV53413.1|	1053.5	0	SANT DNA-binding domain-containing protein [Populus tomentosa]	gi|359500475|gb|JN315782.1|	3237	0	Populus tomentosa SANT DNA-binding domain-containing protein (GT2) gene, complete cds	sp|Q39117|TGT2_ARATH	493	3e-139	Trihelix transcription factor GT-2 OS=Arabidopsis thaliana GN=GT-2 PE=2 SV=1
CL1009.Contig5_All	274	71	14.4437	67	14.0826	gi|224116608|ref|XP_002331882.1|	92	3e-18	predicted protein [Populus trichocarpa] >gi|222874631|gb|EEF11762.1| predicted protein [Populus trichocarpa]	gi|157743422|gb|AC211306.1|	527	1e-147	Populus trichocarpa clone POP004-K18, complete sequence	sp|Q39117|TGT2_ARATH	154	9e-39	Trihelix transcription factor GT-2 OS=Arabidopsis thaliana GN=GT-2 PE=2 SV=1
CL10090.Contig1_All	238	8908	2086.29	8885	2150.01	gi|356551334|ref|XP_003544031.1|	37	1e-15	PREDICTED: uncharacterized protein LOC100803684 [Glycine max]	gi|312270208|gb|HQ404882.1|	377	1e-102	Chlorococcum tatrense culture-collection CCCryo<DEU>:205-05 18S ribosomal RNA gene, partial sequence; internal transcribed spacer 1, 5.8S ribosomal RNA gene, and internal transcribed spacer 2, complete sequence; and 26S ribosomal RNA gene, partial sequence	--	--	--	--
CL10091.Contig1_All	622	151	13.5319	154	14.259	gi|224107453|ref|XP_002314485.1|	285.4	4e-76	predicted protein [Populus trichocarpa] >gi|222863525|gb|EEF00656.1| predicted protein [Populus trichocarpa]	gi|359477670|ref|XM_002285285.2|	168	4e-39	PREDICTED: Vitis vinifera pleckstrin homology domain-containing family A member 8-like (LOC100259735), mRNA	--	--	--	--
CL10091.Contig2_All	589	28	2.6498	54	5.28	gi|224107453|ref|XP_002314485.1|	177.2	1e-43	predicted protein [Populus trichocarpa] >gi|222863525|gb|EEF00656.1| predicted protein [Populus trichocarpa]	gi|470120589|ref|XM_004296334.1|	117	1e-23	PREDICTED: Fragaria vesca subsp. vesca pleckstrin homology domain-containing family A member 8-like (LOC101305159), mRNA	--	--	--	--
CL10092.Contig1_All	1290	1494	64.5554	1178	52.5914	gi|224105935|ref|XP_002313984.1|	429.5	6e-119	predicted protein [Populus trichocarpa] >gi|222850392|gb|EEE87939.1| predicted protein [Populus trichocarpa]	gi|160953211|emb|CU229803.1|	1070	0	Populus EST from mild drought-stressed leaves	sp|Q9LMK7|RBP1A_ARATH	318	6e-87	Ran-binding protein 1 homolog a OS=Arabidopsis thaliana GN=RANBP1A PE=1 SV=1
CL10092.Contig2_All	1198	1074	49.9711	939	45.1407	gi|224055337|ref|XP_002298487.1|	416.8	3e-115	predicted protein [Populus trichocarpa] >gi|118481604|gb|ABK92744.1| unknown [Populus trichocarpa] >gi|222845745|gb|EEE83292.1| predicted protein [Populus trichocarpa]	gi|160953211|emb|CU229803.1|	989	0	Populus EST from mild drought-stressed leaves	sp|Q9LMK7|RBP1A_ARATH	323	2e-88	Ran-binding protein 1 homolog a OS=Arabidopsis thaliana GN=RANBP1A PE=1 SV=1
CL10093.Contig1_All	379	43	6.3241	44	6.6861	gi|224112529|ref|XP_002316221.1|	71.6	4e-12	predicted protein [Populus trichocarpa] >gi|222865261|gb|EEF02392.1| predicted protein [Populus trichocarpa]	gi|105576878|gb|AC184089.2|	410	1e-112	Populus trichocarpa clone Pop1-58K16, complete sequence	sp|Q9ZT48|ATE1_ARATH	50.4	3e-07	Arginyl-tRNA--protein transferase 1 OS=Arabidopsis thaliana GN=ATE1 PE=2 SV=2
CL10093.Contig2_All	364	90	13.782	88	13.9232	gi|255571911|ref|XP_002526898.1|	73.9	8e-13	Arginyl-tRNA--protein transferase, putative [Ricinus communis] >gi|223533797|gb|EEF35529.1| Arginyl-tRNA--protein transferase, putative [Ricinus communis]	gi|105576878|gb|AC184089.2|	410	1e-112	Populus trichocarpa clone Pop1-58K16, complete sequence	sp|Q9ZT48|ATE1_ARATH	52.4	7e-08	Arginyl-tRNA--protein transferase 1 OS=Arabidopsis thaliana GN=ATE1 PE=2 SV=2
CL10094.Contig1_All	418	88	11.7349	62	8.5423	--	--	--	--	gi|156616413|gb|AC209188.1|	799	0	Populus trichocarpa clone POP073-O22, complete sequence	--	--	--	--
CL10095.Contig1_All	267	47	9.812	41	8.8437	gi|224114233|ref|XP_002332407.1|	109.8	1e-23	predicted protein [Populus trichocarpa] >gi|222832340|gb|EEE70817.1| predicted protein [Populus trichocarpa]	gi|160949575|emb|CU228741.1|	141	4e-31	Populus EST from severe drought-stressed leaves	--	--	--	--
CL10095.Contig2_All	418	55	7.3343	65	8.9556	gi|224114233|ref|XP_002332407.1|	128.6	2e-29	predicted protein [Populus trichocarpa] >gi|222832340|gb|EEE70817.1| predicted protein [Populus trichocarpa]	gi|160949575|emb|CU228741.1|	141	7e-31	Populus EST from severe drought-stressed leaves	--	--	--	--
CL10096.Contig1_All	729	52	3.976	43	3.397	gi|224055523|ref|XP_002298521.1|	247.7	1e-64	predicted protein [Populus trichocarpa] >gi|222845779|gb|EEE83326.1| predicted protein [Populus trichocarpa]	gi|225452439|ref|XM_002277488.1|	125	7e-26	PREDICTED: Vitis vinifera proteasome assembly chaperone 3-like (LOC100242250), mRNA	--	--	--	--
CL10096.Contig2_All	525	14	1.4864	7	0.7679	gi|224055523|ref|XP_002298521.1|	247.7	6e-65	predicted protein [Populus trichocarpa] >gi|222845779|gb|EEE83326.1| predicted protein [Populus trichocarpa]	gi|225452439|ref|XM_002277488.1|	125	5e-26	PREDICTED: Vitis vinifera proteasome assembly chaperone 3-like (LOC100242250), mRNA	--	--	--	--
CL10097.Contig1_All	292	20	3.8178	29	5.7197	--	--	--	--	--	--	--	--	--	--	--	--
CL10097.Contig2_All	592	95	8.9449	102	9.9229	gi|224069020|ref|XP_002326255.1|	109.8	2e-23	glycosyltransferase [Populus trichocarpa] >gi|222833448|gb|EEE71925.1| glycosyltransferase [Populus trichocarpa]	gi|224069019|ref|XM_002326219.1|	281	4e-73	Populus trichocarpa glycosyltransferase, mRNA	sp|Q9ZVI7|GAUT7_ARATH	67	7e-12	Probable galacturonosyltransferase 7 OS=Arabidopsis thaliana GN=GAUT7 PE=1 SV=2
CL10098.Contig1_All	501	224	24.9219	172	19.772	gi|224115644|ref|XP_002332107.1|	229.2	2e-59	predicted protein [Populus trichocarpa] >gi|222874927|gb|EEF12058.1| predicted protein [Populus trichocarpa]	gi|158303380|gb|AC212797.1|	924	0	Populus trichocarpa clone POP002-A07, complete sequence	sp|Q2MHE4|HT1_ARATH	118	2e-27	Serine/threonine-protein kinase HT1 OS=Arabidopsis thaliana GN=HT1 PE=1 SV=1
CL10098.Contig2_All	501	247	27.4809	198	22.7608	gi|224121256|ref|XP_002330782.1|	235	4e-61	predicted protein [Populus trichocarpa] >gi|222872584|gb|EEF09715.1| predicted protein [Populus trichocarpa]	gi|158303380|gb|AC212797.1|	694	0	Populus trichocarpa clone POP002-A07, complete sequence	sp|Q2MHE4|HT1_ARATH	117	4e-27	Serine/threonine-protein kinase HT1 OS=Arabidopsis thaliana GN=HT1 PE=1 SV=1
CL10098.Contig3_All	212	82	21.56	74	20.1027	gi|224115648|ref|XP_002332108.1|	108.2	4e-23	predicted protein [Populus trichocarpa] >gi|222874928|gb|EEF12059.1| predicted protein [Populus trichocarpa]	gi|158303380|gb|AC212797.1|	349	7e-94	Populus trichocarpa clone POP002-A07, complete sequence	--	--	--	--
CL10099.Contig1_All	1476	36	1.3595	21	0.8194	gi|224091595|ref|XP_002309294.1|	681	0	predicted protein [Populus trichocarpa] >gi|222855270|gb|EEE92817.1| predicted protein [Populus trichocarpa]	gi|470135046|ref|XM_004303294.1|	264	2e-67	PREDICTED: Fragaria vesca subsp. vesca activator of 90 kDa heat shock protein ATPase homolog 1-like (LOC101308889), mRNA	sp|P13983|EXTN_TOBAC	52.4	7e-07	Extensin OS=Nicotiana tabacum GN=HRGPNT3 PE=2 SV=1
CL10099.Contig2_All	1422	54	2.1167	33	1.3365	gi|224091595|ref|XP_002309294.1|	681	0	predicted protein [Populus trichocarpa] >gi|222855270|gb|EEE92817.1| predicted protein [Populus trichocarpa]	gi|470135046|ref|XM_004303294.1|	264	2e-67	PREDICTED: Fragaria vesca subsp. vesca activator of 90 kDa heat shock protein ATPase homolog 1-like (LOC101308889), mRNA	sp|P13983|EXTN_TOBAC	52.4	7e-07	Extensin OS=Nicotiana tabacum GN=HRGPNT3 PE=2 SV=1
CL10099.Contig3_All	787	286	20.2564	227	16.6116	gi|224138130|ref|XP_002322737.1|	381.7	7e-105	predicted protein [Populus trichocarpa] >gi|222867367|gb|EEF04498.1| predicted protein [Populus trichocarpa]	gi|225441488|ref|XM_002280118.1|	274	1e-70	PREDICTED: Vitis vinifera activator of 90 kDa heat shock protein ATPase homolog 1-like, transcript variant 1 (LOC100250457), mRNA	sp|O65375|LRX1_ARATH	62.4	3e-10	Leucine-rich repeat extensin-like protein 1 OS=Arabidopsis thaliana GN=LRX1 PE=1 SV=1
CL10099.Contig4_All	1418	66	2.5944	50	2.0307	gi|224091595|ref|XP_002309294.1|	687.6	0	predicted protein [Populus trichocarpa] >gi|222855270|gb|EEE92817.1| predicted protein [Populus trichocarpa]	gi|470135046|ref|XM_004303294.1|	264	2e-67	PREDICTED: Fragaria vesca subsp. vesca activator of 90 kDa heat shock protein ATPase homolog 1-like (LOC101308889), mRNA	sp|Q9S740|AGP19_ARATH	50.8	2e-06	Lysine-rich arabinogalactan protein 19 OS=Arabidopsis thaliana GN=AGP19 PE=2 SV=2
CL10099.Contig5_All	778	68	4.8719	51	3.7753	gi|224138130|ref|XP_002322737.1|	443	2e-123	predicted protein [Populus trichocarpa] >gi|222867367|gb|EEF04498.1| predicted protein [Populus trichocarpa]	gi|357509994|ref|XM_003625238.1|	281	5e-73	Medicago truncatula Activator of 90 kDa heat shock protein ATPase-like protein (MTR_7g093500) mRNA, complete cds	sp|O65375|LRX1_ARATH	63.2	2e-10	Leucine-rich repeat extensin-like protein 1 OS=Arabidopsis thaliana GN=LRX1 PE=1 SV=1
CL10099.Contig6_All	1371	81	3.2932	65	2.7305	gi|224091595|ref|XP_002309294.1|	687.6	0	predicted protein [Populus trichocarpa] >gi|222855270|gb|EEE92817.1| predicted protein [Populus trichocarpa]	gi|470135046|ref|XM_004303294.1|	264	2e-67	PREDICTED: Fragaria vesca subsp. vesca activator of 90 kDa heat shock protein ATPase homolog 1-like (LOC101308889), mRNA	sp|Q9S740|AGP19_ARATH	50.8	2e-06	Lysine-rich arabinogalactan protein 19 OS=Arabidopsis thaliana GN=AGP19 PE=2 SV=2
CL10099.Contig7_All	846	37	2.4378	32	2.1784	gi|224138130|ref|XP_002322737.1|	442.6	3e-123	predicted protein [Populus trichocarpa] >gi|222867367|gb|EEF04498.1| predicted protein [Populus trichocarpa]	gi|357509994|ref|XM_003625238.1|	281	6e-73	Medicago truncatula Activator of 90 kDa heat shock protein ATPase-like protein (MTR_7g093500) mRNA, complete cds	sp|O65375|LRX1_ARATH	63.2	2e-10	Leucine-rich repeat extensin-like protein 1 OS=Arabidopsis thaliana GN=LRX1 PE=1 SV=1
CL101.Contig1_All	729	85	6.4992	80	6.3201	gi|224068971|ref|XP_002302869.1|	434.5	8e-121	aquaporin, MIP family, SIP subfamily [Populus trichocarpa] >gi|222844595|gb|EEE82142.1| aquaporin, MIP family, SIP subfamily [Populus trichocarpa]	gi|224068970|ref|XM_002302833.1|	1213	0	Populus trichocarpa aquaporin, MIP family, SIP subfamily, mRNA	sp|Q5VR89|SIP11_ORYSJ	239	9e-64	Aquaporin SIP1-1 OS=Oryza sativa subsp. japonica GN=SIP1-1 PE=2 SV=2
CL101.Contig2_All	373	56	8.3686	56	8.6465	gi|224131598|ref|XP_002321130.1|	253.4	7e-67	aquaporin, MIP family, SIP subfamily [Populus trichocarpa] >gi|222861903|gb|EEE99445.1| aquaporin, MIP family, SIP subfamily [Populus trichocarpa]	gi|224131597|ref|XM_002321094.1|	684	0	Populus trichocarpa aquaporin, MIP family, SIP subfamily, mRNA	sp|Q5VR89|SIP11_ORYSJ	167	1e-42	Aquaporin SIP1-1 OS=Oryza sativa subsp. japonica GN=SIP1-1 PE=2 SV=2
CL101.Contig3_All	713	75	5.8633	80	6.4619	gi|224068971|ref|XP_002302869.1|	399.8	2e-110	aquaporin, MIP family, SIP subfamily [Populus trichocarpa] >gi|222844595|gb|EEE82142.1| aquaporin, MIP family, SIP subfamily [Populus trichocarpa]	gi|160949867|emb|CU222904.1|	1126	0	Populus EST from leave	sp|Q5VR89|SIP11_ORYSJ	209	1e-54	Aquaporin SIP1-1 OS=Oryza sativa subsp. japonica GN=SIP1-1 PE=2 SV=2
CL1010.Contig1_All	239	4	0.9329	0	0	gi|224076148|ref|XP_002304896.1|	82.8	1e-15	predicted protein [Populus trichocarpa] >gi|222847860|gb|EEE85407.1| predicted protein [Populus trichocarpa]	gi|118482901|gb|EF145180.1|	256	9e-66	Populus trichocarpa clone WS01121_G03 unknown mRNA	--	--	--	--
CL1010.Contig2_All	851	23	1.5065	18	1.2182	gi|118482902|gb|ABK93365.1|	347.8	1e-94	unknown [Populus trichocarpa]	gi|160958609|emb|CU232226.1|	396	1e-107	Populus EST from mild drought-stressed leaves	--	--	--	--
CL1010.Contig3_All	1425	148	5.7892	117	4.7286	gi|224115766|ref|XP_002317119.1|	434.9	1e-120	predicted protein [Populus trichocarpa] >gi|222860184|gb|EEE97731.1| predicted protein [Populus trichocarpa]	gi|160958609|emb|CU232226.1|	396	1e-107	Populus EST from mild drought-stressed leaves	--	--	--	--
CL1010.Contig4_All	1155	210	10.1347	199	9.9227	gi|224112767|ref|XP_002332709.1|	615.9	4e-175	predicted protein [Populus trichocarpa] >gi|222832980|gb|EEE71457.1| predicted protein [Populus trichocarpa]	gi|224112766|ref|XM_002332672.1|	1624	0	Populus trichocarpa predicted protein, mRNA	--	--	--	--
CL1010.Contig5_All	283	29	5.7119	36	7.3261	gi|224076148|ref|XP_002304896.1|	184.5	4e-46	predicted protein [Populus trichocarpa] >gi|222847860|gb|EEE85407.1| predicted protein [Populus trichocarpa]	gi|224076147|ref|XM_002304860.1|	521	1e-145	Populus trichocarpa predicted protein, mRNA	--	--	--	--
CL10100.Contig1_All	2610	1689	36.0712	1256	27.7146	gi|298103716|emb|CBM42559.1|	1291.2	0	putative B-type response regulator 13 [Populus x canadensis]	gi|224106961|ref|XM_002314289.1|	3265	0	Populus trichocarpa type-b response regulator, mRNA	sp|Q9ZWJ9|ARR2_ARATH	641	0	Two-component response regulator ARR2 OS=Arabidopsis thaliana GN=ARR2 PE=1 SV=1
CL10100.Contig2_All	2675	987	20.5667	833	17.9341	gi|298103714|emb|CBM42558.1|	1270.4	0	putative B-type response regulator 12 [Populus x canadensis]	gi|224130443|ref|XM_002328574.1|	2428	0	Populus trichocarpa type-b response regulator, mRNA	sp|Q9ZWJ9|ARR2_ARATH	634	0	Two-component response regulator ARR2 OS=Arabidopsis thaliana GN=ARR2 PE=1 SV=1
CL10101.Contig1_All	440	37	4.6873	34	4.4503	gi|224097548|ref|XP_002310982.1|	150.2	9e-36	predicted protein [Populus trichocarpa] >gi|222850802|gb|EEE88349.1| predicted protein [Populus trichocarpa]	gi|157265592|gb|AC210132.1|	105	4e-20	Populus trichocarpa clone POP011-D09, complete sequence	--	--	--	--
CL10101.Contig2_All	555	83	8.336	81	8.4053	gi|224110100|ref|XP_002315415.1|	151	1e-35	predicted protein [Populus trichocarpa] >gi|222864455|gb|EEF01586.1| predicted protein [Populus trichocarpa]	gi|157265592|gb|AC210132.1|	105	5e-20	Populus trichocarpa clone POP011-D09, complete sequence	--	--	--	--
CL10102.Contig1_All	1010	24	1.3245	19	1.0834	gi|224060757|ref|XP_002300264.1|	320.5	2e-86	predicted protein [Populus trichocarpa] >gi|222847522|gb|EEE85069.1| predicted protein [Populus trichocarpa]	gi|160958525|emb|CU227199.1|	416	1e-113	Populus EST from severe drought-stressed leaves	sp|Q9SQK3|EM506_ARATH	263	9e-71	Ankyrin repeat domain-containing protein EMB506, chloroplastic OS=Arabidopsis thaliana GN=EMB506 PE=1 SV=1
CL10102.Contig2_All	1388	388	15.5817	317	13.1531	gi|224060757|ref|XP_002300264.1|	502.3	8e-141	predicted protein [Populus trichocarpa] >gi|222847522|gb|EEE85069.1| predicted protein [Populus trichocarpa]	gi|160958525|emb|CU227199.1|	416	1e-113	Populus EST from severe drought-stressed leaves	sp|Q9SQK3|EM506_ARATH	352	4e-97	Ankyrin repeat domain-containing protein EMB506, chloroplastic OS=Arabidopsis thaliana GN=EMB506 PE=1 SV=1
CL10103.Contig1_All	323	105	18.12	127	22.6444	--	--	--	--	gi|224069307|ref|XM_002326290.1|	297	4e-78	Populus trichocarpa predicted protein, mRNA	--	--	--	--
CL10103.Contig2_All	471	164	19.4086	147	17.9744	--	--	--	--	gi|224069307|ref|XM_002326290.1|	716	0	Populus trichocarpa predicted protein, mRNA	--	--	--	--
CL10104.Contig1_All	1653	356	12.0046	307	10.6961	gi|224083793|ref|XP_002307125.1|	713.8	0	predicted protein [Populus trichocarpa] >gi|222856574|gb|EEE94121.1| predicted protein [Populus trichocarpa]	gi|470110075|ref|XM_004291265.1|	932	0	PREDICTED: Fragaria vesca subsp. vesca cytoplasmic tRNA 2-thiolation protein 1-like (LOC101292957), mRNA	sp|O64862|CTU1_ARATH	649	0	Cytoplasmic tRNA 2-thiolation protein 1 OS=Arabidopsis thaliana GN=NCS6 PE=2 SV=2
CL10105.Contig1_All	863	50	3.2295	41	2.7361	gi|224106287|ref|XP_002314113.1|	407.1	1e-112	predicted protein [Populus trichocarpa] >gi|222850521|gb|EEE88068.1| predicted protein [Populus trichocarpa]	gi|470116201|ref|XM_004294226.1|	325	4e-86	PREDICTED: Fragaria vesca subsp. vesca flavoprotein WrbA-like (LOC101299748), mRNA	--	--	--	--
CL10105.Contig2_All	1133	32	1.5743	34	1.7283	gi|224106287|ref|XP_002314113.1|	407.1	2e-112	predicted protein [Populus trichocarpa] >gi|222850521|gb|EEE88068.1| predicted protein [Populus trichocarpa]	gi|470116201|ref|XM_004294226.1|	325	6e-86	PREDICTED: Fragaria vesca subsp. vesca flavoprotein WrbA-like (LOC101299748), mRNA	--	--	--	--
CL10106.Contig1_All	232	105	25.2274	90	22.3416	--	--	--	--	--	--	--	--	--	--	--	--
CL10107.Contig1_All	303	49	9.0142	41	7.7929	gi|118489758|gb|ABK96679.1|	138.3	3e-32	unknown [Populus trichocarpa x Populus deltoides]	gi|155029568|gb|AC208050.1|	170	5e-40	Populus trichocarpa clone POP066-L08, complete sequence	sp|O81833|SD11_ARATH	80.5	2e-16	G-type lectin S-receptor-like serine/threonine-protein kinase SD1-1 OS=Arabidopsis thaliana GN=SD11 PE=1 SV=1
CL10107.Contig2_All	1231	342	15.486	288	13.4739	gi|118489758|gb|ABK96679.1|	718.8	0	unknown [Populus trichocarpa x Populus deltoides]	gi|155029568|gb|AC208050.1|	1566	0	Populus trichocarpa clone POP066-L08, complete sequence	sp|O81832|Y4729_ARATH	405	2e-113	G-type lectin S-receptor-like serine/threonine-protein kinase At4g27290 OS=Arabidopsis thaliana GN=At4g27290 PE=3 SV=4
CL10108.Contig1_All	880	99	6.2708	94	6.1518	gi|224099479|ref|XP_002311501.1|	258.5	1e-67	predicted protein [Populus trichocarpa] >gi|222851321|gb|EEE88868.1| predicted protein [Populus trichocarpa]	gi|225424223|ref|XM_002284313.1|	248	8e-63	PREDICTED: Vitis vinifera uncharacterized LOC100262974, transcript variant 1 (LOC100262974), mRNA	--	--	--	--
CL10108.Contig2_All	633	20	1.7612	40	3.6393	gi|224099479|ref|XP_002311501.1|	253.8	1e-66	predicted protein [Populus trichocarpa] >gi|222851321|gb|EEE88868.1| predicted protein [Populus trichocarpa]	gi|225424223|ref|XM_002284313.1|	218	5e-54	PREDICTED: Vitis vinifera uncharacterized LOC100262974, transcript variant 1 (LOC100262974), mRNA	--	--	--	--
CL10109.Contig1_All	1631	134	4.5795	83	2.9308	gi|462407496|gb|EMJ12830.1|	687.2	0	hypothetical protein PRUPE_ppa005803mg [Prunus persica]	gi|470115170|ref|XM_004293728.1|	240	4e-60	PREDICTED: Fragaria vesca subsp. vesca APO protein 1, chloroplastic-like (LOC101294539), mRNA	sp|Q9XIR4|APO1_ARATH	583	1e-166	APO protein 1, chloroplastic OS=Arabidopsis thaliana GN=APO1 PE=2 SV=1
CL10109.Contig2_All	1509	11	0.4063	9	0.3435	gi|462407496|gb|EMJ12830.1|	658.7	0	hypothetical protein PRUPE_ppa005803mg [Prunus persica]	gi|470115170|ref|XM_004293728.1|	248	1e-62	PREDICTED: Fragaria vesca subsp. vesca APO protein 1, chloroplastic-like (LOC101294539), mRNA	sp|Q9XIR4|APO1_ARATH	583	9e-167	APO protein 1, chloroplastic OS=Arabidopsis thaliana GN=APO1 PE=2 SV=1
CL10109.Contig3_All	1470	10	0.3792	13	0.5093	gi|462407496|gb|EMJ12830.1|	658.7	0	hypothetical protein PRUPE_ppa005803mg [Prunus persica]	gi|470115170|ref|XM_004293728.1|	248	1e-62	PREDICTED: Fragaria vesca subsp. vesca APO protein 1, chloroplastic-like (LOC101294539), mRNA	sp|Q9XIR4|APO1_ARATH	583	8e-167	APO protein 1, chloroplastic OS=Arabidopsis thaliana GN=APO1 PE=2 SV=1
CL1011.Contig1_All	332	16	2.6863	9	1.5612	gi|356573128|ref|XP_003554716.1|	89.7	1e-17	PREDICTED: uncharacterized protein LOC100810905 [Glycine max]	gi|356573127|ref|XM_003554668.1|	165	4e-38	PREDICTED: Glycine max uncharacterized protein LOC100810905 (LOC100810905), mRNA	sp|Q8GWB7|GUX6_ARATH	79	6e-16	Putative glucuronosyltransferase PGSIP6 OS=Arabidopsis thaliana GN=PGSIP6 PE=2 SV=1
CL1011.Contig2_All	592	3	0.2825	1	0.0973	gi|224123610|ref|XP_002319122.1|	94.4	1e-66	predicted protein [Populus trichocarpa] >gi|222857498|gb|EEE95045.1| predicted protein [Populus trichocarpa]	gi|356573127|ref|XM_003554668.1|	194	7e-47	PREDICTED: Glycine max uncharacterized protein LOC100810905 (LOC100810905), mRNA	sp|Q8GWB7|GUX6_ARATH	135	1e-38	Putative glucuronosyltransferase PGSIP6 OS=Arabidopsis thaliana GN=PGSIP6 PE=2 SV=1
CL1011.Contig3_All	513	1	0.1087	0	0	gi|224123610|ref|XP_002319122.1|	267.3	7e-71	predicted protein [Populus trichocarpa] >gi|222857498|gb|EEE95045.1| predicted protein [Populus trichocarpa]	gi|356573127|ref|XM_003554668.1|	194	6e-47	PREDICTED: Glycine max uncharacterized protein LOC100810905 (LOC100810905), mRNA	sp|Q8GWB7|GUX6_ARATH	166	5e-42	Putative glucuronosyltransferase PGSIP6 OS=Arabidopsis thaliana GN=PGSIP6 PE=2 SV=1
CL1011.Contig4_All	482	55	6.3604	26	3.1066	gi|224123610|ref|XP_002319122.1|	287	8e-77	predicted protein [Populus trichocarpa] >gi|222857498|gb|EEE95045.1| predicted protein [Populus trichocarpa]	gi|356573127|ref|XM_003554668.1|	194	6e-47	PREDICTED: Glycine max uncharacterized protein LOC100810905 (LOC100810905), mRNA	sp|Q8GWB7|GUX6_ARATH	174	3e-44	Putative glucuronosyltransferase PGSIP6 OS=Arabidopsis thaliana GN=PGSIP6 PE=2 SV=1
CL1011.Contig5_All	2008	7	0.1943	3	0.086	gi|224123610|ref|XP_002319122.1|	1089	0	predicted protein [Populus trichocarpa] >gi|222857498|gb|EEE95045.1| predicted protein [Populus trichocarpa]	gi|356533646|ref|XR_136860.1|	448	1e-122	PREDICTED: Glycine max uncharacterized LOC100793342 (LOC100793342), miscRNA	sp|Q9LSB1|GUX1_ARATH	119	5e-27	UDP-glucuronate:xylan alpha-glucuronosyltransferase 1 OS=Arabidopsis thaliana GN=GUX1 PE=2 SV=1
CL1011.Contig6_All	1323	19	0.8005	7	0.3047	gi|224123610|ref|XP_002319122.1|	114.4	0	predicted protein [Populus trichocarpa] >gi|222857498|gb|EEE95045.1| predicted protein [Populus trichocarpa]	gi|292682982|dbj|AK339534.1|	444	1e-121	Lotus japonicus cDNA, clone: LjFL3-021-AB05, HTC	sp|Q9LSB1|GUX1_ARATH	120	2e-27	UDP-glucuronate:xylan alpha-glucuronosyltransferase 1 OS=Arabidopsis thaliana GN=GUX1 PE=2 SV=1
CL1011.Contig7_All	1316	14	0.593	9	0.3939	gi|224123610|ref|XP_002319122.1|	620.5	1e-176	predicted protein [Populus trichocarpa] >gi|222857498|gb|EEE95045.1| predicted protein [Populus trichocarpa]	gi|356573127|ref|XM_003554668.1|	194	2e-46	PREDICTED: Glycine max uncharacterized protein LOC100810905 (LOC100810905), mRNA	sp|Q8GWB7|GUX6_ARATH	371	4e-103	Putative glucuronosyltransferase PGSIP6 OS=Arabidopsis thaliana GN=PGSIP6 PE=2 SV=1
CL1011.Contig8_All	1923	102	2.9566	103	3.0847	gi|224123610|ref|XP_002319122.1|	1089	0	predicted protein [Populus trichocarpa] >gi|222857498|gb|EEE95045.1| predicted protein [Populus trichocarpa]	gi|356533646|ref|XR_136860.1|	448	1e-122	PREDICTED: Glycine max uncharacterized LOC100793342 (LOC100793342), miscRNA	sp|Q9LSB1|GUX1_ARATH	119	5e-27	UDP-glucuronate:xylan alpha-glucuronosyltransferase 1 OS=Arabidopsis thaliana GN=GUX1 PE=2 SV=1
CL10110.Contig1_All	774	41	2.9527	30	2.2322	gi|224084382|ref|XP_002307279.1|	236.1	4e-61	predicted protein [Populus trichocarpa] >gi|20975734|emb|CAD29823.2| putative ubiquitin-conjugating enzyme [Populus x canadensis] >gi|118482783|gb|ABK93309.1| unknown [Populus trichocarpa] >gi|222856728|gb|EEE94275.1| predicted protein [Populus trichocarpa]	gi|160952022|emb|CU223871.1|	835	0	Populus EST from leave	sp|Q42551|SCE1_ARATH	213	8e-56	SUMO-conjugating enzyme SCE1 OS=Arabidopsis thaliana GN=SCE1 PE=1 SV=1
CL10110.Contig2_All	960	531	30.8315	614	36.8346	gi|224084382|ref|XP_002307279.1|	345.5	7e-94	predicted protein [Populus trichocarpa] >gi|20975734|emb|CAD29823.2| putative ubiquitin-conjugating enzyme [Populus x canadensis] >gi|118482783|gb|ABK93309.1| unknown [Populus trichocarpa] >gi|222856728|gb|EEE94275.1| predicted protein [Populus trichocarpa]	gi|160952022|emb|CU223871.1|	1265	0	Populus EST from leave	sp|Q42551|SCE1_ARATH	312	2e-85	SUMO-conjugating enzyme SCE1 OS=Arabidopsis thaliana GN=SCE1 PE=1 SV=1
CL10111.Contig1_All	478	40	4.6645	31	3.735	gi|224111576|ref|XP_002315906.1|	318.5	2e-86	predicted protein [Populus trichocarpa] >gi|222864946|gb|EEF02077.1| predicted protein [Populus trichocarpa]	gi|470130106|ref|XM_004300899.1|	321	4e-85	PREDICTED: Fragaria vesca subsp. vesca probable ATP-dependent RNA helicase DHX36-like (LOC101310031), mRNA	sp|Q38953|DHX8_ARATH	64.7	2e-11	Probable pre-mRNA-splicing factor ATP-dependent RNA helicase OS=Arabidopsis thaliana GN=At3g26560 PE=1 SV=2
CL10112.Contig1_All	646	109	9.4051	104	9.2717	gi|224103655|ref|XP_002313141.1|	325.9	3e-88	predicted protein [Populus trichocarpa] >gi|222849549|gb|EEE87096.1| predicted protein [Populus trichocarpa]	gi|460230056|gb|GABL01036926.1|	65.9	5e-08	TSA: Camelina sativa comp48344_c0_seq1 transcribed RNA sequence	sp|Q9SSL9|PEPR1_ARATH	91.7	3e-19	Leucine-rich repeat receptor-like protein kinase PEPR1 OS=Arabidopsis thaliana GN=PEPR1 PE=1 SV=1
CL10112.Contig2_All	415	54	7.253	55	7.6326	gi|224056184|ref|XP_002298744.1|	268.9	1e-71	predicted protein [Populus trichocarpa] >gi|222846002|gb|EEE83549.1| predicted protein [Populus trichocarpa]	gi|330250293|gb|CP002685.1|	65.9	3e-08	Arabidopsis thaliana chromosome 2, complete sequence	sp|Q9C9N5|Y1668_ARATH	80.9	2e-16	Probable inactive leucine-rich repeat receptor-like protein kinase At1g66830 OS=Arabidopsis thaliana GN=At1g66830 PE=1 SV=1
CL10113.Contig1_All	1959	261	7.4264	286	8.408	gi|255569821|ref|XP_002525874.1|	688	0	Nibrin, putative [Ricinus communis] >gi|223534788|gb|EEF36478.1| Nibrin, putative [Ricinus communis]	gi|359476462|ref|XM_003631796.1|	127	5e-26	PREDICTED: Vitis vinifera uncharacterized LOC100853048 (LOC100853048), mRNA	--	--	--	--
CL10113.Contig2_All	1025	12	0.6526	5	0.2809	gi|224137108|ref|XP_002322495.1|	288.1	1e-76	predicted protein [Populus trichocarpa] >gi|222869491|gb|EEF06622.1| predicted protein [Populus trichocarpa]	gi|359476462|ref|XM_003631796.1|	127	2e-26	PREDICTED: Vitis vinifera uncharacterized LOC100853048 (LOC100853048), mRNA	--	--	--	--
CL10114.Contig1_All	1882	631	18.6888	641	19.6154	gi|224136708|ref|XP_002326925.1|	774.2	0	predicted protein [Populus trichocarpa] >gi|222835240|gb|EEE73675.1| predicted protein [Populus trichocarpa]	gi|158508738|gb|AC213012.1|	1287	0	Populus trichocarpa clone POP011-N24, complete sequence	--	--	--	--
CL10114.Contig2_All	205	12	3.2629	10	2.8093	gi|224067276|ref|XP_002302443.1|	137.5	6e-32	predicted protein [Populus trichocarpa] >gi|222844169|gb|EEE81716.1| predicted protein [Populus trichocarpa]	gi|158508738|gb|AC213012.1|	147	5e-33	Populus trichocarpa clone POP011-N24, complete sequence	--	--	--	--
CL10114.Contig3_All	313	52	9.2604	49	9.0159	gi|224067276|ref|XP_002302443.1|	199.1	1e-50	predicted protein [Populus trichocarpa] >gi|222844169|gb|EEE81716.1| predicted protein [Populus trichocarpa]	gi|158508738|gb|AC213012.1|	383	1e-104	Populus trichocarpa clone POP011-N24, complete sequence	--	--	--	--
CL10115.Contig1_All	231	28	6.7564	19	4.737	gi|224115074|ref|XP_002316933.1|	151.4	4e-36	predicted protein [Populus trichocarpa] >gi|222859998|gb|EEE97545.1| predicted protein [Populus trichocarpa]	gi|359493697|ref|XM_002281712.2|	159	1e-36	PREDICTED: Vitis vinifera myosin-J heavy chain-like (LOC100241905), mRNA	--	--	--	--
CL10116.Contig1_All	343	23	3.7377	7	1.1753	gi|429326576|gb|AFZ78628.1|	235.7	1e-61	korrigan [Populus tomentosa]	gi|429326575|gb|JX986691.1|	672	0	Populus tomentosa clone 3 korrigan gene, complete cds	sp|Q7XUK4|GUN12_ORYSJ	150	2e-37	Endoglucanase 12 OS=Oryza sativa subsp. japonica GN=GLU3 PE=2 SV=2
CL10116.Contig2_All	528	67	7.0731	64	6.9808	gi|347466549|gb|AEO97187.1|	345.9	1e-94	endo-1,4-beta-glucanase [Populus trichocarpa] >gi|347466603|gb|AEO97214.1| endo-1,4-beta-glucanase [Populus trichocarpa]	gi|347466548|gb|HQ331252.1|	864	0	Populus trichocarpa endo-1,4-beta-glucanase (GH9A4) mRNA, complete cds	sp|Q7XUK4|GUN12_ORYSJ	253	4e-68	Endoglucanase 12 OS=Oryza sativa subsp. japonica GN=GLU3 PE=2 SV=2
CL10117.Contig1_All	692	74	5.9607	47	3.9116	gi|302841653|ref|XP_002952371.1|	68.2	1e-10	hypothetical protein VOLCADRAFT_93060 [Volvox carteri f. nagariensis] >gi|300262307|gb|EFJ46514.1| hypothetical protein VOLCADRAFT_93060 [Volvox carteri f. nagariensis]	--	--	--	--	sp|Q9FPQ6|GP1_CHLRE	63.2	1e-10	Vegetative cell wall protein gp1 OS=Chlamydomonas reinhardtii GN=GP1 PE=2 SV=1
CL10118.Contig1_All	237	7	1.6463	0	0	gi|302803765|ref|XP_002983635.1|	55.8	2e-07	hypothetical protein SELMODRAFT_234317 [Selaginella moellendorffii] >gi|300148472|gb|EFJ15131.1| hypothetical protein SELMODRAFT_234317 [Selaginella moellendorffii]	gi|294846000|gb|GU814015.1|	58	4e-06	Chlamydomonas reinhardtii strain CC-2290 NIC7m (NIC7m), SPS1m (SPS1m), SPP1Cm (SPP1Cm), EIF5Bbm (EIF5Bbm), PTC1m (PTC1m), 182394m (182394m), 97782m (97782m), RFC4m (RFC4m), 182392m (182392m), ALB3m (ALB3m), PSF2m (PSF2m), 182390m (182390m), 182389m (182389m), 294687m (294687m), HDH1m (HDH1m), TOC34m (TOC34m), 522875m (522875m), LPS1m (LPS1m), PDK1m (PDK1m), CGL70m (CGL70m), NMDA1m (NMDA1m), DRG1m…	--	--	--	--
CL10118.Contig2_All	273	1	0.2042	2	0.4219	gi|302803765|ref|XP_002983635.1|	52.8	2e-06	hypothetical protein SELMODRAFT_234317 [Selaginella moellendorffii] >gi|300148472|gb|EFJ15131.1| hypothetical protein SELMODRAFT_234317 [Selaginella moellendorffii]	gi|294846000|gb|GU814015.1|	58	5e-06	Chlamydomonas reinhardtii strain CC-2290 NIC7m (NIC7m), SPS1m (SPS1m), SPP1Cm (SPP1Cm), EIF5Bbm (EIF5Bbm), PTC1m (PTC1m), 182394m (182394m), 97782m (97782m), RFC4m (RFC4m), 182392m (182392m), ALB3m (ALB3m), PSF2m (PSF2m), 182390m (182390m), 182389m (182389m), 294687m (294687m), HDH1m (HDH1m), TOC34m (TOC34m), 522875m (522875m), LPS1m (LPS1m), PDK1m (PDK1m), CGL70m (CGL70m), NMDA1m (NMDA1m), DRG1m…	sp|Q84ZL0|FH5_ORYSJ	45.4	8e-06	Formin-like protein 5 OS=Oryza sativa subsp. japonica GN=FH5 PE=2 SV=2
CL10119.Contig1_All	271	52	10.6956	55	11.6883	gi|224123694|ref|XP_002330185.1|	144.8	3e-34	predicted protein [Populus trichocarpa] >gi|222871641|gb|EEF08772.1| predicted protein [Populus trichocarpa]	gi|224123693|ref|XM_002330149.1|	412	1e-113	Populus trichocarpa predicted protein, mRNA	--	--	--	--
CL10119.Contig2_All	217	1	0.2569	1	0.2654	gi|224123694|ref|XP_002330185.1|	92.4	2e-18	predicted protein [Populus trichocarpa] >gi|222871641|gb|EEF08772.1| predicted protein [Populus trichocarpa]	gi|224123693|ref|XM_002330149.1|	244	3e-62	Populus trichocarpa predicted protein, mRNA	--	--	--	--
CL1012.Contig1_All	805	2129	147.418	1629	116.543	gi|224156725|ref|XP_002337753.1|	258.5	9e-68	predicted protein [Populus trichocarpa] >gi|222869657|gb|EEF06788.1| predicted protein [Populus trichocarpa]	gi|160958355|emb|CU231987.1|	575	1e-161	Populus EST from mild drought-stressed leaves	--	--	--	--
CL1012.Contig2_All	766	209	15.2086	164	12.3303	gi|118489803|gb|ABK96701.1|	212.6	5e-54	unknown [Populus trichocarpa x Populus deltoides]	gi|160958355|emb|CU231987.1|	989	0	Populus EST from mild drought-stressed leaves	--	--	--	--
CL1012.Contig3_All	815	955	65.3157	953	67.3433	gi|118489803|gb|ABK96701.1|	213	4e-54	unknown [Populus trichocarpa x Populus deltoides]	gi|160958355|emb|CU231987.1|	1037	0	Populus EST from mild drought-stressed leaves	--	--	--	--
CL1012.Contig4_All	743	167	12.5285	194	15.0374	gi|118489803|gb|ABK96701.1|	223.8	2e-57	unknown [Populus trichocarpa x Populus deltoides]	gi|160958355|emb|CU231987.1|	977	0	Populus EST from mild drought-stressed leaves	--	--	--	--
CL10120.Contig1_All	211	29	7.661	22	6.0048	gi|224080782|ref|XP_002306228.1|	113.2	1e-24	predicted protein [Populus trichocarpa] >gi|222849192|gb|EEE86739.1| predicted protein [Populus trichocarpa]	gi|70663491|emb|AM048818.1|	60	9e-07	Gossypium raimondii mRNA for sialyltransferase-like protein (stv1 gene)	--	--	--	--
CL10120.Contig2_All	1287	539	23.3444	552	24.7013	gi|224080782|ref|XP_002306228.1|	798.5	0	predicted protein [Populus trichocarpa] >gi|222849192|gb|EEE86739.1| predicted protein [Populus trichocarpa]	gi|70663491|emb|AM048818.1|	295	6e-77	Gossypium raimondii mRNA for sialyltransferase-like protein (stv1 gene)	--	--	--	--
CL10121.Contig1_All	275	15	3.0404	36	7.5393	--	--	--	--	--	--	--	--	--	--	--	--
CL10122.Contig1_All	569	2	0.1959	9	0.9109	gi|224065441|ref|XP_002301819.1|	241.1	7e-63	predicted protein [Populus trichocarpa] >gi|222843545|gb|EEE81092.1| predicted protein [Populus trichocarpa]	gi|403043702|ref|NM_001251774.2|	230	1e-57	Glycine max uncharacterized LOC100306684 (LOC100306684), mRNA	--	--	--	--
CL10122.Contig2_All	723	62	4.78	68	5.4166	gi|224065441|ref|XP_002301819.1|	241.1	1e-62	predicted protein [Populus trichocarpa] >gi|222843545|gb|EEE81092.1| predicted protein [Populus trichocarpa]	gi|403043702|ref|NM_001251774.2|	230	2e-57	Glycine max uncharacterized LOC100306684 (LOC100306684), mRNA	--	--	--	--
CL10123.Contig1_All	914	416	25.3699	498	31.3792	gi|224120446|ref|XP_002331050.1|	564.7	7e-160	predicted protein [Populus trichocarpa] >gi|222872980|gb|EEF10111.1| predicted protein [Populus trichocarpa]	gi|94173589|gb|AC182722.2|	456	1e-125	Populus trichocarpa clone Pop1-92L17, complete sequence	sp|Q9LMA1|FMO1_ARATH	212	3e-55	Probable flavin-containing monooxygenase 1 OS=Arabidopsis thaliana GN=FMO1 PE=2 SV=1
CL10124.Contig1_All	366	62	9.4424	65	10.228	gi|400991|sp|Q02984.1|RL27_PYRST	168.7	2e-41	RecName: Full=60S ribosomal protein L27 >gi|18267|emb|CAA48289.1| ribosomal protein L27 [Pyrobotrys stellata]	gi|18266|emb|X68202.1|	165	4e-38	C.stellata mRNA for ribosomal protein L27	sp|Q02984|RL27_PYRST	168	6e-43	60S ribosomal protein L27 OS=Pyrobotrys stellata GN=RPL27 PE=2 SV=1
CL10124.Contig2_All	491	29	3.2922	20	2.3459	gi|400991|sp|Q02984.1|RL27_PYRST	221.5	4e-57	RecName: Full=60S ribosomal protein L27 >gi|18267|emb|CAA48289.1| ribosomal protein L27 [Pyrobotrys stellata]	gi|18266|emb|X68202.1|	266	2e-68	C.stellata mRNA for ribosomal protein L27	sp|Q02984|RL27_PYRST	221	2e-58	60S ribosomal protein L27 OS=Pyrobotrys stellata GN=RPL27 PE=2 SV=1
CL10124.Contig3_All	484	11	1.2668	16	1.9039	gi|400991|sp|Q02984.1|RL27_PYRST	221.1	5e-57	RecName: Full=60S ribosomal protein L27 >gi|18267|emb|CAA48289.1| ribosomal protein L27 [Pyrobotrys stellata]	gi|18266|emb|X68202.1|	258	5e-66	C.stellata mRNA for ribosomal protein L27	sp|Q02984|RL27_PYRST	221	2e-58	60S ribosomal protein L27 OS=Pyrobotrys stellata GN=RPL27 PE=2 SV=1
CL10125.Contig1_All	338	21	3.4632	11	1.8743	gi|224012335|ref|XP_002294820.1|	120.6	7e-27	ABC transporter [Thalassiosira pseudonana CCMP1335] >gi|220969259|gb|EED87600.1| ABC transporter [Thalassiosira pseudonana CCMP1335]	--	--	--	--	sp|Q7PC82|AB42G_ARATH	103	2e-23	ABC transporter G family member 42 OS=Arabidopsis thaliana GN=ABCG42 PE=2 SV=1
CL10126.Contig1_All	888	1330	83.4853	1293	83.858	gi|413948023|gb|AFW80672.1|	66.2	8e-10	hypothetical protein ZEAMMB73_326479 [Zea mays]	gi|116734897|gb|AC185357.2|	77.8	2e-11	Populus trichocarpa clone Pop1-29F24, complete sequence	sp|Q2QYF3|SCR2_ORYSJ	58.5	5e-09	Protein SCARECROW 2 OS=Oryza sativa subsp. japonica GN=SCR2 PE=2 SV=1
CL10127.Contig1_All	477	37	4.3237	21	2.5355	gi|224094799|ref|XP_002310240.1|	140.2	1e-32	predicted protein [Populus trichocarpa] >gi|222853143|gb|EEE90690.1| predicted protein [Populus trichocarpa]	gi|224094798|ref|XM_002310204.1|	420	1e-115	Populus trichocarpa predicted protein, mRNA	--	--	--	--
CL10127.Contig2_All	987	203	11.4644	158	9.2193	gi|224134272|ref|XP_002327798.1|	476.9	2e-133	predicted protein [Populus trichocarpa] >gi|222836883|gb|EEE75276.1| predicted protein [Populus trichocarpa]	gi|359476691|ref|XM_002266541.2|	87.7	2e-14	PREDICTED: Vitis vinifera ZF-HD homeobox protein At4g24660-like (LOC100258112), mRNA	sp|Q9SB61|Y4466_ARATH	90.9	1e-18	ZF-HD homeobox protein At4g24660 OS=Arabidopsis thaliana GN=At4g24660 PE=1 SV=1
CL10128.Contig1_All	1649	3196	108.033	2795	97.6158	gi|224095228|ref|XP_002310363.1|	877.1	0	predicted protein [Populus trichocarpa] >gi|222853266|gb|EEE90813.1| predicted protein [Populus trichocarpa]	gi|160955394|emb|CU230808.1|	914	0	Populus EST from mild drought-stressed leaves	sp|O49543|NFS1_ARATH	704	0	Cysteine desulfurase 1, mitochondrial OS=Arabidopsis thaliana GN=NIFS PE=1 SV=1
CL10129.Contig1_All	642	138	11.9816	117	10.4957	gi|224135555|ref|XP_002327247.1|	320.9	1e-86	predicted protein [Populus trichocarpa] >gi|222835617|gb|EEE74052.1| predicted protein [Populus trichocarpa]	gi|224135554|ref|XM_002327211.1|	1106	0	Populus trichocarpa predicted protein, mRNA	sp|Q8LGG8|USPAL_ARATH	57.8	5e-09	Universal stress protein A-like protein OS=Arabidopsis thaliana GN=At3g01520 PE=1 SV=2
CL10129.Contig2_All	207	13	3.5006	11	3.0604	gi|224108458|ref|XP_002314855.1|	140.2	9e-33	predicted protein [Populus trichocarpa] >gi|222863895|gb|EEF01026.1| predicted protein [Populus trichocarpa]	gi|224108457|ref|XM_002314819.1|	363	4e-98	Populus trichocarpa predicted protein, mRNA	--	--	--	--
CL1013.Contig1_All	1361	50	2.0478	24	1.0156	gi|224118722|ref|XP_002317890.1|	72.8	1e-11	predicted protein [Populus trichocarpa] >gi|222858563|gb|EEE96110.1| predicted protein [Populus trichocarpa]	gi|162952071|gb|AC215940.1|	595	1e-167	Populus trichocarpa clone POP034-C23, complete sequence	sp|P29620|CDKD1_ORYSJ	364	7e-101	Cyclin-dependent kinase D-1 OS=Oryza sativa subsp. japonica GN=CDKD-1 PE=1 SV=1
CL1013.Contig2_All	1236	26	1.1725	18	0.8387	gi|224118722|ref|XP_002317890.1|	72.8	1e-11	predicted protein [Populus trichocarpa] >gi|222858563|gb|EEE96110.1| predicted protein [Populus trichocarpa]	gi|162952071|gb|AC215940.1|	595	1e-167	Populus trichocarpa clone POP034-C23, complete sequence	sp|P29620|CDKD1_ORYSJ	364	6e-101	Cyclin-dependent kinase D-1 OS=Oryza sativa subsp. japonica GN=CDKD-1 PE=1 SV=1
CL1013.Contig3_All	1658	269	9.0436	247	8.5797	gi|224118722|ref|XP_002317890.1|	849.7	0	predicted protein [Populus trichocarpa] >gi|222858563|gb|EEE96110.1| predicted protein [Populus trichocarpa]	gi|162952071|gb|AC215940.1|	595	1e-167	Populus trichocarpa clone POP034-C23, complete sequence	sp|P29620|CDKD1_ORYSJ	581	4e-166	Cyclin-dependent kinase D-1 OS=Oryza sativa subsp. japonica GN=CDKD-1 PE=1 SV=1
CL1013.Contig4_All	284	23	4.5142	34	6.8948	gi|224118722|ref|XP_002317890.1|	159.5	1e-38	predicted protein [Populus trichocarpa] >gi|222858563|gb|EEE96110.1| predicted protein [Populus trichocarpa]	gi|162952071|gb|AC215940.1|	262	2e-67	Populus trichocarpa clone POP034-C23, complete sequence	sp|P29620|CDKD1_ORYSJ	60.1	3e-10	Cyclin-dependent kinase D-1 OS=Oryza sativa subsp. japonica GN=CDKD-1 PE=1 SV=1
CL10130.Contig1_All	776	22	1.5803	68	5.0467	gi|224111490|ref|XP_002315876.1|	314.7	1e-84	predicted protein [Populus trichocarpa] >gi|222864916|gb|EEF02047.1| predicted protein [Populus trichocarpa]	gi|224111489|ref|XM_002315840.1|	1066	0	Populus trichocarpa predicted protein, mRNA	sp|Q9SSK9|MLP28_ARATH	177	6e-45	MLP-like protein 28 OS=Arabidopsis thaliana GN=MLP28 PE=1 SV=1
CL10130.Contig2_All	757	208	15.3158	248	18.8675	gi|224111490|ref|XP_002315876.1|	325.1	7e-88	predicted protein [Populus trichocarpa] >gi|222864916|gb|EEF02047.1| predicted protein [Populus trichocarpa]	gi|224111489|ref|XM_002315840.1|	942	0	Populus trichocarpa predicted protein, mRNA	sp|Q9SSK9|MLP28_ARATH	185	3e-47	MLP-like protein 28 OS=Arabidopsis thaliana GN=MLP28 PE=1 SV=1
CL10131.Contig1_All	1067	112	5.8509	82	4.426	gi|224138108|ref|XP_002326520.1|	570.5	1e-161	predicted protein [Populus trichocarpa] >gi|222833842|gb|EEE72319.1| predicted protein [Populus trichocarpa]	gi|357476664|ref|XM_003608570.1|	115	1e-22	Medicago truncatula AT-hook DNA-binding protein (MTR_4g098450) mRNA, complete cds	sp|Q9S7C9|ESCA_ARATH	243	1e-64	Putative DNA-binding protein ESCAROLA OS=Arabidopsis thaliana GN=ESC PE=2 SV=1
CL10131.Contig2_All	351	18	2.8585	22	3.6097	gi|224126485|ref|XP_002329566.1|	147.1	7e-35	predicted protein [Populus trichocarpa] >gi|222870275|gb|EEF07406.1| predicted protein [Populus trichocarpa]	gi|123706860|emb|AM484087.1|	71.9	4e-10	Vitis vinifera contig VV78X134110.5, whole genome shotgun sequence	--	--	--	--
CL10132.Contig1_All	2036	408	11.17	337	9.5326	gi|224105623|ref|XP_002313877.1|	793.5	0	predicted protein [Populus trichocarpa] >gi|222850285|gb|EEE87832.1| predicted protein [Populus trichocarpa]	gi|470136556|ref|XM_004304005.1|	297	2e-77	PREDICTED: Fragaria vesca subsp. vesca triacylglycerol lipase 1-like, transcript variant 2 (LOC101290786), mRNA	sp|Q71DJ5|LIP1_ARATH	548	6e-156	Triacylglycerol lipase 1 OS=Arabidopsis thaliana GN=LIP1 PE=1 SV=1
CL10132.Contig2_All	1179	92	4.3496	65	3.1751	gi|224105623|ref|XP_002313877.1|	282.3	1e-74	predicted protein [Populus trichocarpa] >gi|222850285|gb|EEE87832.1| predicted protein [Populus trichocarpa]	gi|470136556|ref|XM_004304005.1|	111	2e-21	PREDICTED: Fragaria vesca subsp. vesca triacylglycerol lipase 1-like, transcript variant 2 (LOC101290786), mRNA	sp|Q71DJ5|LIP1_ARATH	199	3e-51	Triacylglycerol lipase 1 OS=Arabidopsis thaliana GN=LIP1 PE=1 SV=1
CL10133.Contig1_All	4050	174	2.3948	119	1.6922	gi|224101667|ref|XP_002312375.1|	1843.5	0	predicted protein [Populus trichocarpa] >gi|222852195|gb|EEE89742.1| predicted protein [Populus trichocarpa]	gi|48331263|gb|AC149541.1|	3223	0	Populus trichocarpa clone Pop1-12C14, complete sequence	sp|F4JJP1|Y4759_ARATH	113	1e-24	WEB family protein At4g27595, chloroplastic OS=Arabidopsis thaliana GN=At4g27595 PE=2 SV=1
CL10133.Contig2_All	4122	314	4.2461	244	3.4091	gi|224101667|ref|XP_002312375.1|	1875.1	0	predicted protein [Populus trichocarpa] >gi|222852195|gb|EEE89742.1| predicted protein [Populus trichocarpa]	gi|48331263|gb|AC149541.1|	4024	0	Populus trichocarpa clone Pop1-12C14, complete sequence	sp|F4JJP1|Y4759_ARATH	113	1e-24	WEB family protein At4g27595, chloroplastic OS=Arabidopsis thaliana GN=At4g27595 PE=2 SV=1
CL10134.Contig1_All	243	49	11.2399	22	5.2141	gi|224061919|ref|XP_002300664.1|	76.3	1e-13	predicted protein [Populus trichocarpa] >gi|222842390|gb|EEE79937.1| predicted protein [Populus trichocarpa]	gi|224061918|ref|XM_002300628.1|	198	2e-48	Populus trichocarpa predicted protein, mRNA	--	--	--	--
CL10134.Contig2_All	318	97	17.0026	61	11.0474	gi|224061919|ref|XP_002300664.1|	217.6	4e-56	predicted protein [Populus trichocarpa] >gi|222842390|gb|EEE79937.1| predicted protein [Populus trichocarpa]	gi|224061918|ref|XM_002300628.1|	575	1e-161	Populus trichocarpa predicted protein, mRNA	sp|Q8VXV7|LDL1_ARATH	75.5	7e-15	Lysine-specific histone demethylase 1 homolog 1 OS=Arabidopsis thaliana GN=LDL1 PE=1 SV=1
CL10135.Contig1_All	328	28	4.7583	33	5.7943	gi|224073762|ref|XP_002304160.1|	228.8	2e-59	predicted protein [Populus trichocarpa] >gi|222841592|gb|EEE79139.1| predicted protein [Populus trichocarpa]	gi|335323726|gb|GU283637.1|	347	4e-93	Populus balsamifera isolate WHR03 haplotype B transducin family protein / WD40 repeat family protein gene, partial sequence	--	--	--	--
CL10135.Contig2_All	783	98	6.9765	78	5.7371	gi|224058701|ref|XP_002299610.1|	540.4	1e-152	predicted protein [Populus trichocarpa] >gi|222846868|gb|EEE84415.1| predicted protein [Populus trichocarpa]	gi|317106748|dbj|AP011975.1|	391	1e-106	Jatropha curcas DNA, clone: JHL25H03, complete sequence	sp|Q8H0T9|KTNB1_ARATH	63.5	1e-10	Katanin p80 WD40 repeat-containing subunit B1 homolog OS=Arabidopsis thaliana GN=At5g23430 PE=2 SV=3
CL10136.Contig1_All	316	15	2.6459	8	1.458	--	--	--	--	gi|224089347|ref|XM_002308663.1|	71.9	4e-10	Populus trichocarpa predicted protein, mRNA	--	--	--	--
CL10136.Contig2_All	219	3	0.7636	4	1.0519	--	--	--	--	gi|224089347|ref|XM_002308663.1|	77.8	4e-12	Populus trichocarpa predicted protein, mRNA	--	--	--	--
CL10137.Contig1_All	341	20	3.2692	21	3.5467	gi|242059145|ref|XP_002458718.1|	38.1	5e-13	hypothetical protein SORBIDRAFT_03g038910 [Sorghum bicolor] >gi|241930693|gb|EES03838.1| hypothetical protein SORBIDRAFT_03g038910 [Sorghum bicolor]	gi|160955941|emb|CU230950.1|	119	2e-24	Populus EST from mild drought-stressed leaves	--	--	--	--
CL10137.Contig2_All	550	69	6.9929	68	7.1204	gi|224091008|ref|XP_002309143.1|	369.8	1e-101	predicted protein [Populus trichocarpa] >gi|222855119|gb|EEE92666.1| predicted protein [Populus trichocarpa]	gi|160955941|emb|CU230950.1|	307	6e-81	Populus EST from mild drought-stressed leaves	sp|Q8VYE2|TIM50_ARATH	76.6	8e-15	Mitochondrial import inner membrane translocase subunit TIM50 OS=Arabidopsis thaliana GN=TIM50 PE=1 SV=1
CL10138.Contig1_All	826	170	11.472	179	12.4805	gi|224141135|ref|XP_002323930.1|	427.6	1e-118	predicted protein [Populus trichocarpa] >gi|222866932|gb|EEF04063.1| predicted protein [Populus trichocarpa]	gi|164663925|gb|AC216601.1|	880	0	Populus trichocarpa clone POP091-G07, complete sequence	sp|Q8GXL7|GAT24_ARATH	117	8e-27	GATA transcription factor 24 OS=Arabidopsis thaliana GN=GATA24 PE=2 SV=2
CL10138.Contig2_All	1577	389	13.7496	423	15.4478	gi|224141135|ref|XP_002323930.1|	667.5	0	predicted protein [Populus trichocarpa] >gi|222866932|gb|EEF04063.1| predicted protein [Populus trichocarpa]	gi|164663925|gb|AC216601.1|	864	0	Populus trichocarpa clone POP091-G07, complete sequence	sp|Q8GXL7|GAT24_ARATH	181	8e-46	GATA transcription factor 24 OS=Arabidopsis thaliana GN=GATA24 PE=2 SV=2
CL10139.Contig1_All	465	32	3.8359	27	3.344	gi|224128348|ref|XP_002320307.1|	294.7	3e-79	predicted protein [Populus trichocarpa] >gi|222861080|gb|EEE98622.1| predicted protein [Populus trichocarpa]	gi|147861777|emb|AM456916.2|	60	2e-06	Vitis vinifera contig VV78X171121.10, whole genome shotgun sequence	sp|O04716|MSH6_ARATH	144	2e-35	DNA mismatch repair protein MSH6 OS=Arabidopsis thaliana GN=MSH6 PE=1 SV=2
CL10139.Contig2_All	486	41	4.7024	18	2.133	gi|224128348|ref|XP_002320307.1|	323.2	1e-87	predicted protein [Populus trichocarpa] >gi|222861080|gb|EEE98622.1| predicted protein [Populus trichocarpa]	gi|147861777|emb|AM456916.2|	63.9	1e-07	Vitis vinifera contig VV78X171121.10, whole genome shotgun sequence	sp|O04716|MSH6_ARATH	140	3e-34	DNA mismatch repair protein MSH6 OS=Arabidopsis thaliana GN=MSH6 PE=1 SV=2
CL1014.Contig1_All	996	1013	56.692	1098	63.4895	gi|224124022|ref|XP_002319225.1|	321.6	1e-86	predicted protein [Populus trichocarpa] >gi|222857601|gb|EEE95148.1| predicted protein [Populus trichocarpa]	gi|118485057|gb|EF146308.1|	420	1e-114	Populus trichocarpa clone WS0117_A05	--	--	--	--
CL1014.Contig2_All	244	32	7.3102	20	4.7206	--	--	--	--	gi|224124021|ref|XM_002319189.1|	276	1e-71	Populus trichocarpa predicted protein, mRNA	--	--	--	--
CL10140.Contig1_All	2528	445	9.8119	338	7.7001	gi|224099073|ref|XP_002311365.1|	1680.6	0	predicted protein [Populus trichocarpa] >gi|222851185|gb|EEE88732.1| predicted protein [Populus trichocarpa]	gi|359477628|ref|XM_002274415.2|	274	4e-70	PREDICTED: Vitis vinifera uncharacterized LOC100258011 (LOC100258011), mRNA	--	--	--	--
CL10140.Contig2_All	766	21	1.5281	18	1.3533	gi|224099073|ref|XP_002311365.1|	501.9	4e-141	predicted protein [Populus trichocarpa] >gi|222851185|gb|EEE88732.1| predicted protein [Populus trichocarpa]	gi|359477628|ref|XM_002274415.2|	159	5e-36	PREDICTED: Vitis vinifera uncharacterized LOC100258011 (LOC100258011), mRNA	--	--	--	--
CL10141.Contig1_All	720	429	33.2121	386	30.8755	gi|224060471|ref|XP_002300216.1|	317	1e-85	predicted protein [Populus trichocarpa] >gi|222847474|gb|EEE85021.1| predicted protein [Populus trichocarpa]	gi|160949113|emb|CU233660.1|	291	5e-76	Populus EST from severe drought-stressed opposite wood	sp|P0CB26|Y1089_ARATH	206	1e-53	Uncharacterized protein At1g10890 OS=Arabidopsis thaliana GN=At1g10890 PE=1 SV=1
CL10141.Contig2_All	1088	200	10.2464	188	9.9515	gi|224126747|ref|XP_002329463.1|	532.3	5e-150	predicted protein [Populus trichocarpa] >gi|222870143|gb|EEF07274.1| predicted protein [Populus trichocarpa]	gi|160949113|emb|CU233660.1|	545	1e-152	Populus EST from severe drought-stressed opposite wood	sp|P0CB26|Y1089_ARATH	252	2e-67	Uncharacterized protein At1g10890 OS=Arabidopsis thaliana GN=At1g10890 PE=1 SV=1
CL10141.Contig3_All	377	130	19.2209	135	20.623	gi|224126747|ref|XP_002329463.1|	192.2	2e-48	predicted protein [Populus trichocarpa] >gi|222870143|gb|EEF07274.1| predicted protein [Populus trichocarpa]	gi|160949113|emb|CU233660.1|	694	0	Populus EST from severe drought-stressed opposite wood	sp|P0CB26|Y1089_ARATH	87	3e-18	Uncharacterized protein At1g10890 OS=Arabidopsis thaliana GN=At1g10890 PE=1 SV=1
CL10142.Contig1_All	200	29	8.0824	19	5.4712	--	--	--	--	--	--	--	--	--	--	--	--
CL10142.Contig2_All	214	19	4.9489	21	5.6515	--	--	--	--	--	--	--	--	--	--	--	--
CL10143.Contig1_All	250	18	4.0133	18	4.1466	gi|224134843|ref|XP_002327503.1|	126.7	1e-28	predicted protein [Populus trichocarpa] >gi|222836057|gb|EEE74478.1| predicted protein [Populus trichocarpa]	gi|224134842|ref|XM_002327467.1|	220	5e-55	Populus trichocarpa predicted protein, mRNA	sp|Q9FLX8|WRK27_ARATH	51.2	1e-07	Probable WRKY transcription factor 27 OS=Arabidopsis thaliana GN=WRKY27 PE=2 SV=1
CL10143.Contig2_All	598	172	16.0324	225	21.6691	gi|224134843|ref|XP_002327503.1|	343.6	1e-93	predicted protein [Populus trichocarpa] >gi|222836057|gb|EEE74478.1| predicted protein [Populus trichocarpa]	gi|449506802|ref|XM_004162805.1|	85.7	5e-14	PREDICTED: Cucumis sativus probable WRKY transcription factor 35-like (LOC101228638), mRNA	sp|Q9FLX8|WRK27_ARATH	134	5e-32	Probable WRKY transcription factor 27 OS=Arabidopsis thaliana GN=WRKY27 PE=2 SV=1
CL10144.Contig1_All	308	41	7.42	45	8.4144	--	--	--	--	--	--	--	--	--	--	--	--
CL10144.Contig2_All	515	378	40.9125	274	30.641	gi|255548407|ref|XP_002515260.1|	93.2	2e-18	pentatricopeptide repeat-containing protein, putative [Ricinus communis] >gi|223545740|gb|EEF47244.1| pentatricopeptide repeat-containing protein, putative [Ricinus communis]	gi|224130971|ref|XM_002320934.1|	260	1e-66	Populus trichocarpa predicted protein, mRNA	sp|Q9T0K5|LRX3_ARATH	40.4	7e-08	Leucine-rich repeat extensin-like protein 3 OS=Arabidopsis thaliana GN=LRX3 PE=1 SV=1
CL10145.Contig1_All	487	145	16.5963	101	11.944	gi|224067988|ref|XP_002302633.1|	298.5	2e-80	predicted protein [Populus trichocarpa] >gi|222844359|gb|EEE81906.1| predicted protein [Populus trichocarpa]	gi|470141904|ref|XM_004306617.1|	119	3e-24	PREDICTED: Fragaria vesca subsp. vesca UV-stimulated scaffold protein A homolog (LOC101311900), mRNA	sp|Q9M358|UVSSA_ARATH	199	9e-52	UV-stimulated scaffold protein A homolog OS=Arabidopsis thaliana GN=At3g61800 PE=3 SV=1
CL10146.Contig1_All	615	120	10.8762	99	9.2708	gi|225426014|ref|XP_002271107.1|	196.8	2e-49	PREDICTED: uncharacterized protein LOC100243335 [Vitis vinifera]	gi|156119664|gb|AC208495.1|	383	1e-103	Populus trichocarpa clone JGIACSB265-L15, complete sequence	--	--	--	--
CL10146.Contig2_All	286	28	5.4571	12	2.4164	gi|225426014|ref|XP_002271107.1|	87	9e-17	PREDICTED: uncharacterized protein LOC100243335 [Vitis vinifera]	gi|156119664|gb|AC208495.1|	527	1e-147	Populus trichocarpa clone JGIACSB265-L15, complete sequence	--	--	--	--
CL10147.Contig1_All	789	100	7.0647	84	6.1314	gi|224060285|ref|XP_002300123.1|	380.9	1e-104	predicted protein [Populus trichocarpa] >gi|222847381|gb|EEE84928.1| predicted protein [Populus trichocarpa]	gi|156447071|gb|AC209004.1|	1237	0	Populus trichocarpa clone POP042-E15, complete sequence	--	--	--	--
CL10147.Contig2_All	299	52	9.694	39	7.5119	gi|224060285|ref|XP_002300123.1|	188.3	3e-47	predicted protein [Populus trichocarpa] >gi|222847381|gb|EEE84928.1| predicted protein [Populus trichocarpa]	gi|161789314|gb|AC215632.1|	414	1e-113	Populus trichocarpa clone POP074-O07, complete sequence	--	--	--	--
CL10148.Contig1_All	280	47	9.3565	46	9.4615	gi|224085473|ref|XP_002307587.1|	167.5	5e-41	predicted protein [Populus trichocarpa] >gi|222857036|gb|EEE94583.1| predicted protein [Populus trichocarpa]	gi|224062474|ref|XM_002300803.1|	159	2e-36	Populus trichocarpa f-box family protein, mRNA	--	--	--	--
CL10148.Contig2_All	495	87	9.7968	104	12.1001	gi|224062475|ref|XP_002300839.1|	275	3e-73	f-box family protein [Populus trichocarpa] >gi|222842565|gb|EEE80112.1| f-box family protein [Populus trichocarpa]	gi|224062474|ref|XM_002300803.1|	722	0	Populus trichocarpa f-box family protein, mRNA	sp|Q0WRC9|SKI17_ARATH	119	1e-27	F-box protein SKIP17 OS=Arabidopsis thaliana GN=SKIP17 PE=1 SV=1
CL10149.Contig1_All	1351	345	14.2343	341	14.5364	gi|224105679|ref|XP_002313898.1|	425.6	9e-118	predicted protein [Populus trichocarpa] >gi|222850306|gb|EEE87853.1| predicted protein [Populus trichocarpa]	gi|225428927|ref|XM_002262721.1|	69.9	7e-09	PREDICTED: Vitis vinifera uncharacterized LOC100249808 (LOC100249808), mRNA	sp|Q9M0R7|ATL39_ARATH	63.5	3e-10	RING-H2 finger protein ATL39 OS=Arabidopsis thaliana GN=ATL39 PE=2 SV=1
CL10149.Contig2_All	207	14	3.7699	14	3.8951	gi|224105679|ref|XP_002313898.1|	133.3	1e-30	predicted protein [Populus trichocarpa] >gi|222850306|gb|EEE87853.1| predicted protein [Populus trichocarpa]	gi|460369733|ref|XM_004230664.1|	60	9e-07	PREDICTED: Solanum lycopersicum uncharacterized LOC101244425 (LOC101244425), partial mRNA	sp|Q9ZT49|ATL45_ARATH	62	8e-11	RING-H2 finger protein ATL45 OS=Arabidopsis thaliana GN=ATL45 PE=2 SV=1
CL10149.Contig3_All	1238	243	10.941	225	10.467	gi|224105679|ref|XP_002313898.1|	454.1	2e-126	predicted protein [Populus trichocarpa] >gi|222850306|gb|EEE87853.1| predicted protein [Populus trichocarpa]	gi|225428927|ref|XM_002262721.1|	69.9	6e-09	PREDICTED: Vitis vinifera uncharacterized LOC100249808 (LOC100249808), mRNA	sp|Q9M0R7|ATL39_ARATH	63.5	2e-10	RING-H2 finger protein ATL39 OS=Arabidopsis thaliana GN=ATL39 PE=2 SV=1
CL1015.Contig1_All	954	1828	106.807	2050	123.755	gi|118488826|gb|ABK96223.1|	273.5	3e-72	unknown [Populus trichocarpa x Populus deltoides] >gi|118488997|gb|ABK96306.1| unknown [Populus trichocarpa x Populus deltoides] >gi|118489823|gb|ABK96711.1| unknown [Populus trichocarpa x Populus deltoides]	gi|160950016|emb|CU228786.1|	1144	0	Populus EST from severe drought-stressed leaves	sp|P06183|PSBR_SOLTU	222	3e-58	Photosystem II 10 kDa polypeptide, chloroplastic OS=Solanum tuberosum GN=PSBR PE=2 SV=1
CL1015.Contig2_All	1239	1692	76.1203	1927	89.5714	gi|118488826|gb|ABK96223.1|	242.3	1e-62	unknown [Populus trichocarpa x Populus deltoides] >gi|118488997|gb|ABK96306.1| unknown [Populus trichocarpa x Populus deltoides] >gi|118489823|gb|ABK96711.1| unknown [Populus trichocarpa x Populus deltoides]	gi|160949225|emb|CU222658.1|	680	0	Populus EST from leave	sp|P06183|PSBR_SOLTU	209	2e-54	Photosystem II 10 kDa polypeptide, chloroplastic OS=Solanum tuberosum GN=PSBR PE=2 SV=1
CL1015.Contig3_All	934	13776	822.144	14619	901.426	gi|118488826|gb|ABK96223.1|	272.7	6e-72	unknown [Populus trichocarpa x Populus deltoides] >gi|118488997|gb|ABK96306.1| unknown [Populus trichocarpa x Populus deltoides] >gi|118489823|gb|ABK96711.1| unknown [Populus trichocarpa x Populus deltoides]	gi|160950016|emb|CU228786.1|	1199	0	Populus EST from severe drought-stressed leaves	sp|P06183|PSBR_SOLTU	221	5e-58	Photosystem II 10 kDa polypeptide, chloroplastic OS=Solanum tuberosum GN=PSBR PE=2 SV=1
CL10150.Contig1_All	368	8	1.2118	10	1.565	gi|224091479|ref|XP_002309268.1|	232.6	1e-60	white-brown-complex ABC transporter family [Populus trichocarpa] >gi|222855244|gb|EEE92791.1| white-brown-complex ABC transporter family [Populus trichocarpa]	gi|224091478|ref|XM_002309232.1|	674	0	Populus trichocarpa white-brown-complex ABC transporter family, mRNA	sp|Q93YS4|AB22G_ARATH	136	3e-33	ABC transporter G family member 22 OS=Arabidopsis thaliana GN=ABCG22 PE=1 SV=1
CL10150.Contig2_All	437	27	3.4439	9	1.1861	gi|224138238|ref|XP_002322764.1|	240.7	5e-63	white-brown-complex ABC transporter family [Populus trichocarpa] >gi|222867394|gb|EEF04525.1| white-brown-complex ABC transporter family [Populus trichocarpa]	gi|115416756|emb|CT029638.1|	739	0	Poplar cDNA sequences	sp|Q93YS4|AB22G_ARATH	145	1e-35	ABC transporter G family member 22 OS=Arabidopsis thaliana GN=ABCG22 PE=1 SV=1
CL10150.Contig3_All	287	8	1.5537	3	0.602	gi|224091479|ref|XP_002309268.1|	178.7	2e-44	white-brown-complex ABC transporter family [Populus trichocarpa] >gi|222855244|gb|EEE92791.1| white-brown-complex ABC transporter family [Populus trichocarpa]	gi|224091478|ref|XM_002309232.1|	458	1e-126	Populus trichocarpa white-brown-complex ABC transporter family, mRNA	sp|Q93YS4|AB22G_ARATH	114	1e-26	ABC transporter G family member 22 OS=Arabidopsis thaliana GN=ABCG22 PE=1 SV=1
CL10151.Contig1_All	335	81	13.4776	76	13.0656	gi|224100305|ref|XP_002311824.1|	24.3	2e-10	predicted protein [Populus trichocarpa] >gi|222851644|gb|EEE89191.1| predicted protein [Populus trichocarpa]	gi|224100304|ref|XM_002311788.1|	165	4e-38	Populus trichocarpa predicted protein, mRNA	--	--	--	--
CL10152.Contig1_All	209	3	0.8001	3	0.8267	gi|224127492|ref|XP_002329291.1|	77.8	5e-14	predicted protein [Populus trichocarpa] >gi|222870745|gb|EEF07876.1| predicted protein [Populus trichocarpa]	gi|224127491|ref|XM_002329255.1|	188	1e-45	Populus trichocarpa predicted protein, mRNA	--	--	--	--
CL10152.Contig2_All	233	4	0.9569	11	2.7189	gi|224127492|ref|XP_002329291.1|	95.1	3e-19	predicted protein [Populus trichocarpa] >gi|222870745|gb|EEF07876.1| predicted protein [Populus trichocarpa]	gi|224127491|ref|XM_002329255.1|	224	3e-56	Populus trichocarpa predicted protein, mRNA	--	--	--	--
CL10153.Contig1_All	512	5	0.5443	1	0.1125	gi|224082402|ref|XP_002306680.1|	100.5	1e-20	predicted protein [Populus trichocarpa] >gi|222856129|gb|EEE93676.1| predicted protein [Populus trichocarpa]	gi|224082401|ref|XM_002306644.1|	270	1e-69	Populus trichocarpa predicted protein, mRNA	--	--	--	--
CL10153.Contig2_All	609	44	4.0272	21	1.9859	gi|224082402|ref|XP_002306680.1|	102.8	3e-21	predicted protein [Populus trichocarpa] >gi|222856129|gb|EEE93676.1| predicted protein [Populus trichocarpa]	gi|224082401|ref|XM_002306644.1|	274	1e-70	Populus trichocarpa predicted protein, mRNA	--	--	--	--
CL10154.Contig1_All	3328	720	12.0593	677	11.7156	gi|224134292|ref|XP_002327802.1|	1738.8	0	predicted protein [Populus trichocarpa] >gi|222836887|gb|EEE75280.1| predicted protein [Populus trichocarpa]	gi|359476698|ref|XM_002267478.2|	1249	0	PREDICTED: Vitis vinifera vam6/Vps39-like protein (LOC100265014), mRNA	--	--	--	--
CL10154.Contig2_All	303	30	5.5189	19	3.6114	gi|224134292|ref|XP_002327802.1|	197.2	6e-50	predicted protein [Populus trichocarpa] >gi|222836887|gb|EEE75280.1| predicted protein [Populus trichocarpa]	gi|460226207|gb|GABL01040100.1|	87.7	6e-15	TSA: Camelina sativa comp49986_c1_seq1 transcribed RNA sequence	--	--	--	--
CL10155.Contig1_All	416	62	8.3075	71	9.8293	gi|224099679|ref|XP_002311576.1|	257.3	5e-68	predicted protein [Populus trichocarpa] >gi|222851396|gb|EEE88943.1| predicted protein [Populus trichocarpa]	gi|470123520|ref|XM_004297725.1|	67.9	8e-09	PREDICTED: Fragaria vesca subsp. vesca uncharacterized LOC101301578 (LOC101301578), mRNA	--	--	--	--
CL10155.Contig2_All	299	32	5.9655	16	3.0818	gi|224111336|ref|XP_002315818.1|	193	1e-48	predicted protein [Populus trichocarpa] >gi|222864858|gb|EEF01989.1| predicted protein [Populus trichocarpa]	gi|224111335|ref|XM_002315782.1|	537	1e-150	Populus trichocarpa predicted protein, mRNA	--	--	--	--
CL10156.Contig1_All	1597	159	5.5496	139	5.0127	gi|224090085|ref|XP_002308935.1|	891.7	0	predicted protein [Populus trichocarpa] >gi|222854911|gb|EEE92458.1| predicted protein [Populus trichocarpa]	gi|359482181|ref|XM_002278515.2|	1152	0	PREDICTED: Vitis vinifera NADPH-dependent thioredoxin reductase 3-like (LOC100262307), mRNA	sp|O22229|TRXB3_ARATH	820	0	NADPH-dependent thioredoxin reductase 3 OS=Arabidopsis thaliana GN=NTRC PE=1 SV=2
CL10156.Contig2_All	1620	85	2.9247	45	1.5998	gi|224090085|ref|XP_002308935.1|	390.2	0	predicted protein [Populus trichocarpa] >gi|222854911|gb|EEE92458.1| predicted protein [Populus trichocarpa]	gi|349727020|emb|FQ382829.1|	1150	0	Vitis vinifera clone SS0ABG41YN04	sp|O22229|TRXB3_ARATH	456	0	NADPH-dependent thioredoxin reductase 3 OS=Arabidopsis thaliana GN=NTRC PE=1 SV=2
CL10157.Contig1_All	476	110	12.8812	96	11.6151	--	--	--	--	gi|157311802|gb|AC210344.1|	85.7	4e-14	Populus trichocarpa clone POP100-P10, complete sequence	--	--	--	--
CL10158.Contig1_All	779	91	6.5114	100	7.393	gi|224127951|ref|XP_002320204.1|	414.8	7e-115	AP2/ERF domain-containing transcription factor [Populus trichocarpa] >gi|148372091|gb|ABQ62977.1| TINY-like protein [Populus trichocarpa] >gi|222860977|gb|EEE98519.1| AP2/ERF domain-containing transcription factor [Populus trichocarpa]	gi|224127950|ref|XM_002320168.1|	1396	0	Populus trichocarpa AP2/ERF domain-containing transcription factor (DREB56), mRNA	sp|Q1ECI2|ERF23_ARATH	213	1e-55	Ethylene-responsive transcription factor ERF023 OS=Arabidopsis thaliana GN=ERF023 PE=2 SV=1
CL10159.Contig1_All	712	122	9.5511	93	7.5225	gi|224127290|ref|XP_002329241.1|	452.2	3e-126	predicted protein [Populus trichocarpa] >gi|222870695|gb|EEF07826.1| predicted protein [Populus trichocarpa]	gi|470136829|ref|XM_004304137.1|	444	1e-122	PREDICTED: Fragaria vesca subsp. vesca DNA-directed RNA polymerase 2, chloroplastic/mitochondrial-like (LOC101306253), mRNA	sp|Q8L6J3|RPO2B_TOBAC	405	1e-113	DNA-directed RNA polymerase 2B, chloroplastic/mitochondrial OS=Nicotiana tabacum GN=RPOT2-TOM PE=2 SV=2
CL1016.Contig1_All	1545	427	15.4053	380	14.1649	gi|224123500|ref|XP_002319093.1|	580.1	3e-164	predicted protein [Populus trichocarpa] >gi|222857469|gb|EEE95016.1| predicted protein [Populus trichocarpa]	gi|156255261|gb|AC208941.1|	113	6e-22	Populus trichocarpa clone JGIACSB1085-L15, complete sequence	sp|Q9S7C9|ESCA_ARATH	77.8	2e-14	Putative DNA-binding protein ESCAROLA OS=Arabidopsis thaliana GN=ESC PE=2 SV=1
CL1016.Contig2_All	1511	197	7.2673	188	7.1656	gi|118484865|gb|ABK94299.1|	697.2	0	unknown [Populus trichocarpa]	gi|156255261|gb|AC208941.1|	309	5e-81	Populus trichocarpa clone JGIACSB1085-L15, complete sequence	sp|Q9S7C9|ESCA_ARATH	77.8	2e-14	Putative DNA-binding protein ESCAROLA OS=Arabidopsis thaliana GN=ESC PE=2 SV=1
CL1016.Contig3_All	504	85	9.4007	97	11.0841	gi|224116000|ref|XP_002332023.1|	170.2	1e-41	predicted protein [Populus trichocarpa] >gi|222875248|gb|EEF12379.1| predicted protein [Populus trichocarpa]	gi|27228806|gb|AC134232.2|	58	9e-06	Oryza sativa Japonica Group chromosome 3 clone OSJNBa0013D02, complete sequence	--	--	--	--
CL10160.Contig1_All	2400	258	5.9921	222	5.3272	gi|224098187|ref|XP_002311132.1|	1169.8	0	predicted protein [Populus trichocarpa] >gi|222850952|gb|EEE88499.1| predicted protein [Populus trichocarpa]	gi|359486437|ref|XM_002275903.2|	196	8e-47	PREDICTED: Vitis vinifera uncharacterized LOC100244989 (LOC100244989), mRNA	sp|Q9LFE4|Y5673_ARATH	60.5	4e-09	WEB family protein At5g16730, chloroplastic OS=Arabidopsis thaliana GN=At5g16730 PE=1 SV=1
CL10160.Contig2_All	2367	359	8.4541	319	7.7616	gi|224098187|ref|XP_002311132.1|	1145.2	0	predicted protein [Populus trichocarpa] >gi|222850952|gb|EEE88499.1| predicted protein [Populus trichocarpa]	gi|356536513|ref|XM_003536734.1|	180	4e-42	PREDICTED: Glycine max uncharacterized protein LOC100778459 (LOC100778459), mRNA	sp|Q9LFE4|Y5673_ARATH	58.9	1e-08	WEB family protein At5g16730, chloroplastic OS=Arabidopsis thaliana GN=At5g16730 PE=1 SV=1
CL10161.Contig1_All	695	162	12.9928	190	15.7445	gi|255558724|ref|XP_002520386.1|	247.3	1e-64	catalytic, putative [Ricinus communis] >gi|223540433|gb|EEF42002.1| catalytic, putative [Ricinus communis]	gi|160952437|emb|CU224088.1|	1078	0	Populus EST from leave	--	--	--	--
CL10161.Contig2_All	405	49	6.7439	57	8.1055	gi|255558724|ref|XP_002520386.1|	55.1	1e-29	catalytic, putative [Ricinus communis] >gi|223540433|gb|EEF42002.1| catalytic, putative [Ricinus communis]	gi|160952437|emb|CU224088.1|	216	1e-53	Populus EST from leave	--	--	--	--
CL10162.Contig1_All	1307	227	9.681	230	10.1347	gi|224075525|ref|XP_002304666.1|	604	1e-171	predicted protein [Populus trichocarpa] >gi|118487518|gb|ABK95586.1| unknown [Populus trichocarpa] >gi|222842098|gb|EEE79645.1| predicted protein [Populus trichocarpa]	gi|359473790|ref|XM_002266373.2|	418	1e-114	PREDICTED: Vitis vinifera uncharacterized LOC100255676 (LOC100255676), mRNA	--	--	--	--
CL10162.Contig2_All	999	15	0.8369	12	0.6918	gi|224075525|ref|XP_002304666.1|	498.8	5e-140	predicted protein [Populus trichocarpa] >gi|118487518|gb|ABK95586.1| unknown [Populus trichocarpa] >gi|222842098|gb|EEE79645.1| predicted protein [Populus trichocarpa]	gi|359473790|ref|XM_002266373.2|	365	6e-98	PREDICTED: Vitis vinifera uncharacterized LOC100255676 (LOC100255676), mRNA	--	--	--	--
CL10163.Contig1_All	498	75	8.3947	75	8.6734	gi|224125222|ref|XP_002319530.1|	255.4	2e-67	predicted protein [Populus trichocarpa] >gi|222857906|gb|EEE95453.1| predicted protein [Populus trichocarpa]	gi|428754001|gb|JX866760.1|	220	1e-54	Vernicia fordii acyl-CoA binding protein 4 (ACBP4) mRNA, complete cds	sp|Q9MA55|ACBP4_ARATH	187	3e-48	Acyl-CoA-binding domain-containing protein 4 OS=Arabidopsis thaliana GN=ACBP4 PE=1 SV=1
CL10163.Contig2_All	595	61	5.7146	74	7.1627	gi|224125222|ref|XP_002319530.1|	269.2	2e-71	predicted protein [Populus trichocarpa] >gi|222857906|gb|EEE95453.1| predicted protein [Populus trichocarpa]	gi|428754001|gb|JX866760.1|	252	4e-64	Vernicia fordii acyl-CoA binding protein 4 (ACBP4) mRNA, complete cds	sp|Q9MA55|ACBP4_ARATH	204	2e-53	Acyl-CoA-binding domain-containing protein 4 OS=Arabidopsis thaliana GN=ACBP4 PE=1 SV=1
CL10164.Contig1_All	2446	62	1.4129	44	1.036	gi|224113965|ref|XP_002316628.1|	1278.5	0	PAF1 complex component [Populus trichocarpa] >gi|222859693|gb|EEE97240.1| PAF1 complex component [Populus trichocarpa]	gi|165905722|gb|AC216691.1|	4159	0	Populus trichocarpa clone POP102-M12, complete sequence	sp|Q7XTT4|NUCL2_ORYSJ	52.4	1e-06	Nucleolin 2 OS=Oryza sativa subsp. japonica GN=Os04g0620700 PE=2 SV=2
CL10164.Contig2_All	2266	271	6.6662	221	5.6168	gi|224113965|ref|XP_002316628.1|	1269.6	0	PAF1 complex component [Populus trichocarpa] >gi|222859693|gb|EEE97240.1| PAF1 complex component [Populus trichocarpa]	gi|165905722|gb|AC216691.1|	3509	0	Populus trichocarpa clone POP102-M12, complete sequence	sp|O80560|IP5PC_ARATH	51.6	2e-06	Type I inositol 1,4,5-trisphosphate 5-phosphatase 12 OS=Arabidopsis thaliana GN=5PTASE12 PE=1 SV=1
CL10164.Contig3_All	2306	54	1.3053	39	0.974	gi|224113965|ref|XP_002316628.1|	1278.5	0	PAF1 complex component [Populus trichocarpa] >gi|222859693|gb|EEE97240.1| PAF1 complex component [Populus trichocarpa]	gi|165905722|gb|AC216691.1|	3776	0	Populus trichocarpa clone POP102-M12, complete sequence	sp|Q7XTT4|NUCL2_ORYSJ	52.4	1e-06	Nucleolin 2 OS=Oryza sativa subsp. japonica GN=Os04g0620700 PE=2 SV=2
CL10164.Contig4_All	534	104	10.8558	97	10.4614	gi|224078932|ref|XP_002305685.1|	274.6	5e-73	PAF1 complex component [Populus trichocarpa] >gi|222848649|gb|EEE86196.1| PAF1 complex component [Populus trichocarpa]	gi|224078931|ref|XM_002305649.1|	789	0	Populus trichocarpa PAF1 complex component (PAFD901), mRNA	--	--	--	--
CL10165.Contig1_All	914	122	7.4402	153	9.6406	gi|224059873|ref|XP_002300005.1|	556.2	2e-157	predicted protein [Populus trichocarpa] >gi|222847263|gb|EEE84810.1| predicted protein [Populus trichocarpa]	gi|225434452|ref|XM_002273482.1|	327	1e-86	PREDICTED: Vitis vinifera probable protein phosphatase 2C 26-like (LOC100267390), mRNA	sp|O64730|P2C26_ARATH	353	6e-98	Probable protein phosphatase 2C 26 OS=Arabidopsis thaliana GN=At2g30170 PE=2 SV=2
CL10165.Contig2_All	315	8	1.4156	18	3.2909	gi|224059873|ref|XP_002300005.1|	162.5	1e-39	predicted protein [Populus trichocarpa] >gi|222847263|gb|EEE84810.1| predicted protein [Populus trichocarpa]	gi|225434452|ref|XM_002273482.1|	157	8e-36	PREDICTED: Vitis vinifera probable protein phosphatase 2C 26-like (LOC100267390), mRNA	sp|O64730|P2C26_ARATH	121	1e-28	Probable protein phosphatase 2C 26 OS=Arabidopsis thaliana GN=At2g30170 PE=2 SV=2
CL10166.Contig1_All	850	142	9.312	151	10.231	gi|224120374|ref|XP_002331032.1|	490.7	1e-137	predicted protein [Populus trichocarpa] >gi|222872962|gb|EEF10093.1| predicted protein [Populus trichocarpa]	gi|359481890|ref|XM_002283024.2|	535	1e-149	PREDICTED: Vitis vinifera chaperone protein dnaJ 6-like (LOC100265910), mRNA	sp|Q9FL54|DNAJ6_ARATH	340	8e-94	Chaperone protein dnaJ 6 OS=Arabidopsis thaliana GN=ATJ6 PE=1 SV=1
CL10166.Contig2_All	268	32	6.6556	45	9.6702	gi|224137970|ref|XP_002322697.1|	175.6	2e-43	predicted protein [Populus trichocarpa] >gi|222867327|gb|EEF04458.1| predicted protein [Populus trichocarpa]	gi|349727049|emb|FQ382858.1|	234	4e-59	Vitis vinifera clone SS0ABG40YL17	sp|Q9FL54|DNAJ6_ARATH	130	2e-31	Chaperone protein dnaJ 6 OS=Arabidopsis thaliana GN=ATJ6 PE=1 SV=1
CL10167.Contig1_All	447	58	7.2326	61	7.8593	--	--	--	--	gi|224141716|ref|XM_002324175.1|	404	1e-110	Populus trichocarpa predicted protein, mRNA	--	--	--	--
CL10167.Contig2_All	3043	1046	19.1603	946	17.9039	gi|224141717|ref|XP_002324211.1|	1214.5	0	predicted protein [Populus trichocarpa] >gi|222865645|gb|EEF02776.1| predicted protein [Populus trichocarpa]	gi|359475912|ref|XM_002272643.2|	1522	0	PREDICTED: Vitis vinifera uncharacterized LOC100254265 (LOC100254265), mRNA	sp|P42158|KC1D_ARATH	190	4e-48	Casein kinase I isoform delta-like OS=Arabidopsis thaliana GN=At4g26100 PE=2 SV=2
CL10168.Contig1_All	284	33	6.4769	25	5.0697	--	--	--	--	gi|224141082|ref|XM_002323868.1|	460	1e-127	Populus trichocarpa predicted protein, mRNA	--	--	--	--
CL10168.Contig2_All	781	100	7.1371	93	6.8579	gi|224077734|ref|XP_002305385.1|	389.8	2e-107	predicted protein [Populus trichocarpa] >gi|222848349|gb|EEE85896.1| predicted protein [Populus trichocarpa]	gi|225451728|ref|XM_002276996.1|	63.9	2e-07	PREDICTED: Vitis vinifera uncharacterized LOC100246447 (LOC100246447), mRNA	--	--	--	--
CL10169.Contig1_All	955	79	4.611	70	4.2214	gi|255541548|ref|XP_002511838.1|	387.5	1e-106	synaptotagmin, putative [Ricinus communis] >gi|223549018|gb|EEF50507.1| synaptotagmin, putative [Ricinus communis]	gi|359489832|ref|XM_002271554.2|	157	3e-35	PREDICTED: Vitis vinifera multiple C2 and transmembrane domain-containing protein 1-like (LOC100253432), mRNA	sp|Q9SKR2|SYT1_ARATH	48.9	4e-06	Synaptotagmin-1 OS=Arabidopsis thaliana GN=SYT1 PE=1 SV=2
CL10169.Contig2_All	1327	128	5.3766	99	4.2966	gi|255541548|ref|XP_002511838.1|	502.3	7e-141	synaptotagmin, putative [Ricinus communis] >gi|223549018|gb|EEF50507.1| synaptotagmin, putative [Ricinus communis]	gi|470142192|ref|XM_004306751.1|	192	7e-46	PREDICTED: Fragaria vesca subsp. vesca uncharacterized LOC101305880 (LOC101305880), mRNA	sp|Q9FGS8|C2GR2_ARATH	49.7	4e-06	C2 and GRAM domain-containing protein At5g50170 OS=Arabidopsis thaliana GN=At5g50170 PE=2 SV=1
CL1017.Contig1_All	1687	480	15.8598	433	14.782	gi|255581254|ref|XP_002531439.1|	124.8	0	Protein kinase APK1B, chloroplast precursor, putative [Ricinus communis] >gi|223528958|gb|EEF30951.1| Protein kinase APK1B, chloroplast precursor, putative [Ricinus communis]	gi|359478937|ref|XM_002283562.2|	535	1e-149	PREDICTED: Vitis vinifera probable receptor-like protein kinase At5g47070-like (LOC100258611), mRNA	sp|Q9LTC0|Y5707_ARATH	296	2e-92	Probable receptor-like protein kinase At5g47070 OS=Arabidopsis thaliana GN=At5g47070 PE=1 SV=1
CL1017.Contig2_All	262	29	6.1698	22	4.8359	gi|255581254|ref|XP_002531439.1|	135.2	3e-31	Protein kinase APK1B, chloroplast precursor, putative [Ricinus communis] >gi|223528958|gb|EEF30951.1| Protein kinase APK1B, chloroplast precursor, putative [Ricinus communis]	gi|359478937|ref|XM_002283562.2|	73.8	8e-11	PREDICTED: Vitis vinifera probable receptor-like protein kinase At5g47070-like (LOC100258611), mRNA	sp|Q9LTC0|Y5707_ARATH	64.7	1e-11	Probable receptor-like protein kinase At5g47070 OS=Arabidopsis thaliana GN=At5g47070 PE=1 SV=1
CL1017.Contig3_All	286	15	2.9235	8	1.611	gi|255581254|ref|XP_002531439.1|	129	2e-29	Protein kinase APK1B, chloroplast precursor, putative [Ricinus communis] >gi|223528958|gb|EEF30951.1| Protein kinase APK1B, chloroplast precursor, putative [Ricinus communis]	--	--	--	--	sp|Q9LTC0|Y5707_ARATH	62	8e-11	Probable receptor-like protein kinase At5g47070 OS=Arabidopsis thaliana GN=At5g47070 PE=1 SV=1
CL1017.Contig4_All	405	113	15.5523	93	13.2247	gi|224054716|ref|XP_002298354.1|	261.2	3e-69	predicted protein [Populus trichocarpa] >gi|222845612|gb|EEE83159.1| predicted protein [Populus trichocarpa]	gi|147772559|emb|AM441846.2|	81.8	5e-13	Vitis vinifera contig VV78X013920.2, whole genome shotgun sequence	sp|Q9LFP7|Y5158_ARATH	78.2	1e-15	Probable receptor-like protein kinase At5g15080 OS=Arabidopsis thaliana GN=At5g15080 PE=1 SV=1
CL10170.Contig1_All	588	144	13.6508	127	12.439	gi|224066781|ref|XP_002302212.1|	414.1	7e-115	predicted protein [Populus trichocarpa] >gi|222843938|gb|EEE81485.1| predicted protein [Populus trichocarpa]	gi|123706886|emb|AM484113.1|	91.7	8e-16	Vitis vinifera, whole genome shotgun sequence, contig VV78X030754.11, clone ENTAV 115	sp|Q9SGH2|MBD9_ARATH	53.1	1e-07	Methyl-CpG-binding domain-containing protein 9 OS=Arabidopsis thaliana GN=MBD9 PE=2 SV=1
CL10170.Contig2_All	1841	23	0.6964	13	0.4067	gi|224082358|ref|XP_002306661.1|	931.8	0	predicted protein [Populus trichocarpa] >gi|222856110|gb|EEE93657.1| predicted protein [Populus trichocarpa]	gi|123706886|emb|AM484113.1|	127	4e-26	Vitis vinifera, whole genome shotgun sequence, contig VV78X030754.11, clone ENTAV 115	sp|Q9SGH2|MBD9_ARATH	72.4	8e-13	Methyl-CpG-binding domain-containing protein 9 OS=Arabidopsis thaliana GN=MBD9 PE=2 SV=1
CL10170.Contig3_All	2428	242	5.5557	191	4.5305	gi|224082358|ref|XP_002306661.1|	1014.2	0	predicted protein [Populus trichocarpa] >gi|222856110|gb|EEE93657.1| predicted protein [Populus trichocarpa]	gi|357595437|gb|JN192334.1|	208	2e-50	Populus tomentosa clone ZDQSSR147 microsatellite sequence	sp|Q9SGH2|MBD9_ARATH	72.4	1e-12	Methyl-CpG-binding domain-containing protein 9 OS=Arabidopsis thaliana GN=MBD9 PE=2 SV=1
CL10171.Contig1_All	1278	485	21.1535	356	16.0427	gi|470122499|ref|XP_004297278.1|	393.3	4e-108	PREDICTED: uncharacterized protein LOC101298217 [Fragaria vesca subsp. vesca]	gi|94402946|gb|AC182667.2|	852	0	Populus trichocarpa clone Pop1-18L12, complete sequence	--	--	--	--
CL10171.Contig2_All	805	91	6.3011	52	3.7202	gi|470122499|ref|XP_004297278.1|	253.1	3e-66	PREDICTED: uncharacterized protein LOC101298217 [Fragaria vesca subsp. vesca]	gi|94402946|gb|AC182667.2|	850	0	Populus trichocarpa clone Pop1-18L12, complete sequence	--	--	--	--
CL10172.Contig1_All	437	33	4.2092	29	3.8219	gi|224142834|ref|XP_002324746.1|	230.7	5e-60	predicted protein [Populus trichocarpa] >gi|222866180|gb|EEF03311.1| predicted protein [Populus trichocarpa]	gi|82621129|gb|DQ284465.1|	176	1e-41	Solanum tuberosum clone 096G02 3'-5' exonuclease domain-containing protein-like mRNA, complete cds	--	--	--	--
CL10172.Contig2_All	1412	2802	110.613	3007	122.647	gi|224088954|ref|XP_002308585.1|	662.5	0	predicted protein [Populus trichocarpa] >gi|222854561|gb|EEE92108.1| predicted protein [Populus trichocarpa]	gi|349708179|emb|FQ395637.1|	618	1e-174	Vitis vinifera clone SS0AFA14YN18	--	--	--	--
CL10173.Contig1_All	339	45	7.3992	24	4.0773	gi|224077722|ref|XP_002305379.1|	209.1	1e-53	predicted protein [Populus trichocarpa] >gi|222848343|gb|EEE85890.1| predicted protein [Populus trichocarpa]	gi|224077721|ref|XM_002305343.1|	559	1e-157	Populus trichocarpa predicted protein, mRNA	--	--	--	--
CL10173.Contig2_All	510	103	11.2574	51	5.7592	gi|224141035|ref|XP_002323880.1|	198	5e-50	predicted protein [Populus trichocarpa] >gi|222866882|gb|EEF04013.1| predicted protein [Populus trichocarpa]	gi|224116617|ref|XM_002317312.1|	60	2e-06	Populus trichocarpa cation-chloride cotransporter (PtrCCC1), mRNA	--	--	--	--
CL10174.Contig1_All	1287	253	10.9576	221	9.8895	gi|224056459|ref|XP_002298867.1|	329.7	6e-89	predicted protein [Populus trichocarpa] >gi|222846125|gb|EEE83672.1| predicted protein [Populus trichocarpa]	gi|159459641|gb|AC214028.1|	1871	0	Populus trichocarpa clone POP025-N21, complete sequence	sp|O23310|NFYB3_ARATH	216	2e-56	Nuclear transcription factor Y subunit B-3 OS=Arabidopsis thaliana GN=NFYB3 PE=2 SV=1
CL10174.Contig2_All	1285	66	2.8629	53	2.3754	gi|224056459|ref|XP_002298867.1|	329.7	6e-89	predicted protein [Populus trichocarpa] >gi|222846125|gb|EEE83672.1| predicted protein [Populus trichocarpa]	gi|159459641|gb|AC214028.1|	1867	0	Populus trichocarpa clone POP025-N21, complete sequence	sp|O23310|NFYB3_ARATH	216	2e-56	Nuclear transcription factor Y subunit B-3 OS=Arabidopsis thaliana GN=NFYB3 PE=2 SV=1
CL10175.Contig1_All	203	24	6.59	12	3.4044	--	--	--	--	--	--	--	--	--	--	--	--
CL10175.Contig2_All	204	26	7.1042	13	3.6701	--	--	--	--	--	--	--	--	--	--	--	--
CL10176.Contig1_All	543	68	6.9804	63	6.6819	gi|224061324|ref|XP_002300426.1|	164.5	8e-40	predicted protein [Populus trichocarpa] >gi|222847684|gb|EEE85231.1| predicted protein [Populus trichocarpa]	gi|470115861|ref|XM_004294062.1|	113	2e-22	PREDICTED: Fragaria vesca subsp. vesca interactor of constitutive active ROPs 1-like, transcript variant 2 (LOC101296752), mRNA	sp|Q9M9F9|ICR4_ARATH	83.2	8e-17	Interactor of constitutive active ROPs 4 OS=Arabidopsis thaliana GN=ICR4 PE=3 SV=2
CL10176.Contig2_All	349	7	1.118	3	0.4951	gi|224061324|ref|XP_002300426.1|	164.5	4e-40	predicted protein [Populus trichocarpa] >gi|222847684|gb|EEE85231.1| predicted protein [Populus trichocarpa]	gi|470115861|ref|XM_004294062.1|	113	1e-22	PREDICTED: Fragaria vesca subsp. vesca interactor of constitutive active ROPs 1-like, transcript variant 2 (LOC101296752), mRNA	sp|Q9M9F9|ICR4_ARATH	83.2	3e-17	Interactor of constitutive active ROPs 4 OS=Arabidopsis thaliana GN=ICR4 PE=3 SV=2
CL10177.Contig1_All	2231	190	4.7471	150	3.8721	gi|224055341|ref|XP_002298489.1|	1283.5	0	predicted protein [Populus trichocarpa] >gi|222845747|gb|EEE83294.1| predicted protein [Populus trichocarpa]	gi|14149115|dbj|AB061797.1|	1447	0	Bruguiera gymnorhiza f6p2k/f26p mRNA for fructose-6-phosphate 2-kinase/fructose-2,6-bisphosphatase, complete cds	sp|Q9MB58|F26_ARATH	998	0	6-phosphofructo-2-kinase/fructose-2,6-bisphosphatase OS=Arabidopsis thaliana GN=FKFBP PE=1 SV=1
CL10177.Contig2_All	559	117	11.6666	113	11.642	gi|224105931|ref|XP_002313982.1|	312.8	2e-84	predicted protein [Populus trichocarpa] >gi|222850390|gb|EEE87937.1| predicted protein [Populus trichocarpa]	gi|14149115|dbj|AB061797.1|	264	9e-68	Bruguiera gymnorhiza f6p2k/f26p mRNA for fructose-6-phosphate 2-kinase/fructose-2,6-bisphosphatase, complete cds	sp|Q9MB58|F26_ARATH	206	7e-54	6-phosphofructo-2-kinase/fructose-2,6-bisphosphatase OS=Arabidopsis thaliana GN=FKFBP PE=1 SV=1
CL10177.Contig3_All	2698	66	1.3636	42	0.8965	gi|224055341|ref|XP_002298489.1|	1443.7	0	predicted protein [Populus trichocarpa] >gi|222845747|gb|EEE83294.1| predicted protein [Populus trichocarpa]	gi|14149115|dbj|AB061797.1|	952	0	Bruguiera gymnorhiza f6p2k/f26p mRNA for fructose-6-phosphate 2-kinase/fructose-2,6-bisphosphatase, complete cds	sp|Q9MB58|F26_ARATH	1154	0	6-phosphofructo-2-kinase/fructose-2,6-bisphosphatase OS=Arabidopsis thaliana GN=FKFBP PE=1 SV=1
CL10177.Contig4_All	2633	22	0.4657	29	0.6343	gi|224055341|ref|XP_002298489.1|	1463.7	0	predicted protein [Populus trichocarpa] >gi|222845747|gb|EEE83294.1| predicted protein [Populus trichocarpa]	gi|14149115|dbj|AB061797.1|	1667	0	Bruguiera gymnorhiza f6p2k/f26p mRNA for fructose-6-phosphate 2-kinase/fructose-2,6-bisphosphatase, complete cds	sp|Q9MB58|F26_ARATH	1167	0	6-phosphofructo-2-kinase/fructose-2,6-bisphosphatase OS=Arabidopsis thaliana GN=FKFBP PE=1 SV=1
CL10177.Contig5_All	2042	9	0.2457	5	0.141	gi|224055341|ref|XP_002298489.1|	1037.3	0	predicted protein [Populus trichocarpa] >gi|222845747|gb|EEE83294.1| predicted protein [Populus trichocarpa]	gi|14149115|dbj|AB061797.1|	1065	0	Bruguiera gymnorhiza f6p2k/f26p mRNA for fructose-6-phosphate 2-kinase/fructose-2,6-bisphosphatase, complete cds	sp|Q9MB58|F26_ARATH	768	0	6-phosphofructo-2-kinase/fructose-2,6-bisphosphatase OS=Arabidopsis thaliana GN=FKFBP PE=1 SV=1
CL10177.Contig6_All	1466	11	0.4182	9	0.3536	gi|224055341|ref|XP_002298489.1|	803.9	0	predicted protein [Populus trichocarpa] >gi|222845747|gb|EEE83294.1| predicted protein [Populus trichocarpa]	gi|14149115|dbj|AB061797.1|	664	0	Bruguiera gymnorhiza f6p2k/f26p mRNA for fructose-6-phosphate 2-kinase/fructose-2,6-bisphosphatase, complete cds	sp|Q9MB58|F26_ARATH	553	7e-158	6-phosphofructo-2-kinase/fructose-2,6-bisphosphatase OS=Arabidopsis thaliana GN=FKFBP PE=1 SV=1
CL10177.Contig7_All	2126	12	0.3146	2	0.0542	gi|224055341|ref|XP_002298489.1|	1017.3	0	predicted protein [Populus trichocarpa] >gi|222845747|gb|EEE83294.1| predicted protein [Populus trichocarpa]	gi|14149115|dbj|AB061797.1|	952	0	Bruguiera gymnorhiza f6p2k/f26p mRNA for fructose-6-phosphate 2-kinase/fructose-2,6-bisphosphatase, complete cds	sp|Q9MB58|F26_ARATH	754	0	6-phosphofructo-2-kinase/fructose-2,6-bisphosphatase OS=Arabidopsis thaliana GN=FKFBP PE=1 SV=1
CL10178.Contig1_All	1752	559	17.7848	799	26.2647	gi|224121608|ref|XP_002330743.1|	875.9	0	predicted protein [Populus trichocarpa] >gi|222872519|gb|EEF09650.1| predicted protein [Populus trichocarpa]	gi|225463865|ref|XM_002267618.1|	367	3e-98	PREDICTED: Vitis vinifera bystin-like (LOC100251935), mRNA	--	--	--	--
CL10178.Contig2_All	214	13	3.3861	13	3.4986	gi|224117072|ref|XP_002317469.1|	142.1	2e-33	predicted protein [Populus trichocarpa] >gi|222860534|gb|EEE98081.1| predicted protein [Populus trichocarpa]	gi|224117071|ref|XM_002317433.1|	408	1e-112	Populus trichocarpa predicted protein, mRNA	--	--	--	--
CL10179.Contig1_All	1750	397	12.6452	447	14.7105	gi|224054781|ref|XP_002298363.1|	884.8	0	predicted protein [Populus trichocarpa] >gi|222845621|gb|EEE83168.1| predicted protein [Populus trichocarpa]	gi|335322892|gb|GU282805.1|	1080	0	Populus balsamifera isolate LOV02 haplotype B armadillo/betacatenin repeat family protein / Ubox domain-containing family protein gene, partial sequence >gi|335322906|gb|GU282819.1| Populus balsamifera isolate GIL14 haplotype B armadillo/betacatenin repeat family protein / Ubox domain-containing family protein gene, partial sequence	sp|Q9SNC6|PUB13_ARATH	654	0	U-box domain-containing protein 13 OS=Arabidopsis thaliana GN=PUB13 PE=1 SV=1
CL10179.Contig2_All	2540	838	18.39	664	15.0554	gi|224054781|ref|XP_002298363.1|	1218	0	predicted protein [Populus trichocarpa] >gi|222845621|gb|EEE83168.1| predicted protein [Populus trichocarpa]	gi|335322892|gb|GU282805.1|	1344	0	Populus balsamifera isolate LOV02 haplotype B armadillo/betacatenin repeat family protein / Ubox domain-containing family protein gene, partial sequence >gi|335322906|gb|GU282819.1| Populus balsamifera isolate GIL14 haplotype B armadillo/betacatenin repeat family protein / Ubox domain-containing family protein gene, partial sequence	sp|Q9SNC6|PUB13_ARATH	889	0	U-box domain-containing protein 13 OS=Arabidopsis thaliana GN=PUB13 PE=1 SV=1
CL1018.Contig1_All	3047	618	11.3054	481	9.0914	gi|224069018|ref|XP_002302880.1|	1443.7	0	predicted protein [Populus trichocarpa] >gi|222844606|gb|EEE82153.1| predicted protein [Populus trichocarpa]	gi|359485663|ref|XM_002273801.2|	1088	0	PREDICTED: Vitis vinifera homeobox-leucine zipper protein HDG2-like (LOC100261842), mRNA	sp|Q94C37|HDG2_ARATH	1176	0	Homeobox-leucine zipper protein HDG2 OS=Arabidopsis thaliana GN=HDG2 PE=2 SV=1
CL1018.Contig2_All	3633	615	9.4359	486	7.7042	gi|224128938|ref|XP_002320458.1|	1430.6	0	predicted protein [Populus trichocarpa] >gi|222861231|gb|EEE98773.1| predicted protein [Populus trichocarpa]	gi|359485663|ref|XM_002273801.2|	1126	0	PREDICTED: Vitis vinifera homeobox-leucine zipper protein HDG2-like (LOC100261842), mRNA	sp|Q94C37|HDG2_ARATH	1179	0	Homeobox-leucine zipper protein HDG2 OS=Arabidopsis thaliana GN=HDG2 PE=2 SV=1
CL1018.Contig3_All	224	15	3.7326	18	4.6279	gi|224069018|ref|XP_002302880.1|	149.1	2e-35	predicted protein [Populus trichocarpa] >gi|222844606|gb|EEE82153.1| predicted protein [Populus trichocarpa]	gi|165723349|gb|AC216677.1|	236	8e-60	Populus trichocarpa clone POP103-G02, complete sequence	sp|Q93V99|PDF2_ARATH	93.2	3e-20	Homeobox-leucine zipper protein PROTODERMAL FACTOR 2 OS=Arabidopsis thaliana GN=PDF2 PE=2 SV=1
CL10180.Contig1_All	1139	102	4.9917	69	3.4889	gi|224065913|ref|XP_002301982.1|	600.5	1e-170	predicted protein [Populus trichocarpa] >gi|222843708|gb|EEE81255.1| predicted protein [Populus trichocarpa]	gi|147839832|emb|AM468283.2|	165	1e-37	Vitis vinifera contig VV78X137860.11, whole genome shotgun sequence	--	--	--	--
CL10180.Contig2_All	823	20	1.3546	26	1.8194	gi|224065913|ref|XP_002301982.1|	371.7	7e-102	predicted protein [Populus trichocarpa] >gi|222843708|gb|EEE81255.1| predicted protein [Populus trichocarpa]	gi|363806669|ref|NM_001255077.1|	73.8	3e-10	Glycine max uncharacterized LOC100815137 (LOC100815137), mRNA	--	--	--	--
CL10181.Contig1_All	381	43	6.2909	42	6.3487	gi|224078982|ref|XP_002305706.1|	154.1	6e-37	predicted protein [Populus trichocarpa] >gi|222848670|gb|EEE86217.1| predicted protein [Populus trichocarpa]	gi|224078981|ref|XM_002305670.1|	527	1e-147	Populus trichocarpa predicted protein, mRNA	--	--	--	--
CL10181.Contig2_All	439	21	2.6664	51	6.6906	gi|224078982|ref|XP_002305706.1|	198.4	2e-50	predicted protein [Populus trichocarpa] >gi|222848670|gb|EEE86217.1| predicted protein [Populus trichocarpa]	gi|224078981|ref|XM_002305670.1|	654	0	Populus trichocarpa predicted protein, mRNA	--	--	--	--
CL10182.Contig1_All	1292	197	8.4991	210	9.3609	gi|224126053|ref|XP_002319744.1|	516.5	3e-145	predicted protein [Populus trichocarpa] >gi|222858120|gb|EEE95667.1| predicted protein [Populus trichocarpa]	gi|159459645|gb|AC214032.1|	1548	0	Populus trichocarpa clone POP043-I07, complete sequence	sp|Q9LYT3|TT12_ARATH	174	1e-43	Protein TRANSPARENT TESTA 12 OS=Arabidopsis thaliana GN=TT12 PE=2 SV=1
CL10182.Contig2_All	1015	98	5.3819	80	4.5392	gi|224126053|ref|XP_002319744.1|	556.2	3e-157	predicted protein [Populus trichocarpa] >gi|222858120|gb|EEE95667.1| predicted protein [Populus trichocarpa]	gi|159459645|gb|AC214032.1|	991	0	Populus trichocarpa clone POP043-I07, complete sequence	sp|Q9LYT3|TT12_ARATH	196	2e-50	Protein TRANSPARENT TESTA 12 OS=Arabidopsis thaliana GN=TT12 PE=2 SV=1
CL10183.Contig1_All	1859	194	5.8169	177	5.4834	gi|224088063|ref|XP_002308312.1|	997.3	0	cytochrome P450 [Populus trichocarpa] >gi|222854288|gb|EEE91835.1| cytochrome P450 [Populus trichocarpa]	gi|224088062|ref|XM_002308276.1|	2321	0	Populus trichocarpa cytochrome P450 (CYP734A9), mRNA	sp|O48786|C734A_ARATH	808	0	Cytochrome P450 734A1 OS=Arabidopsis thaliana GN=CYP734A1 PE=2 SV=1
CL10183.Contig2_All	707	18	1.4191	18	1.4663	gi|224088063|ref|XP_002308312.1|	406.4	2e-112	cytochrome P450 [Populus trichocarpa] >gi|222854288|gb|EEE91835.1| cytochrome P450 [Populus trichocarpa]	gi|224088062|ref|XM_002308276.1|	1142	0	Populus trichocarpa cytochrome P450 (CYP734A9), mRNA	sp|O48786|C734A_ARATH	304	3e-83	Cytochrome P450 734A1 OS=Arabidopsis thaliana GN=CYP734A1 PE=2 SV=1
CL10184.Contig1_All	235	10	2.3719	1	0.2451	gi|224142405|ref|XP_002324549.1|	167.5	5e-41	predicted protein [Populus trichocarpa] >gi|222865983|gb|EEF03114.1| predicted protein [Populus trichocarpa]	gi|162418031|gb|AC215840.1|	244	3e-62	Populus trichocarpa clone POP043-C12, complete sequence	--	--	--	--
CL10184.Contig2_All	463	42	5.0564	59	7.3389	gi|224142405|ref|XP_002324549.1|	207.6	5e-53	predicted protein [Populus trichocarpa] >gi|222865983|gb|EEF03114.1| predicted protein [Populus trichocarpa]	gi|162418031|gb|AC215840.1|	285	2e-74	Populus trichocarpa clone POP043-C12, complete sequence	--	--	--	--
CL10184.Contig3_All	453	49	6.0293	44	5.5939	gi|224091725|ref|XP_002309335.1|	204.1	5e-52	predicted protein [Populus trichocarpa] >gi|222855311|gb|EEE92858.1| predicted protein [Populus trichocarpa]	gi|162418031|gb|AC215840.1|	194	5e-47	Populus trichocarpa clone POP043-C12, complete sequence	--	--	--	--
CL10185.Contig1_All	2685	9643	200.189	8966	192.315	gi|224062651|ref|XP_002300867.1|	874.8	0	predicted protein [Populus trichocarpa] >gi|222842593|gb|EEE80140.1| predicted protein [Populus trichocarpa]	gi|160952662|emb|CU229652.1|	1235	0	Populus EST from mild drought-stressed leaves	sp|O23920|HPPD_DAUCA	657	0	4-hydroxyphenylpyruvate dioxygenase OS=Daucus carota PE=2 SV=1
CL10185.Contig2_All	259	41	8.8238	17	3.7801	gi|224062651|ref|XP_002300867.1|	146.7	1e-34	predicted protein [Populus trichocarpa] >gi|222842593|gb|EEE80140.1| predicted protein [Populus trichocarpa]	gi|160952662|emb|CU229652.1|	230	5e-58	Populus EST from mild drought-stressed leaves	sp|O23920|HPPD_DAUCA	120	2e-28	4-hydroxyphenylpyruvate dioxygenase OS=Daucus carota PE=2 SV=1
CL10186.Contig1_All	422	8	1.0567	12	1.6377	gi|224060365|ref|XP_002300163.1|	262.7	1e-69	predicted protein [Populus trichocarpa] >gi|222847421|gb|EEE84968.1| predicted protein [Populus trichocarpa]	gi|104294907|gb|AC184060.2|	569	1e-160	Populus trichocarpa clone Pop1-106E15, complete sequence	--	--	--	--
CL10186.Contig2_All	614	27	2.4511	22	2.0635	gi|224060365|ref|XP_002300163.1|	315.8	2e-85	predicted protein [Populus trichocarpa] >gi|222847421|gb|EEE84968.1| predicted protein [Populus trichocarpa]	gi|104294907|gb|AC184060.2|	864	0	Populus trichocarpa clone Pop1-106E15, complete sequence	--	--	--	--
CL10186.Contig3_All	489	7	0.7979	8	0.9422	gi|224060365|ref|XP_002300163.1|	283.5	9e-76	predicted protein [Populus trichocarpa] >gi|222847421|gb|EEE84968.1| predicted protein [Populus trichocarpa]	gi|104294907|gb|AC184060.2|	862	0	Populus trichocarpa clone Pop1-106E15, complete sequence	--	--	--	--
CL10187.Contig1_All	1122	227	11.2773	164	8.418	gi|224069150|ref|XP_002302912.1|	658.7	0	predicted protein [Populus trichocarpa] >gi|222844638|gb|EEE82185.1| predicted protein [Populus trichocarpa]	gi|159884259|gb|AC214214.1|	2036	0	Populus trichocarpa clone POP028-A01, complete sequence	sp|Q93WJ9|KAN1_ARATH	175	5e-44	Transcription repressor KAN1 OS=Arabidopsis thaliana GN=KAN1 PE=1 SV=1
CL10188.Contig1_All	860	93	6.0278	79	5.2904	gi|224114263|ref|XP_002316711.1|	517.7	9e-146	predicted protein [Populus trichocarpa] >gi|222859776|gb|EEE97323.1| predicted protein [Populus trichocarpa]	gi|470114766|ref|XM_004293533.1|	149	6e-33	PREDICTED: Fragaria vesca subsp. vesca uncharacterized LOC101306306 (LOC101306306), mRNA	--	--	--	--
CL10188.Contig2_All	729	21	1.6057	15	1.185	gi|224114263|ref|XP_002316711.1|	308.5	6e-83	predicted protein [Populus trichocarpa] >gi|222859776|gb|EEE97323.1| predicted protein [Populus trichocarpa]	gi|470114766|ref|XM_004293533.1|	139	5e-30	PREDICTED: Fragaria vesca subsp. vesca uncharacterized LOC101306306 (LOC101306306), mRNA	--	--	--	--
CL10189.Contig1_All	388	56	8.045	42	6.2341	gi|224134244|ref|XP_002327791.1|	181.8	2e-45	predicted protein [Populus trichocarpa] >gi|222836876|gb|EEE75269.1| predicted protein [Populus trichocarpa]	gi|224094830|ref|XM_002310220.1|	345	2e-92	Populus trichocarpa predicted protein, mRNA	--	--	--	--
CL10189.Contig2_All	460	110	13.3293	80	10.0159	gi|224134244|ref|XP_002327791.1|	238.8	2e-62	predicted protein [Populus trichocarpa] >gi|222836876|gb|EEE75269.1| predicted protein [Populus trichocarpa]	gi|449521450|ref|XM_004167695.1|	75.8	4e-11	PREDICTED: Cucumis sativus uncharacterized LOC101222171 (LOC101222171), mRNA	--	--	--	--
CL1019.Contig1_All	825	18	1.2162	11	0.7679	gi|224064306|ref|XP_002301419.1|	143.3	4e-33	predicted protein [Populus trichocarpa] >gi|222843145|gb|EEE80692.1| predicted protein [Populus trichocarpa]	gi|224064305|ref|XM_002301383.1|	389	1e-105	Populus trichocarpa predicted protein, mRNA	--	--	--	--
CL1019.Contig2_All	684	117	9.5346	127	10.6932	gi|224064306|ref|XP_002301419.1|	136.7	3e-31	predicted protein [Populus trichocarpa] >gi|222843145|gb|EEE80692.1| predicted protein [Populus trichocarpa]	gi|224064305|ref|XM_002301383.1|	373	1e-100	Populus trichocarpa predicted protein, mRNA	--	--	--	--
CL1019.Contig3_All	2981	515	9.6298	470	9.0802	gi|224111290|ref|XP_002315805.1|	332	3e-89	predicted protein [Populus trichocarpa] >gi|222864845|gb|EEF01976.1| predicted protein [Populus trichocarpa]	gi|335324892|gb|GU284650.1|	706	0	Populus balsamifera isolate STO11 haplotype A potassium transporter family protein gene, partial sequence	sp|Q6H4R6|HAK23_ORYSJ	1027	0	Potassium transporter 23 OS=Oryza sativa subsp. japonica GN=HAK23 PE=2 SV=1
CL1019.Contig4_All	1418	95	3.7344	76	3.0867	gi|224064306|ref|XP_002301419.1|	142.1	2e-32	predicted protein [Populus trichocarpa] >gi|222843145|gb|EEE80692.1| predicted protein [Populus trichocarpa]	gi|123699834|emb|AM431927.1|	99.6	8e-18	Vitis vinifera contig VV78X003403.6, whole genome shotgun sequence	sp|Q6H4R6|HAK23_ORYSJ	64.7	1e-10	Potassium transporter 23 OS=Oryza sativa subsp. japonica GN=HAK23 PE=2 SV=1
CL1019.Contig5_All	3016	140	2.5874	127	2.4251	gi|224111290|ref|XP_002315805.1|	1585.8	0	predicted protein [Populus trichocarpa] >gi|222864845|gb|EEF01976.1| predicted protein [Populus trichocarpa]	gi|335324892|gb|GU284650.1|	698	0	Populus balsamifera isolate STO11 haplotype A potassium transporter family protein gene, partial sequence	sp|Q6H4R6|HAK23_ORYSJ	1206	0	Potassium transporter 23 OS=Oryza sativa subsp. japonica GN=HAK23 PE=2 SV=1
CL1019.Contig6_All	3142	27	0.479	11	0.2016	gi|224111290|ref|XP_002315805.1|	1585.8	0	predicted protein [Populus trichocarpa] >gi|222864845|gb|EEF01976.1| predicted protein [Populus trichocarpa]	gi|335324892|gb|GU284650.1|	698	0	Populus balsamifera isolate STO11 haplotype A potassium transporter family protein gene, partial sequence	sp|Q6H4R6|HAK23_ORYSJ	1206	0	Potassium transporter 23 OS=Oryza sativa subsp. japonica GN=HAK23 PE=2 SV=1
CL1019.Contig7_All	3003	28	0.5197	11	0.211	gi|224111290|ref|XP_002315805.1|	1585.8	0	predicted protein [Populus trichocarpa] >gi|222864845|gb|EEF01976.1| predicted protein [Populus trichocarpa]	gi|335324892|gb|GU284650.1|	698	0	Populus balsamifera isolate STO11 haplotype A potassium transporter family protein gene, partial sequence	sp|Q6H4R6|HAK23_ORYSJ	1206	0	Potassium transporter 23 OS=Oryza sativa subsp. japonica GN=HAK23 PE=2 SV=1
CL1019.Contig8_All	3129	26	0.4632	11	0.2025	gi|224111290|ref|XP_002315805.1|	1585.8	0	predicted protein [Populus trichocarpa] >gi|222864845|gb|EEF01976.1| predicted protein [Populus trichocarpa]	gi|335324892|gb|GU284650.1|	698	0	Populus balsamifera isolate STO11 haplotype A potassium transporter family protein gene, partial sequence	sp|Q6H4R6|HAK23_ORYSJ	1206	0	Potassium transporter 23 OS=Oryza sativa subsp. japonica GN=HAK23 PE=2 SV=1
CL10190.Contig1_All	673	1523	126.141	2113	180.819	gi|148728342|gb|ABR08655.1|	235.3	6e-61	lipid transfer protein [Populus alba x Populus glandulosa]	gi|148728341|gb|EF613275.1|	965	0	Populus alba x Populus tremula var. glandulosa lipid transfer protein (LTP1) mRNA, complete cds	sp|Q9M5X8|NLTP_PRUAV	146	9e-36	Non-specific lipid-transfer protein OS=Prunus avium PE=1 SV=1
CL10191.Contig1_All	317	92	16.1771	71	12.8991	gi|118481297|gb|ABK92592.1|	115.2	3e-25	unknown [Populus trichocarpa]	gi|118481296|gb|EF144348.1|	396	1e-108	Populus trichocarpa clone PX0015_O11 unknown mRNA	--	--	--	--
CL10191.Contig2_All	958	188	10.9387	137	8.236	gi|118481297|gb|ABK92592.1|	440.3	2e-122	unknown [Populus trichocarpa]	gi|225446214|ref|XM_002264004.1|	87.7	2e-14	PREDICTED: Vitis vinifera uncharacterized LOC100267845 (LOC100267845), mRNA	--	--	--	--
CL10192.Contig1_All	2675	1111	23.1506	982	21.142	gi|224132582|ref|XP_002327831.1|	1614	0	SET domain protein [Populus trichocarpa] >gi|222837240|gb|EEE75619.1| SET domain protein [Populus trichocarpa]	gi|155369353|gb|AC208095.1|	3812	0	Populus trichocarpa clone JGIACSB09-L15, complete sequence	sp|O23372|ATXR3_ARATH	441	8e-124	Probable histone-lysine N-methyltransferase ATXR3 OS=Arabidopsis thaliana GN=ATXR3 PE=1 SV=2
CL10192.Contig2_All	2493	904	20.2124	807	18.6428	gi|224095776|ref|XP_002310475.1|	1586.2	0	SET domain protein [Populus trichocarpa] >gi|222853378|gb|EEE90925.1| SET domain protein [Populus trichocarpa]	gi|224095775|ref|XM_002310439.1|	4216	0	Populus trichocarpa SET domain protein (SDG904), mRNA	sp|O23372|ATXR3_ARATH	444	9e-125	Probable histone-lysine N-methyltransferase ATXR3 OS=Arabidopsis thaliana GN=ATXR3 PE=1 SV=2
CL10193.Contig1_All	792	97	6.8268	67	4.872	gi|224125768|ref|XP_002319670.1|	485.7	3e-136	predicted protein [Populus trichocarpa] >gi|222858046|gb|EEE95593.1| predicted protein [Populus trichocarpa]	gi|359476526|ref|XM_002267396.2|	276	3e-71	PREDICTED: Vitis vinifera uncharacterized LOC100253635, transcript variant 1 (LOC100253635), mRNA	--	--	--	--
CL10193.Contig2_All	312	8	1.4292	12	2.2151	gi|224125768|ref|XP_002319670.1|	160.2	8e-39	predicted protein [Populus trichocarpa] >gi|222858046|gb|EEE95593.1| predicted protein [Populus trichocarpa]	gi|359476526|ref|XM_002267396.2|	155	3e-35	PREDICTED: Vitis vinifera uncharacterized LOC100253635, transcript variant 1 (LOC100253635), mRNA	--	--	--	--
CL10194.Contig1_All	1315	188	7.969	209	9.1533	gi|224075453|ref|XP_002304640.1|	439.9	4e-122	AP2/ERF domain-containing transcription factor [Populus trichocarpa] >gi|222842072|gb|EEE79619.1| AP2/ERF domain-containing transcription factor [Populus trichocarpa]	gi|224075452|ref|XM_002304604.1|	1090	0	Populus trichocarpa AP2/ERF domain-containing transcription factor (ERF71), mRNA	sp|Q9LYU3|EF113_ARATH	192	4e-49	Ethylene-responsive transcription factor ERF113 OS=Arabidopsis thaliana GN=ERF113 PE=2 SV=1
CL10194.Contig2_All	1395	140	5.594	156	6.4404	gi|224075453|ref|XP_002304640.1|	453.8	3e-126	AP2/ERF domain-containing transcription factor [Populus trichocarpa] >gi|222842072|gb|EEE79619.1| AP2/ERF domain-containing transcription factor [Populus trichocarpa]	gi|224075452|ref|XM_002304604.1|	1227	0	Populus trichocarpa AP2/ERF domain-containing transcription factor (ERF71), mRNA	sp|Q9LYU3|EF113_ARATH	197	9e-51	Ethylene-responsive transcription factor ERF113 OS=Arabidopsis thaliana GN=ERF113 PE=2 SV=1
CL10194.Contig3_All	1286	360	15.6039	382	17.1073	gi|224053569|ref|XP_002297877.1|	439.9	4e-122	AP2/ERF domain-containing transcription factor [Populus trichocarpa] >gi|222845135|gb|EEE82682.1| AP2/ERF domain-containing transcription factor [Populus trichocarpa]	gi|224053568|ref|XM_002297841.1|	1096	0	Populus trichocarpa AP2/ERF domain-containing transcription factor (ERF70), mRNA	sp|Q9LYU3|EF113_ARATH	184	1e-46	Ethylene-responsive transcription factor ERF113 OS=Arabidopsis thaliana GN=ERF113 PE=2 SV=1
CL10195.Contig1_All	2582	1422	30.6983	1381	30.8033	gi|224102457|ref|XP_002312685.1|	1223.4	0	predicted protein [Populus trichocarpa] >gi|222852505|gb|EEE90052.1| predicted protein [Populus trichocarpa]	gi|225425598|ref|XM_002263102.1|	1183	0	PREDICTED: Vitis vinifera protein NSP-INTERACTING KINASE 3-like (LOC100256748), mRNA	sp|Q93ZS4|NIK3_ARATH	960	0	Protein NSP-INTERACTING KINASE 3 OS=Arabidopsis thaliana GN=NIK3 PE=1 SV=1
CL10196.Contig1_All	565	34	3.3543	30	3.058	gi|224137840|ref|XP_002326453.1|	85.5	5e-16	predicted protein [Populus trichocarpa] >gi|222833775|gb|EEE72252.1| predicted protein [Populus trichocarpa]	gi|224137839|ref|XM_002326417.1|	242	3e-61	Populus trichocarpa predicted protein, mRNA	--	--	--	--
CL10196.Contig2_All	560	70	6.9676	54	5.5535	gi|224145396|ref|XP_002325627.1|	110.9	1e-23	predicted protein [Populus trichocarpa] >gi|222862502|gb|EEF00009.1| predicted protein [Populus trichocarpa]	gi|224145395|ref|XM_002325591.1|	299	2e-78	Populus trichocarpa predicted protein, mRNA	--	--	--	--
CL10197.Contig1_All	537	47	4.8786	63	6.7566	gi|224140014|ref|XP_002323382.1|	358.6	2e-98	predicted protein [Populus trichocarpa] >gi|222868012|gb|EEF05143.1| predicted protein [Populus trichocarpa]	gi|332640072|gb|CP002686.1|	71.9	7e-10	Arabidopsis thaliana chromosome 3, complete sequence	sp|Q84TG3|PUB23_ARATH	218	2e-57	E3 ubiquitin-protein ligase PUB23 OS=Arabidopsis thaliana GN=PUB23 PE=1 SV=1
CL10198.Contig1_All	436	7	0.8949	5	0.6605	gi|224135473|ref|XP_002322082.1|	283.1	9e-76	predicted protein [Populus trichocarpa] >gi|222869078|gb|EEF06209.1| predicted protein [Populus trichocarpa]	gi|164498903|gb|AC216414.1|	103	1e-19	Populus trichocarpa clone POP040-A04, complete sequence	sp|Q9FKD0|MT797_ARATH	130	4e-31	Probable S-adenosylmethionine-dependent methyltransferase At5g37970 OS=Arabidopsis thaliana GN=At5g37970 PE=1 SV=1
CL10198.Contig2_All	758	101	7.4272	104	7.9018	gi|224135473|ref|XP_002322082.1|	347.8	1e-94	predicted protein [Populus trichocarpa] >gi|222869078|gb|EEF06209.1| predicted protein [Populus trichocarpa]	gi|164498903|gb|AC216414.1|	125	7e-26	Populus trichocarpa clone POP040-A04, complete sequence	sp|Q9FKD0|MT797_ARATH	157	8e-39	Probable S-adenosylmethionine-dependent methyltransferase At5g37970 OS=Arabidopsis thaliana GN=At5g37970 PE=1 SV=1
CL10199.Contig1_All	501	61	6.7868	50	5.7477	gi|302850989|ref|XP_002957020.1|	213	1e-54	component of cytosolic 80S ribosome and 60S large subunit [Volvox carteri f. nagariensis] >gi|300257738|gb|EFJ41983.1| component of cytosolic 80S ribosome and 60S large subunit [Volvox carteri f. nagariensis]	gi|159491448|ref|XM_001703627.1|	319	2e-84	Chlamydomonas reinhardtii ribosomal protein L22, component of cytosolic 80S ribosome and 60S large subunit (RPL22) mRNA, complete cds	sp|Q9M9W1|RL222_ARATH	177	2e-45	60S ribosomal protein L22-2 OS=Arabidopsis thaliana GN=RPL22B PE=2 SV=1
CL10199.Contig2_All	454	48	5.8933	46	5.8353	gi|302850989|ref|XP_002957020.1|	213	1e-54	component of cytosolic 80S ribosome and 60S large subunit [Volvox carteri f. nagariensis] >gi|300257738|gb|EFJ41983.1| component of cytosolic 80S ribosome and 60S large subunit [Volvox carteri f. nagariensis]	gi|159491448|ref|XM_001703627.1|	323	9e-86	Chlamydomonas reinhardtii ribosomal protein L22, component of cytosolic 80S ribosome and 60S large subunit (RPL22) mRNA, complete cds	sp|Q9M9W1|RL222_ARATH	177	2e-45	60S ribosomal protein L22-2 OS=Arabidopsis thaliana GN=RPL22B PE=2 SV=1
CL102.Contig1_All	427	7	0.9138	8	1.079	gi|357117227|ref|XP_003560374.1|	55.5	3e-07	PREDICTED: pleiotropic drug resistance protein 13-like [Brachypodium distachyon]	gi|159479623|ref|XM_001697838.1|	71.9	5e-10	Chlamydomonas reinhardtii strain CC-503 cw92 mt+	sp|Q8S628|PDR13_ORYSJ	155	1e-38	Pleiotropic drug resistance protein 13 OS=Oryza sativa subsp. japonica GN=PDR13 PE=3 SV=1
CL102.Contig2_All	394	1	0.1415	6	0.877	gi|357117227|ref|XP_003560374.1|	168.3	3e-41	PREDICTED: pleiotropic drug resistance protein 13-like [Brachypodium distachyon]	gi|159479623|ref|XM_001697838.1|	119	2e-24	Chlamydomonas reinhardtii strain CC-503 cw92 mt+	sp|Q9XIE2|AB36G_ARATH	163	2e-41	ABC transporter G family member 36 OS=Arabidopsis thaliana GN=ABCG36 PE=1 SV=1
CL1020.Contig1_All	629	20	1.7724	32	2.9299	gi|224132618|ref|XP_002327840.1|	345.1	4e-94	predicted protein [Populus trichocarpa] >gi|222837249|gb|EEE75628.1| predicted protein [Populus trichocarpa]	gi|225442238|ref|XM_002274905.1|	174	7e-41	PREDICTED: Vitis vinifera puromycin-sensitive aminopeptidase-like (LOC100244572), mRNA	--	--	--	--
CL1020.Contig2_All	1507	337	12.4649	299	11.4266	gi|224132618|ref|XP_002327840.1|	937.9	0	predicted protein [Populus trichocarpa] >gi|222837249|gb|EEE75628.1| predicted protein [Populus trichocarpa]	gi|225442238|ref|XM_002274905.1|	452	1e-124	PREDICTED: Vitis vinifera puromycin-sensitive aminopeptidase-like (LOC100244572), mRNA	--	--	--	--
CL10200.Contig1_All	840	137	9.091	121	8.2959	gi|255546033|ref|XP_002514076.1|	344.4	1e-93	DNA binding protein, putative [Ricinus communis] >gi|223546532|gb|EEF48030.1| DNA binding protein, putative [Ricinus communis]	gi|349713401|emb|FQ391569.1|	478	1e-132	Vitis vinifera clone SS0AP1YG02	sp|O81488|ALFL4_ARATH	292	1e-79	PHD finger protein ALFIN-LIKE 4 OS=Arabidopsis thaliana GN=AL4 PE=1 SV=2
CL10200.Contig2_All	717	58	4.509	43	3.4539	gi|224087957|ref|XP_002308272.1|	268.1	9e-71	predicted protein [Populus trichocarpa] >gi|222854248|gb|EEE91795.1| predicted protein [Populus trichocarpa]	gi|349713401|emb|FQ391569.1|	375	1e-101	Vitis vinifera clone SS0AP1YG02	sp|O81488|ALFL4_ARATH	219	2e-57	PHD finger protein ALFIN-LIKE 4 OS=Arabidopsis thaliana GN=AL4 PE=1 SV=2
CL10201.Contig1_All	248	0	0	0	0	--	--	--	--	--	--	--	--	--	--	--	--
CL10201.Contig2_All	353	31	4.8951	4	0.6526	--	--	--	--	gi|159468022|ref|XM_001692130.1|	79.8	2e-12	Chlamydomonas reinhardtii strain CC-503 cw92 mt+	--	--	--	--
CL10202.Contig1_All	639	578	50.4195	406	36.5918	gi|224085591|ref|XP_002335271.1|	216.9	2e-55	predicted protein [Populus trichocarpa] >gi|224131636|ref|XP_002328071.1| predicted protein [Populus trichocarpa] >gi|222833185|gb|EEE71662.1| predicted protein [Populus trichocarpa] >gi|222837586|gb|EEE75951.1| predicted protein [Populus trichocarpa]	gi|407260784|gb|JX431923.1|	533	1e-149	Populus tomentosa stress responsive A/B barrel domain family protein (Dabb) mRNA, complete cds	sp|Q9FK81|Y5258_ARATH	134	4e-32	Uncharacterized protein At5g22580 OS=Arabidopsis thaliana GN=At5g22580 PE=1 SV=1
CL10202.Contig2_All	618	381	34.3643	329	30.6596	gi|407260761|gb|AFT91999.1|	218.4	6e-56	stress responsive A/B barrel domain family protein [Populus tomentosa] >gi|407260785|gb|AFT92011.1| stress responsive A/B barrel domain family protein [Populus tomentosa]	gi|407260786|gb|JX431924.1|	892	0	Populus alba x Populus tremula var. glandulosa stress responsive A/B barrel domain family protein (Dabb) mRNA, complete cds	sp|Q9FK81|Y5258_ARATH	135	2e-32	Uncharacterized protein At5g22580 OS=Arabidopsis thaliana GN=At5g22580 PE=1 SV=1
CL10203.Contig1_All	328	68	11.556	113	19.841	--	--	--	--	gi|470119371|ref|XM_004295740.1|	97.6	7e-18	PREDICTED: Fragaria vesca subsp. vesca uncharacterized LOC101312619 (LOC101312619), mRNA	--	--	--	--
CL10204.Contig1_All	510	125	13.6619	150	16.9387	gi|224071415|ref|XP_002303449.1|	231.1	6e-60	predicted protein [Populus trichocarpa] >gi|222840881|gb|EEE78428.1| predicted protein [Populus trichocarpa]	gi|57900224|dbj|AP006530.3|	61.9	6e-07	Oryza sativa Japonica Group genomic DNA, chromosome 1, BAC clone:B1329D01	--	--	--	--
CL10205.Contig1_All	1410	244	9.6459	373	15.2352	gi|224137920|ref|XP_002326473.1|	439.5	6e-122	predicted protein [Populus trichocarpa] >gi|118483873|gb|ABK93827.1| unknown [Populus trichocarpa] >gi|222833795|gb|EEE72272.1| predicted protein [Populus trichocarpa]	gi|160957443|emb|CU226605.1|	1134	0	Populus EST from severe drought-stressed leaves	sp|P82413|RK19_SPIOL	270	2e-72	50S ribosomal protein L19, chloroplastic OS=Spinacia oleracea GN=RPL19 PE=1 SV=2
CL10205.Contig2_All	1263	135	5.958	169	7.7062	gi|224137920|ref|XP_002326473.1|	439.5	5e-122	predicted protein [Populus trichocarpa] >gi|118483873|gb|ABK93827.1| unknown [Populus trichocarpa] >gi|222833795|gb|EEE72272.1| predicted protein [Populus trichocarpa]	gi|160957443|emb|CU226605.1|	1134	0	Populus EST from severe drought-stressed leaves	sp|P82413|RK19_SPIOL	270	2e-72	50S ribosomal protein L19, chloroplastic OS=Spinacia oleracea GN=RPL19 PE=1 SV=2
CL10206.Contig1_All	745	29	2.1698	38	2.9376	gi|224083856|ref|XP_002307146.1|	258.5	8e-68	predicted protein [Populus trichocarpa] >gi|222856595|gb|EEE94142.1| predicted protein [Populus trichocarpa]	gi|359484120|ref|XM_002267249.2|	234	1e-58	PREDICTED: Vitis vinifera calumenin-like (LOC100262960), mRNA	--	--	--	--
CL10206.Contig2_All	603	101	9.3363	97	9.2643	gi|224083856|ref|XP_002307146.1|	253.8	1e-66	predicted protein [Populus trichocarpa] >gi|222856595|gb|EEE94142.1| predicted protein [Populus trichocarpa]	gi|168176840|gb|AC217584.1|	246	2e-62	Populus trichocarpa clone POP021-G16, complete sequence	--	--	--	--
CL10206.Contig3_All	743	15	1.1253	32	2.4804	gi|224083856|ref|XP_002307146.1|	266.9	2e-70	predicted protein [Populus trichocarpa] >gi|222856595|gb|EEE94142.1| predicted protein [Populus trichocarpa]	gi|359484120|ref|XM_002267249.2|	238	7e-60	PREDICTED: Vitis vinifera calumenin-like (LOC100262960), mRNA	sp|P04352|CALM_CHLRE	47.8	7e-06	Calmodulin OS=Chlamydomonas reinhardtii PE=1 SV=2
CL10207.Contig1_All	558	57	5.6939	40	4.1284	gi|224132836|ref|XP_002327892.1|	327	1e-88	predicted protein [Populus trichocarpa] >gi|222837301|gb|EEE75680.1| predicted protein [Populus trichocarpa]	gi|161169056|gb|AC214857.1|	228	5e-57	Populus trichocarpa clone ACSB1477-G22, complete sequence	sp|O22864|NLP8_ARATH	221	2e-58	Protein NLP8 OS=Arabidopsis thaliana GN=NLP8 PE=2 SV=1
CL10207.Contig2_All	273	17	3.471	9	1.8986	gi|224095638|ref|XP_002310422.1|	181.8	2e-45	predicted protein [Populus trichocarpa] >gi|222853325|gb|EEE90872.1| predicted protein [Populus trichocarpa]	gi|161169056|gb|AC214857.1|	93.7	9e-17	Populus trichocarpa clone ACSB1477-G22, complete sequence	sp|Q0JC27|NLP2_ORYSJ	123	2e-29	Protein NLP2 OS=Oryza sativa subsp. japonica GN=NLP2 PE=2 SV=2
CL10208.Contig1_All	1629	1622	55.5011	1667	58.9351	gi|94503774|gb|ABF29696.1|	800	0	abscisic acid responsive element-binding protein 2 [Populus suaveolens]	gi|94503773|gb|DQ487100.1|	2426	0	Populus suaveolens abscisic acid responsive element-binding protein 2 (ABF2) mRNA, complete cds	sp|Q9M7Q4|AI5L5_ARATH	407	1e-113	ABSCISIC ACID-INSENSITIVE 5-like protein 5 OS=Arabidopsis thaliana GN=ABF2 PE=1 SV=1
CL10209.Contig1_All	273	40	8.1671	34	7.1726	gi|224138622|ref|XP_002322860.1|	74.7	4e-13	predicted protein [Populus trichocarpa] >gi|222867490|gb|EEF04621.1| predicted protein [Populus trichocarpa]	gi|224138621|ref|XM_002322824.1|	216	9e-54	Populus trichocarpa predicted protein, mRNA	--	--	--	--
CL1021.Contig1_All	932	46	2.7511	63	3.893	gi|224063319|ref|XP_002301094.1|	500.4	1e-140	predicted protein [Populus trichocarpa] >gi|222842820|gb|EEE80367.1| predicted protein [Populus trichocarpa]	gi|159647943|gb|AC214096.1|	456	1e-125	Populus trichocarpa clone POP019-C06, complete sequence	sp|Q8L7S0|ULP2B_ARATH	374	6e-104	Probable ubiquitin-like-specific protease 2B OS=Arabidopsis thaliana GN=ULP2B PE=2 SV=3
CL1021.Contig2_All	2395	241	5.609	130	3.1261	gi|224063319|ref|XP_002301094.1|	1442.2	0	predicted protein [Populus trichocarpa] >gi|222842820|gb|EEE80367.1| predicted protein [Populus trichocarpa]	gi|159647943|gb|AC214096.1|	504	1e-139	Populus trichocarpa clone POP019-C06, complete sequence	sp|Q8L7S0|ULP2B_ARATH	636	0	Probable ubiquitin-like-specific protease 2B OS=Arabidopsis thaliana GN=ULP2B PE=2 SV=3
CL1021.Contig3_All	1930	323	9.3286	286	8.5343	gi|224063319|ref|XP_002301094.1|	1142.1	0	predicted protein [Populus trichocarpa] >gi|222842820|gb|EEE80367.1| predicted protein [Populus trichocarpa]	gi|159647943|gb|AC214096.1|	809	0	Populus trichocarpa clone POP019-C06, complete sequence	sp|Q8L7S0|ULP2B_ARATH	575	4e-164	Probable ubiquitin-like-specific protease 2B OS=Arabidopsis thaliana GN=ULP2B PE=2 SV=3
CL1021.Contig4_All	246	38	8.6103	24	5.6187	gi|224141155|ref|XP_002323940.1|	167.2	7e-41	predicted protein [Populus trichocarpa] >gi|222866942|gb|EEF04073.1| predicted protein [Populus trichocarpa]	gi|470112508|ref|XM_004292428.1|	125	2e-26	PREDICTED: Fragaria vesca subsp. vesca probable ubiquitin-like-specific protease 2B-like (LOC101296177), mRNA	sp|Q8L7S0|ULP2B_ARATH	137	1e-33	Probable ubiquitin-like-specific protease 2B OS=Arabidopsis thaliana GN=ULP2B PE=2 SV=3
CL1021.Contig5_All	836	10	0.6668	9	0.62	gi|224063319|ref|XP_002301094.1|	527.7	8e-149	predicted protein [Populus trichocarpa] >gi|222842820|gb|EEE80367.1| predicted protein [Populus trichocarpa]	gi|159647943|gb|AC214096.1|	504	1e-140	Populus trichocarpa clone POP019-C06, complete sequence	sp|Q8L7S0|ULP2B_ARATH	251	3e-67	Probable ubiquitin-like-specific protease 2B OS=Arabidopsis thaliana GN=ULP2B PE=2 SV=3
CL10210.Contig1_All	1318	1538	65.0448	1310	57.242	gi|224063209|ref|XP_002301042.1|	560.1	3e-158	AP2/ERF domain-containing transcription factor [Populus trichocarpa] >gi|222842768|gb|EEE80315.1| AP2/ERF domain-containing transcription factor [Populus trichocarpa]	gi|224084691|ref|XM_002307354.1|	1388	0	Populus trichocarpa AP2/ERF domain-containing transcription factor (DREB21), mRNA	sp|Q8H1E4|RAP24_ARATH	281	5e-76	Ethylene-responsive transcription factor RAP2-4 OS=Arabidopsis thaliana GN=RAP2-4 PE=1 SV=1
CL10210.Contig2_All	530	1246	131.043	982	106.707	gi|224063209|ref|XP_002301042.1|	349.7	1e-95	AP2/ERF domain-containing transcription factor [Populus trichocarpa] >gi|222842768|gb|EEE80315.1| AP2/ERF domain-containing transcription factor [Populus trichocarpa]	gi|224063208|ref|XM_002301006.1|	858	0	Populus trichocarpa AP2/ERF domain-containing transcription factor (DREB19), mRNA	sp|Q8H1E4|RAP24_ARATH	134	4e-32	Ethylene-responsive transcription factor RAP2-4 OS=Arabidopsis thaliana GN=RAP2-4 PE=1 SV=1
CL10211.Contig1_All	375	13	1.9323	4	0.6143	--	--	--	--	--	--	--	--	--	--	--	--
CL10211.Contig2_All	534	26	2.714	17	1.8334	--	--	--	--	--	--	--	--	--	--	--	--
CL10211.Contig3_All	2246	192	4.765	141	3.6155	gi|224097311|ref|XP_002310903.1|	762.7	0	predicted protein [Populus trichocarpa] >gi|222853806|gb|EEE91353.1| predicted protein [Populus trichocarpa]	gi|359483277|ref|XM_002269777.2|	301	2e-78	PREDICTED: Vitis vinifera uncharacterized LOC100244458 (LOC100244458), mRNA	sp|Q8GUN5|PHL1_ARATH	177	2e-44	Protein PHR1-LIKE 1 OS=Arabidopsis thaliana GN=PHL1 PE=1 SV=1
CL10211.Contig4_All	2423	31	0.7131	40	0.9507	gi|224097311|ref|XP_002310903.1|	370.9	5e-101	predicted protein [Populus trichocarpa] >gi|222853806|gb|EEE91353.1| predicted protein [Populus trichocarpa]	gi|359483277|ref|XM_002269777.2|	214	3e-52	PREDICTED: Vitis vinifera uncharacterized LOC100244458 (LOC100244458), mRNA	sp|Q8GUN5|PHL1_ARATH	129	6e-30	Protein PHR1-LIKE 1 OS=Arabidopsis thaliana GN=PHL1 PE=1 SV=1
CL10212.Contig1_All	2575	49	1.0607	44	0.9841	gi|255572872|ref|XP_002527368.1|	1185.2	0	SAB, putative [Ricinus communis] >gi|223533287|gb|EEF35040.1| SAB, putative [Ricinus communis]	gi|359492961|ref|XM_003634441.1|	884	0	PREDICTED: Vitis vinifera uncharacterized LOC100254031, transcript variant 2 (LOC100254031), mRNA	--	--	--	--
CL10212.Contig2_All	2479	70	1.574	52	1.2081	gi|255572872|ref|XP_002527368.1|	1185.2	0	SAB, putative [Ricinus communis] >gi|223533287|gb|EEF35040.1| SAB, putative [Ricinus communis]	gi|359492961|ref|XM_003634441.1|	884	0	PREDICTED: Vitis vinifera uncharacterized LOC100254031, transcript variant 2 (LOC100254031), mRNA	--	--	--	--
CL10213.Contig1_All	782	50	3.564	86	6.3336	gi|224081907|ref|XP_002306523.1|	209.5	4e-53	predicted protein [Populus trichocarpa] >gi|222855972|gb|EEE93519.1| predicted protein [Populus trichocarpa]	gi|160958427|emb|CU227101.1|	973	0	Populus EST from severe drought-stressed leaves	sp|Q39236|T2AG_ARATH	193	1e-49	Transcription initiation factor IIA subunit 2 OS=Arabidopsis thaliana GN=TFIIA-S PE=2 SV=2
CL10213.Contig2_All	858	31	2.0139	27	1.8123	gi|224081907|ref|XP_002306523.1|	209.5	5e-53	predicted protein [Populus trichocarpa] >gi|222855972|gb|EEE93519.1| predicted protein [Populus trichocarpa]	gi|160958427|emb|CU227101.1|	878	0	Populus EST from severe drought-stressed leaves	sp|Q39236|T2AG_ARATH	193	1e-49	Transcription initiation factor IIA subunit 2 OS=Arabidopsis thaliana GN=TFIIA-S PE=2 SV=2
CL10214.Contig1_All	1252	257	11.442	223	10.2579	gi|224102375|ref|XP_002312655.1|	796.2	0	predicted protein [Populus trichocarpa] >gi|222852475|gb|EEE90022.1| predicted protein [Populus trichocarpa]	gi|158854076|gb|AC213496.1|	797	0	Populus trichocarpa clone POP080-H20, complete sequence	--	--	--	--
CL10215.Contig1_All	1472	197	7.4598	161	6.2991	gi|224121414|ref|XP_002318576.1|	629	6e-179	predicted protein [Populus trichocarpa] >gi|222859249|gb|EEE96796.1| predicted protein [Populus trichocarpa]	gi|225456537|ref|XM_002264929.1|	470	1e-129	PREDICTED: Vitis vinifera ADP,ATP carrier protein ER-ANT1-like (LOC100263960), mRNA	sp|Q8LB08|ADT4_ARATH	506	1e-143	ADP,ATP carrier protein ER-ANT1 OS=Arabidopsis thaliana GN=ER-ANT1 PE=2 SV=2
CL10215.Contig2_All	801	74	5.1496	29	2.0851	gi|224121414|ref|XP_002318576.1|	177.2	2e-43	predicted protein [Populus trichocarpa] >gi|222859249|gb|EEE96796.1| predicted protein [Populus trichocarpa]	gi|123705929|emb|AM474873.1|	178	6e-42	Vitis vinifera contig VV78X191154.8, whole genome shotgun sequence	sp|Q8LB08|ADT4_ARATH	158	4e-39	ADP,ATP carrier protein ER-ANT1 OS=Arabidopsis thaliana GN=ER-ANT1 PE=2 SV=2
CL10216.Contig1_All	1655	684	23.0372	655	22.7931	gi|224110050|ref|XP_002315397.1|	574.3	2e-162	predicted protein [Populus trichocarpa] >gi|222864437|gb|EEF01568.1| predicted protein [Populus trichocarpa]	gi|157311799|gb|AC210341.1|	2115	0	Populus trichocarpa clone POP085-M05, complete sequence	--	--	--	--
CL10216.Contig2_All	202	14	3.8632	7	1.9957	gi|449530227|ref|XP_004172097.1|	69.7	1e-11	PREDICTED: LOW QUALITY PROTEIN: uncharacterized LOC101214156 [Cucumis sativus]	gi|157311799|gb|AC210341.1|	95.6	2e-17	Populus trichocarpa clone POP085-M05, complete sequence	--	--	--	--
CL10217.Contig1_All	397	69	9.6879	37	5.3675	gi|224137992|ref|XP_002326491.1|	93.6	1e-18	predicted protein [Populus trichocarpa] >gi|222833813|gb|EEE72290.1| predicted protein [Populus trichocarpa]	gi|224173052|ref|XM_002339681.1|	161	7e-37	Populus trichocarpa predicted protein, mRNA	--	--	--	--
CL10217.Contig2_All	304	12	2.2003	11	2.0839	--	--	--	--	--	--	--	--	--	--	--	--
CL10218.Contig1_All	1304	111	4.7448	94	4.1515	gi|224088577|ref|XP_002308481.1|	846.7	0	predicted protein [Populus trichocarpa] >gi|222854457|gb|EEE92004.1| predicted protein [Populus trichocarpa]	gi|166006853|gb|AC216765.1|	2327	0	Populus trichocarpa clone POP021-F16, complete sequence	--	--	--	--
CL10219.Contig1_All	627	415	36.8937	11	1.0104	--	--	--	--	--	--	--	--	--	--	--	--
CL10219.Contig2_All	339	22	3.6174	44	7.475	--	--	--	--	--	--	--	--	--	--	--	--
CL1022.Contig1_All	2481	1034	23.2309	1083	25.1397	gi|224086707|ref|XP_002307940.1|	1351.7	0	predicted protein [Populus trichocarpa] >gi|222853916|gb|EEE91463.1| predicted protein [Populus trichocarpa]	gi|157313301|gb|EF568775.1|	839	0	Prunus persica alpha-L-arabinofuranosidase protein mRNA, complete cds	sp|Q9SG80|ASD1_ARATH	988	0	Alpha-L-arabinofuranosidase 1 OS=Arabidopsis thaliana GN=ASD1 PE=1 SV=1
CL1022.Contig2_All	2349	271	6.4307	263	6.4481	gi|224086707|ref|XP_002307940.1|	1314.7	0	predicted protein [Populus trichocarpa] >gi|222853916|gb|EEE91463.1| predicted protein [Populus trichocarpa]	gi|157313301|gb|EF568775.1|	846	0	Prunus persica alpha-L-arabinofuranosidase protein mRNA, complete cds	sp|Q9SG80|ASD1_ARATH	988	0	Alpha-L-arabinofuranosidase 1 OS=Arabidopsis thaliana GN=ASD1 PE=1 SV=1
CL1022.Contig3_All	1056	52	2.7448	47	2.5633	gi|224086707|ref|XP_002307940.1|	527.7	1e-148	predicted protein [Populus trichocarpa] >gi|222853916|gb|EEE91463.1| predicted protein [Populus trichocarpa]	gi|160953594|emb|CU224449.1|	589	1e-165	Populus EST from leave	sp|Q9SG80|ASD1_ARATH	360	8e-100	Alpha-L-arabinofuranosidase 1 OS=Arabidopsis thaliana GN=ASD1 PE=1 SV=1
CL10220.Contig1_All	479	34	3.9565	27	3.2463	gi|224144212|ref|XP_002325222.1|	79.7	1e-14	predicted protein [Populus trichocarpa] >gi|118487149|gb|ABK95403.1| unknown [Populus trichocarpa] >gi|222866656|gb|EEF03787.1| predicted protein [Populus trichocarpa]	gi|449528394|ref|XM_004171142.1|	61.9	6e-07	PREDICTED: Cucumis sativus uncharacterized LOC101214679, transcript variant 2 (LOC101214679), mRNA	--	--	--	--
CL10220.Contig2_All	821	73	4.9562	52	3.6477	gi|224090417|ref|XP_002308983.1|	312	7e-84	predicted protein [Populus trichocarpa] >gi|222854959|gb|EEE92506.1| predicted protein [Populus trichocarpa]	gi|160956133|emb|CU225803.1|	698	0	Populus EST from leave	--	--	--	--
CL10221.Contig1_All	423	39	5.1392	46	6.2629	gi|224123318|ref|XP_002319049.1|	65.9	2e-10	predicted protein [Populus trichocarpa] >gi|222857425|gb|EEE94972.1| predicted protein [Populus trichocarpa]	gi|158534097|gb|AC213081.1|	815	0	Populus trichocarpa clone POP002-D20, complete sequence	sp|Q0WKV3|PPR36_ARATH	136	5e-33	Pentatricopeptide repeat-containing protein At1g12300, mitochondrial OS=Arabidopsis thaliana GN=At1g12300 PE=2 SV=1
CL10222.Contig1_All	1136	19	0.9323	17	0.8618	gi|224055327|ref|XP_002298482.1|	312.8	7e-84	20G-Fe(II) oxidoreductase [Populus trichocarpa] >gi|222845740|gb|EEE83287.1| 20G-Fe(II) oxidoreductase [Populus trichocarpa]	gi|224055326|ref|XM_002298446.1|	922	0	Populus trichocarpa 20G-Fe(II) oxidoreductase, mRNA	sp|D4N502|DIOX3_PAPSO	54.7	1e-07	Codeine O-demethylase OS=Papaver somniferum GN=CODM PE=1 SV=1
CL10222.Contig2_All	1149	11	0.5336	10	0.5012	gi|224055327|ref|XP_002298482.1|	312.8	7e-84	20G-Fe(II) oxidoreductase [Populus trichocarpa] >gi|222845740|gb|EEE83287.1| 20G-Fe(II) oxidoreductase [Populus trichocarpa]	gi|224055326|ref|XM_002298446.1|	922	0	Populus trichocarpa 20G-Fe(II) oxidoreductase, mRNA	sp|D4N502|DIOX3_PAPSO	54.7	1e-07	Codeine O-demethylase OS=Papaver somniferum GN=CODM PE=1 SV=1
CL10223.Contig1_All	318	34	5.9597	47	8.512	gi|224063323|ref|XP_002301096.1|	201.8	2e-51	predicted protein [Populus trichocarpa] >gi|222842822|gb|EEE80369.1| predicted protein [Populus trichocarpa]	gi|359492490|ref|XM_002283789.2|	58	6e-06	PREDICTED: Vitis vinifera chromosome-associated kinesin KIF4-like (LOC100247280), mRNA	--	--	--	--
CL10223.Contig2_All	275	31	6.2835	25	5.2356	gi|224113909|ref|XP_002332472.1|	176.4	1e-43	predicted protein [Populus trichocarpa] >gi|222832555|gb|EEE71032.1| predicted protein [Populus trichocarpa]	gi|359492490|ref|XM_002283789.2|	60	1e-06	PREDICTED: Vitis vinifera chromosome-associated kinesin KIF4-like (LOC100247280), mRNA	--	--	--	--
CL10224.Contig1_All	401	162	22.5186	218	31.3092	gi|224090821|ref|XP_002309096.1|	191.8	2e-48	predicted protein [Populus trichocarpa] >gi|118485531|gb|ABK94618.1| unknown [Populus trichocarpa] >gi|222855072|gb|EEE92619.1| predicted protein [Populus trichocarpa]	gi|160959195|emb|CU227423.1|	753	0	Populus EST from severe drought-stressed leaves	--	--	--	--
CL10224.Contig2_All	1156	1026	49.4722	1122	55.8977	gi|224140323|ref|XP_002323532.1|	313.2	5e-84	predicted protein [Populus trichocarpa] >gi|118488121|gb|ABK95880.1| unknown [Populus trichocarpa] >gi|222868162|gb|EEF05293.1| predicted protein [Populus trichocarpa]	gi|160959195|emb|CU227423.1|	398	1e-108	Populus EST from severe drought-stressed leaves	sp|Q8LGG8|USPAL_ARATH	52	7e-07	Universal stress protein A-like protein OS=Arabidopsis thaliana GN=At3g01520 PE=1 SV=2
CL10225.Contig1_All	867	218	14.0155	205	13.6174	gi|359478454|ref|XP_002285704.2|	321.6	1e-86	PREDICTED: transcription initiation factor TFIID subunit 7-like [Vitis vinifera]	gi|359478453|ref|XM_002285668.2|	331	7e-88	PREDICTED: Vitis vinifera transcription initiation factor TFIID subunit 7-like (LOC100258782), mRNA	--	--	--	--
CL10225.Contig2_All	779	52	3.7208	55	4.0662	gi|359478454|ref|XP_002285704.2|	316.6	2e-85	PREDICTED: transcription initiation factor TFIID subunit 7-like [Vitis vinifera]	gi|359478453|ref|XM_002285668.2|	331	6e-88	PREDICTED: Vitis vinifera transcription initiation factor TFIID subunit 7-like (LOC100258782), mRNA	--	--	--	--
CL10226.Contig1_All	223	28	6.9988	18	4.6486	gi|224144403|ref|XP_002325278.1|	87.8	5e-17	nucleosome/chromatin assembly factor group [Populus trichocarpa] >gi|222862153|gb|EEE99659.1| nucleosome/chromatin assembly factor group [Populus trichocarpa]	gi|224144402|ref|XM_002325242.1|	194	3e-47	Populus trichocarpa nucleosome/chromatin assembly factor group (NFE902), mRNA	--	--	--	--
CL10226.Contig2_All	842	169	11.1878	176	12.0382	gi|224144403|ref|XP_002325278.1|	352.8	3e-96	nucleosome/chromatin assembly factor group [Populus trichocarpa] >gi|222862153|gb|EEE99659.1| nucleosome/chromatin assembly factor group [Populus trichocarpa]	gi|224122769|ref|XM_002330437.1|	577	1e-162	Populus trichocarpa nucleosome/chromatin assembly factor group (NFE901), mRNA	--	--	--	--
CL10227.Contig1_All	321	13	2.2574	4	0.7177	gi|224132018|ref|XP_002321235.1|	112.5	2e-24	predicted protein [Populus trichocarpa] >gi|222862008|gb|EEE99550.1| predicted protein [Populus trichocarpa]	gi|224132017|ref|XM_002321199.1|	315	2e-83	Populus trichocarpa predicted protein, mRNA	--	--	--	--
CL10227.Contig2_All	343	14	2.2751	17	2.8544	gi|224132018|ref|XP_002321235.1|	119.4	1e-26	predicted protein [Populus trichocarpa] >gi|222862008|gb|EEE99550.1| predicted protein [Populus trichocarpa]	gi|224132017|ref|XM_002321199.1|	329	1e-87	Populus trichocarpa predicted protein, mRNA	--	--	--	--
CL10228.Contig1_All	854	731	47.7124	698	47.0714	gi|224111696|ref|XP_002315945.1|	235	1e-60	predicted protein [Populus trichocarpa] >gi|222864985|gb|EEF02116.1| predicted protein [Populus trichocarpa]	gi|349708077|emb|FQ395535.1|	262	5e-67	Vitis vinifera clone SS0AFA15YG22	sp|Q40742|RAD23_ORYSJ	157	7e-39	Probable DNA repair protein RAD23 OS=Oryza sativa subsp. japonica GN=RAD23 PE=1 SV=2
CL10228.Contig2_All	478	173	20.1739	166	20.0004	gi|224101717|ref|XP_002312393.1|	221.5	4e-57	predicted protein [Populus trichocarpa] >gi|222852213|gb|EEE89760.1| predicted protein [Populus trichocarpa]	gi|349708077|emb|FQ395535.1|	256	2e-65	Vitis vinifera clone SS0AFA15YG22	sp|Q40742|RAD23_ORYSJ	161	1e-40	Probable DNA repair protein RAD23 OS=Oryza sativa subsp. japonica GN=RAD23 PE=1 SV=2
CL10229.Contig1_All	328	33	5.608	10	1.7558	--	--	--	--	--	--	--	--	--	--	--	--
CL1023.Contig1_All	823	149	10.0916	137	9.5869	gi|224113615|ref|XP_002316521.1|	411	1e-113	predicted protein [Populus trichocarpa] >gi|222859586|gb|EEE97133.1| predicted protein [Populus trichocarpa]	gi|359494839|ref|XM_003634803.1|	119	5e-24	PREDICTED: Vitis vinifera pentatricopeptide repeat-containing protein At1g61870, mitochondrial-like (LOC100854516), mRNA	sp|Q8LE47|PPR87_ARATH	323	7e-89	Pentatricopeptide repeat-containing protein At1g61870, mitochondrial OS=Arabidopsis thaliana GN=PPR336 PE=2 SV=2
CL1023.Contig2_All	826	121	8.1654	149	10.3888	gi|224113615|ref|XP_002316521.1|	511.9	4e-144	predicted protein [Populus trichocarpa] >gi|222859586|gb|EEE97133.1| predicted protein [Populus trichocarpa]	gi|297837242|ref|XM_002886457.1|	75.8	7e-11	Arabidopsis lyrata subsp. lyrata pentatricopeptide repeat-containing protein, mRNA	sp|Q8LE47|PPR87_ARATH	323	7e-89	Pentatricopeptide repeat-containing protein At1g61870, mitochondrial OS=Arabidopsis thaliana GN=PPR336 PE=2 SV=2
CL10230.Contig1_All	429	57	7.4061	48	6.4438	gi|224095662|ref|XP_002310428.1|	88.2	4e-17	predicted protein [Populus trichocarpa] >gi|222853331|gb|EEE90878.1| predicted protein [Populus trichocarpa]	gi|156523311|gb|AC209040.1|	280	1e-72	Populus trichocarpa clone POP050-H13, complete sequence	--	--	--	--
CL10230.Contig2_All	1322	218	9.1917	202	8.7999	gi|224095662|ref|XP_002310428.1|	513.8	2e-144	predicted protein [Populus trichocarpa] >gi|222853331|gb|EEE90878.1| predicted protein [Populus trichocarpa]	gi|156523311|gb|AC209040.1|	2472	0	Populus trichocarpa clone POP050-H13, complete sequence	sp|Q8LB17|Y3846_ARATH	68.6	8e-12	Uncharacterized protein At3g58460 OS=Arabidopsis thaliana GN=At3g58460 PE=1 SV=2
CL10231.Contig1_All	474	63	7.4086	4	0.486	gi|348682162|gb|EGZ21978.1|	62	3e-09	hypothetical protein PHYSODRAFT_329861 [Phytophthora sojae] >gi|348682165|gb|EGZ21981.1| hypothetical protein PHYSODRAFT_488121 [Phytophthora sojae] >gi|348682196|gb|EGZ22012.1| hypothetical protein PHYSODRAFT_492484 [Phytophthora sojae]	--	--	--	--	--	--	--	--
CL10231.Contig2_All	1496	1241	46.2394	23	0.8854	gi|326533040|dbj|BAJ93492.1|	90.1	1e-16	predicted protein [Hordeum vulgare subsp. vulgare]	--	--	--	--	sp|Q4VZL0|YCF1_CUCSA	49.7	4e-06	Putative membrane protein ycf1 OS=Cucumis sativus GN=ycf1-A PE=3 SV=2
CL10232.Contig1_All	247	18	4.0621	9	2.0985	gi|224110170|ref|XP_002315436.1|	83.2	1e-15	predicted protein [Populus trichocarpa] >gi|222864476|gb|EEF01607.1| predicted protein [Populus trichocarpa]	gi|224110169|ref|XM_002315400.1|	208	2e-51	Populus trichocarpa predicted protein, mRNA	--	--	--	--
CL10233.Contig1_All	296	19	3.5779	35	6.8098	--	--	--	--	--	--	--	--	--	--	--	--
CL10233.Contig2_All	1673	444	14.7931	447	15.3876	gi|224145189|ref|XP_002325558.1|	822.4	0	predicted protein [Populus trichocarpa] >gi|222862433|gb|EEE99939.1| predicted protein [Populus trichocarpa]	gi|359493177|ref|XM_002267646.2|	678	0	PREDICTED: Vitis vinifera uncharacterized LOC100248770 (LOC100248770), mRNA	--	--	--	--
CL10234.Contig1_All	2271	655	16.0767	580	14.7086	gi|224056361|ref|XP_002298820.1|	1123.6	0	predicted protein [Populus trichocarpa] >gi|222846078|gb|EEE83625.1| predicted protein [Populus trichocarpa]	gi|359494078|ref|XM_002277355.2|	1195	0	PREDICTED: Vitis vinifera 65-kDa microtubule-associated protein 1-like (LOC100267550), mRNA	sp|Q9FLP0|MA651_ARATH	875	0	65-kDa microtubule-associated protein 1 OS=Arabidopsis thaliana GN=MAP65-1 PE=1 SV=1
CL10234.Contig2_All	1154	680	32.8454	543	27.099	gi|224114485|ref|XP_002316774.1|	628.6	6e-179	predicted protein [Populus trichocarpa] >gi|222859839|gb|EEE97386.1| predicted protein [Populus trichocarpa]	gi|359494078|ref|XM_002277355.2|	529	1e-147	PREDICTED: Vitis vinifera 65-kDa microtubule-associated protein 1-like (LOC100267550), mRNA	sp|Q9FLP0|MA651_ARATH	491	3e-139	65-kDa microtubule-associated protein 1 OS=Arabidopsis thaliana GN=MAP65-1 PE=1 SV=1
CL10234.Contig3_All	2203	429	10.8546	371	9.6988	gi|224056361|ref|XP_002298820.1|	1108.6	0	predicted protein [Populus trichocarpa] >gi|222846078|gb|EEE83625.1| predicted protein [Populus trichocarpa]	gi|359494078|ref|XM_002277355.2|	1197	0	PREDICTED: Vitis vinifera 65-kDa microtubule-associated protein 1-like (LOC100267550), mRNA	sp|Q9FLP0|MA651_ARATH	877	0	65-kDa microtubule-associated protein 1 OS=Arabidopsis thaliana GN=MAP65-1 PE=1 SV=1
CL10235.Contig1_All	2208	16297	411.415	14666	382.536	gi|224094765|ref|XP_002310227.1|	213.8	1e-53	predicted protein [Populus trichocarpa] >gi|118486118|gb|ABK94902.1| unknown [Populus trichocarpa] >gi|222853130|gb|EEE90677.1| predicted protein [Populus trichocarpa]	gi|160951381|emb|CU223684.1|	1140	0	Populus EST from leave	--	--	--	--
CL10235.Contig2_All	365	263	40.1638	296	46.7044	--	--	--	--	gi|224094764|ref|XM_002310191.1|	182	2e-43	Populus trichocarpa predicted protein, mRNA	--	--	--	--
CL10236.Contig1_All	205	44	11.9638	67	18.8226	gi|224113557|ref|XP_002332553.1|	124.4	5e-28	cc-nbs-lrr resistance protein [Populus trichocarpa] >gi|222833029|gb|EEE71506.1| cc-nbs-lrr resistance protein [Populus trichocarpa]	gi|224113556|ref|XM_002332516.1|	309	6e-82	Populus trichocarpa cc-nbs-lrr resistance protein, mRNA	--	--	--	--
CL10236.Contig2_All	937	323	19.2147	251	15.4274	gi|224122732|ref|XP_002330456.1|	58.5	1e-07	predicted protein [Populus trichocarpa] >gi|222871868|gb|EEF08999.1| predicted protein [Populus trichocarpa]	gi|224108204|ref|XM_002333384.1|	959	0	Populus trichocarpa cc-nbs-lrr resistance protein, mRNA	sp|Q7XBQ9|RGA2_SOLBU	62	5e-10	Disease resistance protein RGA2 OS=Solanum bulbocastanum GN=RGA2 PE=1 SV=1
CL10236.Contig3_All	324	84	14.4513	54	9.5986	gi|224122732|ref|XP_002330456.1|	160.6	6e-39	predicted protein [Populus trichocarpa] >gi|222871868|gb|EEF08999.1| predicted protein [Populus trichocarpa]	gi|157410316|gb|AC210555.1|	341	3e-91	Populus trichocarpa clone POP104-J03, complete sequence	--	--	--	--
CL10236.Contig4_All	246	35	7.9306	19	4.4481	gi|224127160|ref|XP_002320002.1|	130.6	7e-30	predicted protein [Populus trichocarpa] >gi|222860775|gb|EEE98317.1| predicted protein [Populus trichocarpa]	gi|165905712|gb|AC216681.1|	260	6e-67	Populus trichocarpa clone POP023-F05, complete sequence	--	--	--	--
CL10237.Contig1_All	1391	456	18.273	333	13.7872	gi|224109640|ref|XP_002315264.1|	894.4	0	predicted protein [Populus trichocarpa] >gi|222864304|gb|EEF01435.1| predicted protein [Populus trichocarpa]	gi|160957815|emb|CU231830.1|	343	3e-91	Populus EST from mild drought-stressed leaves	sp|P93203|MFP1_SOLLC	60.1	3e-09	MAR-binding filament-like protein 1 OS=Solanum lycopersicum GN=MFP1 PE=1 SV=1
CL10237.Contig2_All	289	41	7.9078	38	7.5726	gi|224100891|ref|XP_002312055.1|	194.5	4e-49	predicted protein [Populus trichocarpa] >gi|222851875|gb|EEE89422.1| predicted protein [Populus trichocarpa]	gi|160957815|emb|CU231830.1|	161	5e-37	Populus EST from mild drought-stressed leaves	--	--	--	--
CL10238.Contig1_All	1390	227	9.103	298	12.347	gi|224106441|ref|XP_002314167.1|	745.7	0	predicted protein [Populus trichocarpa] >gi|222850575|gb|EEE88122.1| predicted protein [Populus trichocarpa]	gi|470116980|ref|XM_004294601.1|	428	1e-117	PREDICTED: Fragaria vesca subsp. vesca uncharacterized LOC101293565 (LOC101293565), mRNA	--	--	--	--
CL10238.Contig2_All	318	50	8.7642	66	11.953	gi|224106441|ref|XP_002314167.1|	209.9	9e-54	predicted protein [Populus trichocarpa] >gi|222850575|gb|EEE88122.1| predicted protein [Populus trichocarpa]	gi|224106440|ref|XM_002314131.1|	583	1e-164	Populus trichocarpa predicted protein, mRNA	--	--	--	--
CL10239.Contig1_All	1195	113	5.2709	131	6.3134	gi|224141481|ref|XP_002324100.1|	36.6	3e-152	predicted protein [Populus trichocarpa] >gi|222867102|gb|EEF04233.1| predicted protein [Populus trichocarpa]	gi|359489020|ref|XM_003633810.1|	99.6	7e-18	PREDICTED: Vitis vinifera uncharacterized LOC100262792 (LOC100262792), mRNA	--	--	--	--
CL10239.Contig2_All	1054	40	2.1154	71	3.8795	gi|224141481|ref|XP_002324100.1|	536.2	3e-151	predicted protein [Populus trichocarpa] >gi|222867102|gb|EEF04233.1| predicted protein [Populus trichocarpa]	gi|359489020|ref|XM_003633810.1|	99.6	6e-18	PREDICTED: Vitis vinifera uncharacterized LOC100262792 (LOC100262792), mRNA	--	--	--	--
CL1024.Contig1_All	835	30	2.0027	25	1.7243	gi|224105927|ref|XP_002313981.1|	368.2	8e-101	predicted protein [Populus trichocarpa] >gi|222850389|gb|EEE87936.1| predicted protein [Populus trichocarpa]	gi|359478780|ref|XM_002276358.2|	535	1e-149	PREDICTED: Vitis vinifera 6-phosphofructo-2-kinase/fructose-2,6-biphosphatase 3-like (LOC100244966), mRNA	sp|Q9MB58|F26_ARATH	344	4e-95	6-phosphofructo-2-kinase/fructose-2,6-bisphosphatase OS=Arabidopsis thaliana GN=FKFBP PE=1 SV=1
CL1024.Contig2_All	886	3	0.1887	3	0.195	gi|224105927|ref|XP_002313981.1|	368.2	9e-101	predicted protein [Populus trichocarpa] >gi|222850389|gb|EEE87936.1| predicted protein [Populus trichocarpa]	gi|359478780|ref|XM_002276358.2|	535	1e-149	PREDICTED: Vitis vinifera 6-phosphofructo-2-kinase/fructose-2,6-biphosphatase 3-like (LOC100244966), mRNA	sp|Q9MB58|F26_ARATH	344	4e-95	6-phosphofructo-2-kinase/fructose-2,6-bisphosphatase OS=Arabidopsis thaliana GN=FKFBP PE=1 SV=1
CL1024.Contig3_All	845	55	3.6281	47	3.2033	gi|224105927|ref|XP_002313981.1|	334.7	1e-90	predicted protein [Populus trichocarpa] >gi|222850389|gb|EEE87936.1| predicted protein [Populus trichocarpa]	gi|359478780|ref|XM_002276358.2|	472	1e-130	PREDICTED: Vitis vinifera 6-phosphofructo-2-kinase/fructose-2,6-biphosphatase 3-like (LOC100244966), mRNA	sp|Q9MB58|F26_ARATH	315	2e-86	6-phosphofructo-2-kinase/fructose-2,6-bisphosphatase OS=Arabidopsis thaliana GN=FKFBP PE=1 SV=1
CL10240.Contig1_All	1204	1207	55.8795	951	45.4897	gi|224128632|ref|XP_002320380.1|	554.3	1e-156	predicted protein [Populus trichocarpa] >gi|222861153|gb|EEE98695.1| predicted protein [Populus trichocarpa]	gi|256782829|gb|AC182665.2|	1425	0	Populus trichocarpa clone Pop1-18D20, complete sequence	sp|Q9LYC1|GID1B_ARATH	467	7e-132	Gibberellin receptor GID1B OS=Arabidopsis thaliana GN=GID1B PE=1 SV=1
CL10241.Contig1_All	1252	349	15.5379	342	15.7319	gi|462414548|gb|EMJ19285.1|	416	6e-115	hypothetical protein PRUPE_ppa006435mg [Prunus persica]	gi|158341706|gb|AC212852.1|	170	2e-39	Populus trichocarpa clone POP106-O02, complete sequence	sp|Q6IDS6|C3H35_ARATH	355	4e-98	E3 ubiquitin-protein ligase makorin OS=Arabidopsis thaliana GN=MKRN PE=2 SV=1
CL10241.Contig2_All	302	101	18.6417	75	14.3026	gi|224055241|ref|XP_002298439.1|	215.7	1e-55	predicted protein [Populus trichocarpa] >gi|222845697|gb|EEE83244.1| predicted protein [Populus trichocarpa]	gi|156119648|gb|AC208479.1|	351	3e-94	Populus trichocarpa clone JGIACSB1081-D15, complete sequence	sp|Q5ZA07|C3H41_ORYSJ	193	2e-50	E3 ubiquitin-protein ligase makorin OS=Oryza sativa subsp. japonica GN=MKRN PE=2 SV=1
CL10241.Contig3_All	848	57	3.7467	49	3.3278	gi|462414548|gb|EMJ19285.1|	375.9	4e-103	hypothetical protein PRUPE_ppa006435mg [Prunus persica]	gi|156119648|gb|AC208479.1|	668	0	Populus trichocarpa clone JGIACSB1081-D15, complete sequence	sp|Q6IDS6|C3H35_ARATH	314	5e-86	E3 ubiquitin-protein ligase makorin OS=Arabidopsis thaliana GN=MKRN PE=2 SV=1
CL10242.Contig1_All	367	12	1.8226	11	1.7262	gi|462397125|gb|EMJ02924.1|	162.9	1e-39	hypothetical protein PRUPE_ppa003067mg [Prunus persica]	gi|255560274|ref|XM_002521109.1|	105	3e-20	Ricinus communis protein binding protein, putative, mRNA	--	--	--	--
CL10242.Contig2_All	318	9	1.5776	8	1.4488	gi|462397125|gb|EMJ02924.1|	132.9	1e-30	hypothetical protein PRUPE_ppa003067mg [Prunus persica]	gi|255560274|ref|XM_002521109.1|	95.6	3e-17	Ricinus communis protein binding protein, putative, mRNA	--	--	--	--
CL10242.Contig3_All	966	88	5.0778	79	4.7099	gi|462397125|gb|EMJ02924.1|	68.9	1e-10	hypothetical protein PRUPE_ppa003067mg [Prunus persica]	gi|255560274|ref|XM_002521109.1|	107	2e-20	Ricinus communis protein binding protein, putative, mRNA	--	--	--	--
CL10243.Contig1_All	365	25	3.8178	9	1.4201	gi|255543357|ref|XP_002512741.1|	206.5	1e-52	heat shock protein, putative [Ricinus communis] >gi|223547752|gb|EEF49244.1| heat shock protein, putative [Ricinus communis]	gi|156119659|gb|AC208490.1|	448	1e-123	Populus trichocarpa clone JGIACSB261-L10, complete sequence	sp|Q9S9N1|HSP7E_ARATH	203	2e-53	Heat shock 70 kDa protein 5 OS=Arabidopsis thaliana GN=HSP70-5 PE=2 SV=1
CL10243.Contig2_All	217	4	1.0275	1	0.2654	gi|452820253|gb|EME27298.1|	123.2	1e-27	molecular chaperone DnaK [Galdieria sulphuraria]	gi|460199517|gb|GABL01061772.1|	119	1e-24	TSA: Camelina sativa comp58378_c0_seq1 transcribed RNA sequence	sp|Q01899|HSP7M_PHAVU	119	3e-28	Heat shock 70 kDa protein, mitochondrial OS=Phaseolus vulgaris PE=2 SV=1
CL10244.Contig1_All	1178	1639	77.5542	1777	86.8763	gi|224075563|ref|XP_002304685.1|	557.8	1e-157	predicted protein [Populus trichocarpa] >gi|222842117|gb|EEE79664.1| predicted protein [Populus trichocarpa]	gi|356525163|ref|XM_003531149.1|	143	5e-31	PREDICTED: Glycine max uncharacterized protein LOC100820087 (LOC100820087), mRNA	sp|Q6NMK1|GXM1_ARATH	214	8e-56	Glucuronoxylan 4-O-methyltransferase 1 OS=Arabidopsis thaliana GN=GXM1 PE=1 SV=1
CL10245.Contig1_All	1451	45	1.7287	41	1.6273	gi|224089268|ref|XP_002308668.1|	310.8	8e-178	predicted protein [Populus trichocarpa] >gi|222854644|gb|EEE92191.1| predicted protein [Populus trichocarpa]	gi|359475822|ref|XM_002285138.2|	250	4e-63	PREDICTED: Vitis vinifera UDP-sugar transporter UST74c-like (LOC100256151), mRNA	sp|Q941R4|GONS1_ARATH	54.7	3e-15	GDP-mannose transporter GONST1 OS=Arabidopsis thaliana GN=GONST1 PE=1 SV=2
CL10245.Contig2_All	551	2	0.2023	8	0.8362	gi|224089268|ref|XP_002308668.1|	309.3	2e-83	predicted protein [Populus trichocarpa] >gi|222854644|gb|EEE92191.1| predicted protein [Populus trichocarpa]	gi|359475822|ref|XM_002285138.2|	176	2e-41	PREDICTED: Vitis vinifera UDP-sugar transporter UST74c-like (LOC100256151), mRNA	--	--	--	--
CL10245.Contig3_All	1434	26	1.0106	27	1.0844	gi|224089268|ref|XP_002308668.1|	642.5	0	predicted protein [Populus trichocarpa] >gi|222854644|gb|EEE92191.1| predicted protein [Populus trichocarpa]	gi|359475822|ref|XM_002285138.2|	400	1e-108	PREDICTED: Vitis vinifera UDP-sugar transporter UST74c-like (LOC100256151), mRNA	sp|Q941R4|GONS1_ARATH	93.6	3e-19	GDP-mannose transporter GONST1 OS=Arabidopsis thaliana GN=GONST1 PE=1 SV=2
CL10246.Contig1_All	1842	176	5.3259	105	3.2829	gi|462417090|gb|EMJ21827.1|	857.4	0	hypothetical protein PRUPE_ppa002321mg [Prunus persica]	gi|225450355|ref|XM_002274854.1|	634	1e-179	PREDICTED: Vitis vinifera uncharacterized LOC100258075 (LOC100258075), mRNA	sp|Q5Z6X0|CIPKP_ORYSJ	93.6	3e-19	CBL-interacting protein kinase 25 OS=Oryza sativa subsp. japonica GN=CIPK25 PE=2 SV=1
CL10246.Contig2_All	1885	180	5.3227	77	2.3525	gi|462417090|gb|EMJ21827.1|	334	0	hypothetical protein PRUPE_ppa002321mg [Prunus persica]	gi|225450355|ref|XM_002274854.1|	599	1e-168	PREDICTED: Vitis vinifera uncharacterized LOC100258075 (LOC100258075), mRNA	sp|Q5Z6X0|CIPKP_ORYSJ	90.9	2e-18	CBL-interacting protein kinase 25 OS=Oryza sativa subsp. japonica GN=CIPK25 PE=2 SV=1
CL10247.Contig1_All	473	156	18.3838	121	14.7327	gi|224131036|ref|XP_002328437.1|	254.6	4e-67	predicted protein [Populus trichocarpa] >gi|118483017|gb|ABK93420.1| unknown [Populus trichocarpa] >gi|222838152|gb|EEE76517.1| predicted protein [Populus trichocarpa]	gi|224131035|ref|XM_002328401.1|	805	0	Populus trichocarpa predicted protein, mRNA	sp|Q84MC0|UGPI4_ARATH	62.8	9e-11	Uncharacterized GPI-anchored protein At3g06035 OS=Arabidopsis thaliana GN=At3g06035 PE=2 SV=1
CL10247.Contig2_All	461	44	5.3201	58	7.2458	gi|224131032|ref|XP_002328436.1|	256.5	1e-67	predicted protein [Populus trichocarpa] >gi|222838151|gb|EEE76516.1| predicted protein [Populus trichocarpa]	gi|224131031|ref|XM_002328400.1|	775	0	Populus trichocarpa predicted protein, mRNA	sp|Q84MC0|UGPI4_ARATH	59.3	9e-10	Uncharacterized GPI-anchored protein At3g06035 OS=Arabidopsis thaliana GN=At3g06035 PE=2 SV=1
CL10248.Contig1_All	807	45	3.1082	95	6.7797	gi|224057258|ref|XP_002299198.1|	360.9	1e-98	predicted protein [Populus trichocarpa] >gi|222846456|gb|EEE84003.1| predicted protein [Populus trichocarpa]	gi|156564451|gb|AC209106.1|	563	1e-157	Populus trichocarpa clone POP088-K11, complete sequence	sp|Q9M7X9|CITRX_ARATH	242	2e-64	Thioredoxin-like protein CITRX, chloroplastic OS=Arabidopsis thaliana GN=At3g06730 PE=1 SV=1
CL10248.Contig2_All	757	6	0.4418	20	1.5216	gi|224057258|ref|XP_002299198.1|	360.9	1e-98	predicted protein [Populus trichocarpa] >gi|222846456|gb|EEE84003.1| predicted protein [Populus trichocarpa]	gi|156564451|gb|AC209106.1|	563	1e-158	Populus trichocarpa clone POP088-K11, complete sequence	sp|Q9M7X9|CITRX_ARATH	242	2e-64	Thioredoxin-like protein CITRX, chloroplastic OS=Arabidopsis thaliana GN=At3g06730 PE=1 SV=1
CL10249.Contig1_All	296	13	2.4481	11	2.1402	gi|224140805|ref|XP_002323769.1|	68.9	2e-11	kip-related cyclin-dependent kinase inhibitor 1 [Populus trichocarpa] >gi|222866771|gb|EEF03902.1| kip-related cyclin-dependent kinase inhibitor 1 [Populus trichocarpa]	gi|157385064|gb|AC210516.1|	416	1e-114	Populus trichocarpa clone POP119-J20, complete sequence	--	--	--	--
CL10249.Contig2_All	313	7	1.2466	15	2.76	gi|224140805|ref|XP_002323769.1|	68.9	2e-11	kip-related cyclin-dependent kinase inhibitor 1 [Populus trichocarpa] >gi|222866771|gb|EEF03902.1| kip-related cyclin-dependent kinase inhibitor 1 [Populus trichocarpa]	gi|157385064|gb|AC210516.1|	533	1e-149	Populus trichocarpa clone POP119-J20, complete sequence	--	--	--	--
CL1025.Contig1_All	328	6	1.0196	2	0.3512	gi|224146333|ref|XP_002325969.1|	187.2	6e-47	predicted protein [Populus trichocarpa] >gi|222862844|gb|EEF00351.1| predicted protein [Populus trichocarpa]	gi|460392482|ref|XM_004241797.1|	99.6	2e-18	PREDICTED: Solanum lycopersicum probable peptide/nitrate transporter At1g22540-like (LOC101256981), mRNA	sp|Q0WP01|PTR9_ARATH	175	6e-45	Probable peptide/nitrate transporter At1g22540 OS=Arabidopsis thaliana GN=At1g22540 PE=2 SV=1
CL1025.Contig2_All	338	8	1.3193	7	1.1927	gi|224146337|ref|XP_002325970.1|	197.2	6e-50	predicted protein [Populus trichocarpa] >gi|222862845|gb|EEF00352.1| predicted protein [Populus trichocarpa]	gi|460392482|ref|XM_004241797.1|	99.6	2e-18	PREDICTED: Solanum lycopersicum probable peptide/nitrate transporter At1g22540-like (LOC101256981), mRNA	sp|Q0WP01|PTR9_ARATH	163	2e-41	Probable peptide/nitrate transporter At1g22540 OS=Arabidopsis thaliana GN=At1g22540 PE=2 SV=1
CL10251.Contig1_All	232	2	0.4805	0	0	gi|1778378|gb|AAB72115.1|	61.6	4e-09	NAP1Ps [Pisum sativum]	gi|162532376|gb|AC215848.1|	258	2e-66	Populus trichocarpa clone POP021-J23, complete sequence	--	--	--	--
CL10251.Contig2_All	273	5	1.0209	3	0.6329	gi|224070567|ref|XP_002303171.1|	57.4	8e-08	nucleosome/chromatin assembly factor group [Populus trichocarpa] >gi|222840603|gb|EEE78150.1| nucleosome/chromatin assembly factor group [Populus trichocarpa]	gi|162532376|gb|AC215848.1|	258	3e-66	Populus trichocarpa clone POP021-J23, complete sequence	--	--	--	--
CL10252.Contig1_All	202	15	4.1392	21	5.9872	gi|229463803|gb|ACQ66327.1|	130.6	7e-30	N-acetylglutamate kinase [Populus maximowiczii x Populus nigra]	gi|229463802|gb|FJ899843.1|	377	1e-102	Populus maximowiczii x Populus nigra clone NAGK2 N-acetylglutamate kinase mRNA, partial cds	sp|Q9SCL7|NAGK_ARATH	114	1e-26	Acetylglutamate kinase, chloroplastic OS=Arabidopsis thaliana GN=NAGK PE=1 SV=1
CL10252.Contig2_All	1032	242	13.071	287	16.0163	gi|224115652|ref|XP_002332109.1|	592.4	4e-168	predicted protein [Populus trichocarpa] >gi|222874929|gb|EEF12060.1| predicted protein [Populus trichocarpa]	gi|229463800|gb|FJ899842.1|	1721	0	Populus maximowiczii x Populus nigra clone NAGK1 N-acetylglutamate kinase mRNA, partial cds	sp|Q9SCL7|NAGK_ARATH	462	1e-130	Acetylglutamate kinase, chloroplastic OS=Arabidopsis thaliana GN=NAGK PE=1 SV=1
CL10253.Contig1_All	1631	908	31.0316	919	32.4505	gi|224086964|ref|XP_002308019.1|	811.2	0	predicted protein [Populus trichocarpa] >gi|222853995|gb|EEE91542.1| predicted protein [Populus trichocarpa]	gi|168176843|gb|AC217587.1|	1386	0	Populus trichocarpa clone POP031-F05, complete sequence	--	--	--	--
CL10253.Contig2_All	238	23	5.3867	27	6.5335	gi|224139884|ref|XP_002323324.1|	144.8	3e-34	predicted protein [Populus trichocarpa] >gi|222867954|gb|EEF05085.1| predicted protein [Populus trichocarpa]	gi|168176843|gb|AC217587.1|	400	1e-109	Populus trichocarpa clone POP031-F05, complete sequence	--	--	--	--
CL10254.Contig1_All	1158	199	9.5789	186	9.2505	gi|224138940|ref|XP_002326728.1|	426.8	3e-118	predicted protein [Populus trichocarpa] >gi|222834050|gb|EEE72527.1| predicted protein [Populus trichocarpa]	gi|359474551|ref|XM_002278788.2|	220	3e-54	PREDICTED: Vitis vinifera transcription factor bHLH71-like (LOC100248894), mRNA	sp|Q56XR0|BH071_ARATH	281	5e-76	Transcription factor bHLH71 OS=Arabidopsis thaliana GN=BHLH71 PE=1 SV=1
CL10255.Contig1_All	514	23	2.4942	11	1.2325	gi|224109894|ref|XP_002315346.1|	301.2	4e-81	predicted protein [Populus trichocarpa] >gi|222864386|gb|EEF01517.1| predicted protein [Populus trichocarpa]	gi|359486915|ref|XM_002269942.2|	287	6e-75	PREDICTED: Vitis vinifera probable U3 small nucleolar RNA-associated protein 7-like (LOC100241077), mRNA	--	--	--	--
CL10255.Contig2_All	1584	268	9.4309	307	11.162	gi|224109894|ref|XP_002315346.1|	1013.1	0	predicted protein [Populus trichocarpa] >gi|222864386|gb|EEF01517.1| predicted protein [Populus trichocarpa]	gi|359486915|ref|XM_002269942.2|	749	0	PREDICTED: Vitis vinifera probable U3 small nucleolar RNA-associated protein 7-like (LOC100241077), mRNA	sp|Q8H0T9|KTNB1_ARATH	58.9	8e-09	Katanin p80 WD40 repeat-containing subunit B1 homolog OS=Arabidopsis thaliana GN=At5g23430 PE=2 SV=3
CL10256.Contig1_All	1058	230	12.1175	179	9.7438	gi|224132326|ref|XP_002328241.1|	615.1	6e-175	transcription factor E2F [Populus trichocarpa] >gi|222837756|gb|EEE76121.1| transcription factor E2F [Populus trichocarpa]	gi|224132325|ref|XM_002328205.1|	1669	0	Populus trichocarpa transcription factor E2F (E2Fa2-2), mRNA	sp|Q9FV71|E2FB_ARATH	367	8e-102	Transcription factor E2FB OS=Arabidopsis thaliana GN=E2FB PE=1 SV=1
CL10256.Contig2_All	318	46	8.0631	37	6.7009	gi|224102857|ref|XP_002312830.1|	141	5e-33	transcription factor E2F [Populus trichocarpa] >gi|222849238|gb|EEE86785.1| transcription factor E2F [Populus trichocarpa]	gi|224102856|ref|XM_002312794.1|	381	1e-103	Populus trichocarpa transcription factor E2F (E2Fa1-1), mRNA	sp|Q9FV71|E2FB_ARATH	50.8	2e-07	Transcription factor E2FB OS=Arabidopsis thaliana GN=E2FB PE=1 SV=1
CL10257.Contig1_All	1271	89	3.9032	86	3.8968	gi|224075820|ref|XP_002335844.1|	535.4	7e-151	predicted protein [Populus trichocarpa] >gi|222835559|gb|EEE73994.1| predicted protein [Populus trichocarpa]	gi|115414346|emb|CT028807.1|	1051	0	Poplar cDNA sequences	sp|Q9S9M5|WAKLA_ARATH	414	7e-116	Wall-associated receptor kinase-like 1 OS=Arabidopsis thaliana GN=WAKL1 PE=1 SV=1
CL10257.Contig2_All	1181	66	3.1151	50	2.4383	gi|224075820|ref|XP_002335844.1|	666.4	0	predicted protein [Populus trichocarpa] >gi|222835559|gb|EEE73994.1| predicted protein [Populus trichocarpa]	gi|115414346|emb|CT028807.1|	1051	0	Poplar cDNA sequences	sp|Q9S9M5|WAKLA_ARATH	468	2e-132	Wall-associated receptor kinase-like 1 OS=Arabidopsis thaliana GN=WAKL1 PE=1 SV=1
CL10257.Contig3_All	425	17	2.2296	29	3.9298	gi|224053058|ref|XP_002297686.1|	283.5	7e-76	predicted protein [Populus trichocarpa] >gi|222844944|gb|EEE82491.1| predicted protein [Populus trichocarpa]	gi|166091647|gb|AC216916.1|	519	1e-145	Populus trichocarpa clone POP055-M20, complete sequence	sp|Q9S9M5|WAKLA_ARATH	241	1e-64	Wall-associated receptor kinase-like 1 OS=Arabidopsis thaliana GN=WAKL1 PE=1 SV=1
CL10258.Contig1_All	3128	3305	58.8947	2534	46.6551	gi|224134424|ref|XP_002327402.1|	1698.7	0	predicted protein [Populus trichocarpa] >gi|222835956|gb|EEE74377.1| predicted protein [Populus trichocarpa]	gi|90819250|gb|AC183421.2|	2409	0	Populus trichocarpa clone Pop1-23P7, complete sequence	sp|F4I171|MD15A_ARATH	971	0	Mediator of RNA polymerase II transcription subunit 15a OS=Arabidopsis thaliana GN=MED15A PE=1 SV=1
CL10258.Contig2_All	328	134	22.7721	66	11.5886	gi|24461867|gb|AAN62354.1|AF506028_23	63.2	1e-09	CTV.22 [Citrus trifoliata]	gi|158420591|gb|AC212926.1|	394	1e-107	Populus trichocarpa clone POP014-K13, complete sequence	sp|F4I171|MD15A_ARATH	106	3e-24	Mediator of RNA polymerase II transcription subunit 15a OS=Arabidopsis thaliana GN=MED15A PE=1 SV=1
CL10259.Contig1_All	2038	620	16.9574	490	13.8469	gi|224064852|ref|XP_002301583.1|	1121.7	0	predicted protein [Populus trichocarpa] >gi|222843309|gb|EEE80856.1| predicted protein [Populus trichocarpa]	gi|161789306|gb|AC215624.1|	2076	0	Populus trichocarpa clone POP006-B08, complete sequence	sp|Q9LUB7|OBE2_ARATH	850	0	Protein OBERON 2 OS=Arabidopsis thaliana GN=OBE2 PE=1 SV=1
CL10259.Contig2_All	2219	1432	35.9714	1317	34.1812	gi|224064852|ref|XP_002301583.1|	1120.2	0	predicted protein [Populus trichocarpa] >gi|222843309|gb|EEE80856.1| predicted protein [Populus trichocarpa]	gi|161789306|gb|AC215624.1|	2062	0	Populus trichocarpa clone POP006-B08, complete sequence	sp|Q9LUB7|OBE2_ARATH	848	0	Protein OBERON 2 OS=Arabidopsis thaliana GN=OBE2 PE=1 SV=1
CL10260.Contig1_All	1560	1097	39.1971	1069	39.465	gi|224093878|ref|XP_002310031.1|	106.3	1e-21	ABC transporter family protein [Populus trichocarpa] >gi|222852934|gb|EEE90481.1| ABC transporter family protein [Populus trichocarpa]	gi|224093877|ref|XM_002309995.1|	2635	0	Populus trichocarpa ABC transporter family protein, mRNA	sp|Q9LV93|AB5F_ARATH	825	0	ABC transporter F family member 5 OS=Arabidopsis thaliana GN=ABCF5 PE=2 SV=1
CL10260.Contig2_All	202	33	9.1061	19	5.417	gi|224081252|ref|XP_002306353.1|	57.8	6e-08	ABC transporter family protein [Populus trichocarpa] >gi|222855802|gb|EEE93349.1| ABC transporter family protein [Populus trichocarpa]	gi|224081251|ref|XM_002306317.1|	385	1e-104	Populus trichocarpa ABC transporter family protein, mRNA	sp|Q9LV93|AB5F_ARATH	137	1e-33	ABC transporter F family member 5 OS=Arabidopsis thaliana GN=ABCF5 PE=2 SV=1
CL10261.Contig1_All	225	5	1.2387	14	3.5835	gi|6094029|sp|O82574.1|RL21_CYAPA	65.5	2e-10	RecName: Full=60S ribosomal protein L21 >gi|3747003|gb|AAC64142.1| ribosomal protein L21E [Cyanophora paradoxa]	--	--	--	--	sp|O82574|RL21_CYAPA	65.5	7e-12	60S ribosomal protein L21 OS=Cyanophora paradoxa GN=RPL21 PE=2 SV=1
CL10261.Contig2_All	397	52	7.301	1	0.1451	gi|6094029|sp|O82574.1|RL21_CYAPA	152.9	1e-36	RecName: Full=60S ribosomal protein L21 >gi|3747003|gb|AAC64142.1| ribosomal protein L21E [Cyanophora paradoxa]	gi|270135431|gb|BT102383.1|	121	6e-25	Picea glauca clone GQ0186_B10 mRNA sequence	sp|O82574|RL21_CYAPA	152	4e-38	60S ribosomal protein L21 OS=Cyanophora paradoxa GN=RPL21 PE=2 SV=1
CL10262.Contig1_All	760	111	8.1411	122	9.245	gi|224125494|ref|XP_002329819.1|	395.6	4e-109	predicted protein [Populus trichocarpa] >gi|222870881|gb|EEF08012.1| predicted protein [Populus trichocarpa]	gi|356495197|ref|XM_003516418.1|	135	7e-29	PREDICTED: Glycine max heat stress transcription factor B-2a-like (LOC100789792), mRNA	sp|Q6VBB2|HFA2B_ORYSJ	129	1e-30	Heat stress transcription factor A-2b OS=Oryza sativa subsp. japonica GN=HSFA2B PE=2 SV=1
CL10263.Contig1_All	1778	7217	226.254	7120	230.625	gi|1354517|gb|AAB65822.1|	642.9	0	carbonic anhydrase [Populus tremula x Populus tremuloides]	gi|1354516|gb|U55838.1|PTU55838	2240	0	Populus tremula x Populus tremuloides carbonic anhydrase (CA1b) mRNA, nuclear gene encoding chloroplast protein, complete cds	sp|P27140|CAHC_ARATH	465	4e-131	Carbonic anhydrase, chloroplastic OS=Arabidopsis thaliana GN=CA1 PE=1 SV=2
CL10263.Contig2_All	1489	720	26.9531	678	26.2237	gi|224055529|ref|XP_002298524.1|	651	0	predicted protein [Populus trichocarpa] >gi|222845782|gb|EEE83329.1| predicted protein [Populus trichocarpa]	gi|1354516|gb|U55838.1|PTU55838	1790	0	Populus tremula x Populus tremuloides carbonic anhydrase (CA1b) mRNA, nuclear gene encoding chloroplast protein, complete cds	sp|P27140|CAHC_ARATH	488	4e-138	Carbonic anhydrase, chloroplastic OS=Arabidopsis thaliana GN=CA1 PE=1 SV=2
CL10264.Contig1_All	371	31	4.6576	37	5.7436	gi|255552380|ref|XP_002517234.1|	191.4	3e-48	Histone-lysine N-methyltransferase ATXR6, putative [Ricinus communis] >gi|223543605|gb|EEF45134.1| Histone-lysine N-methyltransferase ATXR6, putative [Ricinus communis]	gi|224131177|ref|XM_002328438.1|	319	1e-84	Populus trichocarpa SET domain protein (SDG928), mRNA	sp|Q9FNE9|ATXR6_ARATH	124	1e-29	Histone-lysine N-methyltransferase ATXR6 OS=Arabidopsis thaliana GN=ATXR6 PE=2 SV=1
CL10264.Contig2_All	257	0	0	0	0	gi|255552380|ref|XP_002517234.1|	110.5	8e-24	Histone-lysine N-methyltransferase ATXR6, putative [Ricinus communis] >gi|223543605|gb|EEF45134.1| Histone-lysine N-methyltransferase ATXR6, putative [Ricinus communis]	gi|224131177|ref|XM_002328438.1|	232	1e-58	Populus trichocarpa SET domain protein (SDG928), mRNA	sp|Q9FNE9|ATXR6_ARATH	72.4	6e-14	Histone-lysine N-methyltransferase ATXR6 OS=Arabidopsis thaliana GN=ATXR6 PE=2 SV=1
CL10265.Contig1_All	211	27	7.1327	30	8.1884	gi|224076532|ref|XP_002304957.1|	115.2	3e-25	predicted protein [Populus trichocarpa] >gi|222847921|gb|EEE85468.1| predicted protein [Populus trichocarpa]	gi|115410559|emb|CT028008.1|	230	4e-58	Poplar cDNA sequences	sp|Q9C5S9|CRK6_ARATH	55.1	9e-09	Cysteine-rich receptor-like protein kinase 6 OS=Arabidopsis thaliana GN=CRK6 PE=1 SV=1
CL10266.Contig1_All	278	10	2.0051	13	2.6931	gi|224112521|ref|XP_002316219.1|	80.1	1e-14	predicted protein [Populus trichocarpa] >gi|222865259|gb|EEF02390.1| predicted protein [Populus trichocarpa]	gi|301299164|gb|GU326353.1|	385	1e-104	Populus euphratica cytochrome P450 monooxygenase (CYP90A1) mRNA, complete cds	--	--	--	--
CL10267.Contig1_All	463	51	6.1399	21	2.6121	--	--	--	--	gi|165723231|gb|AC216673.1|	803	0	Populus trichocarpa clone POP019-C15, complete sequence	--	--	--	--
CL10267.Contig2_All	459	21	2.5502	17	2.133	--	--	--	--	gi|159885770|gb|AC214282.1|	728	0	Populus trichocarpa clone POP018-K04, complete sequence	--	--	--	--
CL10268.Contig1_All	252	29	6.4146	41	9.3701	gi|224085012|ref|XP_002307463.1|	157.9	4e-38	predicted protein [Populus trichocarpa] >gi|222856912|gb|EEE94459.1| predicted protein [Populus trichocarpa]	gi|460240581|gb|GABL01028012.1|	81.8	3e-13	TSA: Camelina sativa comp43055_c0_seq1 transcribed RNA sequence	sp|Q6DBN1|Y4845_ARATH	97.1	2e-21	BTB/POZ domain-containing protein At4g08455 OS=Arabidopsis thaliana GN=At4g08455 PE=1 SV=1
CL10268.Contig2_All	1200	672	31.2147	630	30.2356	gi|224085012|ref|XP_002307463.1|	499.6	4e-140	predicted protein [Populus trichocarpa] >gi|222856912|gb|EEE94459.1| predicted protein [Populus trichocarpa]	gi|359492265|ref|XM_002285852.2|	250	3e-63	PREDICTED: Vitis vinifera BTB/POZ domain-containing protein At4g08455-like (LOC100243658), mRNA	sp|Q6DBN1|Y4845_ARATH	359	2e-99	BTB/POZ domain-containing protein At4g08455 OS=Arabidopsis thaliana GN=At4g08455 PE=1 SV=1
CL10269.Contig1_All	327	14	2.3864	15	2.6418	gi|302849326|ref|XP_002956193.1|	201.8	2e-51	hypothetical protein VOLCADRAFT_110003 [Volvox carteri f. nagariensis] >gi|300258496|gb|EFJ42732.1| hypothetical protein VOLCADRAFT_110003 [Volvox carteri f. nagariensis]	gi|159487670|ref|XM_001701794.1|	337	4e-90	Chlamydomonas reinhardtii vacuolar ATP synthase subunit B (ATPvB) mRNA, complete cds	sp|Q38681|VATB1_ACEAT	198	5e-52	V-type proton ATPase subunit B 1 OS=Acetabularia acetabulum PE=2 SV=1
CL10269.Contig2_All	1109	2562	128.771	2638	136.994	gi|224105123|ref|XP_002313695.1|	507.7	1e-142	predicted protein [Populus trichocarpa] >gi|118484456|gb|ABK94104.1| unknown [Populus trichocarpa] >gi|222850103|gb|EEE87650.1| predicted protein [Populus trichocarpa]	gi|4519263|dbj|AB024277.1|	759	0	Citrus unshiu mRNA for vacuolar H+-ATPase B subunit, complete cds	sp|Q40078|VATB1_HORVU	504	3e-143	V-type proton ATPase subunit B 1 OS=Hordeum vulgare PE=2 SV=1
CL1027.Contig1_All	280	81	16.125	81	16.6604	gi|224141545|ref|XP_002324130.1|	195.7	1e-49	predicted protein [Populus trichocarpa] >gi|222865564|gb|EEF02695.1| predicted protein [Populus trichocarpa]	gi|158508741|gb|AC213015.1|	309	8e-82	Populus trichocarpa clone POP034-G19, complete sequence	sp|Q6NQ79|ARID4_ARATH	116	3e-27	AT-rich interactive domain-containing protein 4 OS=Arabidopsis thaliana GN=ARID4 PE=2 SV=1
CL10270.Contig1_All	559	55	5.4843	26	2.6787	gi|224083779|ref|XP_002307121.1|	60.5	1e-08	predicted protein [Populus trichocarpa] >gi|222856570|gb|EEE94117.1| predicted protein [Populus trichocarpa]	gi|224083778|ref|XM_002307085.1|	1009	0	Populus trichocarpa predicted protein, mRNA	sp|Q0WR59|Y5020_ARATH	216	5e-57	Probable inactive receptor kinase At5g10020 OS=Arabidopsis thaliana GN=At5g10020 PE=1 SV=2
CL10270.Contig2_All	244	15	3.4267	12	2.8324	gi|224096276|ref|XP_002310597.1|	147.1	7e-35	predicted protein [Populus trichocarpa] >gi|222853500|gb|EEE91047.1| predicted protein [Populus trichocarpa]	gi|224096275|ref|XM_002310561.1|	396	1e-108	Populus trichocarpa predicted protein, mRNA	sp|Q0WR59|Y5020_ARATH	86.3	4e-18	Probable inactive receptor kinase At5g10020 OS=Arabidopsis thaliana GN=At5g10020 PE=1 SV=2
CL10271.Contig1_All	2228	919	22.9917	777	20.0847	gi|224082598|ref|XP_002306758.1|	1127.1	0	predicted protein [Populus trichocarpa] >gi|222856207|gb|EEE93754.1| predicted protein [Populus trichocarpa]	gi|470136229|ref|XM_004303851.1|	394	1e-106	PREDICTED: Fragaria vesca subsp. vesca WD repeat-containing protein 26-like (LOC101292523), mRNA	sp|A8IZG4|CIAO1_CHLRE	97.1	4e-20	Probable cytosolic iron-sulfur protein assembly protein CIAO1 homolog OS=Chlamydomonas reinhardtii GN=CHLREDRAFT_130093 PE=3 SV=1
CL10271.Contig2_All	2305	927	22.4171	868	21.6874	gi|224066541|ref|XP_002302127.1|	1123.6	0	predicted protein [Populus trichocarpa] >gi|222843853|gb|EEE81400.1| predicted protein [Populus trichocarpa]	gi|470136229|ref|XM_004303851.1|	440	1e-120	PREDICTED: Fragaria vesca subsp. vesca WD repeat-containing protein 26-like (LOC101292523), mRNA	sp|A8IZG4|CIAO1_CHLRE	99.4	8e-21	Probable cytosolic iron-sulfur protein assembly protein CIAO1 homolog OS=Chlamydomonas reinhardtii GN=CHLREDRAFT_130093 PE=3 SV=1
CL10272.Contig1_All	659	57	4.8213	59	5.1562	gi|224090749|ref|XP_002309071.1|	180.3	2e-44	predicted protein [Populus trichocarpa] >gi|222855047|gb|EEE92594.1| predicted protein [Populus trichocarpa]	gi|160956043|emb|CU225713.1|	720	0	Populus EST from leave	--	--	--	--
CL10272.Contig2_All	660	124	10.4725	157	13.6998	gi|224090749|ref|XP_002309071.1|	180.3	2e-44	predicted protein [Populus trichocarpa] >gi|222855047|gb|EEE92594.1| predicted protein [Populus trichocarpa]	gi|160956043|emb|CU225713.1|	720	0	Populus EST from leave	--	--	--	--
CL10273.Contig1_All	517	69	7.4393	44	4.9014	gi|118483184|gb|ABK93496.1|	195.7	2e-49	unknown [Populus trichocarpa]	gi|356527597|ref|XM_003532347.1|	133	2e-28	PREDICTED: Glycine max probable serine/threonine-protein kinase At1g54610-like (LOC100802680), mRNA	sp|F4I114|Y1960_ARATH	80.9	4e-16	Probable serine/threonine-protein kinase At1g09600 OS=Arabidopsis thaliana GN=At1g09600 PE=2 SV=1
CL10273.Contig2_All	2218	416	10.4545	382	9.9188	gi|118483184|gb|ABK93496.1|	1174.8	0	unknown [Populus trichocarpa]	gi|470125086|ref|XM_004298490.1|	626	1e-176	PREDICTED: Fragaria vesca subsp. vesca uncharacterized LOC101314850 (LOC101314850), mRNA	sp|Q9ZVM9|Y1461_ARATH	657	0	Probable serine/threonine-protein kinase At1g54610 OS=Arabidopsis thaliana GN=At1g54610 PE=1 SV=1
CL10273.Contig3_All	476	48	5.6209	63	7.6224	gi|224122126|ref|XP_002318759.1|	173.7	9e-43	predicted protein [Populus trichocarpa] >gi|222859432|gb|EEE96979.1| predicted protein [Populus trichocarpa]	gi|156627641|gb|AC209224.1|	143	2e-31	Populus trichocarpa chromosome POP064-N07, complete sequence	--	--	--	--
CL10274.Contig1_All	323	14	2.416	8	1.4264	--	--	--	--	--	--	--	--	--	--	--	--
CL10274.Contig2_All	308	5	0.9049	1	0.187	--	--	--	--	--	--	--	--	--	--	--	--
CL10275.Contig1_All	985	44	2.4899	52	3.0404	gi|224073782|ref|XP_002304170.1|	417.5	1e-115	predicted protein [Populus trichocarpa] >gi|222841602|gb|EEE79149.1| predicted protein [Populus trichocarpa]	gi|160959236|emb|CU232835.1|	728	0	Populus EST from severe drought-stressed opposite wood	sp|F6HQ26|RU1C_VITVI	323	9e-89	U1 small nuclear ribonucleoprotein C OS=Vitis vinifera GN=VIT_07s0104g01170 PE=3 SV=1
CL10275.Contig2_All	921	23	1.392	30	1.8759	gi|224073782|ref|XP_002304170.1|	417.5	1e-115	predicted protein [Populus trichocarpa] >gi|222841602|gb|EEE79149.1| predicted protein [Populus trichocarpa]	gi|160960239|emb|CU232904.1|	325	5e-86	Populus EST from severe drought-stressed opposite wood	sp|F6HQ26|RU1C_VITVI	323	9e-89	U1 small nuclear ribonucleoprotein C OS=Vitis vinifera GN=VIT_07s0104g01170 PE=3 SV=1
CL10277.Contig1_All	1541	1289	46.6253	1526	57.031	gi|224098872|ref|XP_002311299.1|	602.8	5e-171	predicted protein [Populus trichocarpa] >gi|222851119|gb|EEE88666.1| predicted protein [Populus trichocarpa]	gi|224098871|ref|XM_002311263.1|	2147	0	Populus trichocarpa predicted protein, mRNA	sp|Q9LMM6|BPS1_ARATH	112	6e-25	Protein BPS1, chloroplastic OS=Arabidopsis thaliana GN=BPS1 PE=2 SV=1
CL10277.Contig2_All	469	340	40.409	310	38.0669	gi|224109056|ref|XP_002315065.1|	289.3	1e-77	predicted protein [Populus trichocarpa] >gi|118486705|gb|ABK95189.1| unknown [Populus trichocarpa] >gi|222864105|gb|EEF01236.1| predicted protein [Populus trichocarpa]	gi|224109055|ref|XM_002315029.1|	821	0	Populus trichocarpa predicted protein, mRNA	sp|Q337C0|U496D_ORYSJ	49.7	8e-07	UPF0496 protein 4 OS=Oryza sativa subsp. japonica GN=Os10g0513300 PE=2 SV=1
CL10278.Contig1_All	602	6	0.5556	1	0.0957	gi|224093670|ref|XP_002309952.1|	149.8	2e-35	predicted protein [Populus trichocarpa] >gi|222852855|gb|EEE90402.1| predicted protein [Populus trichocarpa]	gi|224093669|ref|XM_002309916.1|	440	1e-121	Populus trichocarpa predicted protein, mRNA	sp|Q9LF97|Y3295_ARATH	70.5	7e-13	CBS domain-containing protein CBSCBSPB3 OS=Arabidopsis thaliana GN=CBSCBSPB3 PE=1 SV=1
CL10278.Contig2_All	628	17	1.5089	24	2.201	gi|224093670|ref|XP_002309952.1|	149.8	2e-35	predicted protein [Populus trichocarpa] >gi|222852855|gb|EEE90402.1| predicted protein [Populus trichocarpa]	gi|224093669|ref|XM_002309916.1|	440	1e-121	Populus trichocarpa predicted protein, mRNA	sp|Q9LF97|Y3295_ARATH	70.5	7e-13	CBS domain-containing protein CBSCBSPB3 OS=Arabidopsis thaliana GN=CBSCBSPB3 PE=1 SV=1
CL10279.Contig1_All	426	69	9.0284	28	3.7854	gi|224099123|ref|XP_002311380.1|	73.6	1e-12	predicted protein [Populus trichocarpa] >gi|222851200|gb|EEE88747.1| predicted protein [Populus trichocarpa]	gi|224099122|ref|XM_002311344.1|	200	8e-49	Populus trichocarpa predicted protein, mRNA	--	--	--	--
CL10279.Contig2_All	410	133	18.0817	165	23.1771	gi|224099123|ref|XP_002311380.1|	72	3e-12	predicted protein [Populus trichocarpa] >gi|222851200|gb|EEE88747.1| predicted protein [Populus trichocarpa]	gi|224099122|ref|XM_002311344.1|	157	1e-35	Populus trichocarpa predicted protein, mRNA	--	--	--	--
CL1028.Contig1_All	383	176	25.6145	159	23.9088	gi|224110874|ref|XP_002315666.1|	185.3	2e-46	predicted protein [Populus trichocarpa] >gi|222864706|gb|EEF01837.1| predicted protein [Populus trichocarpa]	gi|160951175|emb|CU223425.1|	573	1e-161	Populus EST from leave	--	--	--	--
CL1028.Contig2_All	556	342	34.2865	374	38.7397	gi|224110874|ref|XP_002315666.1|	186.8	1e-46	predicted protein [Populus trichocarpa] >gi|222864706|gb|EEF01837.1| predicted protein [Populus trichocarpa]	gi|160951175|emb|CU223425.1|	646	0	Populus EST from leave	--	--	--	--
CL1028.Contig3_All	1373	1896	76.9732	1786	74.9152	gi|224102423|ref|XP_002312672.1|	194.5	3e-48	predicted protein [Populus trichocarpa] >gi|118482241|gb|ABK93048.1| unknown [Populus trichocarpa] >gi|118483773|gb|ABK93779.1| unknown [Populus trichocarpa] >gi|222852492|gb|EEE90039.1| predicted protein [Populus trichocarpa]	gi|160949891|emb|CU222928.1|	1124	0	Populus EST from leave	--	--	--	--
CL1028.Contig4_All	1200	581	26.9877	654	31.3874	gi|224102423|ref|XP_002312672.1|	193	8e-48	predicted protein [Populus trichocarpa] >gi|118482241|gb|ABK93048.1| unknown [Populus trichocarpa] >gi|118483773|gb|ABK93779.1| unknown [Populus trichocarpa] >gi|222852492|gb|EEE90039.1| predicted protein [Populus trichocarpa]	gi|160949891|emb|CU222928.1|	833	0	Populus EST from leave	--	--	--	--
CL10280.Contig1_All	851	377	24.6935	424	28.6943	gi|255572513|ref|XP_002527191.1|	163.7	3e-39	Cucumber peeling cupredoxin, putative [Ricinus communis] >gi|223533456|gb|EEF35204.1| Cucumber peeling cupredoxin, putative [Ricinus communis]	gi|160953623|emb|CU224478.1|	821	0	Populus EST from leave	sp|P29602|CPC_CUCSA	101	5e-22	Cucumber peeling cupredoxin OS=Cucumis sativus PE=1 SV=3
CL10280.Contig2_All	824	273	18.4675	250	17.4732	gi|255572513|ref|XP_002527191.1|	156	6e-37	Cucumber peeling cupredoxin, putative [Ricinus communis] >gi|223533456|gb|EEF35204.1| Cucumber peeling cupredoxin, putative [Ricinus communis]	gi|160953623|emb|CU224478.1|	718	0	Populus EST from leave	sp|P29602|CPC_CUCSA	105	2e-23	Cucumber peeling cupredoxin OS=Cucumis sativus PE=1 SV=3
CL10281.Contig1_All	410	74	10.0605	86	12.0802	gi|255554569|ref|XP_002518323.1|	229.6	1e-59	DNA binding protein, putative [Ricinus communis] >gi|223542543|gb|EEF44083.1| DNA binding protein, putative [Ricinus communis]	gi|225429229|ref|XM_002263559.1|	226	1e-56	PREDICTED: Vitis vinifera DNA polymerase V-like (LOC100268096), mRNA	--	--	--	--
CL10281.Contig2_All	373	114	17.036	93	14.3593	gi|255554569|ref|XP_002518323.1|	214.5	3e-55	DNA binding protein, putative [Ricinus communis] >gi|223542543|gb|EEF44083.1| DNA binding protein, putative [Ricinus communis]	gi|225429229|ref|XM_002263559.1|	163	2e-37	PREDICTED: Vitis vinifera DNA polymerase V-like (LOC100268096), mRNA	--	--	--	--
CL10283.Contig1_All	584	203	19.3756	193	19.0328	gi|118483487|gb|ABK93642.1|	186.4	2e-46	unknown [Populus trichocarpa] >gi|118483908|gb|ABK93844.1| unknown [Populus trichocarpa]	gi|224061221|ref|XM_002300341.1|	908	0	Populus trichocarpa predicted protein, mRNA	--	--	--	--
CL10283.Contig2_All	471	26	3.077	29	3.546	gi|118481675|gb|ABK92778.1|	116.7	1e-25	unknown [Populus trichocarpa]	gi|118481674|gb|EF144540.1|	605	1e-170	Populus trichocarpa clone WS01110_E01 unknown mRNA	--	--	--	--
CL10284.Contig1_All	517	82	8.8409	89	9.9142	gi|224061521|ref|XP_002300521.1|	345.5	2e-94	predicted protein [Populus trichocarpa] >gi|222847779|gb|EEE85326.1| predicted protein [Populus trichocarpa]	gi|54306095|gb|AC151955.2|	973	0	Populus trichocarpa clone Pop1-041G20, complete sequence	--	--	--	--
CL10284.Contig2_All	502	65	7.2174	45	5.1626	gi|224115476|ref|XP_002317043.1|	299.3	1e-80	predicted protein [Populus trichocarpa] >gi|222860108|gb|EEE97655.1| predicted protein [Populus trichocarpa]	gi|54306095|gb|AC151955.2|	387	1e-105	Populus trichocarpa clone Pop1-041G20, complete sequence	--	--	--	--
CL10285.Contig1_All	796	135	9.4535	153	11.0697	gi|224109758|ref|XP_002333207.1|	443.4	2e-123	predicted protein [Populus trichocarpa] >gi|222835096|gb|EEE73545.1| predicted protein [Populus trichocarpa]	gi|219818256|gb|FJ149320.1|	93.7	3e-16	Daucus carota subsp. sativus clone BAC C100O02 genomic sequence	--	--	--	--
CL10285.Contig2_All	348	17	2.723	11	1.8204	gi|224109758|ref|XP_002333207.1|	216.9	7e-56	predicted protein [Populus trichocarpa] >gi|222835096|gb|EEE73545.1| predicted protein [Populus trichocarpa]	gi|199580230|gb|AC189537.2|	65.9	3e-08	Brassica rapa subsp. pekinensis clone KBrH003E13, complete sequence	--	--	--	--
CL10286.Contig1_All	346	48	7.7328	14	2.3303	--	--	--	--	gi|224063678|ref|XM_002301225.1|	61.9	4e-07	Populus trichocarpa predicted protein, mRNA	--	--	--	--
CL10286.Contig2_All	299	36	6.7112	17	3.2744	--	--	--	--	--	--	--	--	--	--	--	--
CL10287.Contig1_All	3794	403	5.9208	387	5.8745	gi|224102121|ref|XP_002312555.1|	1940.6	0	argonaute protein group [Populus trichocarpa] >gi|222852375|gb|EEE89922.1| argonaute protein group [Populus trichocarpa]	gi|224107944|ref|XM_002314627.1|	5200	0	Populus trichocarpa argonaute protein group (AGO907), mRNA	sp|Q9XGW1|AGO10_ARATH	1684	0	Protein argonaute 10 OS=Arabidopsis thaliana GN=AGO10 PE=2 SV=1
CL10287.Contig2_All	3418	61	0.9948	59	0.9941	gi|224102121|ref|XP_002312555.1|	1940.6	0	argonaute protein group [Populus trichocarpa] >gi|222852375|gb|EEE89922.1| argonaute protein group [Populus trichocarpa]	gi|224107944|ref|XM_002314627.1|	5009	0	Populus trichocarpa argonaute protein group (AGO907), mRNA	sp|Q9XGW1|AGO10_ARATH	1684	0	Protein argonaute 10 OS=Arabidopsis thaliana GN=AGO10 PE=2 SV=1
CL10287.Contig3_All	439	47	5.9677	19	2.4926	gi|224102121|ref|XP_002312555.1|	287.7	3e-77	argonaute protein group [Populus trichocarpa] >gi|222852375|gb|EEE89922.1| argonaute protein group [Populus trichocarpa]	gi|224102120|ref|XM_002312519.1|	799	0	Populus trichocarpa argonaute protein group (AGO906), mRNA	sp|Q9XGW1|AGO10_ARATH	244	1e-65	Protein argonaute 10 OS=Arabidopsis thaliana GN=AGO10 PE=2 SV=1
CL10288.Contig1_All	874	54	3.4439	66	4.349	gi|224135683|ref|XP_002327279.1|	277.3	2e-73	predicted protein [Populus trichocarpa] >gi|222835649|gb|EEE74084.1| predicted protein [Populus trichocarpa]	gi|359493333|ref|XM_002264434.2|	119	5e-24	PREDICTED: Vitis vinifera RING finger protein 170-like (LOC100247708), mRNA	--	--	--	--
CL10288.Contig2_All	1116	165	8.2412	177	9.1342	gi|224135683|ref|XP_002327279.1|	380.6	2e-104	predicted protein [Populus trichocarpa] >gi|222835649|gb|EEE74084.1| predicted protein [Populus trichocarpa]	gi|359493333|ref|XM_002264434.2|	178	8e-42	PREDICTED: Vitis vinifera RING finger protein 170-like (LOC100247708), mRNA	--	--	--	--
CL10289.Contig1_All	818	36	2.4531	29	2.0418	gi|283135898|gb|ADB11340.1|	283.9	2e-75	zeta class glutathione transferase GSTZ2 [Populus trichocarpa]	gi|283135897|gb|GQ377251.1|	825	0	Populus trichocarpa zeta class glutathione transferase GSTZ2 mRNA, complete cds	sp|P57108|GSTZ_EUPES	220	7e-58	Glutathione S-transferase zeta class OS=Euphorbia esula PE=2 SV=1
CL10289.Contig2_All	1074	460	23.874	442	23.7016	gi|283135898|gb|ADB11340.1|	444.5	1e-123	zeta class glutathione transferase GSTZ2 [Populus trichocarpa]	gi|283135897|gb|GQ377251.1|	1265	0	Populus trichocarpa zeta class glutathione transferase GSTZ2 mRNA, complete cds	sp|P57108|GSTZ_EUPES	349	2e-96	Glutathione S-transferase zeta class OS=Euphorbia esula PE=2 SV=1
CL1029.Contig1_All	285	51	9.9746	58	11.7204	gi|460404000|ref|XP_004247473.1|	63.2	1e-09	PREDICTED: mitochondrial substrate carrier family protein ucpB-like [Solanum lycopersicum]	gi|224128615|ref|XM_002320340.1|	147	7e-33	Populus trichocarpa predicted protein, mRNA	--	--	--	--
CL1029.Contig2_All	294	20	3.7919	27	5.289	gi|460404000|ref|XP_004247473.1|	58.9	2e-08	PREDICTED: mitochondrial substrate carrier family protein ucpB-like [Solanum lycopersicum]	gi|224128615|ref|XM_002320340.1|	147	7e-33	Populus trichocarpa predicted protein, mRNA	--	--	--	--
CL10290.Contig1_All	2014	119	3.2935	180	5.1472	gi|224141755|ref|XP_002324230.1|	595.1	1e-168	predicted protein [Populus trichocarpa] >gi|222865664|gb|EEF02795.1| predicted protein [Populus trichocarpa]	gi|470113275|ref|XM_004292802.1|	460	1e-126	PREDICTED: Fragaria vesca subsp. vesca probable lactoylglutathione lyase, chloroplast-like (LOC101303194), mRNA	sp|Q8W593|LGUC_ARATH	492	3e-139	Probable lactoylglutathione lyase, chloroplast OS=Arabidopsis thaliana GN=At1g67280 PE=2 SV=1
CL10290.Contig2_All	1992	47	1.3152	51	1.4745	gi|224141755|ref|XP_002324230.1|	595.1	1e-168	predicted protein [Populus trichocarpa] >gi|222865664|gb|EEF02795.1| predicted protein [Populus trichocarpa]	gi|470113275|ref|XM_004292802.1|	460	1e-126	PREDICTED: Fragaria vesca subsp. vesca probable lactoylglutathione lyase, chloroplast-like (LOC101303194), mRNA	sp|Q8W593|LGUC_ARATH	492	3e-139	Probable lactoylglutathione lyase, chloroplast OS=Arabidopsis thaliana GN=At1g67280 PE=2 SV=1
CL10291.Contig1_All	303	23	4.2311	20	3.8014	gi|224101677|ref|XP_002312379.1|	198.4	2e-50	leucoanthocyanidin reductase [Populus trichocarpa] >gi|222852199|gb|EEE89746.1| leucoanthocyanidin reductase [Populus trichocarpa]	gi|224101676|ref|XM_002312343.1|	553	1e-155	Populus trichocarpa leucoanthocyanidin reductase (LAR1), mRNA	sp|Q84V83|LAR_DESUN	154	9e-39	Leucoanthocyanidin reductase OS=Desmodium uncinatum GN=LAR PE=1 SV=1
CL10291.Contig2_All	607	64	5.8771	53	5.0286	gi|224108541|ref|XP_002314885.1|	322.4	3e-87	leucocyanidin reductase [Populus trichocarpa] >gi|222863925|gb|EEF01056.1| leucocyanidin reductase [Populus trichocarpa]	gi|224108540|ref|XM_002314849.1|	823	0	Populus trichocarpa leucocyanidin reductase (LAR2), mRNA	sp|Q84V83|LAR_DESUN	209	7e-55	Leucoanthocyanidin reductase OS=Desmodium uncinatum GN=LAR PE=1 SV=1
CL10292.Contig1_All	841	71	4.7058	73	4.999	gi|224067588|ref|XP_002302510.1|	317.8	1e-85	histone ubiquitination proteins group [Populus trichocarpa] >gi|222844236|gb|EEE81783.1| histone ubiquitination proteins group [Populus trichocarpa]	gi|224136329|ref|XM_002326798.1|	846	0	Populus trichocarpa histone ubiquitination proteins group (HUPA901), mRNA	sp|Q8RXD6|BRE1A_ARATH	173	1e-43	E3 ubiquitin-protein ligase BRE1-like 1 OS=Arabidopsis thaliana GN=HUB1 PE=1 SV=1
CL10292.Contig2_All	983	181	10.2635	105	6.1517	gi|224067588|ref|XP_002302510.1|	317.8	1e-85	histone ubiquitination proteins group [Populus trichocarpa] >gi|222844236|gb|EEE81783.1| histone ubiquitination proteins group [Populus trichocarpa]	gi|224136329|ref|XM_002326798.1|	846	0	Populus trichocarpa histone ubiquitination proteins group (HUPA901), mRNA	sp|Q8RXD6|BRE1A_ARATH	173	2e-43	E3 ubiquitin-protein ligase BRE1-like 1 OS=Arabidopsis thaliana GN=HUB1 PE=1 SV=1
CL10293.Contig1_All	434	29	3.7246	14	1.8578	gi|224075972|ref|XP_002304853.1|	243	1e-63	predicted protein [Populus trichocarpa] >gi|222842285|gb|EEE79832.1| predicted protein [Populus trichocarpa]	gi|359478797|ref|XM_002283622.2|	143	2e-31	PREDICTED: Vitis vinifera uncharacterized LOC100263945 (LOC100263945), mRNA	sp|F4I096|MED13_ARATH	120	2e-28	Mediator of RNA polymerase II transcription subunit 13 OS=Arabidopsis thaliana GN=MED13 PE=1 SV=1
CL10293.Contig2_All	200	11	3.0657	2	0.5759	gi|224075972|ref|XP_002304853.1|	134.4	5e-31	predicted protein [Populus trichocarpa] >gi|222842285|gb|EEE79832.1| predicted protein [Populus trichocarpa]	gi|224075971|ref|XM_002304817.1|	381	1e-103	Populus trichocarpa predicted protein, mRNA	--	--	--	--
CL10294.Contig1_All	372	973	145.795	886	137.167	gi|224082442|ref|XP_002306695.1|	208.8	2e-53	predicted protein [Populus trichocarpa] >gi|222856144|gb|EEE93691.1| predicted protein [Populus trichocarpa]	gi|224082441|ref|XM_002306659.1|	363	8e-98	Populus trichocarpa predicted protein, mRNA	sp|Q39117|TGT2_ARATH	73.9	2e-14	Trihelix transcription factor GT-2 OS=Arabidopsis thaliana GN=GT-2 PE=2 SV=1
CL10294.Contig2_All	2021	1574	43.412	1138	32.4291	gi|224066689|ref|XP_002302180.1|	1162.9	0	predicted protein [Populus trichocarpa] >gi|222843906|gb|EEE81453.1| predicted protein [Populus trichocarpa]	gi|160959446|emb|CU227602.1|	763	0	Populus EST from severe drought-stressed leaves	sp|Q39117|TGT2_ARATH	465	4e-131	Trihelix transcription factor GT-2 OS=Arabidopsis thaliana GN=GT-2 PE=2 SV=1
CL10294.Contig3_All	485	23	2.6434	6	0.7125	gi|224082442|ref|XP_002306695.1|	189.9	1e-47	predicted protein [Populus trichocarpa] >gi|222856144|gb|EEE93691.1| predicted protein [Populus trichocarpa]	gi|109639392|gb|DQ778717.1|	61.9	6e-07	Coffea canephora microsatellite ES5 sequence	sp|Q39117|TGT2_ARATH	67.8	3e-12	Trihelix transcription factor GT-2 OS=Arabidopsis thaliana GN=GT-2 PE=2 SV=1
CL10294.Contig4_All	703	370	29.3372	231	18.9241	gi|224066689|ref|XP_002302180.1|	191.8	8e-48	predicted protein [Populus trichocarpa] >gi|222843906|gb|EEE81453.1| predicted protein [Populus trichocarpa]	gi|449446262|ref|XM_004140843.1|	83.8	2e-13	PREDICTED: Cucumis sativus uncharacterized LOC101205810 (LOC101205810), mRNA	sp|Q9C882|GTL1_ARATH	75.5	3e-14	Trihelix transcription factor GTL1 OS=Arabidopsis thaliana GN=GTL1 PE=1 SV=2
CL10294.Contig5_All	536	59	6.1356	40	4.2979	gi|224066689|ref|XP_002302180.1|	190.7	1e-47	predicted protein [Populus trichocarpa] >gi|222843906|gb|EEE81453.1| predicted protein [Populus trichocarpa]	gi|449446262|ref|XM_004140843.1|	75.8	4e-11	PREDICTED: Cucumis sativus uncharacterized LOC101205810 (LOC101205810), mRNA	sp|Q9C882|GTL1_ARATH	74.7	3e-14	Trihelix transcription factor GTL1 OS=Arabidopsis thaliana GN=GTL1 PE=1 SV=2
CL10294.Contig6_All	240	542	125.881	487	116.863	gi|224082442|ref|XP_002306695.1|	163.7	8e-40	predicted protein [Populus trichocarpa] >gi|222856144|gb|EEE93691.1| predicted protein [Populus trichocarpa]	gi|224082441|ref|XM_002306659.1|	432	1e-119	Populus trichocarpa predicted protein, mRNA	--	--	--	--
CL10294.Contig7_All	894	955	59.5439	818	52.6957	gi|224082442|ref|XP_002306695.1|	97.4	3e-19	predicted protein [Populus trichocarpa] >gi|222856144|gb|EEE93691.1| predicted protein [Populus trichocarpa]	gi|160959446|emb|CU227602.1|	1023	0	Populus EST from severe drought-stressed leaves	sp|Q39117|TGT2_ARATH	172	2e-43	Trihelix transcription factor GT-2 OS=Arabidopsis thaliana GN=GT-2 PE=2 SV=1
CL10294.Contig8_All	1731	1793	57.7371	1413	47.0115	gi|224066689|ref|XP_002302180.1|	95.5	3e-18	predicted protein [Populus trichocarpa] >gi|222843906|gb|EEE81453.1| predicted protein [Populus trichocarpa]	gi|160959446|emb|CU227602.1|	724	0	Populus EST from severe drought-stressed leaves	sp|Q39117|TGT2_ARATH	400	2e-111	Trihelix transcription factor GT-2 OS=Arabidopsis thaliana GN=GT-2 PE=2 SV=1
CL10295.Contig1_All	1082	1136	58.5225	962	51.2044	gi|224085888|ref|XP_002307727.1|	650.2	0	tubulin, beta chain [Populus trichocarpa] >gi|222857176|gb|EEE94723.1| tubulin, beta chain [Populus trichocarpa]	gi|224085887|ref|XM_002307691.1|	1764	0	Populus trichocarpa tubulin, beta chain (TUB20), mRNA	sp|P29513|TBB5_ARATH	624	4e-179	Tubulin beta-5 chain OS=Arabidopsis thaliana GN=TUBB5 PE=2 SV=1
CL10295.Contig2_All	1153	225	10.8774	322	16.0837	gi|460240174|gb|AGH08226.1|	635.2	0	beta-tubulin 19 [Salix arbutifolia]	gi|224074920|ref|XM_002304456.1|	1118	0	Populus trichocarpa tubulin, beta chain (TUB10), mRNA	sp|Q40665|TBB3_ORYSJ	624	3e-179	Tubulin beta-3 chain OS=Oryza sativa subsp. japonica GN=TUBB3 PE=2 SV=2
CL10295.Contig3_All	848	1231	80.9159	1253	85.097	gi|224055273|ref|XP_002298455.1|	500.4	1e-140	tubulin, beta chain [Populus trichocarpa] >gi|222845713|gb|EEE83260.1| tubulin, beta chain [Populus trichocarpa]	gi|224055272|ref|XM_002298419.1|	1360	0	Populus trichocarpa tubulin, beta chain (TUB15), mRNA	sp|P93176|TBB_HORVU	494	3e-140	Tubulin beta chain OS=Hordeum vulgare GN=TUBB PE=2 SV=1
CL10295.Contig4_All	747	410	30.5939	460	35.4647	gi|224054578|ref|XP_002298330.1|	398.7	5e-110	tubulin beta chain [Populus trichocarpa] >gi|222845588|gb|EEE83135.1| tubulin beta chain [Populus trichocarpa]	gi|224054577|ref|XM_002298294.1|	1296	0	Populus trichocarpa tubulin beta chain (TUB1), mRNA	sp|P37392|TBB1_LUPAL	387	5e-108	Tubulin beta-1 chain OS=Lupinus albus GN=TUBB1 PE=3 SV=1
CL10295.Contig5_All	414	100	13.4639	75	10.4333	gi|224090883|ref|XP_002309109.1|	285.8	1e-76	tubulin, beta chain [Populus trichocarpa] >gi|222855085|gb|EEE92632.1| tubulin, beta chain [Populus trichocarpa]	gi|224090882|ref|XM_002309073.1|	791	0	Populus trichocarpa tubulin, beta chain (TUB5), mRNA	sp|P93176|TBB_HORVU	283	2e-77	Tubulin beta chain OS=Hordeum vulgare GN=TUBB PE=2 SV=1
CL10295.Contig6_All	333	44	7.3651	34	5.8802	gi|470144897|ref|XP_004308083.1|	231.9	2e-60	PREDICTED: tubulin beta-1 chain-like isoform 1 [Fragaria vesca subsp. vesca] >gi|470144899|ref|XP_004308084.1| PREDICTED: tubulin beta-1 chain-like isoform 2 [Fragaria vesca subsp. vesca]	gi|224090882|ref|XM_002309073.1|	642	0	Populus trichocarpa tubulin, beta chain (TUB5), mRNA	sp|P93176|TBB_HORVU	231	6e-62	Tubulin beta chain OS=Hordeum vulgare GN=TUBB PE=2 SV=1
CL10296.Contig1_All	1440	201	7.7805	164	6.559	gi|224119194|ref|XP_002318010.1|	738.8	0	predicted protein [Populus trichocarpa] >gi|222858683|gb|EEE96230.1| predicted protein [Populus trichocarpa]	gi|359491275|ref|XM_002280487.2|	726	0	PREDICTED: Vitis vinifera serine/threonine-protein kinase AtPK2/AtPK19-like (LOC100244943), mRNA	sp|P42818|KPK1_ARATH	473	2e-133	Serine/threonine-protein kinase AtPK1/AtPK6 OS=Arabidopsis thaliana GN=ATPK1 PE=1 SV=1
CL10296.Contig2_All	894	50	3.1175	48	3.0922	gi|224119194|ref|XP_002318010.1|	463.8	1e-129	predicted protein [Populus trichocarpa] >gi|222858683|gb|EEE96230.1| predicted protein [Populus trichocarpa]	gi|165905715|gb|AC216684.1|	593	1e-166	Populus trichocarpa clone POP030-A02, complete sequence	sp|Q39030|KPK2_ARATH	317	5e-87	Serine/threonine-protein kinase AtPK2/AtPK19 OS=Arabidopsis thaliana GN=ATPK2 PE=1 SV=2
CL10297.Contig1_All	301	47	8.7037	58	11.0974	gi|224062428|ref|XP_002300832.1|	108.6	3e-23	f-box family protein [Populus trichocarpa] >gi|222842558|gb|EEE80105.1| f-box family protein [Populus trichocarpa]	gi|224062427|ref|XM_002300796.1|	529	1e-148	Populus trichocarpa f-box family protein, mRNA	sp|Q9M1W7|SKI30_ARATH	77	2e-15	F-box/kelch-repeat protein SKIP30 OS=Arabidopsis thaliana GN=SKIP30 PE=1 SV=2
CL10297.Contig2_All	540	114	11.7675	84	8.9587	gi|224085497|ref|XP_002307595.1|	158.3	5e-38	f-box family protein [Populus trichocarpa] >gi|222857044|gb|EEE94591.1| f-box family protein [Populus trichocarpa]	gi|224085496|ref|XM_002307559.1|	1007	0	Populus trichocarpa f-box family protein, mRNA	sp|Q9M1W7|SKI30_ARATH	117	4e-27	F-box/kelch-repeat protein SKIP30 OS=Arabidopsis thaliana GN=SKIP30 PE=1 SV=2
CL10298.Contig1_All	573	148	14.3972	165	16.584	gi|118484613|gb|ABK94180.1|	117.5	1e-25	unknown [Populus trichocarpa]	gi|160956660|emb|CU231171.1|	523	1e-146	Populus EST from mild drought-stressed leaves	--	--	--	--
CL10298.Contig2_All	506	441	48.5802	558	63.5101	gi|224105271|ref|XP_002313750.1|	110.2	1e-23	predicted protein [Populus trichocarpa] >gi|222850158|gb|EEE87705.1| predicted protein [Populus trichocarpa]	gi|160956660|emb|CU231171.1|	355	3e-95	Populus EST from mild drought-stressed leaves	--	--	--	--
CL10299.Contig1_All	1519	681	24.9897	775	29.3835	gi|224131368|ref|XP_002321067.1|	855.9	0	predicted protein [Populus trichocarpa] >gi|222861840|gb|EEE99382.1| predicted protein [Populus trichocarpa]	gi|356498652|ref|XM_003518116.1|	1003	0	PREDICTED: Glycine max eukaryotic peptide chain release factor subunit 1-3-like (LOC100786788), mRNA	sp|P35614|ERF1Z_ARATH	807	0	Eukaryotic peptide chain release factor subunit 1-3 OS=Arabidopsis thaliana GN=ERF1-3 PE=2 SV=1
CL10299.Contig2_All	543	20	2.0531	31	3.2879	--	--	--	--	gi|160961123|emb|CU233158.1|	246	2e-62	Populus EST from severe drought-stressed opposite wood	--	--	--	--
CL10299.Contig3_All	1861	909	27.2263	700	21.6626	gi|224053613|ref|XP_002297898.1|	861.7	0	predicted protein [Populus trichocarpa] >gi|222845156|gb|EEE82703.1| predicted protein [Populus trichocarpa]	gi|470121905|ref|XM_004296949.1|	1009	0	PREDICTED: Fragaria vesca subsp. vesca eukaryotic peptide chain release factor subunit 1-3-like (LOC101307979), mRNA	sp|P35614|ERF1Z_ARATH	795	0	Eukaryotic peptide chain release factor subunit 1-3 OS=Arabidopsis thaliana GN=ERF1-3 PE=2 SV=1
CL10299.Contig4_All	1537	1517	55.0153	1363	51.0718	gi|224075409|ref|XP_002304621.1|	776.5	0	predicted protein [Populus trichocarpa] >gi|222842053|gb|EEE79600.1| predicted protein [Populus trichocarpa]	gi|359493089|ref|XM_002271421.2|	904	0	PREDICTED: Vitis vinifera eukaryotic peptide chain release factor subunit 1-3-like (LOC100267567), mRNA	sp|P35614|ERF1Z_ARATH	736	0	Eukaryotic peptide chain release factor subunit 1-3 OS=Arabidopsis thaliana GN=ERF1-3 PE=2 SV=1
CL103.Contig1_All	1158	21	1.0108	11	0.5471	gi|462406649|gb|EMJ12113.1|	551.2	1e-155	hypothetical protein PRUPE_ppa000404mg [Prunus persica]	gi|359491065|ref|XM_002279890.2|	361	1e-96	PREDICTED: Vitis vinifera uncharacterized LOC100266414 (LOC100266414), mRNA	--	--	--	--
CL103.Contig2_All	1260	11	0.4866	8	0.3657	gi|255540273|ref|XP_002511201.1|	613.6	2e-174	ATP binding protein, putative [Ricinus communis] >gi|223550316|gb|EEF51803.1| ATP binding protein, putative [Ricinus communis]	gi|359491065|ref|XM_002279890.2|	492	1e-136	PREDICTED: Vitis vinifera uncharacterized LOC100266414 (LOC100266414), mRNA	--	--	--	--
CL103.Contig3_All	3692	823	12.4254	708	11.0441	gi|255540273|ref|XP_002511201.1|	1876.7	0	ATP binding protein, putative [Ricinus communis] >gi|223550316|gb|EEF51803.1| ATP binding protein, putative [Ricinus communis]	gi|359491065|ref|XM_002279890.2|	1388	0	PREDICTED: Vitis vinifera uncharacterized LOC100266414 (LOC100266414), mRNA	sp|Q9SEX2|KTNA1_ARATH	216	6e-56	Katanin p60 ATPase-containing subunit A1 OS=Arabidopsis thaliana GN=AAA1 PE=1 SV=1
CL103.Contig4_All	4145	1257	16.9037	1149	15.9645	gi|255540273|ref|XP_002511201.1|	1950.2	0	ATP binding protein, putative [Ricinus communis] >gi|223550316|gb|EEF51803.1| ATP binding protein, putative [Ricinus communis]	gi|470123010|ref|XM_004297482.1|	1398	0	PREDICTED: Fragaria vesca subsp. vesca uncharacterized LOC101298792 (LOC101298792), mRNA	sp|Q9SEX2|KTNA1_ARATH	217	4e-56	Katanin p60 ATPase-containing subunit A1 OS=Arabidopsis thaliana GN=AAA1 PE=1 SV=1
CL1030.Contig1_All	482	38	4.3945	25	2.9871	--	--	--	--	--	--	--	--	--	--	--	--
CL1030.Contig2_All	319	6	1.0484	5	0.9027	--	--	--	--	--	--	--	--	--	--	--	--
CL10300.Contig1_All	826	17	1.1472	12	0.8367	gi|428175288|gb|EKX44179.1|	53.9	3e-06	hypothetical protein GUITHDRAFT_140012 [Guillardia theta CCMP2712]	--	--	--	--	sp|Q9LS95|PERK6_ARATH	49.3	3e-06	Putative proline-rich receptor-like protein kinase PERK6 OS=Arabidopsis thaliana GN=PERK6 PE=2 SV=2
CL10300.Contig2_All	1795	219	6.8007	133	4.2672	gi|462395059|gb|EMJ00858.1|	77	1e-12	hypothetical protein PRUPE_ppa001331mg [Prunus persica]	--	--	--	--	sp|P93025|PHOT2_ARATH	71.2	2e-12	Phototropin-2 OS=Arabidopsis thaliana GN=PHOT2 PE=1 SV=2
CL10301.Contig1_All	638	15	1.3105	20	1.8054	gi|224107935|ref|XP_002314660.1|	334.3	8e-91	beta-ketoacyl-coa synthase family protein [Populus trichocarpa] >gi|222863700|gb|EEF00831.1| beta-ketoacyl-coa synthase family protein [Populus trichocarpa]	gi|168239881|gb|AC217632.1|	954	0	Populus trichocarpa clone POP013-F03, complete sequence	sp|O48780|KCS11_ARATH	301	2e-82	3-ketoacyl-CoA synthase 11 OS=Arabidopsis thaliana GN=KCS11 PE=1 SV=1
CL10301.Contig2_All	648	12	1.0322	14	1.2443	gi|224107935|ref|XP_002314660.1|	334.3	8e-91	beta-ketoacyl-coa synthase family protein [Populus trichocarpa] >gi|222863700|gb|EEF00831.1| beta-ketoacyl-coa synthase family protein [Populus trichocarpa]	gi|168239881|gb|AC217632.1|	1037	0	Populus trichocarpa clone POP013-F03, complete sequence	sp|O48780|KCS11_ARATH	301	2e-82	3-ketoacyl-CoA synthase 11 OS=Arabidopsis thaliana GN=KCS11 PE=1 SV=1
CL10302.Contig1_All	1771	2568	80.8254	2302	74.8593	gi|224141201|ref|XP_002323963.1|	707.6	0	predicted protein [Populus trichocarpa] >gi|222866965|gb|EEF04096.1| predicted protein [Populus trichocarpa]	gi|160959381|emb|CU227537.1|	579	1e-162	Populus EST from severe drought-stressed leaves	sp|D4N501|DIOX2_PAPSO	206	5e-53	Probable 2-oxoglutarate/Fe(II)-dependent dioxygenase OS=Papaver somniferum GN=DIOX2 PE=2 SV=1
CL10302.Contig2_All	1726	3176	102.568	2568	85.6867	gi|224141201|ref|XP_002323963.1|	714.1	0	predicted protein [Populus trichocarpa] >gi|222866965|gb|EEF04096.1| predicted protein [Populus trichocarpa]	gi|160956915|emb|CU231425.1|	553	1e-154	Populus EST from mild drought-stressed leaves	sp|D4N501|DIOX2_PAPSO	209	4e-54	Probable 2-oxoglutarate/Fe(II)-dependent dioxygenase OS=Papaver somniferum GN=DIOX2 PE=2 SV=1
CL10302.Contig3_All	444	87	10.9221	96	12.4522	--	--	--	--	gi|160959381|emb|CU227537.1|	75.8	3e-11	Populus EST from severe drought-stressed leaves	--	--	--	--
CL10303.Contig1_All	222	19	4.7706	18	4.6696	gi|224063160|ref|XP_002301020.1|	151	5e-36	predicted protein [Populus trichocarpa] >gi|222842746|gb|EEE80293.1| predicted protein [Populus trichocarpa]	gi|357461710|ref|XM_003601089.1|	69.9	1e-09	Medicago truncatula Auxin response factor (MTR_3g073420) mRNA, complete cds	sp|Q84WU6|ARFQ_ARATH	70.9	2e-13	Auxin response factor 17 OS=Arabidopsis thaliana GN=ARF17 PE=2 SV=1
CL10303.Contig2_All	781	89	6.352	77	5.678	gi|255545568|ref|XP_002513844.1|	403.3	2e-111	Auxin response factor, putative [Ricinus communis] >gi|223546930|gb|EEF48427.1| Auxin response factor, putative [Ricinus communis]	gi|470131819|ref|XM_004301740.1|	121	1e-24	PREDICTED: Fragaria vesca subsp. vesca auxin response factor 17-like (LOC101298328), mRNA	sp|Q84WU6|ARFQ_ARATH	293	1e-79	Auxin response factor 17 OS=Arabidopsis thaliana GN=ARF17 PE=2 SV=1
CL10304.Contig1_All	1720	481	15.5879	406	13.5943	gi|118487583|gb|ABK95617.1|	1046.2	0	unknown [Populus trichocarpa]	gi|359484337|ref|XM_002280383.2|	821	0	PREDICTED: Vitis vinifera ceramide glucosyltransferase-like (LOC100264719), mRNA	--	--	--	--
CL10305.Contig1_All	320	44	7.6643	30	5.3992	gi|224091104|ref|XP_002309180.1|	167.2	7e-41	predicted protein [Populus trichocarpa] >gi|222855156|gb|EEE92703.1| predicted protein [Populus trichocarpa]	gi|356506652|ref|XM_003522043.1|	135	3e-29	PREDICTED: Glycine max uncharacterized protein LOC100803805 (LOC100803805), mRNA	--	--	--	--
CL10305.Contig2_All	223	22	5.4991	47	12.1381	gi|224139338|ref|XP_002323063.1|	108.6	3e-23	predicted protein [Populus trichocarpa] >gi|222867693|gb|EEF04824.1| predicted protein [Populus trichocarpa]	gi|470138689|ref|XM_004305040.1|	149	1e-33	PREDICTED: Fragaria vesca subsp. vesca uncharacterized LOC101300552 (LOC101300552), mRNA	--	--	--	--
CL10306.Contig1_All	976	44	2.5129	38	2.2423	gi|224066923|ref|XP_002302281.1|	549.7	2e-155	predicted protein [Populus trichocarpa] >gi|222844007|gb|EEE81554.1| predicted protein [Populus trichocarpa]	gi|359492837|ref|XM_002284183.2|	426	1e-116	PREDICTED: Vitis vinifera random slug protein 5-like (LOC100250501), mRNA	sp|Q94C59|PATL4_ARATH	62.4	4e-10	Patellin-4 OS=Arabidopsis thaliana GN=PATL4 PE=1 SV=2
CL10306.Contig2_All	1030	25	1.3529	21	1.1742	gi|224066923|ref|XP_002302281.1|	549.7	3e-155	predicted protein [Populus trichocarpa] >gi|222844007|gb|EEE81554.1| predicted protein [Populus trichocarpa]	gi|359492837|ref|XM_002284183.2|	434	1e-119	PREDICTED: Vitis vinifera random slug protein 5-like (LOC100250501), mRNA	sp|Q94C59|PATL4_ARATH	62.4	4e-10	Patellin-4 OS=Arabidopsis thaliana GN=PATL4 PE=1 SV=2
CL10306.Contig3_All	1044	44	2.3492	28	1.5446	gi|224066923|ref|XP_002302281.1|	549.7	3e-155	predicted protein [Populus trichocarpa] >gi|222844007|gb|EEE81554.1| predicted protein [Populus trichocarpa]	gi|359492837|ref|XM_002284183.2|	434	1e-119	PREDICTED: Vitis vinifera random slug protein 5-like (LOC100250501), mRNA	sp|Q94C59|PATL4_ARATH	62.4	4e-10	Patellin-4 OS=Arabidopsis thaliana GN=PATL4 PE=1 SV=2
CL10307.Contig1_All	662	211	17.7663	272	23.663	gi|118483699|gb|ABK93743.1|	156	4e-37	unknown [Populus trichocarpa]	gi|118483698|gb|EF145599.1|	329	2e-87	Populus trichocarpa clone WS01126_M02 unknown mRNA	sp|Q9SK28|FH18_ARATH	49.7	1e-06	Formin-like protein 18 OS=Arabidopsis thaliana GN=FH18 PE=2 SV=2
CL10307.Contig2_All	292	0	0	0	0	--	--	--	--	--	--	--	--	--	--	--	--
CL10308.Contig1_All	1857	220	6.6036	192	5.9545	gi|224118568|ref|XP_002331394.1|	793.5	0	predicted protein [Populus trichocarpa] >gi|222873608|gb|EEF10739.1| predicted protein [Populus trichocarpa]	gi|160953086|emb|CU224339.1|	1065	0	Populus EST from leave	sp|Q0DA50|C3H45_ORYSJ	65.1	1e-10	Zinc finger CCCH domain-containing protein 45 OS=Oryza sativa subsp. japonica GN=Os06g0677700 PE=2 SV=1
CL10308.Contig2_All	1867	266	7.9416	245	7.5575	gi|224118568|ref|XP_002331394.1|	831.2	0	predicted protein [Populus trichocarpa] >gi|222873608|gb|EEF10739.1| predicted protein [Populus trichocarpa]	gi|160953086|emb|CU224339.1|	690	0	Populus EST from leave	sp|A9LNK9|CPSF_ARATH	60.8	3e-09	Cleavage and polyadenylation specificity factor CPSF30 OS=Arabidopsis thaliana GN=CPSF30 PE=1 SV=1
CL10309.Contig1_All	758	46	3.3827	68	5.1665	gi|224062525|ref|XP_002300847.1|	469.5	2e-131	predicted protein [Populus trichocarpa] >gi|222842573|gb|EEE80120.1| predicted protein [Populus trichocarpa]	gi|359479794|ref|XM_002275087.2|	218	6e-54	PREDICTED: Vitis vinifera uncharacterized LOC100261455 (LOC100261455), mRNA	--	--	--	--
CL1031.Contig1_All	2697	243	5.0222	168	3.5875	gi|224069798|ref|XP_002303042.1|	1415.2	0	hypothetical protein POPTRDRAFT_756271 [Populus trichocarpa] >gi|222844768|gb|EEE82315.1| hypothetical protein POPTRDRAFT_756271 [Populus trichocarpa]	gi|359480141|ref|XM_002269160.2|	129	2e-26	PREDICTED: Vitis vinifera uncharacterized LOC100267035 (LOC100267035), mRNA	sp|F4I171|MD15A_ARATH	92.8	9e-19	Mediator of RNA polymerase II transcription subunit 15a OS=Arabidopsis thaliana GN=MED15A PE=1 SV=1
CL1031.Contig2_All	1406	49	1.9426	25	1.024	gi|224132204|ref|XP_002321281.1|	704.5	0	predicted protein [Populus trichocarpa] >gi|222862054|gb|EEE99596.1| predicted protein [Populus trichocarpa]	gi|359480141|ref|XM_002269160.2|	117	3e-23	PREDICTED: Vitis vinifera uncharacterized LOC100267035 (LOC100267035), mRNA	sp|F4I171|MD15A_ARATH	63.2	4e-10	Mediator of RNA polymerase II transcription subunit 15a OS=Arabidopsis thaliana GN=MED15A PE=1 SV=1
CL1031.Contig3_All	1623	63	2.1637	35	1.242	gi|224132204|ref|XP_002321281.1|	704.5	0	predicted protein [Populus trichocarpa] >gi|222862054|gb|EEE99596.1| predicted protein [Populus trichocarpa]	gi|359480141|ref|XM_002269160.2|	117	4e-23	PREDICTED: Vitis vinifera uncharacterized LOC100267035 (LOC100267035), mRNA	sp|F4I171|MD15A_ARATH	63.2	4e-10	Mediator of RNA polymerase II transcription subunit 15a OS=Arabidopsis thaliana GN=MED15A PE=1 SV=1
CL1031.Contig4_All	1415	15	0.5909	4	0.1628	gi|224069798|ref|XP_002303042.1|	831.2	0	hypothetical protein POPTRDRAFT_756271 [Populus trichocarpa] >gi|222844768|gb|EEE82315.1| hypothetical protein POPTRDRAFT_756271 [Populus trichocarpa]	gi|359480141|ref|XM_002269160.2|	117	3e-23	PREDICTED: Vitis vinifera uncharacterized LOC100267035 (LOC100267035), mRNA	sp|F4I171|MD15A_ARATH	64.7	1e-10	Mediator of RNA polymerase II transcription subunit 15a OS=Arabidopsis thaliana GN=MED15A PE=1 SV=1
CL1031.Contig5_All	622	244	21.8661	217	20.0922	gi|224069798|ref|XP_002303042.1|	52.4	6e-06	hypothetical protein POPTRDRAFT_756271 [Populus trichocarpa] >gi|222844768|gb|EEE82315.1| hypothetical protein POPTRDRAFT_756271 [Populus trichocarpa]	gi|470107747|ref|XM_004290156.1|	61.9	7e-07	PREDICTED: Fragaria vesca subsp. vesca uncharacterized LOC101292950 (LOC101292950), mRNA	--	--	--	--
CL1031.Contig6_All	1327	167	7.0148	134	5.8156	gi|224132204|ref|XP_002321281.1|	758.4	0	predicted protein [Populus trichocarpa] >gi|222862054|gb|EEE99596.1| predicted protein [Populus trichocarpa]	gi|359480141|ref|XM_002269160.2|	125	1e-25	PREDICTED: Vitis vinifera uncharacterized LOC100267035 (LOC100267035), mRNA	sp|F4I171|MD15A_ARATH	66.6	3e-11	Mediator of RNA polymerase II transcription subunit 15a OS=Arabidopsis thaliana GN=MED15A PE=1 SV=1
CL10310.Contig1_All	1188	134	6.2872	102	4.9447	gi|224112166|ref|XP_002316104.1|	629.4	3e-179	predicted protein [Populus trichocarpa] >gi|222865144|gb|EEF02275.1| predicted protein [Populus trichocarpa]	gi|225424978|ref|XM_002266304.1|	398	1e-108	PREDICTED: Vitis vinifera uncharacterized LOC100265119 (LOC100265119), mRNA	--	--	--	--
CL10310.Contig2_All	293	13	2.4731	3	0.5897	gi|224098942|ref|XP_002311326.1|	189.5	1e-47	predicted protein [Populus trichocarpa] >gi|222851146|gb|EEE88693.1| predicted protein [Populus trichocarpa]	gi|449518156|ref|XM_004166062.1|	113	1e-22	PREDICTED: Cucumis sativus uncharacterized LOC101217654 (LOC101217654), partial mRNA	--	--	--	--
CL10310.Contig3_All	239	23	5.3642	13	3.1326	--	--	--	--	gi|224098941|ref|XM_002311290.1|	365	1e-98	Populus trichocarpa predicted protein, mRNA	--	--	--	--
CL10311.Contig1_All	349	6	0.9583	4	0.6601	gi|224124824|ref|XP_002319431.1|	155.2	2e-37	predicted protein [Populus trichocarpa] >gi|222857807|gb|EEE95354.1| predicted protein [Populus trichocarpa]	gi|380309037|gb|JQ429184.1|	58	6e-06	Pinus koraiensis clone NS26 microsatellite sequence	--	--	--	--
CL10311.Contig2_All	432	16	2.0645	10	1.3331	gi|224124824|ref|XP_002319431.1|	53.9	1e-54	predicted protein [Populus trichocarpa] >gi|222857807|gb|EEE95354.1| predicted protein [Populus trichocarpa]	gi|380309037|gb|JQ429184.1|	60	2e-06	Pinus koraiensis clone NS26 microsatellite sequence	--	--	--	--
CL10312.Contig1_All	745	20	1.4964	17	1.3142	gi|224122540|ref|XP_002318862.1|	169.1	6e-41	predicted protein [Populus trichocarpa] >gi|222859535|gb|EEE97082.1| predicted protein [Populus trichocarpa]	gi|359490268|ref|XM_002269916.2|	137	2e-29	PREDICTED: Vitis vinifera mitochondrial metalloendopeptidase OMA1-like (LOC100253134), mRNA	--	--	--	--
CL10312.Contig2_All	1398	291	11.6027	227	9.3514	gi|224122540|ref|XP_002318862.1|	734.6	0	predicted protein [Populus trichocarpa] >gi|222859535|gb|EEE97082.1| predicted protein [Populus trichocarpa]	gi|359490268|ref|XM_002269916.2|	234	2e-58	PREDICTED: Vitis vinifera mitochondrial metalloendopeptidase OMA1-like (LOC100253134), mRNA	--	--	--	--
CL10313.Contig1_All	594	1212	113.733	1451	140.683	gi|224116642|ref|XP_002317354.1|	146.4	2e-34	predicted protein [Populus trichocarpa] >gi|118481681|gb|ABK92781.1| unknown [Populus trichocarpa] >gi|222860419|gb|EEE97966.1| predicted protein [Populus trichocarpa]	gi|167599638|gb|EU295480.1|	176	2e-41	Hevea brasiliensis ATP synthase subunit H protein mRNA, complete cds	--	--	--	--
CL10313.Contig2_All	581	354	33.9624	541	53.6266	gi|224061069|ref|XP_002300343.1|	145.6	4e-34	predicted protein [Populus trichocarpa] >gi|118482559|gb|ABK93200.1| unknown [Populus trichocarpa] >gi|118489389|gb|ABK96499.1| unknown [Populus trichocarpa x Populus deltoides] >gi|222847601|gb|EEE85148.1| predicted protein [Populus trichocarpa]	gi|167599638|gb|EU295480.1|	184	7e-44	Hevea brasiliensis ATP synthase subunit H protein mRNA, complete cds	--	--	--	--
CL10314.Contig1_All	2281	262	6.4025	202	5.1002	gi|255546811|ref|XP_002514464.1|	954.9	0	conserved hypothetical protein [Ricinus communis] >gi|223546460|gb|EEF47960.1| conserved hypothetical protein [Ricinus communis]	gi|470127680|ref|XM_004299746.1|	305	1e-79	PREDICTED: Fragaria vesca subsp. vesca uncharacterized LOC101315343 (LOC101315343), mRNA	--	--	--	--
CL10314.Contig2_All	853	8	0.5228	11	0.7427	gi|255546811|ref|XP_002514464.1|	170.2	5e-109	conserved hypothetical protein [Ricinus communis] >gi|223546460|gb|EEF47960.1| conserved hypothetical protein [Ricinus communis]	gi|470127680|ref|XM_004299746.1|	168	6e-39	PREDICTED: Fragaria vesca subsp. vesca uncharacterized LOC101315343 (LOC101315343), mRNA	--	--	--	--
CL10315.Contig1_All	1351	368	15.1832	355	15.1332	gi|224055749|ref|XP_002298634.1|	137.9	4e-31	predicted protein [Populus trichocarpa] >gi|224055751|ref|XP_002298635.1| predicted protein [Populus trichocarpa] >gi|222845892|gb|EEE83439.1| predicted protein [Populus trichocarpa] >gi|222845893|gb|EEE83440.1| predicted protein [Populus trichocarpa]	gi|158341705|gb|AC212851.1|	2224	0	Populus trichocarpa clone POP079-C10, complete sequence	--	--	--	--
CL10316.Contig1_All	897	23	1.4292	32	2.0545	gi|40714509|dbj|BAD06918.1|	320.1	3e-86	light-harvesting chlorophyll-a/b protein of photosystem I [Chlamydomonas reinhardtii]	gi|87313212|gb|DQ370091.1|	168	6e-39	Chlamydomonas incerta light-harvesting chlorophyll-a/b binding protein Lhca1 mRNA, partial cds	sp|P27521|CA4_ARATH	204	7e-53	Chlorophyll a-b binding protein 4, chloroplastic OS=Arabidopsis thaliana GN=LHCA4 PE=1 SV=1
CL10316.Contig2_All	940	165	9.7843	114	6.9845	gi|40714509|dbj|BAD06918.1|	320.1	3e-86	light-harvesting chlorophyll-a/b protein of photosystem I [Chlamydomonas reinhardtii]	gi|87313212|gb|DQ370091.1|	168	7e-39	Chlamydomonas incerta light-harvesting chlorophyll-a/b binding protein Lhca1 mRNA, partial cds	sp|P27521|CA4_ARATH	204	8e-53	Chlorophyll a-b binding protein 4, chloroplastic OS=Arabidopsis thaliana GN=LHCA4 PE=1 SV=1
CL10316.Contig3_All	210	22	5.8395	14	3.8394	gi|40714509|dbj|BAD06918.1|	128.6	2e-29	light-harvesting chlorophyll-a/b protein of photosystem I [Chlamydomonas reinhardtii]	gi|87313212|gb|DQ370091.1|	170	3e-40	Chlamydomonas incerta light-harvesting chlorophyll-a/b binding protein Lhca1 mRNA, partial cds	sp|P27521|CA4_ARATH	75.5	7e-15	Chlorophyll a-b binding protein 4, chloroplastic OS=Arabidopsis thaliana GN=LHCA4 PE=1 SV=1
CL10317.Contig1_All	225	15	3.716	10	2.5596	--	--	--	--	gi|224112394|ref|XM_002332746.1|	61.9	2e-07	Populus trichocarpa nbs-lrr resistance protein, mRNA	--	--	--	--
CL10318.Contig1_All	351	47	7.4638	39	6.3991	--	--	--	--	gi|160949625|emb|CU233739.1|	587	1e-165	Populus EST from severe drought-stressed opposite wood	--	--	--	--
CL10319.Contig1_All	248	5	1.1238	16	3.7156	gi|224112112|ref|XP_002316087.1|	159.5	1e-38	predicted protein [Populus trichocarpa] >gi|222865127|gb|EEF02258.1| predicted protein [Populus trichocarpa]	gi|359472813|ref|XM_003631149.1|	91.7	3e-16	PREDICTED: Vitis vinifera uncharacterized LOC100854391 (LOC100854391), mRNA	--	--	--	--
CL10319.Contig2_All	211	16	4.2268	17	4.6401	gi|224112112|ref|XP_002316087.1|	154.8	3e-37	predicted protein [Populus trichocarpa] >gi|222865127|gb|EEF02258.1| predicted protein [Populus trichocarpa]	gi|470122413|ref|XM_004297188.1|	95.6	2e-17	PREDICTED: Fragaria vesca subsp. vesca uncharacterized LOC101310691 (LOC101310691), mRNA	--	--	--	--
CL1032.Contig1_All	1901	52	1.5247	45	1.3633	gi|224131858|ref|XP_002321196.1|	991.1	0	predicted protein [Populus trichocarpa] >gi|222861969|gb|EEE99511.1| predicted protein [Populus trichocarpa]	gi|225447548|ref|XM_002268851.1|	1241	0	PREDICTED: Vitis vinifera glucose-6-phosphate 1-dehydrogenase, chloroplastic-like (LOC100264918), mRNA	sp|Q43727|G6PD1_ARATH	882	0	Glucose-6-phosphate 1-dehydrogenase 1, chloroplastic OS=Arabidopsis thaliana GN=APG1 PE=2 SV=2
CL1032.Contig2_All	1979	46	1.2956	74	2.1535	gi|224131858|ref|XP_002321196.1|	991.1	0	predicted protein [Populus trichocarpa] >gi|222861969|gb|EEE99511.1| predicted protein [Populus trichocarpa]	gi|225447548|ref|XM_002268851.1|	1241	0	PREDICTED: Vitis vinifera glucose-6-phosphate 1-dehydrogenase, chloroplastic-like (LOC100264918), mRNA	sp|Q43727|G6PD1_ARATH	882	0	Glucose-6-phosphate 1-dehydrogenase 1, chloroplastic OS=Arabidopsis thaliana GN=APG1 PE=2 SV=2
CL1032.Contig3_All	2212	218	5.4934	204	5.3113	gi|224053521|ref|XP_002297854.1|	1187.2	0	predicted protein [Populus trichocarpa] >gi|222845112|gb|EEE82659.1| predicted protein [Populus trichocarpa]	gi|359473785|ref|XM_002266894.2|	1314	0	PREDICTED: Vitis vinifera glucose-6-phosphate 1-dehydrogenase, chloroplastic-like (LOC100267681), mRNA	sp|Q43793|G6PDC_TOBAC	967	0	Glucose-6-phosphate 1-dehydrogenase, chloroplastic OS=Nicotiana tabacum PE=2 SV=1
CL1032.Contig4_All	1110	110	5.5238	69	3.58	gi|224131858|ref|XP_002321196.1|	693	0	predicted protein [Populus trichocarpa] >gi|222861969|gb|EEE99511.1| predicted protein [Populus trichocarpa]	gi|225447548|ref|XM_002268851.1|	807	0	PREDICTED: Vitis vinifera glucose-6-phosphate 1-dehydrogenase, chloroplastic-like (LOC100264918), mRNA	sp|Q43727|G6PD1_ARATH	619	1e-177	Glucose-6-phosphate 1-dehydrogenase 1, chloroplastic OS=Arabidopsis thaliana GN=APG1 PE=2 SV=2
CL1032.Contig5_All	2233	185	4.618	228	5.8804	gi|224053521|ref|XP_002297854.1|	1186	0	predicted protein [Populus trichocarpa] >gi|222845112|gb|EEE82659.1| predicted protein [Populus trichocarpa]	gi|359473785|ref|XM_002266894.2|	1298	0	PREDICTED: Vitis vinifera glucose-6-phosphate 1-dehydrogenase, chloroplastic-like (LOC100267681), mRNA	sp|Q43793|G6PDC_TOBAC	966	0	Glucose-6-phosphate 1-dehydrogenase, chloroplastic OS=Nicotiana tabacum PE=2 SV=1
CL10320.Contig1_All	1135	134	6.5808	117	5.9368	gi|224118788|ref|XP_002317906.1|	68.9	1e-10	predicted protein [Populus trichocarpa] >gi|222858579|gb|EEE96126.1| predicted protein [Populus trichocarpa]	gi|470129195|ref|XM_004300463.1|	281	8e-73	PREDICTED: Fragaria vesca subsp. vesca uncharacterized LOC101292707 (LOC101292707), mRNA	--	--	--	--
CL10320.Contig2_All	753	4	0.2961	11	0.8413	gi|224118788|ref|XP_002317906.1|	68.6	1e-10	predicted protein [Populus trichocarpa] >gi|222858579|gb|EEE96126.1| predicted protein [Populus trichocarpa]	gi|470129195|ref|XM_004300463.1|	281	5e-73	PREDICTED: Fragaria vesca subsp. vesca uncharacterized LOC101292707 (LOC101292707), mRNA	--	--	--	--
CL10321.Contig1_All	1625	509	17.4597	322	11.412	gi|224091014|ref|XP_002309146.1|	968	0	predicted protein [Populus trichocarpa] >gi|222855122|gb|EEE92669.1| predicted protein [Populus trichocarpa]	gi|156900673|gb|EU106890.1|	890	0	Jatropha curcas chloroplast omega-3 fatty acid desaturase mRNA, complete cds; nuclear gene for chloroplast product	sp|P48620|FAD3C_SESIN	759	0	Omega-3 fatty acid desaturase, chloroplastic OS=Sesamum indicum GN=FAD7 PE=2 SV=1
CL10322.Contig1_All	1306	186	7.9386	133	5.865	gi|224128308|ref|XP_002329131.1|	572	7e-162	predicted protein [Populus trichocarpa] >gi|222869800|gb|EEF06931.1| predicted protein [Populus trichocarpa]	gi|159459642|gb|AC214029.1|	1195	0	Populus trichocarpa clone POP033-H19, complete sequence	sp|Q9LJR3|SPA3_ARATH	323	1e-88	Protein SPA1-RELATED 3 OS=Arabidopsis thaliana GN=SPA3 PE=1 SV=1
CL10323.Contig1_All	521	50	5.3494	55	6.0797	gi|224081441|ref|XP_002306412.1|	327.4	6e-89	predicted protein [Populus trichocarpa] >gi|222855861|gb|EEE93408.1| predicted protein [Populus trichocarpa]	gi|449464647|ref|XM_004149993.1|	135	5e-29	PREDICTED: Cucumis sativus uncharacterized LOC101220153 (LOC101220153), mRNA >gi|449502507|ref|XM_004161612.1| PREDICTED: Cucumis sativus uncharacterized LOC101229610 (LOC101229610), mRNA	sp|Q93W28|Y4554_ARATH	67.8	3e-12	Uncharacterized protein At4g15545 OS=Arabidopsis thaliana GN=At4g15545 PE=1 SV=1
CL10323.Contig2_All	1110	195	9.7923	239	12.4004	gi|224094224|ref|XP_002310098.1|	568.2	9e-161	predicted protein [Populus trichocarpa] >gi|118488461|gb|ABK96045.1| unknown [Populus trichocarpa] >gi|222853001|gb|EEE90548.1| predicted protein [Populus trichocarpa]	gi|359494542|ref|XM_002266093.2|	248	1e-62	PREDICTED: Vitis vinifera uncharacterized LOC100261617 (LOC100261617), mRNA	sp|Q93W28|Y4554_ARATH	192	4e-49	Uncharacterized protein At4g15545 OS=Arabidopsis thaliana GN=At4g15545 PE=1 SV=1
CL10324.Contig1_All	371	67	10.0664	52	8.0721	gi|224146601|ref|XP_002326066.1|	177.6	5e-44	predicted protein [Populus trichocarpa] >gi|222862941|gb|EEF00448.1| predicted protein [Populus trichocarpa]	gi|470117147|ref|XR_184281.1|	58	7e-06	PREDICTED: Fragaria vesca subsp. vesca uncharacterized LOC101294152 (LOC101294152), misc_RNA	--	--	--	--
CL10324.Contig2_All	370	92	13.8598	137	21.3245	gi|224124820|ref|XP_002319430.1|	198.4	2e-50	predicted protein [Populus trichocarpa] >gi|222857806|gb|EEE95353.1| predicted protein [Populus trichocarpa]	gi|470117147|ref|XR_184281.1|	63.9	1e-07	PREDICTED: Fragaria vesca subsp. vesca uncharacterized LOC101294152 (LOC101294152), misc_RNA	--	--	--	--
CL10325.Contig1_All	606	20	1.8396	15	1.4255	gi|224088174|ref|XP_002308355.1|	233.8	1e-60	predicted protein [Populus trichocarpa] >gi|222854331|gb|EEE91878.1| predicted protein [Populus trichocarpa]	gi|359482159|ref|XM_003632672.1|	210	1e-51	PREDICTED: Vitis vinifera uncharacterized LOC100257143 (LOC100257143), mRNA	--	--	--	--
CL10325.Contig2_All	738	38	2.8701	37	2.8874	gi|224088174|ref|XP_002308355.1|	233.8	2e-60	predicted protein [Populus trichocarpa] >gi|222854331|gb|EEE91878.1| predicted protein [Populus trichocarpa]	gi|359482159|ref|XM_003632672.1|	210	2e-51	PREDICTED: Vitis vinifera uncharacterized LOC100257143 (LOC100257143), mRNA	--	--	--	--
CL10326.Contig1_All	1497	22	0.8192	27	1.0387	gi|224117602|ref|XP_002331677.1|	666.4	0	predicted protein [Populus trichocarpa] >gi|222874096|gb|EEF11227.1| predicted protein [Populus trichocarpa]	gi|160953939|emb|CU224794.1|	285	7e-74	Populus EST from leave	sp|Q9FHH8|COL5_ARATH	378	6e-105	Zinc finger protein CONSTANS-LIKE 5 OS=Arabidopsis thaliana GN=COL5 PE=2 SV=2
CL10326.Contig2_All	958	270	15.7098	247	14.8488	gi|224142289|ref|XP_002324491.1|	568.9	4e-161	predicted protein [Populus trichocarpa] >gi|222865925|gb|EEF03056.1| predicted protein [Populus trichocarpa]	gi|160953939|emb|CU224794.1|	226	3e-56	Populus EST from leave	sp|Q9FHH8|COL5_ARATH	322	3e-88	Zinc finger protein CONSTANS-LIKE 5 OS=Arabidopsis thaliana GN=COL5 PE=2 SV=2
CL10326.Contig3_All	1621	171	5.8801	175	6.2175	gi|224117602|ref|XP_002331677.1|	666.4	0	predicted protein [Populus trichocarpa] >gi|222874096|gb|EEF11227.1| predicted protein [Populus trichocarpa]	gi|160953939|emb|CU224794.1|	285	7e-74	Populus EST from leave	sp|Q9FHH8|COL5_ARATH	378	6e-105	Zinc finger protein CONSTANS-LIKE 5 OS=Arabidopsis thaliana GN=COL5 PE=2 SV=2
CL10327.Contig1_All	249	33	7.3873	21	4.8571	--	--	--	--	gi|159459642|gb|AC214029.1|	357	3e-96	Populus trichocarpa clone POP033-H19, complete sequence	--	--	--	--
CL10328.Contig1_All	566	109	10.7345	108	10.9892	gi|224054568|ref|XP_002298325.1|	339.7	1e-92	predicted protein [Populus trichocarpa] >gi|222845583|gb|EEE83130.1| predicted protein [Populus trichocarpa]	gi|470116199|ref|XM_004294225.1|	167	2e-38	PREDICTED: Fragaria vesca subsp. vesca uncharacterized LOC101299456 (LOC101299456), mRNA	--	--	--	--
CL10328.Contig2_All	720	305	23.6123	291	23.2766	gi|224104321|ref|XP_002313395.1|	340.1	2e-92	predicted protein [Populus trichocarpa] >gi|222849803|gb|EEE87350.1| predicted protein [Populus trichocarpa]	gi|470116199|ref|XM_004294225.1|	165	8e-38	PREDICTED: Fragaria vesca subsp. vesca uncharacterized LOC101299456 (LOC101299456), mRNA	--	--	--	--
CL10329.Contig1_All	253	11	2.4235	16	3.6422	gi|224083175|ref|XP_002306958.1|	167.5	5e-41	predicted protein [Populus trichocarpa] >gi|222856407|gb|EEE93954.1| predicted protein [Populus trichocarpa]	gi|224083174|ref|XM_002306922.1|	454	1e-125	Populus trichocarpa predicted protein, mRNA	sp|Q9SGS5|Y1607_ARATH	73.9	2e-14	Uncharacterized protein At1g76070 OS=Arabidopsis thaliana GN=At1g76070 PE=1 SV=1
CL10329.Contig2_All	797	413	28.8844	342	24.7131	gi|224065741|ref|XP_002301948.1|	490.7	1e-137	predicted protein [Populus trichocarpa] >gi|222843674|gb|EEE81221.1| predicted protein [Populus trichocarpa]	gi|147855293|emb|AM480535.2|	99.6	4e-18	Vitis vinifera contig VV78X013557.19, whole genome shotgun sequence	sp|Q9SGS5|Y1607_ARATH	146	2e-35	Uncharacterized protein At1g76070 OS=Arabidopsis thaliana GN=At1g76070 PE=1 SV=1
CL1033.Contig1_All	1635	219	7.4662	212	7.4675	gi|224056204|ref|XP_002298754.1|	986.1	0	predicted protein [Populus trichocarpa] >gi|222846012|gb|EEE83559.1| predicted protein [Populus trichocarpa]	gi|359475493|ref|XM_002270163.2|	753	0	PREDICTED: Vitis vinifera alpha-L-fucosidase 2-like (LOC100266190), mRNA	sp|Q8L7W8|FUCO2_ARATH	751	0	Alpha-L-fucosidase 2 OS=Arabidopsis thaliana GN=At4g34260 PE=2 SV=1
CL1033.Contig2_All	277	6	1.2074	2	0.4158	gi|224056204|ref|XP_002298754.1|	159.5	1e-38	predicted protein [Populus trichocarpa] >gi|222846012|gb|EEE83559.1| predicted protein [Populus trichocarpa]	gi|156523309|gb|AC209038.1|	494	1e-137	Populus trichocarpa clone POP007-J20, complete sequence	sp|Q8L7W8|FUCO2_ARATH	100	2e-22	Alpha-L-fucosidase 2 OS=Arabidopsis thaliana GN=At4g34260 PE=2 SV=1
CL10330.Contig1_All	614	41	3.7221	55	5.1589	gi|255582234|ref|XP_002531909.1|	216.1	3e-55	conserved hypothetical protein [Ricinus communis] >gi|223528449|gb|EEF30482.1| conserved hypothetical protein [Ricinus communis]	gi|224059637|ref|XM_002299910.1|	597	1e-168	Populus trichocarpa predicted protein, mRNA	--	--	--	--
CL10330.Contig2_All	207	22	5.9241	24	6.6773	gi|255582234|ref|XP_002531909.1|	112.1	2e-24	conserved hypothetical protein [Ricinus communis] >gi|223528449|gb|EEF30482.1| conserved hypothetical protein [Ricinus communis]	gi|224059637|ref|XM_002299910.1|	262	1e-67	Populus trichocarpa predicted protein, mRNA	--	--	--	--
CL10331.Contig1_All	1143	657	32.0399	599	30.1814	gi|224142709|ref|XP_002324697.1|	540	2e-152	predicted protein [Populus trichocarpa] >gi|222866131|gb|EEF03262.1| predicted protein [Populus trichocarpa]	gi|363807513|ref|NM_001255725.1|	234	2e-58	Glycine max uncharacterized LOC100813503 (LOC100813503), mRNA	--	--	--	--
CL10331.Contig2_All	208	53	14.2031	39	10.7984	gi|224087315|ref|XP_002308117.1|	142.1	2e-33	predicted protein [Populus trichocarpa] >gi|222854093|gb|EEE91640.1| predicted protein [Populus trichocarpa]	gi|224087314|ref|XM_002308081.1|	381	1e-103	Populus trichocarpa predicted protein, mRNA	--	--	--	--
CL10332.Contig1_All	917	399	24.2535	366	22.9864	gi|118485904|gb|ABK94798.1|	408.7	6e-113	unknown [Populus trichocarpa]	gi|224104660|ref|XM_002313484.1|	710	0	Populus trichocarpa fasciclin-like AGP 14.9 protein (PtrFLA14-9), mRNA	sp|Q8LEE9|FLA12_ARATH	188	3e-48	Fasciclin-like arabinogalactan protein 12 OS=Arabidopsis thaliana GN=FLA12 PE=2 SV=2
CL10332.Contig2_All	846	366	24.1147	396	26.9578	gi|47717923|gb|AAT37953.1|	515.4	4e-145	fasciclin-like AGP 10 [Populus tremula x Populus alba]	gi|47717922|gb|AY607762.1|	1489	0	Populus alba x Populus tremula fasciclin-like AGP 10 (FLA10) mRNA, complete cds	sp|Q8LEE9|FLA12_ARATH	202	3e-52	Fasciclin-like arabinogalactan protein 12 OS=Arabidopsis thaliana GN=FLA12 PE=2 SV=2
CL10333.Contig1_All	351	31	4.923	27	4.4301	gi|224133746|ref|XP_002327670.1|	243	1e-63	gdp-mannose 4,6-dehydratase [Populus trichocarpa] >gi|222836755|gb|EEE75148.1| gdp-mannose 4,6-dehydratase [Populus trichocarpa]	gi|224133745|ref|XM_002327634.1|	648	0	Populus trichocarpa gdp-mannose 4,6-dehydratase, mRNA	sp|P93031|GMD2_ARATH	210	2e-55	GDP-mannose 4,6 dehydratase 2 OS=Arabidopsis thaliana GN=MUR1 PE=1 SV=3
CL10333.Contig2_All	1294	638	27.4826	688	30.6206	gi|224097148|ref|XP_002310852.1|	742.3	0	predicted protein [Populus trichocarpa] >gi|118486218|gb|ABK94951.1| unknown [Populus trichocarpa] >gi|222853755|gb|EEE91302.1| predicted protein [Populus trichocarpa]	gi|160333972|gb|AC214417.1|	2307	0	Populus trichocarpa clone POP037-E08, complete sequence	sp|Q9SNY3|GMD1_ARATH	651	0	GDP-mannose 4,6 dehydratase 1 OS=Arabidopsis thaliana GN=GMD1 PE=2 SV=1
CL10334.Contig1_All	892	215	13.4352	159	10.2658	gi|224116708|ref|XP_002331858.1|	393.7	2e-108	predicted protein [Populus trichocarpa] >gi|222875376|gb|EEF12507.1| predicted protein [Populus trichocarpa]	gi|470126829|ref|XM_004299337.1|	531	1e-148	PREDICTED: Fragaria vesca subsp. vesca vacuolar protein sorting-associated protein 29-like (LOC101312634), mRNA	sp|Q9STT2|VPS29_ARATH	348	3e-96	Vacuolar protein sorting-associated protein 29 OS=Arabidopsis thaliana GN=VPS29 PE=2 SV=1
CL10334.Contig2_All	873	286	18.261	262	17.2841	gi|224116708|ref|XP_002331858.1|	395.2	7e-109	predicted protein [Populus trichocarpa] >gi|222875376|gb|EEF12507.1| predicted protein [Populus trichocarpa]	gi|470126829|ref|XM_004299337.1|	561	1e-157	PREDICTED: Fragaria vesca subsp. vesca vacuolar protein sorting-associated protein 29-like (LOC101312634), mRNA	sp|Q9STT2|VPS29_ARATH	346	9e-96	Vacuolar protein sorting-associated protein 29 OS=Arabidopsis thaliana GN=VPS29 PE=2 SV=1
CL10335.Contig1_All	1798	793	24.5841	725	23.2224	gi|224111270|ref|XP_002315799.1|	792.3	0	predicted protein [Populus trichocarpa] >gi|222864839|gb|EEF01970.1| predicted protein [Populus trichocarpa]	gi|225425761|ref|XM_002277220.1|	952	0	PREDICTED: Vitis vinifera protein kinase 2B, chloroplastic-like (LOC100253317), mRNA	sp|O49840|APK2B_ARATH	635	0	Protein kinase 2B, chloroplastic OS=Arabidopsis thaliana GN=APK2B PE=1 SV=1
CL10335.Contig2_All	1052	210	11.1269	203	11.1132	gi|224111270|ref|XP_002315799.1|	364.4	1e-99	predicted protein [Populus trichocarpa] >gi|222864839|gb|EEF01970.1| predicted protein [Populus trichocarpa]	gi|225425761|ref|XM_002277220.1|	452	1e-124	PREDICTED: Vitis vinifera protein kinase 2B, chloroplastic-like (LOC100253317), mRNA	sp|O49840|APK2B_ARATH	298	4e-81	Protein kinase 2B, chloroplastic OS=Arabidopsis thaliana GN=APK2B PE=1 SV=1
CL10336.Contig1_All	2159	188	4.8537	173	4.6148	gi|224076932|ref|XP_002305056.1|	1188.7	0	predicted protein [Populus trichocarpa] >gi|222848020|gb|EEE85567.1| predicted protein [Populus trichocarpa]	gi|225443737|ref|XM_002265510.1|	1005	0	PREDICTED: Vitis vinifera uncharacterized LOC100241189 (LOC100241189), mRNA	sp|Q9LQI7|CIA30_ARATH	53.9	4e-07	Probable complex I intermediate-associated protein 30 OS=Arabidopsis thaliana GN=At1g17350 PE=1 SV=2
CL10336.Contig2_All	2082	110	2.945	93	2.5725	gi|224076932|ref|XP_002305056.1|	1188.7	0	predicted protein [Populus trichocarpa] >gi|222848020|gb|EEE85567.1| predicted protein [Populus trichocarpa]	gi|225443737|ref|XM_002265510.1|	1005	0	PREDICTED: Vitis vinifera uncharacterized LOC100241189 (LOC100241189), mRNA	sp|Q9LQI7|CIA30_ARATH	53.9	3e-07	Probable complex I intermediate-associated protein 30 OS=Arabidopsis thaliana GN=At1g17350 PE=1 SV=2
CL10337.Contig1_All	408	38	5.1915	64	9.034	gi|118485322|gb|ABK94520.1|	180.3	8e-45	unknown [Populus trichocarpa]	gi|118485321|gb|EF146445.1|	737	0	Populus trichocarpa clone WS0118_D16 unknown mRNA	sp|Q8LDN4|CLE46_ARATH	62.8	6e-11	CLAVATA3/ESR (CLE)-related protein 46 OS=Arabidopsis thaliana GN=CLE46 PE=3 SV=1
CL10337.Contig2_All	228	8	1.9558	20	5.0519	gi|118485322|gb|ABK94520.1|	96.7	1e-19	unknown [Populus trichocarpa]	gi|224106512|ref|XM_002314155.1|	159	1e-36	Populus trichocarpa predicted protein, mRNA	--	--	--	--
CL10338.Contig1_All	1131	1098	54.1142	1073	54.6382	gi|118481641|gb|ABK92762.1|	518.9	6e-146	unknown [Populus trichocarpa]	gi|88660665|gb|DQ375553.1|	454	1e-125	Populus trichocarpa succinate dehydrogenase subunit 4 (sdh4) gene, complete cds; mitochondrial	sp|P38460|YMF17_MARPO	92	6e-19	Uncharacterized mitochondrial protein ymf17 OS=Marchantia polymorpha GN=YMF17 PE=4 SV=1
CL10338.Contig2_All	481	119	13.7903	158	18.9178	gi|224087510|ref|XP_002308182.1|	250	1e-65	predicted protein [Populus trichocarpa] >gi|222854158|gb|EEE91705.1| predicted protein [Populus trichocarpa]	gi|292747476|dbj|AK337293.1|	67.9	9e-09	Lotus japonicus cDNA, clone: LjFL1-054-AF11, HTC	sp|Q8W487|YB95_ARATH	58.9	1e-09	Uncharacterized protein At2g39795, mitochondrial OS=Arabidopsis thaliana GN=At2g39795 PE=1 SV=1
CL10339.Contig1_All	427	7	0.9138	8	1.079	gi|118488995|gb|ABK96305.1|	218.4	2e-56	unknown [Populus trichocarpa x Populus deltoides]	gi|470133458|ref|XM_004302535.1|	186	1e-44	PREDICTED: Fragaria vesca subsp. vesca uncharacterized LOC101294477 (LOC101294477), mRNA	--	--	--	--
CL10339.Contig2_All	811	203	13.9523	208	14.7707	gi|118488995|gb|ABK96305.1|	443.4	2e-123	unknown [Populus trichocarpa x Populus deltoides]	gi|470133458|ref|XM_004302535.1|	301	6e-79	PREDICTED: Fragaria vesca subsp. vesca uncharacterized LOC101294477 (LOC101294477), mRNA	--	--	--	--
CL1034.Contig1_All	443	80	10.066	101	13.1304	--	--	--	--	gi|224100354|ref|XM_002311809.1|	135	4e-29	Populus trichocarpa predicted protein, mRNA	--	--	--	--
CL1034.Contig2_All	470	80	9.4878	132	16.1747	--	--	--	--	gi|224100354|ref|XM_002311809.1|	135	5e-29	Populus trichocarpa predicted protein, mRNA	--	--	--	--
CL10340.Contig1_All	1386	74	2.976	75	3.1164	gi|224101821|ref|XP_002312433.1|	637.5	0	predicted protein [Populus trichocarpa] >gi|222852253|gb|EEE89800.1| predicted protein [Populus trichocarpa]	gi|359472632|ref|XM_002284197.2|	668	0	PREDICTED: Vitis vinifera probable nicotinate-nucleotide pyrophosphorylase [carboxylating]-like (LOC100250945), mRNA	--	--	--	--
CL10340.Contig2_All	1532	198	7.2041	252	9.4733	gi|224101821|ref|XP_002312433.1|	636	0	predicted protein [Populus trichocarpa] >gi|222852253|gb|EEE89800.1| predicted protein [Populus trichocarpa]	gi|359472632|ref|XM_002284197.2|	660	0	PREDICTED: Vitis vinifera probable nicotinate-nucleotide pyrophosphorylase [carboxylating]-like (LOC100250945), mRNA	--	--	--	--
CL10341.Contig1_All	319	61	10.6589	80	14.443	gi|118484191|gb|ABK93976.1|	156.8	9e-38	unknown [Populus trichocarpa]	gi|118484190|gb|EF145858.1|	375	1e-101	Populus trichocarpa clone WS0113_M21 unknown mRNA	sp|Q9LS95|PERK6_ARATH	45.8	6e-06	Putative proline-rich receptor-like protein kinase PERK6 OS=Arabidopsis thaliana GN=PERK6 PE=2 SV=2
CL10341.Contig2_All	1232	87	3.9362	75	3.506	gi|118484191|gb|ABK93976.1|	323.6	4e-87	unknown [Populus trichocarpa]	gi|470109461|ref|XM_004290968.1|	149	8e-33	PREDICTED: Fragaria vesca subsp. vesca uncharacterized LOC101302032 (LOC101302032), mRNA	sp|Q84ZL0|FH5_ORYSJ	31.6	2e-09	Formin-like protein 5 OS=Oryza sativa subsp. japonica GN=FH5 PE=2 SV=2
CL10341.Contig3_All	420	59	7.8302	44	6.0334	gi|224088934|ref|XP_002308582.1|	133.7	9e-31	predicted protein [Populus trichocarpa] >gi|222854558|gb|EEE92105.1| predicted protein [Populus trichocarpa]	gi|356552327|ref|XM_003544472.1|	73.8	1e-10	PREDICTED: Glycine max uncharacterized protein LOC100812595 (LOC100812595), mRNA	--	--	--	--
CL10342.Contig1_All	207	15	4.0392	7	1.9475	gi|224056236|ref|XP_002298769.1|	134.8	4e-31	predicted protein [Populus trichocarpa] >gi|222846027|gb|EEE83574.1| predicted protein [Populus trichocarpa]	gi|224056235|ref|XM_002298733.1|	394	1e-107	Populus trichocarpa predicted protein, mRNA	--	--	--	--
CL10343.Contig1_All	339	37	6.0838	36	6.1159	gi|224075718|ref|XP_002304734.1|	161	5e-39	predicted protein [Populus trichocarpa] >gi|222842166|gb|EEE79713.1| predicted protein [Populus trichocarpa]	gi|114158745|gb|AC185363.2|	234	5e-59	Populus trichocarpa clone Pop1-63B19, complete sequence	sp|Q9SZ53|P2C60_ARATH	92.8	4e-20	Probable protein phosphatase 2C 60 OS=Arabidopsis thaliana GN=At4g31860 PE=2 SV=1
CL10343.Contig2_All	736	121	9.1639	145	11.3462	gi|224115760|ref|XP_002332050.1|	169.9	3e-41	predicted protein [Populus trichocarpa] >gi|222831936|gb|EEE70413.1| predicted protein [Populus trichocarpa]	gi|114158745|gb|AC185363.2|	615	1e-173	Populus trichocarpa clone Pop1-63B19, complete sequence	sp|Q9SZ53|P2C60_ARATH	106	2e-23	Probable protein phosphatase 2C 60 OS=Arabidopsis thaliana GN=At4g31860 PE=2 SV=1
CL10344.Contig1_All	938	7	0.416	4	0.2456	gi|27817931|dbj|BAC55695.1|	57.4	4e-07	putative diaphanous homologue [Oryza sativa Japonica Group]	gi|160949391|emb|CU222824.1|	159	6e-36	Populus EST from leave	sp|Q84ZL0|FH5_ORYSJ	57.4	1e-08	Formin-like protein 5 OS=Oryza sativa subsp. japonica GN=FH5 PE=2 SV=2
CL10344.Contig2_All	845	0	0	2	0.1363	gi|27817931|dbj|BAC55695.1|	57.4	3e-07	putative diaphanous homologue [Oryza sativa Japonica Group]	gi|47900639|gb|AC149299.1|	79.8	4e-12	Populus trichocarpa clone Pop1-037B22, complete sequence	sp|Q84ZL0|FH5_ORYSJ	57.4	1e-08	Formin-like protein 5 OS=Oryza sativa subsp. japonica GN=FH5 PE=2 SV=2
CL10344.Contig3_All	827	0	0	2	0.1393	gi|27817931|dbj|BAC55695.1|	57.4	3e-07	putative diaphanous homologue [Oryza sativa Japonica Group]	gi|158631308|gb|AC213159.1|	73.8	3e-10	Populus trichocarpa clone POP091-F21, complete sequence	sp|Q84ZL0|FH5_ORYSJ	57.4	1e-08	Formin-like protein 5 OS=Oryza sativa subsp. japonica GN=FH5 PE=2 SV=2
CL10345.Contig1_All	1157	435	20.9569	420	20.9062	gi|224098113|ref|XP_002311121.1|	526.9	2e-148	predicted protein [Populus trichocarpa] >gi|222850941|gb|EEE88488.1| predicted protein [Populus trichocarpa]	gi|470143540|ref|XM_004307384.1|	424	1e-116	PREDICTED: Fragaria vesca subsp. vesca protein TONNEAU 1b-like (LOC101311799), mRNA	sp|Q9FQ25|TON1A_ARATH	371	4e-103	Protein TONNEAU 1a OS=Arabidopsis thaliana GN=TON1A PE=1 SV=1
CL10345.Contig2_All	1161	342	16.4197	438	21.7271	gi|224112929|ref|XP_002316335.1|	504.2	1e-141	predicted protein [Populus trichocarpa] >gi|222865375|gb|EEF02506.1| predicted protein [Populus trichocarpa]	gi|160952468|emb|CU224119.1|	486	1e-134	Populus EST from leave	sp|Q9FQ25|TON1A_ARATH	369	1e-102	Protein TONNEAU 1a OS=Arabidopsis thaliana GN=TON1A PE=1 SV=1
CL10346.Contig1_All	566	77	7.5831	70	7.1226	gi|224056565|ref|XP_002298913.1|	367.1	9e-101	predicted protein [Populus trichocarpa] >gi|222846171|gb|EEE83718.1| predicted protein [Populus trichocarpa]	gi|225462108|ref|XM_002277806.1|	531	1e-148	PREDICTED: Vitis vinifera polyadenylate-binding protein, cytoplasmic and nuclear-like (LOC100251410), mRNA	sp|Q05196|PABP5_ARATH	53.9	6e-08	Polyadenylate-binding protein 5 OS=Arabidopsis thaliana GN=PAB5 PE=1 SV=3
CL10347.Contig1_All	1254	853	37.916	775	35.5929	gi|224056413|ref|XP_002298844.1|	638.3	0	predicted protein [Populus trichocarpa] >gi|222846102|gb|EEE83649.1| predicted protein [Populus trichocarpa]	gi|470123416|ref|XM_004297675.1|	706	0	PREDICTED: Fragaria vesca subsp. vesca cell differentiation protein RCD1 homolog, transcript variant 2 (LOC101310507), mRNA	--	--	--	--
CL10348.Contig1_All	366	15	2.2845	21	3.3044	--	--	--	--	gi|337730168|gb|JN127774.1|	61.9	4e-07	Theobroma cacao clone TCC_BC090G10, complete sequence	--	--	--	--
CL10348.Contig2_All	631	39	3.4451	34	3.1032	--	--	--	--	--	--	--	--	--	--	--	--
CL10349.Contig1_All	435	158	20.246	187	24.7578	gi|224142886|ref|XP_002324765.1|	103.2	1e-21	predicted protein [Populus trichocarpa] >gi|222866199|gb|EEF03330.1| predicted protein [Populus trichocarpa]	gi|356564056|ref|XM_003550225.1|	60	2e-06	PREDICTED: Glycine max uncharacterized protein LOC100779137 (LOC100779137), mRNA	--	--	--	--
CL10349.Contig2_All	1815	479	14.7106	425	13.4856	gi|224088840|ref|XP_002308563.1|	937.6	0	predicted protein [Populus trichocarpa] >gi|222854539|gb|EEE92086.1| predicted protein [Populus trichocarpa]	gi|356554073|ref|XM_003545326.1|	200	4e-48	PREDICTED: Glycine max serine/threonine-protein kinase CTR1-like (LOC100779790), mRNA	sp|Q9FPR3|EDR1_ARATH	236	3e-62	Serine/threonine-protein kinase EDR1 OS=Arabidopsis thaliana GN=EDR1 PE=1 SV=1
CL1035.Contig1_All	1750	73	2.3252	53	1.7442	gi|224143479|ref|XP_002324970.1|	973.4	0	predicted protein [Populus trichocarpa] >gi|222866404|gb|EEF03535.1| predicted protein [Populus trichocarpa]	gi|359484609|ref|XM_002281317.2|	1223	0	PREDICTED: Vitis vinifera protein mrp homolog (LOC100250898), mRNA	sp|Q9MUM5|MIND_MESVI	57.8	2e-08	Putative septum site-determining protein MinD OS=Mesostigma viride GN=minD PE=3 SV=1
CL1035.Contig2_All	1764	62	1.9591	63	2.0568	gi|224143479|ref|XP_002324970.1|	840.5	0	predicted protein [Populus trichocarpa] >gi|222866404|gb|EEF03535.1| predicted protein [Populus trichocarpa]	gi|359484609|ref|XM_002281317.2|	1055	0	PREDICTED: Vitis vinifera protein mrp homolog (LOC100250898), mRNA	sp|Q9MUM5|MIND_MESVI	57.8	2e-08	Putative septum site-determining protein MinD OS=Mesostigma viride GN=minD PE=3 SV=1
CL1035.Contig3_All	2107	535	14.1534	497	13.5847	gi|224143479|ref|XP_002324970.1|	974.9	0	predicted protein [Populus trichocarpa] >gi|222866404|gb|EEF03535.1| predicted protein [Populus trichocarpa]	gi|359484609|ref|XM_002281317.2|	1223	0	PREDICTED: Vitis vinifera protein mrp homolog (LOC100250898), mRNA	sp|Q9MUM5|MIND_MESVI	57.8	2e-08	Putative septum site-determining protein MinD OS=Mesostigma viride GN=minD PE=3 SV=1
CL10350.Contig1_All	1025	479	26.0485	417	23.43	gi|224138684|ref|XP_002326664.1|	449.9	3e-125	predicted protein [Populus trichocarpa] >gi|222833986|gb|EEE72463.1| predicted protein [Populus trichocarpa]	gi|156447066|gb|AC208999.1|	462	1e-127	Populus trichocarpa clone POP021-B12, complete sequence	sp|Q93VG8|PPDEX_ARATH	325	3e-89	DeSI-like protein At4g17486 OS=Arabidopsis thaliana GN=At4g17486 PE=2 SV=1
CL10350.Contig2_All	348	102	16.3378	80	13.2394	--	--	--	--	gi|156447066|gb|AC208999.1|	135	3e-29	Populus trichocarpa clone POP021-B12, complete sequence	--	--	--	--
CL10351.Contig1_All	463	16	1.9262	8	0.9951	gi|224077376|ref|XP_002305235.1|	262.3	1e-69	predicted protein [Populus trichocarpa] >gi|222848199|gb|EEE85746.1| predicted protein [Populus trichocarpa]	gi|114158740|gb|AC184078.2|	228	4e-57	Populus trichocarpa clone Pop1-53M5, complete sequence	sp|Q93WJ9|KAN1_ARATH	75.9	1e-14	Transcription repressor KAN1 OS=Arabidopsis thaliana GN=KAN1 PE=1 SV=1
CL10351.Contig2_All	379	71	10.4422	59	8.9654	gi|224069150|ref|XP_002302912.1|	241.1	3e-63	predicted protein [Populus trichocarpa] >gi|222844638|gb|EEE82185.1| predicted protein [Populus trichocarpa]	gi|159884259|gb|AC214214.1|	280	1e-72	Populus trichocarpa clone POP028-A01, complete sequence	sp|Q93WJ9|KAN1_ARATH	107	2e-24	Transcription repressor KAN1 OS=Arabidopsis thaliana GN=KAN1 PE=1 SV=1
CL10351.Contig3_All	608	146	13.3851	64	6.0623	gi|224077376|ref|XP_002305235.1|	75.5	5e-65	predicted protein [Populus trichocarpa] >gi|222848199|gb|EEE85746.1| predicted protein [Populus trichocarpa]	gi|114158740|gb|AC184078.2|	676	0	Populus trichocarpa clone Pop1-53M5, complete sequence	sp|Q93WJ9|KAN1_ARATH	52	3e-07	Transcription repressor KAN1 OS=Arabidopsis thaliana GN=KAN1 PE=1 SV=1
CL10352.Contig1_All	568	64	6.2806	39	3.9544	gi|224121242|ref|XP_002318534.1|	351.7	4e-96	tir-nbs-lrr resistance protein [Populus trichocarpa] >gi|222859207|gb|EEE96754.1| tir-nbs-lrr resistance protein [Populus trichocarpa]	gi|224121241|ref|XM_002318498.1|	1011	0	Populus trichocarpa tir-nbs-lrr resistance protein, mRNA	--	--	--	--
CL10352.Contig2_All	899	232	14.3847	229	14.6702	gi|224133150|ref|XP_002321495.1|	386.3	3e-106	predicted protein [Populus trichocarpa] >gi|222868491|gb|EEF05622.1| predicted protein [Populus trichocarpa]	gi|224121241|ref|XM_002318498.1|	563	1e-157	Populus trichocarpa tir-nbs-lrr resistance protein, mRNA	--	--	--	--
CL10353.Contig1_All	406	105	14.4157	70	9.9296	gi|224122870|ref|XP_002330384.1|	269.6	1e-71	predicted protein [Populus trichocarpa] >gi|222871769|gb|EEF08900.1| predicted protein [Populus trichocarpa]	gi|164663927|gb|AC216603.1|	285	2e-74	Populus trichocarpa clone POP093-E09, complete sequence	sp|Q8L6Y1|UBP14_ARATH	203	2e-53	Ubiquitin carboxyl-terminal hydrolase 14 OS=Arabidopsis thaliana GN=UBP14 PE=1 SV=1
CL10353.Contig2_All	1507	496	18.3459	422	16.1272	gi|224122870|ref|XP_002330384.1|	686	0	predicted protein [Populus trichocarpa] >gi|222871769|gb|EEF08900.1| predicted protein [Populus trichocarpa]	gi|164519398|gb|AC216449.1|	922	0	Populus trichocarpa clone POP006-O09, complete sequence	sp|Q8L6Y1|UBP14_ARATH	579	2e-165	Ubiquitin carboxyl-terminal hydrolase 14 OS=Arabidopsis thaliana GN=UBP14 PE=1 SV=1
CL10354.Contig1_All	740	73	5.4987	77	5.9926	gi|224080333|ref|XP_002306101.1|	458.8	4e-128	predicted protein [Populus trichocarpa] >gi|222849065|gb|EEE86612.1| predicted protein [Populus trichocarpa]	gi|115416651|emb|CT029533.1|	624	1e-176	Poplar cDNA sequences	sp|Q6NKZ9|Y4345_ARATH	370	4e-103	Probable receptor-like serine/threonine-protein kinase At4g34500 OS=Arabidopsis thaliana GN=At4g34500 PE=2 SV=1
CL10354.Contig2_All	264	55	11.6126	26	5.6719	gi|224080333|ref|XP_002306101.1|	162.2	2e-39	predicted protein [Populus trichocarpa] >gi|222849065|gb|EEE86612.1| predicted protein [Populus trichocarpa]	gi|359475173|ref|XM_003631561.1|	91.7	3e-16	PREDICTED: Vitis vinifera probable receptor-like serine/threonine-protein kinase At4g34500-like (LOC100852435), mRNA	sp|Q6NKZ9|Y4345_ARATH	106	4e-24	Probable receptor-like serine/threonine-protein kinase At4g34500 OS=Arabidopsis thaliana GN=At4g34500 PE=2 SV=1
CL10355.Contig1_All	278	13	2.6066	20	4.1433	--	--	--	--	--	--	--	--	--	--	--	--
CL10355.Contig2_All	348	15	2.4026	16	2.6479	--	--	--	--	--	--	--	--	--	--	--	--
CL10356.Contig1_All	391	104	14.8261	80	11.7834	gi|224123880|ref|XP_002319187.1|	197.6	5e-50	predicted protein [Populus trichocarpa] >gi|222857563|gb|EEE95110.1| predicted protein [Populus trichocarpa]	gi|168176841|gb|AC217585.1|	293	7e-77	Populus trichocarpa clone POP021-H02, complete sequence	sp|Q8LFN2|Y3037_ARATH	129	4e-31	Probable inactive leucine-rich repeat receptor-like protein kinase At3g03770 OS=Arabidopsis thaliana GN=At3g03770 PE=2 SV=1
CL10356.Contig2_All	503	62	6.8706	52	5.9538	gi|224123880|ref|XP_002319187.1|	236.1	1e-61	predicted protein [Populus trichocarpa] >gi|222857563|gb|EEE95110.1| predicted protein [Populus trichocarpa]	gi|168176841|gb|AC217585.1|	468	1e-129	Populus trichocarpa clone POP021-H02, complete sequence	sp|Q8LFN2|Y3037_ARATH	161	2e-40	Probable inactive leucine-rich repeat receptor-like protein kinase At3g03770 OS=Arabidopsis thaliana GN=At3g03770 PE=2 SV=1
CL10357.Contig1_All	520	68	7.2892	57	6.3129	gi|224139246|ref|XP_002323018.1|	277.7	6e-74	predicted protein [Populus trichocarpa] >gi|222867648|gb|EEF04779.1| predicted protein [Populus trichocarpa]	gi|164607231|gb|AC216544.1|	710	0	Populus trichocarpa clone POP016-D10, complete sequence	sp|Q9SR87|LRK61_ARATH	157	3e-39	Probable L-type lectin-domain containing receptor kinase VI.1 OS=Arabidopsis thaliana GN=LECRK61 PE=2 SV=1
CL10358.Contig1_All	1014	184	10.1147	124	7.0428	--	--	--	--	gi|165723318|gb|AC216676.1|	174	1e-40	Populus trichocarpa clone POP046-B08, complete sequence	--	--	--	--
CL10358.Contig2_All	337	22	3.6389	7	1.1963	--	--	--	--	gi|165723318|gb|AC216676.1|	551	1e-154	Populus trichocarpa clone POP046-B08, complete sequence	--	--	--	--
CL1036.Contig1_All	414	7	0.9425	6	0.8347	gi|224094288|ref|XP_002310126.1|	196.8	8e-50	predicted protein [Populus trichocarpa] >gi|222853029|gb|EEE90576.1| predicted protein [Populus trichocarpa]	gi|470103158|ref|XM_004287963.1|	224	6e-56	PREDICTED: Fragaria vesca subsp. vesca U1 small nuclear ribonucleoprotein A-like (LOC101312190), mRNA	sp|Q8VXZ9|R47BP_ARATH	47	4e-06	Polyadenylate-binding protein RBP47B' OS=Arabidopsis thaliana GN=RBP47B' PE=2 SV=1
CL1036.Contig2_All	666	90	7.5325	45	3.8913	gi|224094288|ref|XP_002310126.1|	413.3	1e-114	predicted protein [Populus trichocarpa] >gi|222853029|gb|EEE90576.1| predicted protein [Populus trichocarpa]	gi|470103158|ref|XM_004287963.1|	224	9e-56	PREDICTED: Fragaria vesca subsp. vesca U1 small nuclear ribonucleoprotein A-like (LOC101312190), mRNA	sp|Q8VXZ9|R47BP_ARATH	47	1e-05	Polyadenylate-binding protein RBP47B' OS=Arabidopsis thaliana GN=RBP47B' PE=2 SV=1
CL10360.Contig1_All	241	71	16.4215	26	6.2132	gi|255536791|ref|XP_002509462.1|	50.8	7e-06	conserved hypothetical protein [Ricinus communis] >gi|223549361|gb|EEF50849.1| conserved hypothetical protein [Ricinus communis]	gi|255536790|ref|XM_002509416.1|	60	1e-06	Ricinus communis conserved hypothetical protein, mRNA	--	--	--	--
CL10360.Contig2_All	208	56	15.0071	24	6.6452	gi|255536791|ref|XP_002509462.1|	50.8	7e-06	conserved hypothetical protein [Ricinus communis] >gi|223549361|gb|EEF50849.1| conserved hypothetical protein [Ricinus communis]	gi|255536790|ref|XM_002509416.1|	60	9e-07	Ricinus communis conserved hypothetical protein, mRNA	--	--	--	--
CL10361.Contig1_All	946	101	5.9512	95	5.7835	gi|224097801|ref|XP_002311076.1|	395.2	8e-109	predicted protein [Populus trichocarpa] >gi|222850896|gb|EEE88443.1| predicted protein [Populus trichocarpa]	gi|359486592|ref|XM_002270663.2|	492	1e-136	PREDICTED: Vitis vinifera ras-related protein RABF1-like (LOC100259851), mRNA	sp|Q9CB01|RABF1_ARATH	350	7e-97	Ras-related protein RABF1 OS=Arabidopsis thaliana GN=RABF1 PE=1 SV=1
CL10361.Contig2_All	886	541	34.0357	472	30.6809	gi|224113085|ref|XP_002316386.1|	397.5	1e-109	predicted protein [Populus trichocarpa] >gi|118488888|gb|ABK96253.1| unknown [Populus trichocarpa x Populus deltoides] >gi|222865426|gb|EEF02557.1| predicted protein [Populus trichocarpa]	gi|359486592|ref|XM_002270663.2|	529	1e-147	PREDICTED: Vitis vinifera ras-related protein RABF1-like (LOC100259851), mRNA	sp|Q9CB01|RABF1_ARATH	355	1e-98	Ras-related protein RABF1 OS=Arabidopsis thaliana GN=RABF1 PE=1 SV=1
CL10361.Contig3_All	887	101	6.347	135	8.7654	gi|224097801|ref|XP_002311076.1|	396	4e-109	predicted protein [Populus trichocarpa] >gi|222850896|gb|EEE88443.1| predicted protein [Populus trichocarpa]	gi|359486592|ref|XM_002270663.2|	500	1e-138	PREDICTED: Vitis vinifera ras-related protein RABF1-like (LOC100259851), mRNA	sp|Q9CB01|RABF1_ARATH	353	6e-98	Ras-related protein RABF1 OS=Arabidopsis thaliana GN=RABF1 PE=1 SV=1
CL10362.Contig1_All	321	16	2.7783	3	0.5382	--	--	--	--	gi|224134782|ref|XM_002327452.1|	97.6	7e-18	Populus trichocarpa NBS resistance protein, mRNA	--	--	--	--
CL10362.Contig2_All	264	1	0.2111	3	0.6545	--	--	--	--	--	--	--	--	--	--	--	--
CL10363.Contig1_All	339	23	3.7818	18	3.058	gi|224059292|ref|XP_002299810.1|	225.7	1e-58	predicted protein [Populus trichocarpa] >gi|222847068|gb|EEE84615.1| predicted protein [Populus trichocarpa]	gi|449520133|ref|XM_004167041.1|	60	2e-06	PREDICTED: Cucumis sativus uncharacterized LOC101228153 (LOC101228153), mRNA	--	--	--	--
CL10363.Contig2_All	585	105	10.0047	80	7.8758	gi|224106257|ref|XP_002314103.1|	388.7	3e-107	predicted protein [Populus trichocarpa] >gi|222850511|gb|EEE88058.1| predicted protein [Populus trichocarpa]	gi|395146501|gb|JX174446.1|	141	9e-31	Linum usitatissimum clone LuBAC375M9, complete sequence	sp|Q9M1B9|SCRK4_ARATH	48.5	3e-06	Probable fructokinase-4 OS=Arabidopsis thaliana GN=At3g59480 PE=2 SV=1
CL10364.Contig1_All	630	99	8.7592	98	8.9587	gi|224079900|ref|XP_002305965.1|	388.3	4e-107	predicted protein [Populus trichocarpa] >gi|222848929|gb|EEE86476.1| predicted protein [Populus trichocarpa]	gi|470136762|ref|XM_004304105.1|	305	3e-80	PREDICTED: Fragaria vesca subsp. vesca proline-rich receptor-like protein kinase PERK8-like (LOC101296691), mRNA	sp|Q9FFW5|PERK8_ARATH	342	1e-94	Proline-rich receptor-like protein kinase PERK8 OS=Arabidopsis thaliana GN=PERK8 PE=1 SV=1
CL10365.Contig1_All	220	9	2.2803	6	1.5707	gi|470115161|ref|XP_004293771.1|	35.8	2e-25	PREDICTED: uncharacterized protein LOC101293075 [Fragaria vesca subsp. vesca]	gi|160950831|emb|CU223581.1|	394	1e-107	Populus EST from leave	--	--	--	--
CL10365.Contig2_All	521	325	34.771	395	43.6635	gi|224134442|ref|XP_002321825.1|	241.9	3e-63	predicted protein [Populus trichocarpa] >gi|222868821|gb|EEF05952.1| predicted protein [Populus trichocarpa]	gi|160950831|emb|CU223581.1|	450	1e-124	Populus EST from leave	--	--	--	--
CL10366.Contig1_All	422	26	3.4343	18	2.4565	gi|470115780|ref|XP_004294069.1|	58.2	4e-08	PREDICTED: molybdenum cofactor sulfurase-like [Fragaria vesca subsp. vesca]	gi|165905716|gb|AC216685.1|	299	1e-78	Populus trichocarpa clone POP033-J03, complete sequence	sp|Q9C5X8|MOCOS_ARATH	109	7e-25	Molybdenum cofactor sulfurase OS=Arabidopsis thaliana GN=ABA3 PE=1 SV=1
CL10366.Contig2_All	486	27	3.0967	17	2.0145	gi|224094236|ref|XP_002310102.1|	276.9	8e-74	predicted protein [Populus trichocarpa] >gi|222853005|gb|EEE90552.1| predicted protein [Populus trichocarpa]	gi|165905716|gb|AC216685.1|	307	6e-81	Populus trichocarpa clone POP033-J03, complete sequence	sp|Q9C5X8|MOCOS_ARATH	215	9e-57	Molybdenum cofactor sulfurase OS=Arabidopsis thaliana GN=ABA3 PE=1 SV=1
CL10367.Contig1_All	609	100	9.1528	97	9.173	gi|224123136|ref|XP_002319003.1|	231.1	9e-60	predicted protein [Populus trichocarpa] >gi|222857379|gb|EEE94926.1| predicted protein [Populus trichocarpa]	gi|335320088|gb|GU280001.1|	178	4e-42	Populus balsamifera isolate WHR03 haplotype B flavin-containing monooxygenase family protein / FMO family protein gene, partial sequence	sp|Q94BV5|GSXL4_ARATH	139	2e-33	Flavin-containing monooxygenase FMO GS-OX-like 4 OS=Arabidopsis thaliana GN=At1g62600 PE=2 SV=1
CL10367.Contig2_All	560	63	6.2708	64	6.5819	gi|224123136|ref|XP_002319003.1|	235.3	4e-61	predicted protein [Populus trichocarpa] >gi|222857379|gb|EEE94926.1| predicted protein [Populus trichocarpa]	gi|335320088|gb|GU280001.1|	178	4e-42	Populus balsamifera isolate WHR03 haplotype B flavin-containing monooxygenase family protein / FMO family protein gene, partial sequence	sp|Q94BV5|GSXL4_ARATH	138	2e-33	Flavin-containing monooxygenase FMO GS-OX-like 4 OS=Arabidopsis thaliana GN=At1g62600 PE=2 SV=1
CL10368.Contig1_All	1360	112	4.5904	77	3.2607	gi|224141263|ref|XP_002323994.1|	848.2	0	predicted protein [Populus trichocarpa] >gi|222866996|gb|EEF04127.1| predicted protein [Populus trichocarpa]	gi|225452297|ref|XM_002272305.1|	537	1e-149	PREDICTED: Vitis vinifera uncharacterized LOC100264636 (LOC100264636), mRNA	--	--	--	--
CL10368.Contig2_All	1316	42	1.779	33	1.4442	gi|224141263|ref|XP_002323994.1|	802.4	0	predicted protein [Populus trichocarpa] >gi|222866996|gb|EEF04127.1| predicted protein [Populus trichocarpa]	gi|225452297|ref|XM_002272305.1|	476	1e-131	PREDICTED: Vitis vinifera uncharacterized LOC100264636 (LOC100264636), mRNA	--	--	--	--
CL10369.Contig1_All	874	63	4.0179	48	3.1629	gi|462414973|gb|EMJ19710.1|	252.3	7e-66	hypothetical protein PRUPE_ppa012453mg [Prunus persica]	gi|359490713|ref|XM_002276410.2|	204	1e-49	PREDICTED: Vitis vinifera probable RNA-binding protein EIF1AD-like (LOC100248727), mRNA	sp|Q3EBI7|FB130_ARATH	50.8	1e-06	F-box protein At2g40910 OS=Arabidopsis thaliana GN=At2g40910 PE=2 SV=1
CL10369.Contig2_All	652	26	2.2228	25	2.2083	gi|359490714|ref|XP_002276446.2|	199.1	4e-50	PREDICTED: probable RNA-binding protein EIF1AD-like [Vitis vinifera]	gi|359490713|ref|XM_002276410.2|	196	2e-47	PREDICTED: Vitis vinifera probable RNA-binding protein EIF1AD-like (LOC100248727), mRNA	sp|Q3EBI7|FB130_ARATH	50.8	6e-07	F-box protein At2g40910 OS=Arabidopsis thaliana GN=At2g40910 PE=2 SV=1
CL1037.Contig1_All	1439	325	12.5891	279	11.1661	gi|224068328|ref|XP_002302707.1|	759.6	0	predicted protein [Populus trichocarpa] >gi|222844433|gb|EEE81980.1| predicted protein [Populus trichocarpa]	gi|359480232|ref|XM_002264768.2|	365	9e-98	PREDICTED: Vitis vinifera WD repeat-containing protein 89 homolog-like (LOC100264020), mRNA	sp|Q3Y8L7|WDR69_CHLRE	55.5	8e-08	Outer row dynein assembly protein 16 OS=Chlamydomonas reinhardtii GN=ODA16 PE=1 SV=1
CL10370.Contig1_All	358	66	10.2762	69	11.1001	gi|224137052|ref|XP_002327010.1|	195.3	2e-49	predicted protein [Populus trichocarpa] >gi|222835325|gb|EEE73760.1| predicted protein [Populus trichocarpa]	gi|160960660|emb|CU232968.1|	565	1e-158	Populus EST from severe drought-stressed opposite wood	--	--	--	--
CL10370.Contig2_All	466	143	17.1049	94	11.6172	gi|224137052|ref|XP_002327010.1|	208.4	3e-53	predicted protein [Populus trichocarpa] >gi|222835325|gb|EEE73760.1| predicted protein [Populus trichocarpa]	gi|160960660|emb|CU232968.1|	846	0	Populus EST from severe drought-stressed opposite wood	--	--	--	--
CL10371.Contig1_All	1199	120	5.5787	84	4.0348	gi|224125702|ref|XP_002319654.1|	620.2	2e-176	jumonji domain protein [Populus trichocarpa] >gi|222858030|gb|EEE95577.1| jumonji domain protein [Populus trichocarpa]	gi|224145808|ref|XM_002325736.1|	1423	0	Populus trichocarpa jumonji domain protein (JMJ908), mRNA	sp|Q8GUI6|JMJ14_ARATH	251	6e-67	Probable lysine-specific demethylase JMJ14 OS=Arabidopsis thaliana GN=JMJ14 PE=1 SV=1
CL10371.Contig2_All	597	79	7.3761	34	3.2799	gi|224125702|ref|XP_002319654.1|	234.2	1e-60	jumonji domain protein [Populus trichocarpa] >gi|222858030|gb|EEE95577.1| jumonji domain protein [Populus trichocarpa]	gi|224125701|ref|XM_002319618.1|	416	1e-113	Populus trichocarpa jumonji domain protein (JMJ907), mRNA	--	--	--	--
CL10372.Contig1_All	1828	143	4.3605	97	3.056	gi|224101599|ref|XP_002312347.1|	806.2	0	predicted protein [Populus trichocarpa] >gi|222852167|gb|EEE89714.1| predicted protein [Populus trichocarpa]	gi|359472724|ref|XM_002277456.2|	391	1e-105	PREDICTED: Vitis vinifera importin-9-like (LOC100268066), mRNA	--	--	--	--
CL10372.Contig2_All	1576	60	2.1221	41	1.4983	gi|255546937|ref|XP_002514526.1|	627.1	2e-178	importin, putative [Ricinus communis] >gi|223546130|gb|EEF47632.1| importin, putative [Ricinus communis]	gi|470124646|ref|XM_004298274.1|	323	3e-85	PREDICTED: Fragaria vesca subsp. vesca importin-9-like (LOC101294462), mRNA	--	--	--	--
CL10373.Contig1_All	1498	191	7.1071	133	5.1133	gi|224055575|ref|XP_002298547.1|	607.1	2e-172	predicted protein [Populus trichocarpa] >gi|222845805|gb|EEE83352.1| predicted protein [Populus trichocarpa]	gi|225316009|dbj|AK321963.1|	317	2e-83	Solanum lycopersicum cDNA, clone: LEFL1031CH04, HTC in leaf	sp|Q40784|AAPC_CENCI	405	3e-113	Putative glucose-6-phosphate 1-epimerase OS=Cenchrus ciliaris PE=2 SV=1
CL10373.Contig2_All	1245	14	0.6268	5	0.2313	gi|224055575|ref|XP_002298547.1|	607.1	2e-172	predicted protein [Populus trichocarpa] >gi|222845805|gb|EEE83352.1| predicted protein [Populus trichocarpa]	gi|225316009|dbj|AK321963.1|	317	2e-83	Solanum lycopersicum cDNA, clone: LEFL1031CH04, HTC in leaf	sp|Q40784|AAPC_CENCI	405	3e-113	Putative glucose-6-phosphate 1-epimerase OS=Cenchrus ciliaris PE=2 SV=1
CL10374.Contig1_All	1003	283	15.7274	400	22.9677	gi|224084028|ref|XP_002307200.1|	386.7	3e-106	predicted protein [Populus trichocarpa] >gi|118482335|gb|ABK93092.1| unknown [Populus trichocarpa] >gi|222856649|gb|EEE94196.1| predicted protein [Populus trichocarpa]	gi|156564445|gb|AC209100.1|	353	2e-94	Populus trichocarpa clone POP042-C19, complete sequence	sp|Q9LM69|ATL80_ARATH	191	4e-49	RING-H2 finger protein ATL80 OS=Arabidopsis thaliana GN=ATL80 PE=1 SV=1
CL10374.Contig2_All	453	31	3.8145	17	2.1613	gi|224084028|ref|XP_002307200.1|	205.3	2e-52	predicted protein [Populus trichocarpa] >gi|118482335|gb|ABK93092.1| unknown [Populus trichocarpa] >gi|222856649|gb|EEE94196.1| predicted protein [Populus trichocarpa]	gi|156564445|gb|AC209100.1|	323	9e-86	Populus trichocarpa clone POP042-C19, complete sequence	sp|Q9LM69|ATL80_ARATH	122	7e-29	RING-H2 finger protein ATL80 OS=Arabidopsis thaliana GN=ATL80 PE=1 SV=1
CL10375.Contig1_All	406	36	4.9425	22	3.1207	gi|224096276|ref|XP_002310597.1|	260.4	6e-69	predicted protein [Populus trichocarpa] >gi|222853500|gb|EEE91047.1| predicted protein [Populus trichocarpa]	gi|225438586|ref|XM_002276318.1|	103	1e-19	PREDICTED: Vitis vinifera probable inactive receptor kinase At5g10020-like (LOC100262709), mRNA	sp|Q0WR59|Y5020_ARATH	151	1e-37	Probable inactive receptor kinase At5g10020 OS=Arabidopsis thaliana GN=At5g10020 PE=1 SV=2
CL10375.Contig2_All	593	72	6.7678	67	6.507	gi|224083779|ref|XP_002307121.1|	368.6	3e-101	predicted protein [Populus trichocarpa] >gi|222856570|gb|EEE94117.1| predicted protein [Populus trichocarpa]	gi|225438586|ref|XM_002276318.1|	101	8e-19	PREDICTED: Vitis vinifera probable inactive receptor kinase At5g10020-like (LOC100262709), mRNA	sp|Q0WR59|Y5020_ARATH	178	2e-45	Probable inactive receptor kinase At5g10020 OS=Arabidopsis thaliana GN=At5g10020 PE=1 SV=2
CL10376.Contig1_All	210	36	9.5555	49	13.438	gi|302830306|ref|XP_002946719.1|	56.2	1e-07	hypothetical protein VOLCADRAFT_116153 [Volvox carteri f. nagariensis] >gi|300267763|gb|EFJ51945.1| hypothetical protein VOLCADRAFT_116153 [Volvox carteri f. nagariensis]	gi|224070506|ref|XM_002303125.1|	155	2e-35	Populus trichocarpa predicted protein, mRNA	sp|Q9T0K5|LRX3_ARATH	50.8	2e-07	Leucine-rich repeat extensin-like protein 3 OS=Arabidopsis thaliana GN=LRX3 PE=1 SV=1
CL10377.Contig1_All	278	14	2.8071	18	3.729	--	--	--	--	--	--	--	--	--	--	--	--
CL10378.Contig1_All	247	28	6.3188	42	9.7929	gi|224099533|ref|XP_002311521.1|	124	7e-28	predicted protein [Populus trichocarpa] >gi|222851341|gb|EEE88888.1| predicted protein [Populus trichocarpa]	gi|160959706|emb|CU227664.1|	278	2e-72	Populus EST from severe drought-stressed leaves	--	--	--	--
CL10378.Contig2_All	357	58	9.0559	60	9.6793	gi|224111466|ref|XP_002315865.1|	149.4	1e-35	predicted protein [Populus trichocarpa] >gi|222864905|gb|EEF02036.1| predicted protein [Populus trichocarpa]	gi|160959706|emb|CU227664.1|	692	0	Populus EST from severe drought-stressed leaves	--	--	--	--
CL10379.Contig1_All	238	4	0.9368	13	3.1458	gi|470143718|ref|XP_004307518.1|	59.7	1e-08	PREDICTED: actin-97-like [Fragaria vesca subsp. vesca]	gi|224137837|ref|XM_002322628.1|	335	1e-89	Populus trichocarpa actin 7 (ACT7), mRNA	sp|O65314|ACT_SCHDU	59.7	4e-10	Actin OS=Scherffelia dubia PE=2 SV=1
CL10379.Contig2_All	235	13	3.0835	3	0.7352	gi|470143718|ref|XP_004307518.1|	59.7	1e-08	PREDICTED: actin-97-like [Fragaria vesca subsp. vesca]	gi|301331527|gb|GQ988327.1|	460	1e-127	Populus tomentosa actin mRNA, complete cds	sp|O65314|ACT_SCHDU	59.7	4e-10	Actin OS=Scherffelia dubia PE=2 SV=1
CL1038.Contig1_All	794	338	23.7284	304	22.0502	gi|224056839|ref|XP_002299049.1|	164.9	1e-39	predicted protein [Populus trichocarpa] >gi|222846307|gb|EEE83854.1| predicted protein [Populus trichocarpa]	gi|224056838|ref|XM_002299013.1|	555	1e-155	Populus trichocarpa predicted protein, mRNA	--	--	--	--
CL1038.Contig2_All	892	180	11.2481	177	11.4279	gi|224056839|ref|XP_002299049.1|	171.4	1e-41	predicted protein [Populus trichocarpa] >gi|222846307|gb|EEE83854.1| predicted protein [Populus trichocarpa]	gi|224056838|ref|XM_002299013.1|	517	1e-144	Populus trichocarpa predicted protein, mRNA	--	--	--	--
CL10380.Contig1_All	424	28	3.681	10	1.3583	gi|224066515|ref|XP_002302118.1|	214.5	4e-55	predicted protein [Populus trichocarpa] >gi|222843844|gb|EEE81391.1| predicted protein [Populus trichocarpa]	gi|356536766|ref|XM_003536858.1|	58	8e-06	PREDICTED: Glycine max transcription factor TT8-like (LOC100807157), mRNA	--	--	--	--
CL10380.Contig2_All	350	9	1.4333	5	0.8227	gi|224066515|ref|XP_002302118.1|	155.2	2e-37	predicted protein [Populus trichocarpa] >gi|222843844|gb|EEE81391.1| predicted protein [Populus trichocarpa]	gi|356502812|ref|XM_003520162.1|	67.9	6e-09	PREDICTED: Glycine max transcription factor TT8-like (LOC100786815), mRNA	--	--	--	--
CL10381.Contig1_All	270	68	14.0384	63	13.438	gi|224132742|ref|XP_002321398.1|	150.6	7e-36	predicted protein [Populus trichocarpa] >gi|222868394|gb|EEF05525.1| predicted protein [Populus trichocarpa]	gi|160951494|emb|CU223797.1|	488	1e-135	Populus EST from leave	--	--	--	--
CL10381.Contig2_All	521	130	13.9084	132	14.5913	gi|224132742|ref|XP_002321398.1|	182.2	3e-45	predicted protein [Populus trichocarpa] >gi|222868394|gb|EEF05525.1| predicted protein [Populus trichocarpa]	gi|160952414|emb|CU224065.1|	741	0	Populus EST from leave	--	--	--	--
CL10382.Contig1_All	359	18	2.7948	24	3.8501	gi|224146029|ref|XP_002325853.1|	133.3	1e-30	predicted protein [Populus trichocarpa] >gi|222862728|gb|EEF00235.1| predicted protein [Populus trichocarpa]	gi|166091645|gb|AC216914.1|	266	1e-68	Populus trichocarpa clone POP036-E01, complete sequence	--	--	--	--
CL10382.Contig2_All	389	11	1.5762	14	2.0727	gi|224146029|ref|XP_002325853.1|	126.7	1e-28	predicted protein [Populus trichocarpa] >gi|222862728|gb|EEF00235.1| predicted protein [Populus trichocarpa]	gi|166091645|gb|AC216914.1|	309	1e-81	Populus trichocarpa clone POP036-E01, complete sequence	--	--	--	--
CL10383.Contig1_All	266	83	17.3927	66	14.2896	gi|224087718|ref|XP_002308211.1|	179.5	1e-44	predicted protein [Populus trichocarpa] >gi|222854187|gb|EEE91734.1| predicted protein [Populus trichocarpa]	gi|51557077|gb|AY712938.1|	83.8	8e-14	Hevea brasiliensis MYB transcription factor (MYB) gene, complete cds	--	--	--	--
CL10383.Contig2_All	1710	1469	47.8848	1366	46.0059	gi|224087718|ref|XP_002308211.1|	578.6	1e-163	predicted protein [Populus trichocarpa] >gi|222854187|gb|EEE91734.1| predicted protein [Populus trichocarpa]	gi|160958292|emb|CU232108.1|	357	2e-95	Populus EST from mild drought-stressed leaves	sp|Q8S9H7|DIV_ANTMA	352	3e-97	Transcription factor DIVARICATA OS=Antirrhinum majus GN=DIVARICATA PE=2 SV=1
CL10384.Contig1_All	392	18	2.5595	10	1.4692	--	--	--	--	--	--	--	--	--	--	--	--
CL10384.Contig2_All	471	20	2.3669	10	1.2228	--	--	--	--	--	--	--	--	--	--	--	--
CL10385.Contig1_All	369	230	34.7435	29	4.5262	gi|297740678|emb|CBI30860.3|	187.6	5e-47	unnamed protein product [Vitis vinifera]	gi|150171749|emb|CU406185.1|	141	6e-31	Oryza rufipogon (W1943) cDNA clone: ORW1943C108M24, full insert sequence	sp|P42036|RS143_ARATH	186	2e-48	40S ribosomal protein S14-3 OS=Arabidopsis thaliana GN=RPS14C PE=2 SV=2
CL10385.Contig2_All	292	0	0	16	3.1557	gi|298711478|emb|CBJ26566.1|	146.4	1e-34	40S ribosomal protein S14 [Ectocarpus siliculosus]	gi|301091062|ref|XM_002895678.1|	105	2e-20	Phytophthora infestans T30-4 40S ribosomal protein S14 (PITG_19999) mRNA, complete cds	sp|P42036|RS143_ARATH	140	2e-34	40S ribosomal protein S14-3 OS=Arabidopsis thaliana GN=RPS14C PE=2 SV=2
CL10385.Contig3_All	210	4	1.0617	7	1.9197	gi|298711478|emb|CBJ26566.1|	121.7	3e-27	40S ribosomal protein S14 [Ectocarpus siliculosus]	gi|460212820|gb|GABL01050565.1|	63.9	6e-08	TSA: Camelina sativa comp54564_c1_seq1 transcribed RNA sequence	sp|P19950|RS141_MAIZE	114	1e-26	40S ribosomal protein S14 OS=Zea mays PE=3 SV=1
CL10386.Contig1_All	282	11	2.1743	9	1.838	gi|224076832|ref|XP_002305013.1|	57.8	6e-08	predicted protein [Populus trichocarpa] >gi|222847977|gb|EEE85524.1| predicted protein [Populus trichocarpa]	gi|224076831|ref|XM_002304977.1|	418	1e-114	Populus trichocarpa predicted protein, mRNA	sp|Q84ZL0|FH5_ORYSJ	75.9	5e-15	Formin-like protein 5 OS=Oryza sativa subsp. japonica GN=FH5 PE=2 SV=2
CL10386.Contig2_All	743	42	3.1509	47	3.6431	gi|224116152|ref|XP_002317226.1|	469.5	2e-131	predicted protein [Populus trichocarpa] >gi|222860291|gb|EEE97838.1| predicted protein [Populus trichocarpa]	gi|224116151|ref|XM_002317190.1|	1255	0	Populus trichocarpa predicted protein, mRNA	sp|Q84ZL0|FH5_ORYSJ	140	1e-33	Formin-like protein 5 OS=Oryza sativa subsp. japonica GN=FH5 PE=2 SV=2
CL10387.Contig1_All	1708	583	19.0262	684	23.0636	gi|224087726|ref|XP_002308212.1|	951.8	0	predicted protein [Populus trichocarpa] >gi|222854188|gb|EEE91735.1| predicted protein [Populus trichocarpa]	gi|337730166|gb|JN127772.1|	182	8e-43	Theobroma cacao clone TCC_BC076K20, complete sequence	sp|Q9FF86|DCR_ARATH	231	7e-61	BAHD acyltransferase DCR OS=Arabidopsis thaliana GN=DCR PE=2 SV=1
CL10387.Contig2_All	1702	531	17.3903	653	22.096	gi|224087726|ref|XP_002308212.1|	908.3	0	predicted protein [Populus trichocarpa] >gi|222854188|gb|EEE91735.1| predicted protein [Populus trichocarpa]	gi|337730166|gb|JN127772.1|	180	3e-42	Theobroma cacao clone TCC_BC076K20, complete sequence	sp|Q9FF86|DCR_ARATH	234	9e-62	BAHD acyltransferase DCR OS=Arabidopsis thaliana GN=DCR PE=2 SV=1
CL10388.Contig1_All	387	10	1.4403	10	1.4882	gi|414587287|tpg|DAA37858.1|	227.6	4e-59	TPA: histone H3.2 [Zea mays]	gi|224075757|ref|XM_002304718.1|	509	1e-142	Populus trichocarpa histone H3 (HTR910), mRNA	sp|Q76MV0|H32_TOBAC	226	3e-60	Histone H3.2 OS=Nicotiana tabacum GN=B34 PE=1 SV=1
CL10388.Contig2_All	439	168	21.3313	420	55.099	gi|413918289|gb|AFW58221.1|	229.2	1e-59	histone H3.2 [Zea mays]	gi|224075757|ref|XM_002304718.1|	504	1e-140	Populus trichocarpa histone H3 (HTR910), mRNA	sp|Q76MV0|H32_TOBAC	226	4e-60	Histone H3.2 OS=Nicotiana tabacum GN=B34 PE=1 SV=1
CL10388.Contig3_All	406	56	7.6884	32	4.5392	gi|413918289|gb|AFW58221.1|	206.1	1e-52	histone H3.2 [Zea mays]	gi|7595793|gb|AF239930.1|AF239930	305	2e-80	Euphorbia esula histone H3 mRNA, complete cds	sp|Q76MV0|H32_TOBAC	203	3e-53	Histone H3.2 OS=Nicotiana tabacum GN=B34 PE=1 SV=1
CL10388.Contig4_All	249	85	19.0279	81	18.7346	gi|414878180|tpg|DAA55311.1|	122.1	2e-27	TPA: histone H3.2 [Zea mays]	gi|224161994|ref|XM_002338357.1|	180	4e-43	Populus trichocarpa histone H3 (HTR902), mRNA	sp|P68428|H32_WHEAT	117	2e-27	Histone H3.2 OS=Triticum aestivum PE=1 SV=2
CL10388.Contig5_All	372	215	32.2157	557	86.2326	gi|414587287|tpg|DAA37858.1|	204.5	4e-52	TPA: histone H3.2 [Zea mays]	gi|7595793|gb|AF239930.1|AF239930	305	2e-80	Euphorbia esula histone H3 mRNA, complete cds	sp|Q76MV0|H32_TOBAC	203	2e-53	Histone H3.2 OS=Nicotiana tabacum GN=B34 PE=1 SV=1
CL10389.Contig1_All	465	34	4.0757	28	3.4679	gi|224084757|ref|XP_002307401.1|	152.1	2e-36	predicted protein [Populus trichocarpa] >gi|118486303|gb|ABK94993.1| unknown [Populus trichocarpa] >gi|118488373|gb|ABK96004.1| unknown [Populus trichocarpa] >gi|222856850|gb|EEE94397.1| predicted protein [Populus trichocarpa]	gi|118488372|gb|EF148010.1|	593	1e-167	Populus trichocarpa clone WS0126_L09 unknown mRNA	--	--	--	--
CL10389.Contig2_All	283	23	4.5302	26	5.2911	gi|224063181|ref|XP_002301029.1|	151.8	3e-36	predicted protein [Populus trichocarpa] >gi|222842755|gb|EEE80302.1| predicted protein [Populus trichocarpa]	gi|224063180|ref|XM_002300993.1|	446	1e-123	Populus trichocarpa predicted protein, mRNA	--	--	--	--
CL1039.Contig1_All	615	90	8.1572	68	6.3679	gi|224066827|ref|XP_002302235.1|	206.1	3e-52	predicted protein [Populus trichocarpa] >gi|222843961|gb|EEE81508.1| predicted protein [Populus trichocarpa]	gi|123686835|emb|AM450414.1|	109	3e-21	Vitis vinifera, whole genome shotgun sequence, contig VV78X255013.14, clone ENTAV 115	--	--	--	--
CL1039.Contig2_All	1122	283	14.0593	350	17.9653	gi|224082294|ref|XP_002306636.1|	384	2e-105	predicted protein [Populus trichocarpa] >gi|222856085|gb|EEE93632.1| predicted protein [Populus trichocarpa]	gi|359492393|ref|XM_002285818.2|	95.6	1e-16	PREDICTED: Vitis vinifera uncharacterized LOC100260772 (LOC100260772), mRNA	--	--	--	--
CL10390.Contig1_All	1069	106	5.5271	104	5.6029	gi|224121158|ref|XP_002318513.1|	85.1	2e-15	predicted protein [Populus trichocarpa] >gi|222859186|gb|EEE96733.1| predicted protein [Populus trichocarpa]	gi|224121157|ref|XM_002318477.1|	418	1e-114	Populus trichocarpa predicted protein, mRNA	sp|P49964|SRP19_ORYSJ	57	2e-08	Signal recognition particle 19 kDa protein OS=Oryza sativa subsp. japonica GN=SRP19 PE=1 SV=1
CL10390.Contig2_All	811	103	7.0793	112	7.9535	gi|224121158|ref|XP_002318513.1|	272.7	4e-72	predicted protein [Populus trichocarpa] >gi|222859186|gb|EEE96733.1| predicted protein [Populus trichocarpa]	gi|359477559|ref|XM_002265213.2|	200	2e-48	PREDICTED: Vitis vinifera signal recognition particle 19 kDa protein-like (LOC100264739), mRNA	sp|Q943Z6|SRP19_ARATH	207	4e-54	Signal recognition particle 19 kDa protein OS=Arabidopsis thaliana GN=SRP19 PE=2 SV=1
CL10390.Contig3_All	251	55	12.2141	46	10.5546	--	--	--	--	gi|224133251|ref|XM_002321485.1|	385	1e-104	Populus trichocarpa predicted protein, mRNA	--	--	--	--
CL10390.Contig4_All	757	78	5.7434	70	5.3255	gi|224121158|ref|XP_002318513.1|	278.5	7e-74	predicted protein [Populus trichocarpa] >gi|222859186|gb|EEE96733.1| predicted protein [Populus trichocarpa]	gi|359477559|ref|XM_002265213.2|	210	2e-51	PREDICTED: Vitis vinifera signal recognition particle 19 kDa protein-like (LOC100264739), mRNA	sp|Q943Z6|SRP19_ARATH	206	9e-54	Signal recognition particle 19 kDa protein OS=Arabidopsis thaliana GN=SRP19 PE=2 SV=1
CL10391.Contig1_All	397	36	5.0546	20	2.9013	gi|224100883|ref|XP_002312051.1|	89	2e-17	predicted protein [Populus trichocarpa] >gi|222851871|gb|EEE89418.1| predicted protein [Populus trichocarpa]	gi|225448746|ref|XM_002281357.1|	61.9	5e-07	PREDICTED: Vitis vinifera uncharacterized LOC100260403 (LOC100260403), mRNA	sp|Q8L9Y2|ELP6_ARATH	55.8	7e-09	Elongator complex protein 6 OS=Arabidopsis thaliana GN=ELP6 PE=1 SV=1
CL10391.Contig2_All	875	91	5.797	81	5.3313	gi|224100883|ref|XP_002312051.1|	67.8	1e-100	predicted protein [Populus trichocarpa] >gi|222851871|gb|EEE89418.1| predicted protein [Populus trichocarpa]	gi|225448746|ref|XM_002281357.1|	111	1e-21	PREDICTED: Vitis vinifera uncharacterized LOC100260403 (LOC100260403), mRNA	sp|Q8L9Y2|ELP6_ARATH	189	6e-54	Elongator complex protein 6 OS=Arabidopsis thaliana GN=ELP6 PE=1 SV=1
CL10392.Contig1_All	310	17	3.0567	14	2.6009	--	--	--	--	--	--	--	--	--	--	--	--
CL10393.Contig1_All	269	10	2.0721	10	2.141	gi|224138208|ref|XP_002326545.1|	140.2	9e-33	jumonji domain protein [Populus trichocarpa] >gi|222833867|gb|EEE72344.1| jumonji domain protein [Populus trichocarpa]	gi|224138207|ref|XM_002326509.1|	232	1e-58	Populus trichocarpa jumonji domain protein (JMJ911), mRNA	--	--	--	--
CL10394.Contig1_All	1018	67	3.6686	41	2.3195	gi|224124838|ref|XP_002329961.1|	607.8	9e-173	predicted protein [Populus trichocarpa] >gi|222871983|gb|EEF09114.1| predicted protein [Populus trichocarpa]	gi|359495615|ref|XM_003634990.1|	486	1e-134	PREDICTED: Vitis vinifera 4-nitrophenylphosphatase-like, transcript variant 2 (LOC100243036), mRNA	--	--	--	--
CL10394.Contig2_All	622	12	1.0754	18	1.6666	gi|224124838|ref|XP_002329961.1|	273.9	1e-72	predicted protein [Populus trichocarpa] >gi|222871983|gb|EEF09114.1| predicted protein [Populus trichocarpa]	gi|157265589|gb|AC210129.1|	494	1e-137	Populus trichocarpa clone POP009-F11, complete sequence	--	--	--	--
CL10395.Contig1_All	523	70	7.4605	73	8.0386	--	--	--	--	--	--	--	--	--	--	--	--
CL10395.Contig2_All	474	65	7.6438	71	8.6266	--	--	--	--	gi|322875491|gb|HQ213948.1|	60	2e-06	Hordeum vulgare clone pHv-889 repeat region	--	--	--	--
CL10396.Contig1_All	372	30	4.4952	59	9.1342	gi|224099853|ref|XP_002311645.1|	204.1	5e-52	predicted protein [Populus trichocarpa] >gi|222851465|gb|EEE89012.1| predicted protein [Populus trichocarpa]	gi|160951562|emb|CU229204.1|	375	1e-101	Populus EST from mild drought-stressed leaves	sp|P24805|TSJT1_TOBAC	59.3	6e-10	Stem-specific protein TSJT1 OS=Nicotiana tabacum GN=TSJT1 PE=2 SV=1
CL10396.Contig2_All	1113	1202	60.1978	1820	94.175	gi|224111100|ref|XP_002315748.1|	499.6	4e-140	predicted protein [Populus trichocarpa] >gi|222864788|gb|EEF01919.1| predicted protein [Populus trichocarpa]	gi|160951562|emb|CU229204.1|	1257	0	Populus EST from mild drought-stressed leaves	sp|P24805|TSJT1_TOBAC	122	3e-28	Stem-specific protein TSJT1 OS=Nicotiana tabacum GN=TSJT1 PE=2 SV=1
CL10397.Contig1_All	233	21	5.0238	17	4.202	gi|429326494|gb|AFZ78587.1|	116.3	1e-25	cellulose synthase-like protein [Populus tomentosa]	gi|429326493|gb|JX986650.1|	325	1e-86	Populus tomentosa clone D4 cellulose synthase-like protein gene, complete cds	sp|Q9M9M4|CSLD3_ARATH	57	3e-09	Cellulose synthase-like protein D3 OS=Arabidopsis thaliana GN=CSLD3 PE=1 SV=1
CL10397.Contig2_All	251	12	2.6649	12	2.7534	gi|224138240|ref|XP_002326553.1|	99	2e-20	predicted protein [Populus trichocarpa] >gi|222833875|gb|EEE72352.1| predicted protein [Populus trichocarpa]	gi|357595463|gb|JN192360.1|	278	3e-72	Populus tomentosa clone ZDQSSR174 microsatellite sequence	sp|Q9M9M4|CSLD3_ARATH	57	2e-09	Cellulose synthase-like protein D3 OS=Arabidopsis thaliana GN=CSLD3 PE=1 SV=1
CL10398.Contig1_All	253	49	10.7956	59	13.4305	gi|357163432|ref|XP_003579729.1|	152.9	1e-36	PREDICTED: LOW QUALITY PROTEIN: histone H3.2-like [Brachypodium distachyon]	gi|156720294|dbj|AB331236.1|	210	5e-52	Nicotiana tabacum NthisH3.1 mRNA for histone H3.1, complete cds	sp|P68428|H32_WHEAT	152	3e-38	Histone H3.2 OS=Triticum aestivum PE=1 SV=2
CL10398.Contig2_All	791	484	34.1068	350	25.483	gi|296083584|emb|CBI23573.3|	268.9	6e-71	unnamed protein product [Vitis vinifera]	gi|224062042|ref|XM_002300690.1|	908	0	Populus trichocarpa histone H3 (HTR908), mRNA	sp|Q71H73|H33_VITVI	266	1e-71	Histone H3.3 OS=Vitis vinifera PE=2 SV=3
CL10398.Contig3_All	611	1101	100.442	957	90.2049	gi|296083584|emb|CBI23573.3|	268.9	4e-71	unnamed protein product [Vitis vinifera]	gi|160950421|emb|CU223272.1|	1027	0	Populus EST from leave	sp|Q71H73|H33_VITVI	266	9e-72	Histone H3.3 OS=Vitis vinifera PE=2 SV=3
CL10398.Contig4_All	579	4	0.3851	6	0.5968	gi|470105592|ref|XP_004289166.1|	147.1	1e-34	PREDICTED: histone H3.2-like [Fragaria vesca subsp. vesca]	gi|160957598|emb|CU231703.1|	400	1e-109	Populus EST from mild drought-stressed leaves	sp|Q76MV0|H32_TOBAC	152	1e-37	Histone H3.2 OS=Nicotiana tabacum GN=B34 PE=1 SV=1
CL10399.Contig1_All	1512	74	2.728	72	2.7425	gi|224099723|ref|XP_002311592.1|	653.3	0	predicted protein [Populus trichocarpa] >gi|222851412|gb|EEE88959.1| predicted protein [Populus trichocarpa]	gi|160951343|emb|CU223646.1|	682	0	Populus EST from leave	--	--	--	--
CL10399.Contig2_All	1321	62	2.6161	64	2.7902	gi|224099723|ref|XP_002311592.1|	653.3	0	predicted protein [Populus trichocarpa] >gi|222851412|gb|EEE88959.1| predicted protein [Populus trichocarpa]	gi|160951343|emb|CU223646.1|	682	0	Populus EST from leave	--	--	--	--
CL104.Contig1_All	251	17	3.7753	6	1.3767	gi|224130412|ref|XP_002328602.1|	156.8	9e-38	predicted protein [Populus trichocarpa] >gi|222838584|gb|EEE76949.1| predicted protein [Populus trichocarpa]	gi|160958876|emb|CU232377.1|	117	5e-24	Populus EST from mild drought-stressed leaves	sp|O49809|MFPA_BRANA	119	3e-28	Glyoxysomal fatty acid beta-oxidation multifunctional protein MFP-a OS=Brassica napus PE=2 SV=2
CL104.Contig2_All	2677	6188	128.847	5079	109.267	gi|224107106|ref|XP_002314377.1|	1416.8	0	predicted protein [Populus trichocarpa] >gi|222863417|gb|EEF00548.1| predicted protein [Populus trichocarpa]	gi|359477180|ref|XM_002270031.2|	1128	0	PREDICTED: Vitis vinifera glyoxysomal fatty acid beta-oxidation multifunctional protein MFP-a-like (LOC100244762), mRNA	sp|O49809|MFPA_BRANA	1174	0	Glyoxysomal fatty acid beta-oxidation multifunctional protein MFP-a OS=Brassica napus PE=2 SV=2
CL1040.Contig1_All	1033	72	3.8851	83	4.6274	gi|462401393|gb|EMJ06950.1|	384	2e-105	hypothetical protein PRUPE_ppa010237mg [Prunus persica]	gi|160952631|emb|CU229621.1|	535	1e-149	Populus EST from mild drought-stressed leaves	sp|Q9SEU4|SR33_ARATH	345	2e-95	Serine/arginine-rich splicing factor 33 OS=Arabidopsis thaliana GN=SR33 PE=1 SV=1
CL1040.Contig2_All	882	9	0.5688	5	0.3265	gi|255582554|ref|XP_002532060.1|	368.2	9e-101	serine/arginine rich splicing factor, putative [Ricinus communis] >gi|223528264|gb|EEF30315.1| serine/arginine rich splicing factor, putative [Ricinus communis]	gi|160952631|emb|CU229621.1|	535	1e-149	Populus EST from mild drought-stressed leaves	sp|Q9SEU4|SR33_ARATH	360	5e-100	Serine/arginine-rich splicing factor 33 OS=Arabidopsis thaliana GN=SR33 PE=1 SV=1
CL1040.Contig3_All	1093	1236	63.0333	1134	59.7519	gi|462401393|gb|EMJ06950.1|	380.6	2e-104	hypothetical protein PRUPE_ppa010237mg [Prunus persica]	gi|160952631|emb|CU229621.1|	331	9e-88	Populus EST from mild drought-stressed leaves	sp|Q9SEU4|SR33_ARATH	342	2e-94	Serine/arginine-rich splicing factor 33 OS=Arabidopsis thaliana GN=SR33 PE=1 SV=1
CL1040.Contig4_All	880	31	1.9636	10	0.6545	gi|255582554|ref|XP_002532060.1|	364.4	1e-99	serine/arginine rich splicing factor, putative [Ricinus communis] >gi|223528264|gb|EEF30315.1| serine/arginine rich splicing factor, putative [Ricinus communis]	gi|160952631|emb|CU229621.1|	511	1e-142	Populus EST from mild drought-stressed leaves	sp|Q9SEU4|SR33_ARATH	357	7e-99	Serine/arginine-rich splicing factor 33 OS=Arabidopsis thaliana GN=SR33 PE=1 SV=1
CL10400.Contig1_All	1032	229	12.3688	211	11.775	gi|224056547|ref|XP_002298904.1|	567.8	1e-160	predicted protein [Populus trichocarpa] >gi|222846162|gb|EEE83709.1| predicted protein [Populus trichocarpa]	gi|225461607|ref|XM_002282937.1|	232	6e-58	PREDICTED: Vitis vinifera protein IQ-DOMAIN 1-like (LOC100253850), mRNA	sp|Q9SF32|IQD1_ARATH	109	3e-24	Protein IQ-DOMAIN 1 OS=Arabidopsis thaliana GN=IQD1 PE=1 SV=1
CL10400.Contig2_All	477	53	6.1934	42	5.071	gi|224114559|ref|XP_002316795.1|	252.3	2e-66	predicted protein [Populus trichocarpa] >gi|222859860|gb|EEE97407.1| predicted protein [Populus trichocarpa]	gi|162809359|gb|AC215895.1|	333	1e-88	Populus trichocarpa clone POP017-L11, complete sequence	sp|Q9SF32|IQD1_ARATH	54.7	3e-08	Protein IQ-DOMAIN 1 OS=Arabidopsis thaliana GN=IQD1 PE=1 SV=1
CL10400.Contig3_All	249	20	4.4772	36	8.3265	gi|224056547|ref|XP_002298904.1|	119.4	1e-26	predicted protein [Populus trichocarpa] >gi|222846162|gb|EEE83709.1| predicted protein [Populus trichocarpa]	gi|162809359|gb|AC215895.1|	454	1e-125	Populus trichocarpa clone POP017-L11, complete sequence	--	--	--	--
CL10401.Contig1_All	204	20	5.4648	14	3.9524	gi|224059228|ref|XP_002299778.1|	149.4	1e-35	predicted protein [Populus trichocarpa] >gi|222847036|gb|EEE84583.1| predicted protein [Populus trichocarpa]	gi|156119647|gb|AC208478.1|	404	1e-110	Populus trichocarpa clone JGIACSB1081-D05, complete sequence	sp|Q9LUL4|SRF7_ARATH	50.1	3e-07	Protein STRUBBELIG-RECEPTOR FAMILY 7 OS=Arabidopsis thaliana GN=SRF7 PE=1 SV=1
CL10402.Contig1_All	692	239	19.2514	159	13.2328	gi|224139450|ref|XP_002323118.1|	250.8	1e-65	predicted protein [Populus trichocarpa] >gi|222867748|gb|EEF04879.1| predicted protein [Populus trichocarpa]	gi|157265589|gb|AC210129.1|	561	1e-157	Populus trichocarpa clone POP009-F11, complete sequence	--	--	--	--
CL10402.Contig2_All	297	42	7.8825	35	6.7869	--	--	--	--	gi|157265589|gb|AC210129.1|	131	4e-28	Populus trichocarpa clone POP009-F11, complete sequence	--	--	--	--
CL10403.Contig1_All	1146	416	20.2339	360	18.0916	gi|224141459|ref|XP_002324089.1|	633.3	2e-180	predicted protein [Populus trichocarpa] >gi|222867091|gb|EEF04222.1| predicted protein [Populus trichocarpa]	gi|470136986|ref|XM_004304214.1|	115	1e-22	PREDICTED: Fragaria vesca subsp. vesca probable ubiquitin conjugation factor E4-like (LOC101303727), mRNA	sp|Q9LF41|UBE4_ARATH	438	3e-123	Probable ubiquitin conjugation factor E4 OS=Arabidopsis thaliana GN=PUB1 PE=1 SV=1
CL10403.Contig2_All	348	129	20.6625	82	13.5704	gi|224077680|ref|XP_002305359.1|	232.3	1e-60	predicted protein [Populus trichocarpa] >gi|222848323|gb|EEE85870.1| predicted protein [Populus trichocarpa]	gi|449437815|ref|XM_004136638.1|	69.9	2e-09	PREDICTED: Cucumis sativus probable ubiquitin conjugation factor E4-like (LOC101211398), mRNA >gi|449494680|ref|XM_004159569.1| PREDICTED: Cucumis sativus probable ubiquitin conjugation factor E4-like (LOC101211398), mRNA	sp|Q9LF41|UBE4_ARATH	138	8e-34	Probable ubiquitin conjugation factor E4 OS=Arabidopsis thaliana GN=PUB1 PE=1 SV=1
CL10404.Contig1_All	1084	26	1.337	24	1.2751	gi|224141927|ref|XP_002324312.1|	562.8	3e-159	predicted protein [Populus trichocarpa] >gi|222865746|gb|EEF02877.1| predicted protein [Populus trichocarpa]	gi|115416125|emb|CT029410.1|	1423	0	Poplar cDNA sequences	--	--	--	--
CL10404.Contig2_All	1597	170	5.9336	293	10.5663	gi|224141927|ref|XP_002324312.1|	562.8	6e-159	predicted protein [Populus trichocarpa] >gi|222865746|gb|EEF02877.1| predicted protein [Populus trichocarpa]	gi|115416125|emb|CT029410.1|	1382	0	Poplar cDNA sequences	sp|Q9FZP1|HPSE3_ARATH	306	2e-83	Heparanase-like protein 3 OS=Arabidopsis thaliana GN=At5g34940 PE=2 SV=2
CL10405.Contig1_All	2162	639	16.4747	514	13.692	gi|255569177|ref|XP_002525557.1|	864	0	conserved hypothetical protein [Ricinus communis] >gi|223535136|gb|EEF36816.1| conserved hypothetical protein [Ricinus communis]	gi|225435918|ref|XM_002267154.1|	109	1e-20	PREDICTED: Vitis vinifera uncharacterized LOC100249621 (LOC100249621), mRNA	--	--	--	--
CL10405.Contig2_All	954	211	12.3284	188	11.3493	gi|255569177|ref|XP_002525557.1|	343.2	3e-93	conserved hypothetical protein [Ricinus communis] >gi|223535136|gb|EEF36816.1| conserved hypothetical protein [Ricinus communis]	gi|189163035|dbj|AP010269.1|	63.9	3e-07	Lotus japonicus genomic DNA, chromosome 3, clone: LjT33A07, TM0672, complete sequence	--	--	--	--
CL10405.Contig3_All	665	208	17.4347	171	14.8093	gi|224057214|ref|XP_002299176.1|	328.9	3e-89	predicted protein [Populus trichocarpa] >gi|222846434|gb|EEE83981.1| predicted protein [Populus trichocarpa]	gi|189163035|dbj|AP010269.1|	75.8	5e-11	Lotus japonicus genomic DNA, chromosome 3, clone: LjT33A07, TM0672, complete sequence	--	--	--	--
CL10406.Contig1_All	2667	1022	21.3599	1040	22.4579	gi|224133550|ref|XP_002321602.1|	1357.8	0	anion exchanger family protein [Populus trichocarpa] >gi|222868598|gb|EEF05729.1| anion exchanger family protein [Populus trichocarpa]	gi|224133549|ref|XM_002321566.1|	3931	0	Populus trichocarpa anion exchanger family protein, mRNA	sp|Q9M1P7|BOR2_ARATH	1108	0	Probable boron transporter 2 OS=Arabidopsis thaliana GN=BOR2 PE=2 SV=1
CL10407.Contig1_All	351	30	4.7642	9	1.4767	gi|255542648|ref|XP_002512387.1|	117.1	8e-26	DNA polymerase zeta catalytic subunit, putative [Ricinus communis] >gi|223548348|gb|EEF49839.1| DNA polymerase zeta catalytic subunit, putative [Ricinus communis]	gi|156523307|gb|AC209036.1|	642	0	Populus trichocarpa clone POP004-K05, complete sequence	--	--	--	--
CL10407.Contig2_All	209	6	1.6002	7	1.9289	gi|224131536|ref|XP_002328564.1|	117.1	8e-26	predicted protein [Populus trichocarpa] >gi|222838279|gb|EEE76644.1| predicted protein [Populus trichocarpa]	gi|156523307|gb|AC209036.1|	190	4e-46	Populus trichocarpa clone POP004-K05, complete sequence	--	--	--	--
CL10408.Contig1_All	229	22	5.355	12	3.0179	--	--	--	--	--	--	--	--	--	--	--	--
CL10409.Contig1_All	241	14	3.238	5	1.1948	gi|224116474|ref|XP_002331906.1|	127.9	4e-29	predicted protein [Populus trichocarpa] >gi|222874578|gb|EEF11709.1| predicted protein [Populus trichocarpa]	gi|158749691|gb|AC213421.1|	412	1e-113	Populus trichocarpa clone POP033-L19, complete sequence	sp|Q9LFR1|PTR50_ARATH	97.8	1e-21	Probable peptide/nitrate transporter At5g14940 OS=Arabidopsis thaliana GN=At5g14940 PE=2 SV=1
CL10409.Contig2_All	204	7	1.9127	10	2.8231	gi|224116474|ref|XP_002331906.1|	137.9	4e-32	predicted protein [Populus trichocarpa] >gi|222874578|gb|EEF11709.1| predicted protein [Populus trichocarpa]	gi|158749691|gb|AC213421.1|	349	7e-94	Populus trichocarpa clone POP033-L19, complete sequence	sp|Q9LFR1|PTR50_ARATH	105	6e-24	Probable peptide/nitrate transporter At5g14940 OS=Arabidopsis thaliana GN=At5g14940 PE=2 SV=1
CL1041.Contig1_All	245	12	2.7302	12	2.8208	gi|397626501|gb|EJK68157.1|	72.8	1e-12	hypothetical protein THAOC_10688, partial [Thalassiosira oceanica]	--	--	--	--	sp|Q9SN46|LRX5_ARATH	53.5	3e-08	Leucine-rich repeat extensin-like protein 5 OS=Arabidopsis thaliana GN=LRX5 PE=2 SV=2
CL1041.Contig2_All	351	0	0	0	0	gi|397626501|gb|EJK68157.1|	72.8	1e-12	hypothetical protein THAOC_10688, partial [Thalassiosira oceanica]	--	--	--	--	sp|Q9SN46|LRX5_ARATH	62.8	4e-11	Leucine-rich repeat extensin-like protein 5 OS=Arabidopsis thaliana GN=LRX5 PE=2 SV=2
CL1041.Contig3_All	245	0	0	0	0	gi|397626501|gb|EJK68157.1|	67.8	6e-11	hypothetical protein THAOC_10688, partial [Thalassiosira oceanica]	--	--	--	--	sp|Q9LK03|PERK2_ARATH	55.5	7e-09	Proline-rich receptor-like protein kinase PERK2 OS=Arabidopsis thaliana GN=PERK2 PE=2 SV=3
CL1041.Contig4_All	446	10	1.2498	15	1.9369	gi|397626501|gb|EJK68157.1|	123.6	9e-28	hypothetical protein THAOC_10688, partial [Thalassiosira oceanica]	--	--	--	--	sp|O80560|IP5PC_ARATH	82.8	7e-17	Type I inositol 1,4,5-trisphosphate 5-phosphatase 12 OS=Arabidopsis thaliana GN=5PTASE12 PE=1 SV=1
CL10410.Contig1_All	594	454	42.6031	373	36.1644	gi|224111848|ref|XP_002332874.1|	76.6	2e-13	predicted protein [Populus trichocarpa] >gi|222836204|gb|EEE74625.1| predicted protein [Populus trichocarpa]	gi|165905719|gb|AC216688.1|	159	4e-36	Populus trichocarpa clone POP098-A10, complete sequence	--	--	--	--
CL10410.Contig2_All	472	228	26.9255	174	21.2308	gi|224111848|ref|XP_002332874.1|	97.1	1e-19	predicted protein [Populus trichocarpa] >gi|222836204|gb|EEE74625.1| predicted protein [Populus trichocarpa]	gi|165905719|gb|AC216688.1|	254	7e-65	Populus trichocarpa clone POP098-A10, complete sequence	--	--	--	--
CL10411.Contig1_All	1415	239	9.4148	114	4.6399	gi|219117437|ref|XP_002179513.1|	57	9e-07	predicted protein [Phaeodactylum tricornutum CCAP 1055/1] >gi|217409404|gb|EEC49336.1| predicted protein [Phaeodactylum tricornutum CCAP 1055/1]	--	--	--	--	--	--	--	--
CL10412.Contig1_All	1065	147	7.6938	141	7.6248	gi|224059034|ref|XP_002299685.1|	374.8	1e-102	heavy metal ATPase [Populus trichocarpa] >gi|222846943|gb|EEE84490.1| heavy metal ATPase [Populus trichocarpa]	gi|160953914|emb|CU224769.1|	1564	0	Populus EST from leave	sp|Q9SZC9|HMA6_ARATH	281	6e-76	Copper-transporting ATPase PAA1, chloroplastic OS=Arabidopsis thaliana GN=PAA1 PE=2 SV=1
CL10412.Contig2_All	251	48	10.6596	48	11.0135	--	--	--	--	--	--	--	--	--	--	--	--
CL10413.Contig1_All	836	203	13.5351	229	15.7757	gi|255567754|ref|XP_002524855.1|	158.3	1e-37	ATP binding protein, putative [Ricinus communis] >gi|223535818|gb|EEF37479.1| ATP binding protein, putative [Ricinus communis]	gi|156071540|gb|AC208315.1|	702	0	Populus trichocarpa clone JGIACSB17-L15, complete sequence	sp|Q9SZ67|WRK19_ARATH	62.8	2e-10	Probable WRKY transcription factor 19 OS=Arabidopsis thaliana GN=WRKY19 PE=2 SV=1
CL10414.Contig1_All	267	51	10.6471	39	8.4123	gi|224112269|ref|XP_002332801.1|	113.2	1e-24	predicted protein [Populus trichocarpa] >gi|222834236|gb|EEE72713.1| predicted protein [Populus trichocarpa]	gi|157265599|gb|AC210139.1|	442	1e-122	Populus trichocarpa clone POP113-I04, complete sequence	--	--	--	--
CL10414.Contig2_All	541	45	4.6365	28	2.9807	gi|224112269|ref|XP_002332801.1|	191.8	4e-48	predicted protein [Populus trichocarpa] >gi|222834236|gb|EEE72713.1| predicted protein [Populus trichocarpa]	gi|157265599|gb|AC210139.1|	436	1e-119	Populus trichocarpa clone POP113-I04, complete sequence	sp|B9DGI8|BZP63_ARATH	59.3	1e-09	Basic leucine zipper 63 OS=Arabidopsis thaliana GN=BZIP63 PE=1 SV=1
CL10417.Contig1_All	516	164	17.716	170	18.974	gi|224079253|ref|XP_002305810.1|	79	4e-14	predicted protein [Populus trichocarpa] >gi|222848774|gb|EEE86321.1| predicted protein [Populus trichocarpa]	gi|114158738|gb|AC182699.2|	872	0	Populus trichocarpa clone Pop1-72K24, complete sequence	--	--	--	--
CL10417.Contig2_All	290	41	7.8806	87	17.2775	--	--	--	--	gi|114158738|gb|AC182699.2|	396	1e-108	Populus trichocarpa clone Pop1-72K24, complete sequence	--	--	--	--
CL10418.Contig1_All	1851	438	13.1898	411	12.7878	gi|118484400|gb|ABK94077.1|	659.1	0	unknown [Populus trichocarpa]	gi|359484450|ref|XM_002280177.2|	656	0	PREDICTED: Vitis vinifera protein bem46-like (LOC100245712), mRNA	--	--	--	--
CL10418.Contig2_All	1427	287	11.2106	203	8.1928	gi|118484400|gb|ABK94077.1|	609.8	3e-173	unknown [Populus trichocarpa]	gi|359484450|ref|XM_002280177.2|	640	0	PREDICTED: Vitis vinifera protein bem46-like (LOC100245712), mRNA	--	--	--	--
CL10419.Contig1_All	403	20	2.7663	36	5.1447	gi|224068498|ref|XP_002302758.1|	251.1	3e-66	predicted protein [Populus trichocarpa] >gi|222844484|gb|EEE82031.1| predicted protein [Populus trichocarpa]	gi|78482948|emb|AM117813.1|	505	1e-140	Populus tremula x Populus alba mRNA for beta (1,4)-xylosidase (BXL2 gene)	sp|Q94KD8|BXL2_ARATH	184	1e-47	Probable beta-D-xylosidase 2 OS=Arabidopsis thaliana GN=BXL2 PE=2 SV=1
CL10419.Contig2_All	1155	171	8.2525	158	7.8783	gi|224128360|ref|XP_002320310.1|	670.6	0	predicted protein [Populus trichocarpa] >gi|222861083|gb|EEE98625.1| predicted protein [Populus trichocarpa]	gi|78482948|emb|AM117813.1|	783	0	Populus tremula x Populus alba mRNA for beta (1,4)-xylosidase (BXL2 gene)	sp|Q94KD8|BXL2_ARATH	492	1e-139	Probable beta-D-xylosidase 2 OS=Arabidopsis thaliana GN=BXL2 PE=2 SV=1
CL1042.Contig1_All	1789	649	20.2212	547	17.6091	gi|224092702|ref|XP_002309704.1|	965.7	0	nbs-lrr resistance protein [Populus trichocarpa] >gi|222855680|gb|EEE93227.1| nbs-lrr resistance protein [Populus trichocarpa]	gi|156616413|gb|AC209188.1|	2224	0	Populus trichocarpa clone POP073-O22, complete sequence	sp|Q7XBQ9|RGA2_SOLBU	213	4e-55	Disease resistance protein RGA2 OS=Solanum bulbocastanum GN=RGA2 PE=1 SV=1
CL1042.Contig2_All	3159	1536	27.1027	1378	25.1223	gi|224092698|ref|XP_002309702.1|	1649.8	0	cc-nbs-lrr resistance protein [Populus trichocarpa] >gi|222855678|gb|EEE93225.1| cc-nbs-lrr resistance protein [Populus trichocarpa]	gi|224121271|ref|XM_002330750.1|	2981	0	Populus trichocarpa cc-nbs-lrr resistance protein, mRNA	sp|Q7XBQ9|RGA2_SOLBU	396	3e-110	Disease resistance protein RGA2 OS=Solanum bulbocastanum GN=RGA2 PE=1 SV=1
CL10420.Contig1_All	425	54	7.0823	41	5.5559	--	--	--	--	gi|160951153|emb|CU223403.1|	361	4e-97	Populus EST from leave	--	--	--	--
CL10420.Contig2_All	795	1470	103.067	1751	126.846	gi|224131676|ref|XP_002321150.1|	211.5	1e-53	predicted protein [Populus trichocarpa] >gi|222861923|gb|EEE99465.1| predicted protein [Populus trichocarpa]	gi|160961425|emb|CU233410.1|	1015	0	Populus EST from severe drought-stressed opposite wood	sp|P55852|SUMO1_ARATH	172	3e-43	Small ubiquitin-related modifier 1 OS=Arabidopsis thaliana GN=SUMO1 PE=1 SV=2
CL10420.Contig3_All	737	1012	76.5393	1780	139.095	gi|224131676|ref|XP_002321150.1|	209.9	3e-53	predicted protein [Populus trichocarpa] >gi|222861923|gb|EEE99465.1| predicted protein [Populus trichocarpa]	gi|160961425|emb|CU233410.1|	833	0	Populus EST from severe drought-stressed opposite wood	sp|P55852|SUMO1_ARATH	172	2e-43	Small ubiquitin-related modifier 1 OS=Arabidopsis thaliana GN=SUMO1 PE=1 SV=2
CL10421.Contig1_All	221	25	6.3055	21	5.4725	gi|224053553|ref|XP_002297869.1|	65.1	3e-10	predicted protein [Populus trichocarpa] >gi|222845127|gb|EEE82674.1| predicted protein [Populus trichocarpa]	gi|224053552|ref|XM_002297833.1|	67.9	4e-09	Populus trichocarpa predicted protein, mRNA	--	--	--	--
CL10422.Contig1_All	1030	500	27.0585	532	29.7463	gi|83271027|gb|ABC00187.1|	566.2	3e-160	chloroplast glyceraldehyde-3-phosphate dehydrogenase [Dunaliella viridis] >gi|83271029|gb|ABC00188.1| chloroplast glyceraldehyde-3-phosphate dehydrogenase [Dunaliella viridis]	gi|159463281|ref|XM_001689819.1|	841	0	Chlamydomonas reinhardtii glyceraldehyde-3-phosphate dehydrogenase (GAP3) mRNA, complete cds	sp|P50362|G3PA_CHLRE	530	5e-151	Glyceraldehyde-3-phosphate dehydrogenase A, chloroplastic OS=Chlamydomonas reinhardtii GN=GAPA PE=1 SV=1
CL10422.Contig2_All	1245	208	9.3125	618	28.5876	gi|83271027|gb|ABC00187.1|	647.9	0	chloroplast glyceraldehyde-3-phosphate dehydrogenase [Dunaliella viridis] >gi|83271029|gb|ABC00188.1| chloroplast glyceraldehyde-3-phosphate dehydrogenase [Dunaliella viridis]	gi|159463281|ref|XM_001689819.1|	1013	0	Chlamydomonas reinhardtii glyceraldehyde-3-phosphate dehydrogenase (GAP3) mRNA, complete cds	sp|P50362|G3PA_CHLRE	608	2e-174	Glyceraldehyde-3-phosphate dehydrogenase A, chloroplastic OS=Chlamydomonas reinhardtii GN=GAPA PE=1 SV=1
CL10423.Contig1_All	871	70	4.4797	93	6.1493	gi|159470915|ref|XP_001693602.1|	275	1e-72	glutaredoxin/malate transporter fusion protein [Chlamydomonas reinhardtii] >gi|158283105|gb|EDP08856.1| glutaredoxin/malate transporter fusion protein [Chlamydomonas reinhardtii]	--	--	--	--	sp|Q9ASQ7|SLAH2_ARATH	76.6	2e-14	S-type anion channel SLAH2 OS=Arabidopsis thaliana GN=SLAH2 PE=2 SV=1
CL10424.Contig1_All	761	268	19.6301	397	30.0445	gi|224141775|ref|XP_002324240.1|	152.1	8e-36	predicted protein [Populus trichocarpa] >gi|222865674|gb|EEF02805.1| predicted protein [Populus trichocarpa]	gi|160950174|emb|CU228944.1|	870	0	Populus EST from severe drought-stressed leaves	sp|Q94KR7|IF1C_SOYBN	135	2e-32	Translation initiation factor IF-1, chloroplastic OS=Glycine max GN=infA PE=2 SV=1
CL10424.Contig2_All	695	837	67.1293	766	63.4751	gi|224141775|ref|XP_002324240.1|	152.1	7e-36	predicted protein [Populus trichocarpa] >gi|222865674|gb|EEF02805.1| predicted protein [Populus trichocarpa]	gi|160955132|emb|CU225347.1|	1007	0	Populus EST from leave	sp|Q94KR7|IF1C_SOYBN	135	2e-32	Translation initiation factor IF-1, chloroplastic OS=Glycine max GN=infA PE=2 SV=1
CL10425.Contig1_All	743	705	52.8898	854	66.1955	gi|224096940|ref|XP_002310794.1|	409.1	3e-113	predicted protein [Populus trichocarpa] >gi|222853697|gb|EEE91244.1| predicted protein [Populus trichocarpa]	gi|297802281|ref|XM_002868979.1|	230	2e-57	Arabidopsis lyrata subsp. lyrata minor allergen, mRNA	--	--	--	--
CL10425.Contig2_All	878	847	53.7725	881	57.7884	gi|224133864|ref|XP_002327699.1|	509.6	2e-143	predicted protein [Populus trichocarpa] >gi|222836784|gb|EEE75177.1| predicted protein [Populus trichocarpa]	gi|449451498|ref|XM_004143451.1|	268	9e-69	PREDICTED: Cucumis sativus flavoprotein-like protein YCP4-like (LOC101216659), mRNA	--	--	--	--
CL10426.Contig1_All	959	266	15.4609	231	13.8724	gi|224103619|ref|XP_002313125.1|	503.4	2e-141	trans-caffeoyl-coa 3-o-methyltransferase [Populus trichocarpa] >gi|30580333|sp|O65862.1|CAMT1_POPTR RecName: Full=Caffeoyl-CoA O-methyltransferase 1; AltName: Full=Trans-caffeoyl-CoA 3-O-methyltransferase 1; Short=CCoAMT-1; Short=CCoAOMT-1 >gi|2960356|emb|CAA12198.1| caffeoyl-CoA 3-O-methyltransferase [Populus trichocarpa] >gi|3334838|emb|CAA11496.1| caffeoyl CoA 3-O-methyltransferase [Populus tr…	gi|857577|gb|U27116.1|PTU27116	1737	0	Populus tremuloides caffeoyl-CoA 3-O-methyltransferase mRNA, complete cds	sp|O65862|CAMT1_POPTR	503	6e-143	Caffeoyl-CoA O-methyltransferase 1 OS=Populus trichocarpa GN=CCOAOMT1 PE=2 SV=1
CL10426.Contig2_All	1058	1234	65.0131	1199	65.2669	gi|429326416|gb|AFZ78548.1|	500	2e-140	caffeoyl-CoA O-methyltransferase [Populus tomentosa]	gi|224056109|ref|XM_002298693.1|	1869	0	Populus trichocarpa trans-caffeoyl-coa 3-o-methyltransferase (CAM2), mRNA	sp|O65922|CAMT2_POPTR	493	8e-140	Caffeoyl-CoA O-methyltransferase 2 OS=Populus trichocarpa GN=CCOAOMT2 PE=2 SV=1
CL10426.Contig3_All	1075	119	6.1704	142	7.6074	gi|3023436|sp|Q43095.1|CAMT_POPTM	498	1e-139	RecName: Full=Caffeoyl-CoA O-methyltransferase; AltName: Full=Trans-caffeoyl-CoA 3-O-methyltransferase; Short=CCoAMT; Short=CCoAOMT >gi|857578|gb|AAA80651.1| caffeoyl-CoA 3-O-methyltransferase [Populus tremuloides]	gi|857577|gb|U27116.1|PTU27116	1669	0	Populus tremuloides caffeoyl-CoA 3-O-methyltransferase mRNA, complete cds	sp|Q43095|CAMT_POPTM	498	3e-141	Caffeoyl-CoA O-methyltransferase OS=Populus tremuloides PE=2 SV=1
CL10427.Contig1_All	752	185	13.7128	168	12.8662	gi|94503776|gb|ABF29697.1|	176	5e-43	late embryogenesis abundant protein 5 [Populus suaveolens]	gi|94503775|gb|DQ487101.1|	817	0	Populus suaveolens late embryogenesis abundant protein 5 (LEA5) mRNA, complete cds	sp|P32292|ARG2_VIGRR	80.5	9e-16	Indole-3-acetic acid-induced protein ARG2 OS=Vigna radiata var. radiata GN=ARG2 PE=2 SV=1
CL10427.Contig2_All	771	445	32.1719	588	43.922	gi|94503776|gb|ABF29697.1|	176	5e-43	late embryogenesis abundant protein 5 [Populus suaveolens]	gi|94503775|gb|DQ487101.1|	914	0	Populus suaveolens late embryogenesis abundant protein 5 (LEA5) mRNA, complete cds	sp|P32292|ARG2_VIGRR	80.5	1e-15	Indole-3-acetic acid-induced protein ARG2 OS=Vigna radiata var. radiata GN=ARG2 PE=2 SV=1
CL10428.Contig1_All	265	24	5.0482	26	5.6505	gi|224120234|ref|XP_002318279.1|	178.3	3e-44	predicted protein [Populus trichocarpa] >gi|222858952|gb|EEE96499.1| predicted protein [Populus trichocarpa]	gi|284449852|emb|FN662482.1|	139	2e-30	Citrus clementina mRNA for nucleotide-sensitive chloride conductance regulator (icln1 gene), clone IC0AAA3AA07RM1	sp|Q9LVA7|ICLN_ARATH	137	1e-33	Chloride conductance regulatory protein ICln OS=Arabidopsis thaliana GN=At5g62290 PE=2 SV=1
CL10428.Contig2_All	576	154	14.9029	185	18.4973	gi|224136778|ref|XP_002322413.1|	344.4	6e-94	predicted protein [Populus trichocarpa] >gi|222869409|gb|EEF06540.1| predicted protein [Populus trichocarpa]	gi|284449852|emb|FN662482.1|	131	9e-28	Citrus clementina mRNA for nucleotide-sensitive chloride conductance regulator (icln1 gene), clone IC0AAA3AA07RM1	sp|Q9LVA7|ICLN_ARATH	242	1e-64	Chloride conductance regulatory protein ICln OS=Arabidopsis thaliana GN=At5g62290 PE=2 SV=1
CL10429.Contig1_All	479	47	5.4693	39	4.6891	--	--	--	--	--	--	--	--	--	--	--	--
CL10429.Contig2_All	276	9	1.8176	3	0.626	--	--	--	--	--	--	--	--	--	--	--	--
CL1043.Contig1_All	1731	256	8.2436	214	7.1199	gi|224055146|ref|XP_002298424.1|	131	0	predicted protein [Populus trichocarpa] >gi|222845682|gb|EEE83229.1| predicted protein [Populus trichocarpa]	gi|470143083|ref|XM_004307167.1|	151	3e-33	PREDICTED: Fragaria vesca subsp. vesca uncharacterized LOC101290897 (LOC101290897), mRNA	--	--	--	--
CL1043.Contig2_All	340	71	11.6399	58	9.8245	gi|224106097|ref|XP_002314042.1|	223.4	8e-58	predicted protein [Populus trichocarpa] >gi|222850450|gb|EEE87997.1| predicted protein [Populus trichocarpa]	gi|224106096|ref|XM_002314006.1|	648	0	Populus trichocarpa predicted protein, mRNA	--	--	--	--
CL1043.Contig3_All	1721	232	7.5141	234	7.8306	gi|224055146|ref|XP_002298424.1|	53.1	0	predicted protein [Populus trichocarpa] >gi|222845682|gb|EEE83229.1| predicted protein [Populus trichocarpa]	gi|470143083|ref|XM_004307167.1|	127	4e-26	PREDICTED: Fragaria vesca subsp. vesca uncharacterized LOC101290897 (LOC101290897), mRNA	--	--	--	--
CL1043.Contig4_All	901	147	9.0942	96	6.1363	gi|224106097|ref|XP_002314042.1|	563.1	2e-159	predicted protein [Populus trichocarpa] >gi|222850450|gb|EEE87997.1| predicted protein [Populus trichocarpa]	gi|29122781|dbj|AP006144.1|	69.9	4e-09	Lotus japonicus genomic DNA, chromosome 3, clone: LjT23P21, TM0261, complete sequence	--	--	--	--
CL10430.Contig1_All	580	49	4.7091	67	6.6528	gi|81593|pir||S18750	321.2	6e-87	chitinase (EC 3.2.1.14) precursor - western balsam poplar x cottonwood	gi|169446|gb|M25336.1|POPCHIA	737	0	Populus x generosa clone win6d. chitinase (CHI) mRNA, partial cds	sp|P16579|CHI6_POPTR	319	8e-88	Acidic endochitinase WIN6 OS=Populus trichocarpa GN=WIN6 PE=2 SV=2
CL10431.Contig1_All	455	40	4.9003	28	3.5441	gi|224060379|ref|XP_002300170.1|	307.4	4e-83	predicted protein [Populus trichocarpa] >gi|222847428|gb|EEE84975.1| predicted protein [Populus trichocarpa]	gi|147805664|emb|AM439355.2|	137	1e-29	Vitis vinifera contig VV78X136610.16, whole genome shotgun sequence	sp|Q8W4N3|UBP2_ARATH	166	4e-42	Ubiquitin carboxyl-terminal hydrolase 2 OS=Arabidopsis thaliana GN=UBP2 PE=1 SV=2
CL10432.Contig1_All	908	135	8.2874	161	10.2117	gi|224135859|ref|XP_002322178.1|	436.8	2e-121	predicted protein [Populus trichocarpa] >gi|222869174|gb|EEF06305.1| predicted protein [Populus trichocarpa]	gi|224135858|ref|XM_002322142.1|	1273	0	Populus trichocarpa predicted protein, mRNA	sp|Q9SR77|HBPL1_ARATH	53.5	2e-07	Heme-binding-like protein At3g10130, chloroplastic OS=Arabidopsis thaliana GN=At3g10130 PE=1 SV=1
CL10432.Contig2_All	891	185	11.5735	118	7.6272	gi|224135859|ref|XP_002322178.1|	436.8	2e-121	predicted protein [Populus trichocarpa] >gi|222869174|gb|EEF06305.1| predicted protein [Populus trichocarpa]	gi|224135858|ref|XM_002322142.1|	1287	0	Populus trichocarpa predicted protein, mRNA	sp|Q9SR77|HBPL1_ARATH	53.5	2e-07	Heme-binding-like protein At3g10130, chloroplastic OS=Arabidopsis thaliana GN=At3g10130 PE=1 SV=1
CL10433.Contig1_All	698	85	6.7879	70	5.7757	gi|28193496|emb|CAD28610.1|	253.1	3e-66	60S ribosomal protein L13 [Polytomella sp. Pringsheim 198.80]	gi|2662187|dbj|AB009086.1|	99.6	4e-18	Chlamydomonas sp. W80 mRNA for BBC1 protein, complete cds	sp|O48513|RL13_CHLSW	243	7e-65	60S ribosomal protein L13 OS=Chlamydomonas sp. (strain W80) GN=RPL13 PE=2 SV=1
CL10433.Contig2_All	667	79	6.602	50	4.3172	gi|6831610|sp|O48513.1|RL13_CHLSW	285	6e-76	RecName: Full=60S ribosomal protein L13; AltName: Full=BBC1 protein homolog >gi|2662188|dbj|BAA23724.1| BBC1 protein [Chlamydomonas sp. W80]	gi|2662187|dbj|AB009086.1|	119	4e-24	Chlamydomonas sp. W80 mRNA for BBC1 protein, complete cds	sp|O48513|RL13_CHLSW	285	2e-77	60S ribosomal protein L13 OS=Chlamydomonas sp. (strain W80) GN=RPL13 PE=2 SV=1
CL10434.Contig1_All	220	5	1.2668	4	1.0471	gi|224122266|ref|XP_002318792.1|	63.9	8e-10	predicted protein [Populus trichocarpa] >gi|222859465|gb|EEE97012.1| predicted protein [Populus trichocarpa]	gi|157365036|gb|AC210385.1|	278	2e-72	Populus trichocarpa clone POP037-E20, complete sequence	--	--	--	--
CL10434.Contig2_All	206	19	5.1411	2	0.5591	gi|224122266|ref|XP_002318792.1|	63.9	8e-10	predicted protein [Populus trichocarpa] >gi|222859465|gb|EEE97012.1| predicted protein [Populus trichocarpa]	gi|157365036|gb|AC210385.1|	373	1e-101	Populus trichocarpa clone POP037-E20, complete sequence	--	--	--	--
CL10435.Contig1_All	472	134	15.8247	140	17.0823	gi|224097128|ref|XP_002310843.1|	159.8	1e-38	predicted protein [Populus trichocarpa] >gi|222853746|gb|EEE91293.1| predicted protein [Populus trichocarpa]	gi|359476843|ref|XM_003631850.1|	83.8	1e-13	PREDICTED: Vitis vinifera probable serine protease EDA2-like (LOC100854228), mRNA	sp|Q1PF50|EDA2_ARATH	101	2e-22	Probable serine protease EDA2 OS=Arabidopsis thaliana GN=EDA2 PE=2 SV=2
CL10435.Contig2_All	375	43	6.3916	51	7.8325	gi|224097128|ref|XP_002310843.1|	150.6	7e-36	predicted protein [Populus trichocarpa] >gi|222853746|gb|EEE91293.1| predicted protein [Populus trichocarpa]	gi|359476843|ref|XM_003631850.1|	83.8	1e-13	PREDICTED: Vitis vinifera probable serine protease EDA2-like (LOC100854228), mRNA	sp|Q1PF50|EDA2_ARATH	97.4	2e-21	Probable serine protease EDA2 OS=Arabidopsis thaliana GN=EDA2 PE=2 SV=2
CL10436.Contig1_All	209	8	2.1336	9	2.48	gi|255580717|ref|XP_002531180.1|	75.9	2e-13	hypothetical protein RCOM_0012650 [Ricinus communis] >gi|223529221|gb|EEF31195.1| hypothetical protein RCOM_0012650 [Ricinus communis]	--	--	--	--	--	--	--	--
CL10436.Contig2_All	403	27	3.7345	31	4.4301	gi|255580717|ref|XP_002531180.1|	81.3	5e-15	hypothetical protein RCOM_0012650 [Ricinus communis] >gi|223529221|gb|EEF31195.1| hypothetical protein RCOM_0012650 [Ricinus communis]	--	--	--	--	--	--	--	--
CL10437.Contig1_All	1551	366	13.1535	415	15.4097	gi|118482189|gb|ABK93023.1|	471.9	1e-131	unknown [Populus trichocarpa]	gi|156713524|gb|AC209268.1|	1733	0	Populus trichocarpa clone ACSB209-O03, complete sequence	--	--	--	--
CL10438.Contig1_All	510	95	10.3831	54	6.0979	gi|224075776|ref|XP_002304762.1|	238	5e-62	predicted protein [Populus trichocarpa] >gi|222842194|gb|EEE79741.1| predicted protein [Populus trichocarpa]	gi|164498898|gb|AC216409.1|	640	0	Populus trichocarpa clone POP024-J08, complete sequence	--	--	--	--
CL10438.Contig2_All	1157	1541	74.2405	1218	60.628	gi|224075776|ref|XP_002304762.1|	622.1	5e-177	predicted protein [Populus trichocarpa] >gi|222842194|gb|EEE79741.1| predicted protein [Populus trichocarpa]	gi|164498898|gb|AC216409.1|	1065	0	Populus trichocarpa clone POP024-J08, complete sequence	--	--	--	--
CL10439.Contig1_All	2541	1042	22.8578	848	19.2199	gi|224055166|ref|XP_002298427.1|	1523.1	0	predicted protein [Populus trichocarpa] >gi|222845685|gb|EEE83232.1| predicted protein [Populus trichocarpa]	gi|147787724|emb|AM443227.2|	107	6e-20	Vitis vinifera contig VV79X000254.2, whole genome shotgun sequence	--	--	--	--
CL10439.Contig2_All	394	17	2.4051	22	3.2158	gi|224106091|ref|XP_002314039.1|	60.8	7e-09	predicted protein [Populus trichocarpa] >gi|222850447|gb|EEE87994.1| predicted protein [Populus trichocarpa]	gi|224106090|ref|XM_002314003.1|	178	3e-42	Populus trichocarpa predicted protein, mRNA	--	--	--	--
CL1044.Contig1_All	643	79	6.8484	49	4.3888	gi|224140641|ref|XP_002323690.1|	56.2	4e-07	auxin efflux carrier component, auxin transport protein [Populus trichocarpa] >gi|222868320|gb|EEF05451.1| auxin efflux carrier component, auxin transport protein [Populus trichocarpa]	gi|224140640|ref|XM_002323654.1|	161	1e-36	Populus trichocarpa auxin efflux carrier component, auxin transport protein, mRNA	--	--	--	--
CL1044.Contig2_All	628	70	6.2131	100	9.1706	gi|224140641|ref|XP_002323690.1|	56.2	4e-07	auxin efflux carrier component, auxin transport protein [Populus trichocarpa] >gi|222868320|gb|EEF05451.1| auxin efflux carrier component, auxin transport protein [Populus trichocarpa]	gi|224140640|ref|XM_002323654.1|	161	1e-36	Populus trichocarpa auxin efflux carrier component, auxin transport protein, mRNA	--	--	--	--
CL10440.Contig1_All	764	8	0.5837	7	0.5277	gi|224090911|ref|XP_002309113.1|	347.8	1e-94	predicted protein [Populus trichocarpa] >gi|222855089|gb|EEE92636.1| predicted protein [Populus trichocarpa]	gi|359481696|ref|XM_002277196.2|	246	3e-62	PREDICTED: Vitis vinifera uncharacterized LOC100249497 (LOC100249497), mRNA	--	--	--	--
CL10440.Contig2_All	1330	253	10.6033	240	10.3925	gi|224090911|ref|XP_002309113.1|	677.6	0	predicted protein [Populus trichocarpa] >gi|222855089|gb|EEE92636.1| predicted protein [Populus trichocarpa]	gi|356520976|ref|XM_003529087.1|	373	1e-100	PREDICTED: Glycine max uncharacterized protein LOC100816518 (LOC100816518), mRNA	--	--	--	--
CL10441.Contig1_All	521	93	9.9499	97	10.7224	gi|224143941|ref|XP_002325130.1|	136.3	2e-31	predicted protein [Populus trichocarpa] >gi|222866564|gb|EEF03695.1| predicted protein [Populus trichocarpa]	gi|160954965|emb|CU230519.1|	394	1e-107	Populus EST from mild drought-stressed leaves	sp|Q8W4A5|APO2_ARATH	85.1	2e-17	APO protein 2, chloroplastic OS=Arabidopsis thaliana GN=APO2 PE=2 SV=1
CL10441.Contig2_All	451	38	4.6965	48	6.1295	gi|147794339|emb|CAN76001.1|	43.1	5e-23	hypothetical protein VITISV_019165 [Vitis vinifera]	gi|160954965|emb|CU230519.1|	394	1e-107	Populus EST from mild drought-stressed leaves	sp|Q8W4A5|APO2_ARATH	85.1	2e-17	APO protein 2, chloroplastic OS=Arabidopsis thaliana GN=APO2 PE=2 SV=1
CL10442.Contig1_All	294	13	2.4647	14	2.7425	gi|302839467|ref|XP_002951290.1|	71.2	5e-12	hypothetical protein VOLCADRAFT_91811 [Volvox carteri f. nagariensis] >gi|300263265|gb|EFJ47466.1| hypothetical protein VOLCADRAFT_91811 [Volvox carteri f. nagariensis]	--	--	--	--	--	--	--	--
CL10442.Contig2_All	593	34	3.1959	28	2.7193	gi|302835337|ref|XP_002949230.1|	95.5	5e-19	hypothetical protein VOLCADRAFT_89474 [Volvox carteri f. nagariensis] >gi|300265532|gb|EFJ49723.1| hypothetical protein VOLCADRAFT_89474 [Volvox carteri f. nagariensis]	--	--	--	--	sp|P14918|EXTN_MAIZE	53.5	8e-08	Extensin OS=Zea mays GN=HRGP PE=2 SV=1
CL10443.Contig1_All	1457	35	1.339	38	1.502	gi|224136862|ref|XP_002322434.1|	562.8	5e-159	predicted protein [Populus trichocarpa] >gi|222869430|gb|EEF06561.1| predicted protein [Populus trichocarpa]	gi|160957058|emb|CU226231.1|	1403	0	Populus EST from leave	sp|Q9FJ82|DAPB3_ARATH	447	7e-126	Putative 4-hydroxy-tetrahydrodipicolinate reductase 3, chloroplastic OS=Arabidopsis thaliana GN=DAPB3 PE=2 SV=1
CL10443.Contig2_All	1278	85	3.7073	83	3.7403	gi|224136862|ref|XP_002322434.1|	582.4	5e-165	predicted protein [Populus trichocarpa] >gi|222869430|gb|EEF06561.1| predicted protein [Populus trichocarpa]	gi|160957058|emb|CU226231.1|	1403	0	Populus EST from leave	sp|Q9FJ82|DAPB3_ARATH	467	7e-132	Putative 4-hydroxy-tetrahydrodipicolinate reductase 3, chloroplastic OS=Arabidopsis thaliana GN=DAPB3 PE=2 SV=1
CL10444.Contig1_All	981	128	7.273	122	7.1623	gi|224118582|ref|XP_002317856.1|	565.8	3e-160	predicted protein [Populus trichocarpa] >gi|222858529|gb|EEE96076.1| predicted protein [Populus trichocarpa]	gi|161789305|gb|AC215623.1|	303	2e-79	Populus trichocarpa clone POP004-A06, complete sequence	--	--	--	--
CL10444.Contig2_All	980	178	10.1243	127	7.4634	gi|224134909|ref|XP_002321935.1|	595.9	3e-169	predicted protein [Populus trichocarpa] >gi|222868931|gb|EEF06062.1| predicted protein [Populus trichocarpa]	gi|161789305|gb|AC215623.1|	464	1e-128	Populus trichocarpa clone POP004-A06, complete sequence	--	--	--	--
CL10445.Contig1_All	312	22	3.9304	15	2.7688	gi|224089442|ref|XP_002308721.1|	206.5	1e-52	predicted protein [Populus trichocarpa] >gi|222854697|gb|EEE92244.1| predicted protein [Populus trichocarpa]	gi|157365042|gb|AC210391.1|	167	8e-39	Populus trichocarpa clone POP117-H13, complete sequence	sp|Q9FVR6|Y1222_ARATH	78.6	8e-16	Uncharacterized protein At1g32220, chloroplastic OS=Arabidopsis thaliana GN=At1g32220 PE=1 SV=1
CL10445.Contig2_All	1146	202	9.8251	202	10.1514	gi|224142023|ref|XP_002324359.1|	558.9	5e-158	predicted protein [Populus trichocarpa] >gi|222865793|gb|EEF02924.1| predicted protein [Populus trichocarpa]	gi|225430577|ref|XM_002263783.1|	458	1e-126	PREDICTED: Vitis vinifera uncharacterized LOC100263954 (LOC100263954), mRNA	sp|Q9FVR6|Y1222_ARATH	201	9e-52	Uncharacterized protein At1g32220, chloroplastic OS=Arabidopsis thaliana GN=At1g32220 PE=1 SV=1
CL10446.Contig1_All	1160	31	1.4896	27	1.3405	gi|224069380|ref|XP_002326344.1|	321.6	1e-86	predicted protein [Populus trichocarpa] >gi|222833537|gb|EEE72014.1| predicted protein [Populus trichocarpa]	gi|359481352|ref|XM_003632561.1|	77.8	2e-11	PREDICTED: Vitis vinifera uncharacterized LOC100854914 (LOC100854914), mRNA	--	--	--	--
CL10446.Contig2_All	1269	90	3.9532	88	3.9937	gi|224069380|ref|XP_002326344.1|	321.6	1e-86	predicted protein [Populus trichocarpa] >gi|222833537|gb|EEE72014.1| predicted protein [Populus trichocarpa]	gi|359481352|ref|XM_003632561.1|	77.8	3e-11	PREDICTED: Vitis vinifera uncharacterized LOC100854914 (LOC100854914), mRNA	--	--	--	--
CL10447.Contig1_All	1893	3931	115.751	3540	107.699	gi|224124910|ref|XP_002319454.1|	936.8	0	predicted protein [Populus trichocarpa] >gi|222857830|gb|EEE95377.1| predicted protein [Populus trichocarpa]	gi|160958672|emb|CU227034.1|	975	0	Populus EST from severe drought-stressed leaves	sp|P42211|ASPRX_ORYSJ	672	0	Aspartic proteinase OS=Oryza sativa subsp. japonica GN=RAP PE=2 SV=2
CL10448.Contig1_All	880	41	2.597	50	3.2723	gi|224065403|ref|XP_002301800.1|	385.2	7e-106	predicted protein [Populus trichocarpa] >gi|222843526|gb|EEE81073.1| predicted protein [Populus trichocarpa]	gi|470107707|ref|XM_004290136.1|	252	5e-64	PREDICTED: Fragaria vesca subsp. vesca uncharacterized LOC101311814, transcript variant 2 (LOC101311814), mRNA	sp|Q9T0K5|LRX3_ARATH	36.2	7e-06	Leucine-rich repeat extensin-like protein 3 OS=Arabidopsis thaliana GN=LRX3 PE=1 SV=1
CL10448.Contig2_All	1384	296	11.9214	266	11.0689	gi|224065403|ref|XP_002301800.1|	621.3	1e-176	predicted protein [Populus trichocarpa] >gi|222843526|gb|EEE81073.1| predicted protein [Populus trichocarpa]	gi|160949404|emb|CU222837.1|	468	1e-129	Populus EST from leave	sp|Q9T0K5|LRX3_ARATH	36.2	7e-06	Leucine-rich repeat extensin-like protein 3 OS=Arabidopsis thaliana GN=LRX3 PE=1 SV=1
CL10449.Contig1_All	644	179	15.4931	120	10.7314	gi|224128278|ref|XP_002320287.1|	339	3e-92	predicted protein [Populus trichocarpa] >gi|222861060|gb|EEE98602.1| predicted protein [Populus trichocarpa]	gi|359479952|ref|XM_002270892.2|	85.7	5e-14	PREDICTED: Vitis vinifera receptor-like serine/threonine-protein kinase ALE2 (LOC100264089), mRNA	--	--	--	--
CL10449.Contig2_All	790	129	9.1019	85	6.1966	gi|224128278|ref|XP_002320287.1|	296.6	3e-79	predicted protein [Populus trichocarpa] >gi|222861060|gb|EEE98602.1| predicted protein [Populus trichocarpa]	gi|297207329|gb|AC241150.1|	61.9	9e-07	Brassica rapa subsp. pekinensis clone KBrH085M22, complete sequence	--	--	--	--
CL1045.Contig1_All	1537	2576	93.4208	2820	105.666	gi|224136005|ref|XP_002322215.1|	837.4	0	predicted protein [Populus trichocarpa] >gi|222869211|gb|EEF06342.1| predicted protein [Populus trichocarpa]	gi|359491174|ref|XM_002275745.2|	716	0	PREDICTED: Vitis vinifera probable pectate lyase 5-like (LOC100243265), mRNA	sp|Q9C5M8|PLY18_ARATH	720	0	Probable pectate lyase 18 OS=Arabidopsis thaliana GN=At4g24780 PE=2 SV=2
CL1045.Contig2_All	360	33	5.1096	38	6.0791	gi|224121874|ref|XP_002318694.1|	248.1	3e-65	predicted protein [Populus trichocarpa] >gi|222859367|gb|EEE96914.1| predicted protein [Populus trichocarpa]	gi|345104326|gb|JF722332.1|	226	1e-56	Gossypium lobatum pectate lyase gene, complete cds	sp|Q9FXD8|PLY5_ARATH	225	5e-60	Probable pectate lyase 5 OS=Arabidopsis thaliana GN=At1g67750 PE=2 SV=2
CL1045.Contig3_All	1629	308	10.539	322	11.384	gi|224100109|ref|XP_002311747.1|	793.9	0	predicted protein [Populus trichocarpa] >gi|222851567|gb|EEE89114.1| predicted protein [Populus trichocarpa]	gi|14289168|dbj|AB048260.1|	1096	0	Salix gilgiana SgPL1 mRNA for pectate lyase, complete cds	sp|Q9FXD8|PLY5_ARATH	714	0	Probable pectate lyase 5 OS=Arabidopsis thaliana GN=At1g67750 PE=2 SV=2
CL1045.Contig4_All	387	166	23.9094	139	20.6854	gi|224100109|ref|XP_002311747.1|	265.8	1e-70	predicted protein [Populus trichocarpa] >gi|222851567|gb|EEE89114.1| predicted protein [Populus trichocarpa]	gi|158854076|gb|AC213496.1|	482	1e-133	Populus trichocarpa clone POP080-H20, complete sequence	sp|Q9FXD8|PLY5_ARATH	213	3e-56	Probable pectate lyase 5 OS=Arabidopsis thaliana GN=At1g67750 PE=2 SV=2
CL1045.Contig5_All	491	36	4.0869	47	5.5128	gi|224060175|ref|XP_002300069.1|	346.7	8e-95	predicted protein [Populus trichocarpa] >gi|222847327|gb|EEE84874.1| predicted protein [Populus trichocarpa]	gi|225452243|ref|XM_002268940.1|	268	5e-69	PREDICTED: Vitis vinifera pectate lyase (PEL), mRNA	sp|O24554|PLY_ZINEL	305	9e-84	Pectate lyase OS=Zinnia elegans PE=1 SV=1
CL10450.Contig1_All	260	11	2.3583	9	1.9936	--	--	--	--	gi|224100430|ref|XM_002311837.1|	79.8	1e-12	Populus trichocarpa predicted protein, mRNA	--	--	--	--
CL10450.Contig2_All	341	5	0.8173	8	1.3511	--	--	--	--	gi|224100430|ref|XM_002311837.1|	79.8	2e-12	Populus trichocarpa predicted protein, mRNA	--	--	--	--
CL10451.Contig1_All	513	290	31.5103	275	30.8727	gi|357446695|ref|XP_003593623.1|	51.2	8e-06	Zinc finger CCCH domain-containing protein [Medicago truncatula] >gi|355482671|gb|AES63874.1| Zinc finger CCCH domain-containing protein [Medicago truncatula]	--	--	--	--	sp|P14594|LEGB_PEA	48.9	2e-06	Legumin B (Fragment) OS=Pisum sativum GN=LEGB PE=2 SV=1
CL10451.Contig2_All	457	222	27.0775	166	20.9195	gi|300175007|emb|CBK20318.2|	50.8	8e-06	unnamed protein product [Blastocystis hominis]	--	--	--	--	sp|Q6Z1C0|NUCL1_ORYSJ	51.6	2e-07	Nucleolin 1 OS=Oryza sativa subsp. japonica GN=Os08g0192900 PE=2 SV=1
CL10452.Contig1_All	639	62	5.4083	62	5.5879	gi|224132728|ref|XP_002327866.1|	302	4e-81	predicted protein [Populus trichocarpa] >gi|222837275|gb|EEE75654.1| predicted protein [Populus trichocarpa]	gi|160688510|gb|AC214628.1|	1094	0	Populus trichocarpa clone POP040-F15, complete sequence	sp|Q9SRR7|CML3_ARATH	263	8e-71	Calmodulin-like protein 3 OS=Arabidopsis thaliana GN=CML3 PE=2 SV=1
CL10452.Contig2_All	725	43	3.306	73	5.7989	gi|224132728|ref|XP_002327866.1|	298.5	6e-80	predicted protein [Populus trichocarpa] >gi|222837275|gb|EEE75654.1| predicted protein [Populus trichocarpa]	gi|160688510|gb|AC214628.1|	854	0	Populus trichocarpa clone POP040-F15, complete sequence	sp|Q9SRR7|CML3_ARATH	259	1e-69	Calmodulin-like protein 3 OS=Arabidopsis thaliana GN=CML3 PE=2 SV=1
CL10453.Contig1_All	233	36	8.6123	37	9.1454	gi|224146708|ref|XP_002326107.1|	63.2	1e-09	predicted protein [Populus trichocarpa] >gi|118488098|gb|ABK95869.1| unknown [Populus trichocarpa] >gi|222862982|gb|EEF00489.1| predicted protein [Populus trichocarpa]	gi|118488097|gb|EF147870.1|	400	1e-109	Populus trichocarpa clone WS0125_J09 unknown mRNA	--	--	--	--
CL10453.Contig2_All	719	154	11.9389	163	13.0562	gi|224124664|ref|XP_002319388.1|	210.3	2e-53	predicted protein [Populus trichocarpa] >gi|222857764|gb|EEE95311.1| predicted protein [Populus trichocarpa]	gi|349709912|emb|FQ378723.1|	75.8	6e-11	Vitis vinifera clone SS0AEB12YK18	sp|Q9SUC9|UGPI7_ARATH	129	1e-30	Uncharacterized GPI-anchored protein At4g28100 OS=Arabidopsis thaliana GN=At4g28100 PE=1 SV=1
CL10454.Contig1_All	261	74	15.8038	98	21.6244	gi|224079089|ref|XP_002305745.1|	134.4	5e-31	predicted protein [Populus trichocarpa] >gi|118483353|gb|ABK93578.1| unknown [Populus trichocarpa] >gi|222848709|gb|EEE86256.1| predicted protein [Populus trichocarpa]	gi|359483733|ref|XM_002273086.2|	125	2e-26	PREDICTED: Vitis vinifera uncharacterized LOC100254926 (LOC100254926), mRNA	--	--	--	--
CL10454.Contig2_All	258	17	3.6728	33	7.3664	gi|224116896|ref|XP_002317421.1|	139.8	1e-32	predicted protein [Populus trichocarpa] >gi|118485045|gb|ABK94387.1| unknown [Populus trichocarpa] >gi|222860486|gb|EEE98033.1| predicted protein [Populus trichocarpa]	gi|359483733|ref|XM_002273086.2|	125	2e-26	PREDICTED: Vitis vinifera uncharacterized LOC100254926 (LOC100254926), mRNA	--	--	--	--
CL10455.Contig1_All	708	190	14.9586	127	10.3307	--	--	--	--	gi|224083373|ref|XM_002306966.1|	400	1e-109	Populus trichocarpa predicted protein, mRNA	--	--	--	--
CL10455.Contig2_All	422	29	3.8305	31	4.2307	--	--	--	--	gi|224083373|ref|XM_002306966.1|	367	6e-99	Populus trichocarpa predicted protein, mRNA	--	--	--	--
CL10456.Contig1_All	244	7	1.5991	9	2.1243	--	--	--	--	--	--	--	--	--	--	--	--
CL10457.Contig1_All	377	49	7.2448	52	7.9437	gi|224071385|ref|XP_002303434.1|	249.6	1e-65	jumonji domain protein [Populus trichocarpa] >gi|222840866|gb|EEE78413.1| jumonji domain protein [Populus trichocarpa]	gi|224071384|ref|XM_002303398.1|	666	0	Populus trichocarpa jumonji domain protein (JMJ906), mRNA	--	--	--	--
CL10458.Contig1_All	207	178	47.9315	209	58.148	gi|24817256|emb|CAD56220.1|	114	7e-25	ribosomal protein RL5 [Cicer arietinum]	gi|292756560|dbj|AK337418.1|	153	8e-35	Lotus japonicus cDNA, clone: LjFL1-061-AE11, HTC	sp|P46287|RL11_MEDSA	114	2e-26	60S ribosomal protein L11 OS=Medicago sativa GN=RPL11 PE=2 SV=1
CL10458.Contig2_All	987	612	34.5626	503	29.3501	gi|224091825|ref|XP_002309361.1|	360.9	1e-98	predicted protein [Populus trichocarpa] >gi|224091827|ref|XP_002309362.1| predicted protein [Populus trichocarpa] >gi|224116812|ref|XP_002317400.1| predicted protein [Populus trichocarpa] >gi|224116816|ref|XP_002317401.1| predicted protein [Populus trichocarpa] >gi|118483608|gb|ABK93699.1| unknown [Populus trichocarpa] >gi|222855337|gb|EEE92884.1| predicted protein [Populus trichocarpa] >gi|22285…	gi|470115563|ref|XM_004293920.1|	448	1e-123	PREDICTED: Fragaria vesca subsp. vesca 60S ribosomal protein L11-like (LOC101302044), mRNA	sp|P46287|RL11_MEDSA	350	9e-97	60S ribosomal protein L11 OS=Medicago sativa GN=RPL11 PE=2 SV=1
CL10458.Contig3_All	830	146	9.805	111	7.702	gi|224091825|ref|XP_002309361.1|	360.9	1e-98	predicted protein [Populus trichocarpa] >gi|224091827|ref|XP_002309362.1| predicted protein [Populus trichocarpa] >gi|224116812|ref|XP_002317400.1| predicted protein [Populus trichocarpa] >gi|224116816|ref|XP_002317401.1| predicted protein [Populus trichocarpa] >gi|118483608|gb|ABK93699.1| unknown [Populus trichocarpa] >gi|222855337|gb|EEE92884.1| predicted protein [Populus trichocarpa] >gi|22285…	gi|470115563|ref|XM_004293920.1|	448	1e-123	PREDICTED: Fragaria vesca subsp. vesca 60S ribosomal protein L11-like (LOC101302044), mRNA	sp|P46287|RL11_MEDSA	350	7e-97	60S ribosomal protein L11 OS=Medicago sativa GN=RPL11 PE=2 SV=1
CL10459.Contig1_All	669	58	4.8325	55	4.7347	gi|224139106|ref|XP_002326769.1|	275	6e-73	predicted protein [Populus trichocarpa] >gi|222834091|gb|EEE72568.1| predicted protein [Populus trichocarpa]	gi|359474704|ref|XM_002263826.2|	186	2e-44	PREDICTED: Vitis vinifera uncharacterized LOC100256168 (LOC100256168), mRNA	--	--	--	--
CL10459.Contig2_All	557	4	0.4003	6	0.6204	gi|224139106|ref|XP_002326769.1|	168.3	6e-41	predicted protein [Populus trichocarpa] >gi|222834091|gb|EEE72568.1| predicted protein [Populus trichocarpa]	gi|359474704|ref|XM_002263826.2|	159	4e-36	PREDICTED: Vitis vinifera uncharacterized LOC100256168 (LOC100256168), mRNA	--	--	--	--
CL1046.Contig1_All	958	182	10.5895	175	10.5204	gi|224104577|ref|XP_002313486.1|	479.2	4e-134	predicted protein [Populus trichocarpa] >gi|222849894|gb|EEE87441.1| predicted protein [Populus trichocarpa]	gi|224104576|ref|XM_002313450.1|	1271	0	Populus trichocarpa predicted protein, mRNA	sp|Q8VZ13|Y1816_ARATH	82.8	3e-16	Uncharacterized protein At1g08160 OS=Arabidopsis thaliana GN=At1g08160 PE=2 SV=1
CL1046.Contig2_All	914	302	18.4176	389	24.5111	gi|224054468|ref|XP_002298275.1|	478.4	7e-134	predicted protein [Populus trichocarpa] >gi|222845533|gb|EEE83080.1| predicted protein [Populus trichocarpa]	gi|224054467|ref|XM_002298239.1|	1314	0	Populus trichocarpa predicted protein, mRNA	sp|Q8VZ13|Y1816_ARATH	75.9	3e-14	Uncharacterized protein At1g08160 OS=Arabidopsis thaliana GN=At1g08160 PE=2 SV=1
CL10460.Contig1_All	358	32	4.9824	31	4.987	gi|224099885|ref|XP_002311659.1|	131	5e-30	predicted protein [Populus trichocarpa] >gi|222851479|gb|EEE89026.1| predicted protein [Populus trichocarpa]	gi|224099884|ref|XM_002311623.1|	353	8e-95	Populus trichocarpa predicted protein, mRNA	--	--	--	--
CL10461.Contig1_All	786	268	19.0057	271	19.8566	gi|224128960|ref|XP_002320465.1|	238	1e-61	predicted protein [Populus trichocarpa] >gi|222861238|gb|EEE98780.1| predicted protein [Populus trichocarpa]	gi|160956914|emb|CU231424.1|	607	1e-171	Populus EST from mild drought-stressed leaves	sp|Q9SL04|ATG8D_ARATH	224	4e-59	Autophagy-related protein 8d OS=Arabidopsis thaliana GN=ATG8D PE=1 SV=1
CL10461.Contig2_All	726	669	51.3643	583	46.2478	gi|224068998|ref|XP_002302875.1|	241.5	9e-63	predicted protein [Populus trichocarpa] >gi|118485794|gb|ABK94745.1| unknown [Populus trichocarpa] >gi|222844601|gb|EEE82148.1| predicted protein [Populus trichocarpa]	gi|160956914|emb|CU231424.1|	367	1e-98	Populus EST from mild drought-stressed leaves	sp|Q6Z1D5|ATG8C_ORYSJ	220	7e-58	Autophagy-related protein 8C OS=Oryza sativa subsp. japonica GN=ATG8C PE=2 SV=1
CL10461.Contig3_All	764	64	4.6694	70	5.2767	gi|224128960|ref|XP_002320465.1|	238	1e-61	predicted protein [Populus trichocarpa] >gi|222861238|gb|EEE98780.1| predicted protein [Populus trichocarpa]	gi|160956914|emb|CU231424.1|	454	1e-125	Populus EST from mild drought-stressed leaves	sp|Q9SL04|ATG8D_ARATH	224	4e-59	Autophagy-related protein 8d OS=Arabidopsis thaliana GN=ATG8D PE=1 SV=1
CL10462.Contig1_All	1074	81	4.2039	84	4.5044	gi|224099839|ref|XP_002311640.1|	397.1	2e-109	predicted protein [Populus trichocarpa] >gi|222851460|gb|EEE89007.1| predicted protein [Populus trichocarpa]	gi|160960879|emb|CU228267.1|	942	0	Populus EST from severe drought-stressed leaves	sp|D7T737|MTND1_VITVI	325	4e-89	1,2-dihydroxy-3-keto-5-methylthiopentene dioxygenase 1 OS=Vitis vinifera GN=VIT_05s0020g04070 PE=3 SV=1
CL10462.Contig2_All	964	80	4.6258	43	2.5689	gi|224099839|ref|XP_002311640.1|	397.1	2e-109	predicted protein [Populus trichocarpa] >gi|222851460|gb|EEE89007.1| predicted protein [Populus trichocarpa]	gi|160960879|emb|CU228267.1|	781	0	Populus EST from severe drought-stressed leaves	sp|D7T737|MTND1_VITVI	325	3e-89	1,2-dihydroxy-3-keto-5-methylthiopentene dioxygenase 1 OS=Vitis vinifera GN=VIT_05s0020g04070 PE=3 SV=1
CL10463.Contig1_All	894	2195	136.857	1703	109.707	gi|333108561|gb|AEF15864.1|	332	7e-90	eukaryotic translation initiation factor 5A4 [Populus tomentosa] >gi|333108571|gb|AEF15869.1| eukaryotic translation initiation factor 5A4 [Populus tremula x Populus alba]	gi|223047855|gb|FJ032305.1|	1334	0	Populus deltoides eIF5A4 mRNA, complete cds	sp|Q9AXJ4|IF5A_MANES	314	5e-86	Eukaryotic translation initiation factor 5A OS=Manihot esculenta PE=2 SV=2
CL10463.Contig2_All	927	3750	225.488	3513	218.252	gi|223047852|gb|ACM79936.1|	329.7	4e-89	eIF5A2 [Populus deltoides] >gi|333108557|gb|AEF15862.1| eukaryotic translation initiation factor 5A2 [Populus tomentosa] >gi|333108567|gb|AEF15867.1| eukaryotic translation initiation factor 5A2 [Populus tremula x Populus alba]	gi|160956533|emb|CU226201.1|	1536	0	Populus EST from leave	sp|Q9AXJ4|IF5A_MANES	313	7e-86	Eukaryotic translation initiation factor 5A OS=Manihot esculenta PE=2 SV=2
CL10464.Contig1_All	1055	75	3.9626	72	3.9304	gi|224097660|ref|XP_002311031.1|	369.8	4e-101	predicted protein [Populus trichocarpa] >gi|222850851|gb|EEE88398.1| predicted protein [Populus trichocarpa]	gi|162809363|gb|AC215899.1|	860	0	Populus trichocarpa clone POP051-J14, complete sequence	--	--	--	--
CL10464.Contig2_All	758	8	0.5883	15	1.1397	gi|224097660|ref|XP_002311031.1|	370.5	1e-101	predicted protein [Populus trichocarpa] >gi|222850851|gb|EEE88398.1| predicted protein [Populus trichocarpa]	gi|162809363|gb|AC215899.1|	860	0	Populus trichocarpa clone POP051-J14, complete sequence	--	--	--	--
CL10465.Contig1_All	289	34	6.5577	29	5.7791	--	--	--	--	gi|160421808|gb|AC214597.1|	153	1e-34	Populus trichocarpa clone POP037-E17, complete sequence	--	--	--	--
CL10465.Contig2_All	301	72	13.3333	72	13.7761	--	--	--	--	gi|160421808|gb|AC214597.1|	466	1e-129	Populus trichocarpa clone POP037-E17, complete sequence	--	--	--	--
CL10466.Contig1_All	560	60	5.9722	49	5.0393	gi|224121058|ref|XP_002330893.1|	248.1	6e-65	predicted protein [Populus trichocarpa] >gi|222872715|gb|EEF09846.1| predicted protein [Populus trichocarpa]	gi|359487466|ref|XM_002268184.2|	97.6	1e-17	PREDICTED: Vitis vinifera uncharacterized LOC100251070 (LOC100251070), mRNA	--	--	--	--
CL10466.Contig2_All	575	108	10.4695	91	9.1145	gi|224121058|ref|XP_002330893.1|	248.1	6e-65	predicted protein [Populus trichocarpa] >gi|222872715|gb|EEF09846.1| predicted protein [Populus trichocarpa]	gi|359487466|ref|XM_002268184.2|	97.6	1e-17	PREDICTED: Vitis vinifera uncharacterized LOC100251070 (LOC100251070), mRNA	--	--	--	--
CL10467.Contig1_All	341	0	0	4	0.6756	gi|224113803|ref|XP_002332498.1|	161	5e-39	predicted protein [Populus trichocarpa] >gi|222832608|gb|EEE71085.1| predicted protein [Populus trichocarpa]	gi|460201960|gb|GABL01059723.1|	121	5e-25	TSA: Camelina sativa comp57770_c0_seq1 transcribed RNA sequence	--	--	--	--
CL10467.Contig2_All	768	239	17.3464	200	14.9978	gi|224113803|ref|XP_002332498.1|	460.7	1e-128	predicted protein [Populus trichocarpa] >gi|222832608|gb|EEE71085.1| predicted protein [Populus trichocarpa]	gi|349715264|emb|FQ380566.1|	244	1e-61	Vitis vinifera clone SS0ACG49YP22	--	--	--	--
CL10468.Contig1_All	3891	2835	40.6128	2383	35.2713	gi|224127744|ref|XP_002320153.1|	2077.4	0	predicted protein [Populus trichocarpa] >gi|222860926|gb|EEE98468.1| predicted protein [Populus trichocarpa]	gi|356566916|ref|XM_003551623.1|	139	3e-29	PREDICTED: Glycine max uncharacterized protein LOC100791243 (LOC100791243), mRNA	--	--	--	--
CL10468.Contig2_All	3475	1800	28.8728	1305	21.6279	gi|224064059|ref|XP_002301371.1|	2096.6	0	predicted protein [Populus trichocarpa] >gi|222843097|gb|EEE80644.1| predicted protein [Populus trichocarpa]	gi|356530047|ref|XM_003533548.1|	155	4e-34	PREDICTED: Glycine max uncharacterized protein LOC100776293 (LOC100776293), mRNA	--	--	--	--
CL10469.Contig1_All	843	622	41.1277	627	42.835	gi|224128400|ref|XP_002320320.1|	245	1e-63	predicted protein [Populus trichocarpa] >gi|222861093|gb|EEE98635.1| predicted protein [Populus trichocarpa]	gi|224128399|ref|XM_002320284.1|	745	0	Populus trichocarpa predicted protein, mRNA	sp|Q9FJ10|GAT16_ARATH	120	1e-27	GATA transcription factor 16 OS=Arabidopsis thaliana GN=GATA16 PE=2 SV=1
CL10469.Contig2_All	781	229	16.3439	245	18.0665	gi|118488832|gb|ABK96226.1|	262.7	4e-69	unknown [Populus trichocarpa x Populus deltoides]	gi|118488831|gb|EF148247.1|	971	0	Populus trichocarpa x Populus deltoides clone WS01312_C13 unknown mRNA	sp|Q9FJ10|GAT16_ARATH	116	1e-26	GATA transcription factor 16 OS=Arabidopsis thaliana GN=GATA16 PE=2 SV=1
CL1047.Contig1_All	847	45	2.9614	57	3.8757	gi|224091120|ref|XP_002309185.1|	364.4	1e-99	predicted protein [Populus trichocarpa] >gi|222855161|gb|EEE92708.1| predicted protein [Populus trichocarpa]	gi|470133426|ref|XM_004302519.1|	224	1e-55	PREDICTED: Fragaria vesca subsp. vesca transmembrane protein 87B-like (LOC101314580), mRNA	--	--	--	--
CL1047.Contig2_All	1851	422	12.708	390	12.1344	gi|224140609|ref|XP_002323674.1|	885.2	0	predicted protein [Populus trichocarpa] >gi|222868304|gb|EEF05435.1| predicted protein [Populus trichocarpa]	gi|470133426|ref|XM_004302519.1|	444	1e-121	PREDICTED: Fragaria vesca subsp. vesca transmembrane protein 87B-like (LOC101314580), mRNA	--	--	--	--
CL10470.Contig1_All	362	36	5.5433	42	6.6819	--	--	--	--	--	--	--	--	--	--	--	--
CL10471.Contig1_All	1144	211	10.2808	189	9.5147	gi|224112919|ref|XP_002316330.1|	559.3	4e-158	predicted protein [Populus trichocarpa] >gi|222865370|gb|EEF02501.1| predicted protein [Populus trichocarpa]	gi|470143558|ref|XM_004307393.1|	394	1e-107	PREDICTED: Fragaria vesca subsp. vesca nitrilase homolog 1-like (LOC101314412), mRNA	sp|Q9XGI9|AGUB_SOLLC	89.7	3e-18	N-carbamoylputrescine amidase OS=Solanum lycopersicum GN=CPA PE=2 SV=1
CL10472.Contig1_All	553	23	2.3183	19	1.9787	gi|224135907|ref|XP_002327333.1|	102.1	5e-21	predicted protein [Populus trichocarpa] >gi|222835703|gb|EEE74138.1| predicted protein [Populus trichocarpa]	gi|224135906|ref|XM_002327297.1|	295	2e-77	Populus trichocarpa predicted protein, mRNA	--	--	--	--
CL10472.Contig2_All	564	4	0.3953	9	0.919	gi|224145191|ref|XP_002325559.1|	112.1	5e-24	predicted protein [Populus trichocarpa] >gi|222862434|gb|EEE99940.1| predicted protein [Populus trichocarpa]	gi|224145190|ref|XM_002325523.1|	319	2e-84	Populus trichocarpa predicted protein, mRNA	--	--	--	--
CL10473.Contig1_All	204	0	0	2	0.5646	gi|428166345|gb|EKX35322.1|	53.9	9e-07	hypothetical protein GUITHDRAFT_118448 [Guillardia theta CCMP2712]	gi|392512964|emb|FO082267.1|	61.9	2e-07	Bathycoccus prasinos genomic : Chromosome_12	sp|B2ZX90|FAS1_ORYSJ	47	3e-06	Chromatin assembly factor 1 subunit FSM OS=Oryza sativa subsp. japonica GN=FSM PE=2 SV=1
CL10473.Contig2_All	223	6	1.4997	19	4.9069	gi|428168677|gb|EKX37619.1|	50.4	9e-06	hypothetical protein GUITHDRAFT_144891 [Guillardia theta CCMP2712]	gi|332656411|gb|CP002687.1|	60	1e-06	Arabidopsis thaliana chromosome 4, complete sequence	sp|B2ZX90|FAS1_ORYSJ	52	8e-08	Chromatin assembly factor 1 subunit FSM OS=Oryza sativa subsp. japonica GN=FSM PE=2 SV=1
CL10474.Contig1_All	216	30	7.7417	36	9.5986	gi|224105081|ref|XP_002333864.1|	124.8	4e-28	nbs-lrr resistance protein [Populus trichocarpa] >gi|222838740|gb|EEE77105.1| nbs-lrr resistance protein [Populus trichocarpa]	gi|224115981|ref|XM_002331983.1|	337	3e-90	Populus trichocarpa BED finger-nbs-lrr resistance protein, mRNA	sp|O81825|DRL28_ARATH	48.5	9e-07	Probable disease resistance protein At4g27220 OS=Arabidopsis thaliana GN=At4g27220 PE=2 SV=1
CL10474.Contig2_All	536	10	1.0399	20	2.1489	gi|224108229|ref|XP_002333416.1|	246.5	1e-64	BED finger-nbs-lrr resistance protein [Populus trichocarpa] >gi|222836514|gb|EEE74921.1| BED finger-nbs-lrr resistance protein [Populus trichocarpa]	gi|224108228|ref|XM_002333379.1|	385	1e-104	Populus trichocarpa BED finger-nbs-lrr resistance protein, mRNA	sp|O81825|DRL28_ARATH	69.3	1e-12	Probable disease resistance protein At4g27220 OS=Arabidopsis thaliana GN=At4g27220 PE=2 SV=1
CL10474.Contig3_All	620	74	6.6529	69	6.4094	gi|224075094|ref|XP_002335862.1|	320.9	9e-87	predicted protein [Populus trichocarpa] >gi|222835879|gb|EEE74300.1| predicted protein [Populus trichocarpa]	gi|224108228|ref|XM_002333379.1|	666	0	Populus trichocarpa BED finger-nbs-lrr resistance protein, mRNA	sp|O81825|DRL28_ARATH	67.8	5e-12	Probable disease resistance protein At4g27220 OS=Arabidopsis thaliana GN=At4g27220 PE=2 SV=1
CL10474.Contig4_All	971	109	6.2572	99	5.8719	gi|224105081|ref|XP_002333864.1|	338.6	9e-92	nbs-lrr resistance protein [Populus trichocarpa] >gi|222838740|gb|EEE77105.1| nbs-lrr resistance protein [Populus trichocarpa]	gi|224108228|ref|XM_002333379.1|	559	1e-156	Populus trichocarpa BED finger-nbs-lrr resistance protein, mRNA	sp|Q42484|RPS2_ARATH	65.5	5e-11	Disease resistance protein RPS2 OS=Arabidopsis thaliana GN=RPS2 PE=1 SV=1
CL10474.Contig5_All	761	7	0.5127	7	0.5298	gi|224108229|ref|XP_002333416.1|	324.7	9e-88	BED finger-nbs-lrr resistance protein [Populus trichocarpa] >gi|222836514|gb|EEE74921.1| BED finger-nbs-lrr resistance protein [Populus trichocarpa]	gi|224108228|ref|XM_002333379.1|	567	1e-159	Populus trichocarpa BED finger-nbs-lrr resistance protein, mRNA	sp|Q940K0|DRL15_ARATH	64.3	7e-11	Probable disease resistance protein At1g61180 OS=Arabidopsis thaliana GN=At1g61180 PE=2 SV=2
CL10474.Contig6_All	336	36	5.9722	32	5.4849	gi|224075094|ref|XP_002335862.1|	182.6	1e-45	predicted protein [Populus trichocarpa] >gi|222835879|gb|EEE74300.1| predicted protein [Populus trichocarpa]	gi|224115981|ref|XM_002331983.1|	347	4e-93	Populus trichocarpa BED finger-nbs-lrr resistance protein, mRNA	sp|O81825|DRL28_ARATH	45.1	1e-05	Probable disease resistance protein At4g27220 OS=Arabidopsis thaliana GN=At4g27220 PE=2 SV=1
CL10474.Contig7_All	319	7	1.2231	7	1.2638	gi|224075094|ref|XP_002335862.1|	162.9	1e-39	predicted protein [Populus trichocarpa] >gi|222835879|gb|EEE74300.1| predicted protein [Populus trichocarpa]	gi|224112398|ref|XM_002332747.1|	280	8e-73	Populus trichocarpa BED finger-nbs-lrr resistance protein, mRNA	--	--	--	--
CL10475.Contig1_All	1196	214	9.9737	199	9.5825	gi|224092398|ref|XP_002309591.1|	563.5	2e-159	predicted protein [Populus trichocarpa] >gi|222855567|gb|EEE93114.1| predicted protein [Populus trichocarpa]	gi|359475794|ref|XM_002284898.2|	222	7e-55	PREDICTED: Vitis vinifera paramyosin-related protein-like (LOC100262733), mRNA	--	--	--	--
CL10475.Contig2_All	508	24	2.6334	19	2.154	gi|224092398|ref|XP_002309591.1|	47	1e-67	predicted protein [Populus trichocarpa] >gi|222855567|gb|EEE93114.1| predicted protein [Populus trichocarpa]	gi|224092397|ref|XM_002309555.1|	690	0	Populus trichocarpa predicted protein, mRNA	--	--	--	--
CL10476.Contig1_All	743	77	5.7766	102	7.9062	gi|224143836|ref|XP_002325091.1|	337.4	1e-91	predicted protein [Populus trichocarpa] >gi|222866525|gb|EEF03656.1| predicted protein [Populus trichocarpa]	gi|460265785|gb|GABL01007404.1|	69.9	4e-09	TSA: Camelina sativa comp20741_c0_seq1 transcribed RNA sequence	sp|Q9ZV51|ATL56_ARATH	130	8e-31	RING-H2 finger protein ATL56 OS=Arabidopsis thaliana GN=ATL56 PE=2 SV=1
[truncated: 68,409 more rows]
